# Supplementary material for: Deletion of Meg8-DMR Enhances Migration and Invasion of MLTC-1 Depending on the CTCF Binding Sites
Source: MDPI journal article supplement (doi:10.3390/ijms23158828), 2022-08-08
Supplement: s1 [file s1]

**TableS1 Primer Sequences**

| Primer name        | Primer sequence              |                                                                              |
|--------------------|------------------------------|------------------------------------------------------------------------------|
| sgRNA1             | GTTCTGCATCCGATAGAAGTTGG      |                                                                              |
| sgRNA2             | CCAAATGAGGAGGGGGGAGACAC      |                                                                              |
| sgRNA3             | GGGCGGCTGCAAACAGCGATAGG      |                                                                              |
| External primer F1 | GTGGGCAAAGGATGGATTGA         | Knockout targets and amplification primers for identifying homozygous clones |
| External primer R1 | TGGGTGGACTGAAGGGAAAG         |                                                                              |
| Internal primer F1 | TGCCAACTCACGGTGCAGTGGAAAT    |                                                                              |
| Internal primer F2 | TCCAAAGCGTAGGTCCCTCTTCGTGTC  |                                                                              |
| Fragment A-F       | GGATGGGGATAGAGGAGT           |                                                                              |
| Fragment A -R      | ACAGCAAACGACTCACCTT          |                                                                              |
| Fragment B-F       | CTTAAGATTTGTGCCAACTCAC       |                                                                              |
| Fragment B-R       | GGTCCCTCTTCGTGTCTC           | primers for construction of enhancer blocking assay vector                   |
| Fragment C-F       | TACGCTTTGGATTTCTGCGGCAGC     |                                                                              |
| Fragment C-R       | CAGGCTCTTCTTCACTCTTCC        |                                                                              |
| Fragment A-mut -F  | GGGCTACAGTTTTTTGCGTTCCCAAATG |                                                                              |
| Fragment A-mut -R  | TTGGGGGCGCCACAGACTCTTGCGTGC  |                                                                              |
| Dlk1-F             | ACGGGAAATTCTGCGAAATA         |                                                                              |
| Dlk1-R             | CTTTCCAGAGAACCCAGGTG         |                                                                              |
| Gtl2-F             | CGAGGACTTCACGCACAAC          |                                                                              |
| Gtl2-R             | TTACAGTTGGAGGGTCTCTGG        |                                                                              |
| Rian-F             | TAGAGTCTCCCTTGAAAGTGG        |                                                                              |
| Rian-R             | TGGTATCTATAAGAACAGAGCTGA     |                                                                              |
| Mirg-F             | GTTGTCTGTGATGAGTTCGC         |                                                                              |
| Mirg-R             | GTTCTTGAACATCCGCTCC          | qRT-PCR Primers                                                              |
| Gapdh-F            | GTCGTGGAGTCTACTGGTGTGTC      |                                                                              |
| Gapdh-R            | GAGCCCTTCCACAATGCCAAA        |                                                                              |
| Dlk1-DMR-F1        | ACATGGCCCTCCCAAGACCT         |                                                                              |
| Dlk1-DMR-R1        | GCTGCAGCCAGCTTGTTTCCT        |                                                                              |
| Dlk1-DMR-F2        | AATCGTCCCAGAGTGATG           |                                                                              |
| Dlk1-DMR-R2        | GTATTTTCGCTTGCTCTTCTC        |                                                                              |
| IG-DMR-F1          | TAAGTGTTGTGGTTTGTATGGGTA     |                                                                              |
| IG-DMR-R1          | CCATCCCCTATACTCAAAACATTCT    |                                                                              |
| IG-DMR-F2          | TGGTTTGTTATGGGTAAGTTTTATG    |                                                                              |
| IG-DMR-R2          | CTTCCCTCACTCCAAAAATTAAAA     |                                                                              |
| Gtl2-DMR-F         | AAATTTTGTAAGGAAAAGAATTTTAGG  | Primers for Methylation analysis                                             |
| Gtl2-DMR-R         | TTCAAATTAATAATCAACATAAACCTC  |                                                                              |
