# Supplementary material for: Deletion of Meg8-DMR Enhances Migration and Invasion of MLTC-1 Depending on the CTCF Binding Sites
Source: MDPI journal article supplement (doi:10.3390/ijms23158828), 2022-08-08
Supplement: s1 [file s1]

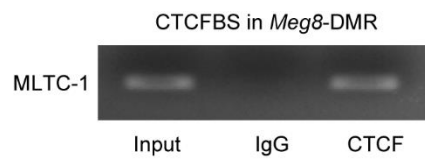

**Figure S1. ChIP analysis of CTCF in CTCFBS in MLTC-1 cells.** The ChIP assay was performed as described before [24]. The primers used for the ChIP analysis are same with the fragment A in the enhancer blocking assay.
