# Supplementary material for: Deletion of Meg8-DMR Enhances Migration and Invasion of MLTC-1 Depending on the CTCF Binding Sites
Source: Int J Mol Sci. 2022 Aug 8;23(15):8828. doi: 10.3390/ijms23158828 (PMC9369160; doi:10.3390/ijms23158828)
Supplement: Supplementary file 1 [file ijms-23-08828-s001.zip]

Archive with 6 entries (6 files):
- Figure S1.pdf
- Table S1.pdf
- Table S2_MLTC-1_vs_Meg8DMR-KO.txt.csv
- Table S3_MLTC-1_vs_CTCFBS-KO.txt.csv
- Table S4_MLTC-1_vs_(GGCG)n-KO.txt.csv
- Table S5 NEW_result_newtarget_MLTC-1_vs_Meg8DMR-KO.txt.csv.csv
