# Supplementary material for: Deletion of Meg8-DMR Enhances Migration and Invasion of MLTC-1 Depending on the CTCF Binding Sites
Source: Int J Mol Sci. 2022 Aug 8;23(15):8828. doi: 10.3390/ijms23158828 (PMC9369160; doi:10.3390/ijms23158828)
Supplement: Supplementary file 1 [file ijms-23-08828-s001.zip › Table S2_MLTC-1_vs_Meg8DMR-KO.txt.csv]

	id	baseMean	baseMeanA	baseMeanB	foldChange	log2FoldChange	pval	padj	Chromosome	Start.Site	End.Site	Direction	Length	Name
1	ENSMUSG00000031209	1127.299281	2249.3281	5.270462767	0.002343128	-8.737348759	4.62642e-34	6.72358e-30	X	96455359	96574485	+	7662	Heph
2	ENSMUSG00000021281	515.1350308	1030.270062	0	0	-Inf	1.93565e-27	1.40654e-23	12	111442469	111455018	+	4984	Tnfaip2
3	ENSMUSG00000021913	628.8189127	1251.31327	6.32455532	0.005054334	-7.628263255	3.30114e-25	1.59918e-21	14	32322019	32348151	+	4148	Ogdhl
4	ENSMUSG00000040856	377.6286573	754.203222	1.054092553	0.001397624	-9.482807957	5.26826e-22	1.91409e-18	12	109452823	109463336	+	5657	Dlk1
5	ENSMUSG00000059898	426.1696193	848.1228685	4.216370214	0.004971414	-7.652127928	3.32295e-21	9.65848e-18	18	19960930	20002351	-	5403	Dsc3
6	ENSMUSG00000026674	466.3305456	922.1201657	10.54092553	0.011431184	-6.450881315	2.23176e-19	5.40568e-16	1	169972307	170110762	-	9264	Ddr2
7	ENSMUSG00000084883	242.3885827	484.7771653	0	0	-Inf	1.08047e-17	2.2432e-14	12	108203602	108275425	-	4337	Ccdc85c
8	ENSMUSG00000051985	239.0154865	4.74341649	473.2875565	99.77777778	6.640646633	2.57876e-14	4.68464e-11	1	135953578	136006342	-	8996	Igfn1
9	ENSMUSG00000039323	1678.589687	3112.629901	244.5494724	0.078566833	-3.66993579	9.28126e-14	1.49872e-10	1	72824503	72852474	+	1847	Igfbp2
10	ENSMUSG00000022416	149.1540963	0	298.3081926	Inf	Inf	4.86728e-13	7.07362e-10	15	80287238	80398279	+	9862	Cacna1i
11	ENSMUSG00000030450	289.1375874	563.517879	14.75729575	0.026187804	-5.254961105	1.37426e-12	1.81565e-09	7	56239760	56536518	+	3961	Oca2
12	ENSMUSG00000031936	382.8464154	736.1782393	29.51459149	0.040091638	-4.640554827	1.78314e-12	2.15953e-09	9	15051841	15112108	-	5261	Hephl1
13	ENSMUSG00000023959	342.1057382	27.51181564	656.6996608	23.8697318	4.577110451	9.04301e-12	1.01094e-08	17	44188584	44280172	+	8782	Clic5
14	ENSMUSG00000026840	796.1034009	118.5854123	1473.62139	12.42666667	3.635367454	1.06881e-11	1.1095e-08	2	31887291	31946539	+	6091	Lamc3
15	ENSMUSG00000042834	141.0902883	2.846049894	279.3345266	98.14814815	6.616889142	2.95153e-10	2.85964e-07	18	33437019	33464029	-	2513	Nrep
16	ENSMUSG00000061462	619.2793751	104.3551628	1134.203587	10.86868687	3.442105742	4.32915e-10	3.93222e-07	11	58994256	59136402	-	28898	Obscn
17	ENSMUSG00000032715	2455.666717	4304.176123	607.1573108	0.141062376	-2.825594849	8.51606e-10	7.28023e-07	2	152337422	152344032	-	2125	Trib3
18	ENSMUSG00000032549	96.7656964	193.5313928	0	0	-Inf	3.79581e-09	2.9034e-06	9	103111787	103185276	+	5031	Rab6b
19	ENSMUSG00000033715	96.7656964	193.5313928	0	0	-Inf	3.79581e-09	2.9034e-06	13	4049011	4090688	+	3239	Akr1c14
20	ENSMUSG00000029304	440.1363457	74.94598055	805.3267108	10.74542897	3.425651173	6.14383e-09	4.46441e-06	5	104435118	104441050	+	1648	Spp1
21	ENSMUSG00000040618	2497.830419	4294.68929	700.971548	0.163218222	-2.615125967	9.7427e-09	6.74241e-06	14	55540266	55551242	+	7806	Pck2
22	ENSMUSG00000045312	1374.53669	2381.195078	367.8783011	0.154493139	-2.694385329	1.81922e-08	1.20176e-05	13	94057796	94195409	+	8415	Lhfpl2
23	ENSMUSG00000054920	252.8240989	31.30654884	474.341649	15.15151515	3.921390165	2.0351e-08	1.28592e-05	5	65107539	65168188	+	7057	Klhl5
24	ENSMUSG00000021390	442.8242817	83.48413023	802.1644331	9.608585859	3.264324118	2.20736e-08	1.33665e-05	13	49608046	49624501	+	2566	Ogn
25	ENSMUSG00000020142	1217.793127	2081.411156	354.1750979	0.170161045	-2.555027294	1.13104e-07	6.57495e-05	11	20302180	20332713	-	3926	Slc1a4
26	ENSMUSG00000027313	393.0184085	704.8716905	81.16512661	0.115148796	-3.118428766	1.69038e-07	9.44859e-05	2	119351229	119354381	+	1637	Chac1
27	ENSMUSG00000033597	573.4790537	1004.655613	142.3024947	0.141643059	-2.819668183	2.05457e-07	0.000110589	17	24488783	24508905	+	6172	Caskin1
28	ENSMUSG00000043336	614.1143216	159.3787941	1068.849849	6.706349206	2.745527608	2.64409e-07	0.000137238	16	57353093	57573126	+	5335	Filip1l
29	ENSMUSG00000037979	100.929362	4.74341649	197.1153075	41.55555556	5.376969458	6.23994e-07	0.000312707	5	124834418	124862424	-	2729	Ccdc92
30	ENSMUSG00000055301	6152.68553	10009.55748	2295.813581	0.229362146	-2.124300788	8.69839e-07	0.000421379	3	138217760	138233382	+	3787	Adh7
31	ENSMUSG00000042717	533.9505829	150.8406444	917.0605214	6.07966457	2.603991729	1.6694e-06	0.000782624	6	14713977	14755274	-	6965	Ppp1r3a
32	ENSMUSG00000021831	12942.62271	20777.11291	5108.132514	0.245853817	-2.024127341	1.88081e-06	0.000839677	14	45283087	45318771	-	5285	Ero1l
33	ENSMUSG00000041324	627.4485924	1067.26871	187.6284745	0.175802469	-2.507972762	1.90665e-06	0.000839677	13	16011851	16031621	+	6390	Inhba
34	ENSMUSG00000034361	140.8794698	16.12761607	265.6313235	16.47058824	4.041820176	2.30186e-06	0.000983911	8	94532990	94570531	+	3200	Cpne2
35	ENSMUSG00000021069	1272.237007	2088.051939	456.4220756	0.218587511	-2.193717122	3.43847e-06	0.001427751	12	70190811	70231488	-	6895	Pygl
36	ENSMUSG00000038418	186.4162681	31.30654884	341.5259873	10.90909091	3.447458977	3.90901e-06	0.001578045	18	34859823	34864984	+	4484	Egr1
37	ENSMUSG00000024107	1257.479712	2059.59144	455.3679831	0.221096269	-2.177253415	4.11836e-06	0.001617626	17	88741549	88791976	-	2553	Lhcgr
38	ENSMUSG00000030747	227.2623545	45.53679831	408.9879107	8.981481481	3.166953435	4.45888e-06	0.001705287	7	99153658	99182719	-	3083	Dgat2
39	ENSMUSG00000025408	3001.001499	4790.850655	1211.152344	0.252805281	-1.983901496	6.76379e-06	0.002482096	10	127290774	127296288	+	1713	Ddit3
40	ENSMUSG00000028893	1375.485373	2231.303117	519.6676288	0.232898715	-2.102225415	6.83161e-06	0.002482096	4	132492032	132510501	-	3475	Sesn2
41	ENSMUSG00000005087	1046.819315	1705.73257	387.9060596	0.227413175	-2.136612256	9.16789e-06	0.003249682	2	102811141	102901665	-	6776	Cd44
42	ENSMUSG00000045053	51.22889809	102.4577962	0	0	-Inf	1.58988e-05	0.005429528	17	83585957	83631895	-	3356	Kcng3
43	ENSMUSG00000017733	513.3957781	169.8143104	856.9772459	5.046554935	2.335298858	1.60648e-05	0.005429528	2	164588343	164593594	-	778	Eppin
44	ENSMUSG00000021144	1270.339641	2036.823041	503.8562405	0.247373596	-2.015236574	1.76374e-05	0.005825538	12	113098278	113137206	+	3104	Mta1
45	ENSMUSG00000021054	1131.199424	452.5219332	1809.876914	3.999534125	1.999831961	2.51575e-05	0.00812477	12	75714249	75735729	-	5649	Sgpp1
46	ENSMUSG00000060402	63.66719022	125.2261953	2.108185107	0.016835017	-5.892391026	2.61293e-05	0.008253885	7	34674468	34812711	-	5966	Chst8
47	ENSMUSG00000049515	46.90711863	0	93.81423725	Inf	Inf	2.66932e-05	0.008253885	1	91322075	91348306	+	5445	Espnl
48	ENSMUSG00000044337	175.8753425	315.9115383	35.83914682	0.11344678	-3.139912432	2.89651e-05	0.008769794	1	90203980	90216751	+	3348	Ackr3
49	ENSMUSG00000039470	642.7856391	1047.346361	238.2249171	0.227455717	-2.136342401	3.50399e-05	0.010389511	8	40423815	40510268	+	5528	Zdhhc2
50	ENSMUSG00000078234	857.240769	336.7825708	1377.698967	4.090766823	2.032371305	3.57445e-05	0.010389511	4	139960220	139968026	-	7807	Klhdc7a
51	ENSMUSG00000029752	2941.550679	4570.75613	1312.345229	0.287117753	-1.800285558	4.03408e-05	0.011450883	6	7675169	7693254	-	2735	Asns
52	ENSMUSG00000000957	110.7851274	206.812959	14.75729575	0.071355759	-3.808826309	4.0972e-05	0.011450883	14	54431612	54445364	+	5960	Mmp14
53	ENSMUSG00000073491	45.53679831	91.07359661	0	0	-Inf	5.01158e-05	0.013742143	1	173566283	173599274	-	6840	Ifi213
54	ENSMUSG00000096727	127.7560175	233.3760913	22.13594362	0.094850949	-3.398193989	7.08678e-05	0.019072622	17	34181988	34187764	-	3659	Psmb9
55	ENSMUSG00000023886	1234.974836	1933.416561	536.5331097	0.277505179	-1.849413397	7.77675e-05	0.020549007	17	14279506	14404790	+	6951	Smoc2
56	ENSMUSG00000038677	118.5327076	19.92234926	217.143066	10.8994709	3.446186198	8.72983e-05	0.02244438	17	28142141	28174854	+	8844	Scube3
57	ENSMUSG00000061232	159.2206802	283.6563061	34.78505426	0.122630992	-3.027604461	8.80293e-05	0.02244438	17	33996017	34000333	-	2608	H2-K1
58	ENSMUSG00000047534	910.9994893	1437.255197	384.743782	0.267693436	-1.901346331	9.09745e-05	0.022795384	12	65132734	65172604	-	7990	Mis18bp1
59	ENSMUSG00000028128	192.793528	49.3315315	336.2555245	6.816239316	2.768975989	9.93036e-05	0.024460674	3	121723537	121735048	+	2527	F3
60	ENSMUSG00000039987	176.7186166	44.58811501	308.8491181	6.926713948	2.792171096	0.000139185	0.033712855	5	20758663	20882124	-	6929	Phtf2
61	ENSMUSG00000031770	2627.589212	3998.700101	1256.478324	0.314221695	-1.670145302	0.000143475	0.034182426	8	94386438	94395377	+	2333	Herpud1
62	ENSMUSG00000032577	47.48686953	93.91964651	1.054092553	0.011223345	-6.477353527	0.00015564	0.036482561	9	107254927	107289877	-	5542	Mapkapk3
63	ENSMUSG00000028838	1054.039849	1632.683956	475.3957416	0.291174382	-1.780044665	0.000179672	0.04098736	4	134356372	134383850	-	4333	Extl1
64	ENSMUSG00000002997	1905.27229	2902.970892	907.5736885	0.312636166	-1.677443417	0.000182676	0.04098736	12	31958476	32061296	-	3652	Prkar2b
65	ENSMUSG00000032968	579.6981997	921.1714824	238.2249171	0.258610825	-1.95114543	0.000185343	0.04098736	1	75507077	75510366	+	1475	Inha
66	ENSMUSG00000036412	46.53818623	92.02227991	1.054092553	0.011454754	-6.447909749	0.00018614	0.04098736	18	60911780	60918561	+	2975	Arsi
67	ENSMUSG00000052026	164.2803244	287.4510393	41.10960958	0.143014301	-2.805768671	0.000200008	0.043383793	18	60995381	61014199	-	3342	Slc6a7
68	ENSMUSG00000024085	3354.913074	1664.939188	5044.886961	3.030072808	1.59935246	0.000221727	0.04734558	17	64600736	64755110	+	7223	Man2a1
69	ENSMUSG00000019894	449.992111	722.8966731	177.087549	0.244969379	-2.029326671	0.000224788	0.04734558	10	103367783	103419377	+	7752	Slc6a15
70	ENSMUSG00000020865	128.6519961	27.51181564	229.7921766	8.352490421	3.062206423	0.000234018	0.048154146	11	94343295	94392997	-	5698	Abcc3
71	ENSMUSG00000027004	2351.048031	3549.972901	1152.123161	0.324544213	-1.623513064	0.000235254	0.048154146	2	80411970	80447625	-	3237	Frzb
72	ENSMUSG00000037936	55.65608682	108.149896	3.16227766	0.029239766	-5.09592442	0.000245106	0.049474015	5	125277087	125341094	-	8500	Scarb1
73	ENSMUSG00000063659	1424.131744	2171.536069	676.7274193	0.311635358	-1.682069167	0.000248531	0.049478189	1	177442351	177450764	+	6138	Zbtb18
74	ENSMUSG00000009633	1470.66993	2235.09785	706.2420108	0.315978117	-1.662103445	0.000280059	0.055001309	1	193272161	193273217	-	871	G0s2
75	ENSMUSG00000021226	1155.232734	1765.499618	544.9658501	0.308675145	-1.695838776	0.000299531	0.058041051	12	83987861	83993873	+	2196	Acot2
76	ENSMUSG00000074003	82.11380991	11.38419958	152.8434202	13.42592593	3.746949683	0.000314704	0.060178922	7	98440416	98477479	+	4102	Gucy2d
77	ENSMUSG00000035954	50.43832868	2.846049894	98.03060747	34.44444444	5.106199404	0.000402972	0.075870531	12	40445952	40846874	+	22923	Dock4
78	ENSMUSG00000022587	406.1945654	164.1222106	648.2669203	3.949903661	1.981817466	0.000407204	0.075870531	15	74955051	74959905	+	3784	Ly6e
79	ENSMUSG00000022364	2376.978708	3538.588702	1215.368714	0.343461424	-1.541780024	0.000459619	0.084552391	15	57912199	57970067	+	6366	Tbc1d31
80	ENSMUSG00000021275	754.0978127	1159.29099	348.9046352	0.300963812	-1.73233807	0.000478672	0.086811924	12	110889264	110972394	+	9553	Tecpr2
81	ENSMUSG00000021266	1492.963988	2241.738633	744.1893427	0.331969718	-1.590876447	0.000483848	0.086811924	12	108860030	108894174	-	3447	Wars
82	ENSMUSG00000029381	48.85718985	2.846049894	94.86832981	33.33333333	5.058893689	0.000529751	0.093888724	5	92683435	92965318	+	13247	Shroom3
83	ENSMUSG00000015090	117.0569781	27.51181564	206.6021405	7.509578544	2.908731942	0.000672746	0.117795424	2	25466709	25470046	-	1649	Ptgds
84	ENSMUSG00000026456	2458.618176	3624.918882	1292.31747	0.356509349	-1.487988185	0.000691867	0.11921889	1	134405559	134411740	+	4437	Cyb5r1
85	ENSMUSG00000024640	1624.620148	2414.398994	834.8413023	0.345776031	-1.532090227	0.000697282	0.11921889	19	15904678	15947337	-	4254	Psat1
86	ENSMUSG00000021096	2691.625335	3956.009353	1427.241317	0.360778044	-1.470816551	0.000746355	0.126125281	12	72757455	72799819	+	12829	Ppm1a
87	ENSMUSG00000041594	1448.375873	2152.562403	744.1893427	0.345722541	-1.532313427	0.0007858	0.13061508	14	122918971	122984035	-	8280	Tmtc4
88	ENSMUSG00000049100	90.01950406	163.1735273	16.86548085	0.103359173	-3.274261661	0.000790898	0.13061508	3	45378398	45435623	+	15888	Pcdh10
89	ENSMUSG00000035778	41.5312466	1.897366596	81.16512661	42.77777778	5.418789634	0.000918141	0.14992528	2	35400179	35463231	-	4709	Ggta1
90	ENSMUSG00000019326	2855.220499	4170.411778	1540.029221	0.369275099	-1.437232115	0.000939748	0.151748453	11	101330605	101341938	+	4621	Aoc3
91	ENSMUSG00000026547	1004.075862	1497.970928	510.1807958	0.34058124	-1.553929125	0.001058674	0.169073759	1	172500047	172507380	+	2082	Tagln2
92	ENSMUSG00000003469	605.9978089	922.1201657	289.8754522	0.314357567	-1.669521602	0.001132318	0.177483991	14	70457476	70468832	+	2910	Phyhip
93	ENSMUSG00000020123	169.7089011	284.6049894	54.81281278	0.192592593	-2.376375879	0.001135761	0.177483991	10	122448499	122453452	+	2670	Avpr1a
94	ENSMUSG00000002831	688.0589142	336.7825708	1039.335258	3.086071987	1.625771715	0.001173391	0.181413771	17	56100591	56109803	-	5777	Plin4
95	ENSMUSG00000030987	1093.831843	565.4152456	1622.24844	2.869127517	1.520612089	0.001189119	0.181910149	7	102267806	102437319	+	10371	Stim1
96	ENSMUSG00000033910	1826.426167	982.8358968	2670.016438	2.716645217	1.441826167	0.001240584	0.186431338	3	82092427	82145789	-	6968	Gucy1a1
97	ENSMUSG00000040412	1553.57431	828.2005192	2278.9481	2.751686394	1.460316058	0.001248676	0.186431338	3	108455694	108536536	-	6304	5330417C22Rik
98	ENSMUSG00000074604	128.9155193	221.9918917	35.83914682	0.161443495	-2.630898785	0.001257477	0.186431338	3	51660360	51682677	+	3703	Mgst2
99	ENSMUSG00000024817	340.2610762	535.0573801	145.4647724	0.271867612	-1.879023802	0.001269986	0.186431338	19	30030513	30093722	+	8590	Uhrf2
100	ENSMUSG00000002910	388.3276967	172.6603602	603.9950331	3.498168498	1.806599782	0.001325531	0.192639413	8	70835129	70839720	-	3232	Arrdc2
101	ENSMUSG00000056770	2623.214728	3802.322659	1444.106798	0.379795964	-1.396703522	0.00135542	0.195032882	12	108106431	108179314	-	6035	Setd3
102	ENSMUSG00000024247	1079.865116	1594.736624	564.9936086	0.35428647	-1.497011725	0.001438139	0.203067713	17	83215292	83225070	+	2712	Pkdcc
103	ENSMUSG00000026628	239.4371235	386.1141023	92.7601447	0.24024024	-2.057450272	0.001439206	0.203067713	1	191170296	191218039	-	2154	Atf3
104	ENSMUSG00000045802	29.40918224	58.81836448	0	0	-Inf	0.001501119	0.209766961	X	96306178	96456294	-	3659	Hsf3
105	ENSMUSG00000037466	323.8172324	508.4942478	139.140217	0.273631841	-1.869691978	0.001533529	0.212254989	12	113156421	113166048	+	4299	Tedc1
106	ENSMUSG00000020181	226.5244897	87.27886342	365.770116	4.190821256	2.06723299	0.001605267	0.218082577	10	109681259	110456204	-	15207	Nav3
107	ENSMUSG00000052613	309.2180505	486.6745319	131.7615692	0.270738575	-1.885027637	0.001605645	0.218082577	10	73099342	74649737	+	23773	Pcdh15
108	ENSMUSG00000014846	58.23861357	109.0985793	7.378647874	0.06763285	-3.886132035	0.001626558	0.218877512	8	105467493	105471526	-	1848	Tppp3
109	ENSMUSG00000027175	64.03612262	118.5854123	9.486832981	0.08	-3.64385619	0.00168544	0.2219071	2	104657288	104712169	-	6877	Tcp11l1
110	ENSMUSG00000063415	699.7593416	1046.397678	353.1210054	0.337463483	-1.567196697	0.001691276	0.2219071	6	84571414	84593908	-	5352	Cyp26b1
111	ENSMUSG00000026023	631.8230765	314.962855	948.6832981	3.012048193	1.590744853	0.001720566	0.2219071	1	59256906	59352993	+	2507	Cdk15
112	ENSMUSG00000005667	2917.517369	4196.974911	1638.059828	0.390295359	-1.357361788	0.001724461	0.2219071	6	83305691	83325908	-	3487	Mthfd2
113	ENSMUSG00000034981	2464.995436	1375.590782	3554.40009	2.583908046	1.369554729	0.001725418	0.2219071	5	91517615	91626894	+	5068	Parm1
114	ENSMUSG00000041329	2143.339093	3095.553602	1191.124585	0.384785644	-1.377873121	0.001779409	0.226843481	11	69599736	69605942	-	4085	Atp1b2
115	ENSMUSG00000020964	2871.875162	4126.772347	1616.977977	0.391826309	-1.351713825	0.001814861	0.229351024	12	91806043	91849157	-	8555	Sel1l
116	ENSMUSG00000005836	1863.266702	1031.218745	2695.314659	2.613717674	1.386103314	0.001847632	0.231479572	18	11052508	11085635	+	5590	Gata6
117	ENSMUSG00000046694	27.40640639	0	54.81281278	Inf	Inf	0.001874022	0.232545262	4	133480132	133487938	+	2287	Tent5b
118	ENSMUSG00000057604	516.7688743	251.401074	782.1366746	3.111111111	1.637429921	0.00188814	0.232545262	6	112273758	112330425	+	1730	Lmcd1
119	ENSMUSG00000028211	739.0242892	1098.575259	379.4733192	0.345423143	-1.533563348	0.001925525	0.234169798	4	11156431	11174379	+	6475	Trp53inp1
120	ENSMUSG00000024056	715.0963882	1064.42266	365.770116	0.343632402	-1.541062015	0.001933556	0.234169798	17	71496100	71526857	-	6493	Ndc80
121	ENSMUSG00000027122	1678.378868	2423.885827	932.8719097	0.384866275	-1.377570837	0.002142996	0.256828053	2	106962527	106974424	-	5313	Arl14ep
122	ENSMUSG00000031654	152.6326017	51.22889809	254.0363054	4.958847737	2.310004928	0.002155991	0.256828053	8	87468405	87472609	-	3037	Cbln1
123	ENSMUSG00000020256	2578.521204	3686.583296	1470.459112	0.39886773	-1.326017685	0.002330908	0.27540721	10	83487450	83534140	-	7503	Aldh1l2
124	ENSMUSG00000096001	49.12071299	92.97096321	5.270462767	0.056689342	-4.140778656	0.00238987	0.28009664	14	37102140	37114022	-	828	2610528A11Rik
125	ENSMUSG00000039158	236.8018921	376.6272693	96.97651491	0.257486706	-1.957430148	0.002413845	0.280643317	4	63367125	63403354	-	5765	Akna
126	ENSMUSG00000037896	1516.10132	2185.766319	846.4363204	0.387249228	-1.36866573	0.002487761	0.285248662	12	111039351	111115901	+	5684	Rcor1
127	ENSMUSG00000027931	465.3818623	227.6839915	703.0797331	3.087962963	1.626655449	0.002492712	0.285248662	3	90450591	90465866	-	4783	Npr1
128	ENSMUSG00000039982	52.01946751	97.7143797	6.32455532	0.064724919	-3.949534933	0.002513822	0.285416943	19	12466341	12501996	-	5765	Dtx4
129	ENSMUSG00000040205	546.0199427	275.1181564	816.9217289	2.969348659	1.570146504	0.00255299	0.287007081	7	131308554	131322292	-	2256	Cuzd1
130	ENSMUSG00000056069	48.64637134	92.02227991	5.270462767	0.057273769	-4.125981654	0.002567324	0.287007081	15	27655069	27681579	-	3241	Otulinl
131	ENSMUSG00000068735	202.701998	326.3470545	79.0569415	0.242248062	-2.045442971	0.002589751	0.287304216	2	93187548	93201759	+	3690	Trp53i11
132	ENSMUSG00000019838	726.1116554	382.3193691	1069.903942	2.798456024	1.484631077	0.002691074	0.296283134	10	40033532	40142258	-	7356	Slc16a10
133	ENSMUSG00000003341	270.6909677	117.636729	423.7452065	3.602150538	1.848858474	0.002744417	0.297750834	10	80519584	80539124	-	4713	Atp8b3
134	ENSMUSG00000039457	613.7980938	316.8602215	910.7359661	2.874251497	1.523186303	0.002764698	0.297750834	16	5086291	5132421	-	6893	Ppl
135	ENSMUSG00000021279	1507.141533	2166.792653	847.4904129	0.391126678	-1.354292151	0.002765868	0.297750834	12	111292976	111377718	-	7375	Cdc42bpb
136	ENSMUSG00000017843	1872.542716	2676.235584	1068.849849	0.399385561	-1.32414592	0.002888556	0.307237316	12	110447120	110583062	+	8286	Ppp2r5c
137	ENSMUSG00000046598	537.6926115	273.2207898	802.1644331	2.93595679	1.553830736	0.002896271	0.307237316	16	31422280	31458901	+	3888	Bdh1
138	ENSMUSG00000038508	96.60758252	167.9169438	25.29822128	0.150659134	-2.730639956	0.002933882	0.307895391	8	70629393	70632456	-	1852	Gdf15
139	ENSMUSG00000062184	225.1541694	92.97096321	357.3373756	3.843537415	1.942434712	0.002944847	0.307895391	X	51387212	51681856	-	7807	Hs6st2
140	ENSMUSG00000047878	655.6455682	967.656964	343.6341724	0.355119826	-1.493622189	0.003002517	0.310979336	15	83226722	83251774	-	2278	A4galt
141	ENSMUSG00000038732	36.62971623	71.15124735	2.108185107	0.02962963	-5.076815597	0.003017139	0.310979336	13	30136489	30246717	+	3659	Mboat1
142	ENSMUSG00000022223	26.0887907	52.17758139	0	0	-Inf	0.003109167	0.316436484	14	55897283	55900293	-	2469	Sdr39u1
143	ENSMUSG00000021109	5842.67691	8218.443411	3466.910408	0.42184514	-1.245214616	0.003113632	0.316436484	12	73901375	73947530	+	5896	Hif1a
144	ENSMUSG00000091712	45.06245666	4.74341649	85.38149682	18	4.169925001	0.003172405	0.318372528	16	5147109	5187271	+	5740	Sec14l5
145	ENSMUSG00000043639	74.99868517	16.12761607	133.8697543	8.300653595	3.053224939	0.003187926	0.318372528	19	53677306	53867080	+	6790	Rbm20
146	ENSMUSG00000068349	50.75455645	6.640783086	94.86832981	14.28571429	3.836501268	0.003205078	0.318372528	15	74813452	74818815	-	1152	Gml
147	ENSMUSG00000022456	30.51597942	0.948683298	60.08327554	63.33333333	5.984893108	0.00322031	0.318372528	15	82274893	82294574	+	6620	Sept3
148	ENSMUSG00000010755	1787.899084	2549.112022	1026.686147	0.402762271	-1.31199955	0.003252279	0.319360576	7	143557230	143600090	-	6583	Cars
149	ENSMUSG00000015217	505.7009025	754.203222	257.198583	0.341020266	-1.552070619	0.003307296	0.321615876	X	71555918	71560676	+	2234	Hmgb3
150	ENSMUSG00000020658	435.9726801	216.299792	655.6455682	3.031189084	1.599883849	0.003319506	0.321615876	12	3962554	4038915	-	10382	Efr3b
151	ENSMUSG00000051950	211.2401477	87.27886342	335.201432	3.84057971	1.941324093	0.003561667	0.3392146	5	149678230	149762599	+	4798	B3glct
152	ENSMUSG00000047631	502.2223971	257.0931738	747.3516204	2.906929069	1.539495869	0.003568918	0.3392146	10	128268671	128270153	+	1258	Apof
153	ENSMUSG00000027901	35.68103293	69.25388076	2.108185107	0.0304414	-5.037821465	0.003577781	0.3392146	3	106482405	106503030	+	6868	Dennd2d
154	ENSMUSG00000053931	3100.560541	1831.907449	4369.213634	2.385062432	1.254027031	0.003594775	0.3392146	3	121426497	121458207	+	3037	Cnn3
155	ENSMUSG00000034801	1901.793785	2699.952666	1103.634903	0.408760834	-1.290671126	0.003617853	0.3392146	12	69583762	69681852	-	8514	Sos2
156	ENSMUSG00000066829	165.8087586	269.4260566	62.19146065	0.230829421	-2.115100977	0.003642443	0.339330958	9	22276748	22307648	-	6133	Zfp810
157	ENSMUSG00000023067	338.6799374	516.0837141	161.2761607	0.3125	-1.678071905	0.003791077	0.350928206	17	29090976	29100727	+	3553	Cdkn1a
158	ENSMUSG00000025007	1743.574493	2474.166041	1012.982944	0.409423995	-1.28833244	0.003902979	0.358999921	19	40550257	40588463	-	4072	Aldh18a1
159	ENSMUSG00000074264	2500.518355	1476.151212	3524.885499	2.387889175	1.255735881	0.00392969	0.359183581	3	113555710	113606699	-	3446	Amy1
160	ENSMUSG00000020331	953.8483516	533.1600135	1374.53669	2.578094108	1.366304927	0.004007394	0.363996614	10	79716634	79736108	+	3195	Hcn2
161	ENSMUSG00000020949	358.2860589	542.6468465	173.9252713	0.320512821	-1.641546029	0.004046065	0.365226431	12	65062424	65074007	-	7849	Fkbp3
162	ENSMUSG00000059479	379.1043868	186.8906097	571.3181639	3.056965595	1.612100315	0.004141073	0.37149512	7	25626654	25635100	+	6474	B3gnt8
163	ENSMUSG00000071359	828.8329747	1199.135689	458.5302607	0.382383966	-1.386906064	0.00418438	0.37307723	10	22703879	22731938	-	3271	Tbpl1
164	ENSMUSG00000028763	4653.344282	2807.153879	6499.534684	2.315346776	1.211228286	0.004243479	0.374096133	4	137468769	137570630	+	14307	Hspg2
165	ENSMUSG00000046805	24.66576575	49.3315315	0	0	-Inf	0.00426079	0.374096133	19	12460779	12465284	+	4335	Mpeg1
166	ENSMUSG00000049791	2089.896601	2947.559007	1232.234195	0.418052426	-1.258244218	0.004273031	0.374096133	7	89404355	89413134	+	6720	Fzd4
167	ENSMUSG00000035946	96.71299177	166.0195772	27.40640639	0.165079365	-2.5987683	0.004343821	0.378016446	5	75075601	75077893	+	1665	Gsx2
168	ENSMUSG00000035697	104.9876183	178.35246	31.6227766	0.177304965	-2.495695163	0.004427942	0.383043374	10	80016653	80031472	+	4478	Arhgap45
169	ENSMUSG00000028373	160.5382959	259.9392237	61.1373681	0.235198702	-2.088047994	0.004484456	0.38563666	4	65380803	66404611	-	4959	Astn2
170	ENSMUSG00000028034	3707.401624	2236.046534	5178.756715	2.316032622	1.211655574	0.004545618	0.387623565	3	152210422	152236826	+	15500	Fubp1
171	ENSMUSG00000029314	123.012601	204.9155924	41.10960958	0.200617284	-2.31748219	0.004584372	0.387623565	5	100845713	100899102	+	3502	Gpat3
172	ENSMUSG00000034201	1592.575734	932.555682	2252.595787	2.415508082	1.27232668	0.004633035	0.387623565	11	5054132	5065327	-	6100	Gas2l1
173	ENSMUSG00000051727	130.8128859	45.53679831	216.0889734	4.74537037	2.246520692	0.004657049	0.387623565	7	97451323	97459557	+	2568	Kctd14
174	ENSMUSG00000048922	1161.820812	1656.401038	667.2405863	0.402825506	-1.311773061	0.004664551	0.387623565	14	67676331	67715841	-	5715	Cdca2
175	ENSMUSG00000001864	5429.419924	3305.21261	7553.627238	2.285368032	1.192426513	0.004667593	0.387623565	2	31950139	31973442	+	4032	Aif1l
176	ENSMUSG00000021288	1297.904161	1844.240331	751.5679906	0.407521719	-1.295051144	0.00470561	0.38856038	12	111758849	111807844	+	4070	Klc1
177	ENSMUSG00000058013	951.4766433	1363.257899	539.6953873	0.395886492	-1.336841253	0.004874451	0.400228263	5	93093437	93176447	+	9472	Sept11
178	ENSMUSG00000045404	29.46188687	57.86968118	1.054092553	0.018214936	-5.778734244	0.005021015	0.40994615	12	99964499	100062682	+	3112	Kcnk13
179	ENSMUSG00000027443	354.596735	533.1600135	176.0334564	0.330170028	-1.598718934	0.005167054	0.41951283	2	148789361	148793546	+	655	Cst12
180	ENSMUSG00000002324	23.71708245	47.4341649	0	0	-Inf	0.005262136	0.421030545	14	55618037	55625395	+	2935	Rec8
181	ENSMUSG00000034285	451.4678406	667.8730418	235.0626394	0.351957071	-1.506528625	0.005263877	0.421030545	11	4873951	4894200	+	2649	Nipsnap1
182	ENSMUSG00000037820	1098.944192	634.6691264	1563.219257	2.463046006	1.300443575	0.005272659	0.421030545	2	158116402	158146436	-	4608	Tgm2
183	ENSMUSG00000031434	37.15676251	71.15124735	3.16227766	0.044444444	-4.491853096	0.005381053	0.42470477	X	139821632	139871677	-	6051	Morc4
184	ENSMUSG00000017692	603.6261007	329.1931044	878.059097	2.667307077	1.415383926	0.005413762	0.42470477	11	80300912	80355955	+	4734	Rhbdl3
185	ENSMUSG00000024143	784.2975643	1127.984441	440.6106873	0.390617699	-1.356170774	0.005422852	0.42470477	17	86963082	87000069	+	4151	Rhoq
186	ENSMUSG00000071847	125.1207861	43.63943171	206.6021405	4.734299517	2.243150982	0.005444388	0.42470477	18	62922327	62953195	+	2799	Apcdd1
187	ENSMUSG00000035578	330.1944923	498.0587315	162.3302532	0.325925926	-1.617383978	0.00546479	0.42470477	16	33012683	33056218	-	6164	Iqcg
188	ENSMUSG00000061533	282.2859858	430.7022173	133.8697543	0.310817425	-1.685860707	0.005544335	0.428594757	12	90998492	91384409	-	14093	Cep128
189	ENSMUSG00000047832	443.7202603	655.540159	231.9003617	0.353754623	-1.499179093	0.005652328	0.434631146	12	112820229	112829423	-	4198	Cdca4
190	ENSMUSG00000027947	423.6397972	220.0945251	627.1850693	2.849616858	1.510767957	0.00572394	0.437123747	3	89864059	89913196	-	8642	Il6ra
191	ENSMUSG00000020649	7649.233432	10555.05037	4743.41649	0.449397807	-1.153935011	0.0057449	0.437123747	12	24708241	24714146	+	2771	Rrm2
192	ENSMUSG00000040010	11053.0037	15220.67483	6885.332559	0.452367102	-1.144434082	0.005838817	0.441564386	8	121881150	121907694	-	3708	Slc7a5
193	ENSMUSG00000042507	1188.383945	1681.066804	695.7010852	0.413844996	-1.272837581	0.005875654	0.441564386	12	84149176	84218881	-	7611	Elmsan1
194	ENSMUSG00000021103	364.505205	544.5442131	184.4661968	0.338753388	-1.561692721	0.005906584	0.441564386	12	73123717	73273988	+	5385	Mnat1
195	ENSMUSG00000022033	1344.126119	1894.520546	793.7316927	0.418961776	-1.255109469	0.005934863	0.441564386	14	65805837	65817822	+	1791	Pbk
196	ENSMUSG00000031351	641.520728	927.8122655	355.2291905	0.38286753	-1.38508278	0.005955179	0.441564386	X	72987339	73031543	+	3707	Zfp185
197	ENSMUSG00000030352	67.14569565	15.17893277	119.1124585	7.847222222	2.972182056	0.006016539	0.441716763	6	127961396	128143594	-	4975	Tspan9
198	ENSMUSG00000046337	627.3431831	907.8899162	346.7964501	0.381980727	-1.388428247	0.00602774	0.441716763	1	36562692	36683183	-	3190	Fam178b
199	ENSMUSG00000046324	960.5418393	554.9797294	1366.103949	2.461538462	1.299560282	0.006069104	0.441716763	19	29608214	29648415	-	9338	Ermp1
200	ENSMUSG00000022040	115.3177253	191.6340262	39.00142448	0.203520352	-2.296755024	0.00607881	0.441716763	14	66084374	66124500	-	2484	Ephx2
201	ENSMUSG00000021290	924.0702369	1315.823734	532.3167395	0.404550188	-1.305609401	0.006117446	0.442312675	12	111961375	111966977	-	1217	Atp5mpl
202	ENSMUSG00000022332	428.6467368	224.8379416	632.455532	2.812939522	1.492078535	0.006192084	0.445492848	15	68928420	69101211	+	3662	Khdrbs3
203	ENSMUSG00000024066	1173.363126	1657.349722	689.3765299	0.415951154	-1.265513974	0.006227098	0.445804971	17	73883895	73950196	-	9175	Xdh
204	ENSMUSG00000037697	112.8933125	187.839293	37.94733192	0.202020202	-2.307428525	0.006290114	0.446018543	14	45588467	45658143	-	14076	Ddhd1
205	ENSMUSG00000034761	809.0687394	1156.44494	461.6925384	0.399234345	-1.324692258	0.006321554	0.446018543	12	69803750	69893200	-	8614	Map4k5
206	ENSMUSG00000031202	118.7435261	196.3774427	41.10960958	0.209339775	-2.256081645	0.006322768	0.446018543	X	75572046	75578231	-	3401	Rab39b
207	ENSMUSG00000028542	463.4317911	680.2059247	246.6576575	0.362622036	-1.463461496	0.006355025	0.446018543	4	117834506	117875198	+	5141	Slc6a9
208	ENSMUSG00000038540	66.61864937	15.17893277	118.058366	7.777777778	2.959358016	0.006383531	0.446018543	7	83584927	83625614	+	9027	Tmc3
209	ENSMUSG00000022037	12465.90935	17110.45196	7821.366746	0.45711047	-1.12938523	0.00641818	0.446293833	14	65968483	65981547	+	3437	Clu
210	ENSMUSG00000047407	638.7273827	921.1714824	356.283283	0.386771942	-1.370444956	0.006523194	0.44964966	17	70844205	70853546	-	5625	Tgif1
211	ENSMUSG00000049792	359.7090838	536.0060634	183.4121043	0.342182891	-1.547160468	0.006529636	0.44964966	12	111709488	111713257	-	2508	Bag5
212	ENSMUSG00000031327	98.2941306	166.0195772	30.56868405	0.184126984	-2.441227023	0.00655926	0.44964966	X	103356476	103396092	+	7375	Chic1
213	ENSMUSG00000035597	1248.678039	1753.166735	744.1893427	0.424482924	-1.236221575	0.007112383	0.485278193	12	65036333	65063386	+	11967	Prpf39
214	ENSMUSG00000021236	1036.594617	1462.869646	610.3195884	0.41720709	-1.261164418	0.007171134	0.487000417	12	84373857	84409029	-	6039	Entpd5
215	ENSMUSG00000039782	52.17758139	9.486832981	94.86832981	10	3.321928095	0.007434317	0.501686381	5	43233170	43289724	+	7816	Cpeb2
216	ENSMUSG00000039474	1222.852771	1715.219403	730.4861395	0.425884956	-1.231464327	0.007456427	0.501686381	5	36966104	36989205	-	3787	Wfs1
217	ENSMUSG00000023045	168.6021039	266.5800068	70.62420108	0.264926849	-1.916334036	0.007567022	0.505761344	15	102150526	102163469	+	2213	Soat2
218	ENSMUSG00000027737	8505.472813	11630.85723	5380.088392	0.462570237	-1.112255651	0.007586594	0.505761344	3	49892526	50443614	-	13922	Slc7a11
219	ENSMUSG00000061666	346.374813	178.35246	514.3971661	2.884160757	1.528151579	0.007652594	0.507831717	11	87033867	87074062	-	2336	Gdpd1
220	ENSMUSG00000021286	551.8174517	796.8939704	306.740933	0.384920635	-1.377367081	0.00772368	0.510219254	12	111814170	111832192	+	1919	Zfyve21
221	ENSMUSG00000038521	242.4412873	369.9864862	114.8960883	0.310541311	-1.687142896	0.007833812	0.515152914	6	124530345	124542359	-	3129	C1s1
222	ENSMUSG00000034881	203.5979767	92.02227991	315.1736735	3.424971363	1.776091925	0.008004454	0.524003302	10	81328731	81335172	+	1919	Tbxa2r
223	ENSMUSG00000035614	598.4083426	859.507068	337.3096171	0.392445426	-1.349436052	0.008043486	0.524197257	12	64965804	65022573	+	12476	Togaram1
224	ENSMUSG00000001123	72.20533991	18.97366596	125.4370139	6.611111111	2.724892762	0.008383175	0.543895915	11	78962974	78984946	-	2137	Lgals9
225	ENSMUSG00000057969	139.3510356	223.8892583	54.81281278	0.244821092	-2.030200238	0.008435073	0.544830769	9	107597674	107609229	-	4777	Sema3b
226	ENSMUSG00000030878	61.92793751	14.23024947	109.6256256	7.703703704	2.945552216	0.008569681	0.550559077	7	120957036	120982312	-	5684	Cdr2
227	ENSMUSG00000024427	43.90295485	6.640783086	81.16512661	12.22222222	3.611434712	0.008624069	0.550559077	18	38586268	38601268	-	4587	Spry4
228	ENSMUSG00000021822	318.8629974	474.341649	163.3843458	0.344444444	-1.537656786	0.00867365	0.550559077	14	20836660	20843385	+	2367	Plau
229	ENSMUSG00000071679	34.31071261	65.45914757	3.16227766	0.048309179	-4.371558863	0.008675293	0.550559077	X	144688907	145122411	+	3635	Rtl4
230	ENSMUSG00000052374	29.40918224	1.897366596	56.92099788	30	4.906890596	0.008806959	0.554350934	13	12269426	12340760	-	3795	Actn2
231	ENSMUSG00000048126	237.6978708	113.8419958	361.5537458	3.175925926	1.667177264	0.008826578	0.554350934	1	90765923	90843971	-	11963	Col6a3
232	ENSMUSG00000031099	1174.838855	1640.273422	709.4042884	0.432491485	-1.209256366	0.008849475	0.554350934	X	47809368	47892974	-	6118	Smarca1
233	ENSMUSG00000032473	21.34537421	42.69074841	0	0	-Inf	0.008951287	0.558322095	9	99689461	99717267	-	4456	Cldn18
234	ENSMUSG00000028347	287.0821069	429.753534	144.4106798	0.336031396	-1.573332064	0.009060102	0.561005536	4	48585174	48663131	+	2549	Tmeff1
235	ENSMUSG00000044147	1905.219586	2628.801419	1181.637752	0.449496772	-1.153617339	0.009071513	0.561005536	12	69372150	69373783	+	1534	Arf6
236	ENSMUSG00000040339	171.8697908	74.94598055	268.7936011	3.58649789	1.842575782	0.009386872	0.578048347	3	108970997	109027607	-	5702	Fam102b
237	ENSMUSG00000033350	140.7213559	56.92099788	224.5217139	3.944444444	1.979822118	0.009603361	0.588599152	9	95399292	95406722	-	7328	Chst2
238	ENSMUSG00000022836	392.9129993	573.9533953	211.8726032	0.369146006	-1.437736548	0.009639207	0.588599152	16	34745210	35002420	+	11263	Mylk
239	ENSMUSG00000007411	1843.76599	2539.625189	1147.906791	0.451998506	-1.145610091	0.009722537	0.591203489	12	111574523	111656221	+	9700	Mark3
240	ENSMUSG00000021177	230.3719275	350.064137	110.6797181	0.316169828	-1.661228395	0.009840582	0.595888266	12	99884517	99955219	+	7988	Tdp1
241	ENSMUSG00000024339	262.2055227	393.7035687	130.7074766	0.331994645	-1.590768122	0.010102878	0.609232875	17	34203527	34216321	+	3781	Tap2
242	ENSMUSG00000022353	1194.866614	1659.247088	730.4861395	0.440251572	-1.183599938	0.010217432	0.613594762	15	58941234	59082005	-	11345	Mtss1
243	ENSMUSG00000038742	213.2956282	325.3983712	101.1928851	0.310981535	-1.685099172	0.010591274	0.63342793	9	20873808	20879727	-	1582	Angptl6
244	ENSMUSG00000030022	28.35508969	1.897366596	54.81281278	28.88888889	4.852442812	0.010727323	0.638935173	6	92772699	92943492	-	15048	Adamts9
245	ENSMUSG00000053453	405.2985868	588.1836448	222.4135288	0.378136201	-1.403022123	0.010889505	0.639970732	14	13949012	13961852	-	6561	Thoc7
246	ENSMUSG00000040204	1211.257753	1677.272071	745.2434352	0.444318753	-1.170333061	0.010959665	0.639970732	9	65890237	65903266	+	4813	Pclaf
247	ENSMUSG00000055884	342.1057382	501.8534647	182.3580117	0.36336904	-1.460492591	0.010988144	0.639970732	12	65075603	65132058	+	10440	Fancm
248	ENSMUSG00000026858	2895.750358	1847.086381	3944.414335	2.135479085	1.094559768	0.011018482	0.639970732	2	30364233	30385521	+	6249	Miga2
249	ENSMUSG00000054555	1713.322036	1073.909493	2352.734579	2.190812721	1.131466162	0.011054447	0.639970732	7	133883199	134232146	-	10573	Adam12
250	ENSMUSG00000053617	270.6382631	137.5590782	403.7174479	2.9348659	1.553294585	0.011062361	0.639970732	19	47260174	47464411	-	10464	Sh3pxd2a
251	ENSMUSG00000034591	267.5813947	135.6617116	399.5010777	2.944832945	1.558185795	0.011074347	0.639970732	10	83230848	83337882	-	5349	Slc41a2
252	ENSMUSG00000050503	93.12907709	31.30654884	154.9516053	4.949494949	2.307281319	0.011139045	0.639970732	9	66508459	66514593	-	3935	Fbxl22
253	ENSMUSG00000025934	320.0752038	471.4955991	168.6548085	0.357701766	-1.483170853	0.01114103	0.639970732	1	21240589	21265661	+	4344	Gsta3
254	ENSMUSG00000025357	60.97925421	107.2012127	14.75729575	0.137659784	-2.860820947	0.011264938	0.642569391	10	128720134	128744855	-	4762	Dgka
255	ENSMUSG00000036875	733.1740755	435.4456338	1030.902517	2.367465505	1.243343405	0.011316156	0.642569391	10	62947026	62974185	+	5878	Dna2
256	ENSMUSG00000009739	215.298404	327.2957378	103.3010702	0.315619968	-1.663739614	0.011322042	0.642569391	15	100575318	100599984	-	6949	Pou6f1
257	ENSMUSG00000022092	316.1750614	465.8034993	166.5466234	0.357546956	-1.483795373	0.011363128	0.642569391	14	70217865	70289471	-	2985	Ppp3cc
258	ENSMUSG00000021115	406.827021	589.1323281	224.5217139	0.381105743	-1.391736745	0.011450145	0.64498044	12	106010228	106077426	+	5122	Vrk1
259	ENSMUSG00000025931	328.4552396	481.9311154	174.9793639	0.363079615	-1.461642162	0.011756153	0.659660905	1	20890606	20939650	+	5488	Paqr8
260	ENSMUSG00000033147	284.8158079	147.9945945	421.6370214	2.849002849	1.510457064	0.012125057	0.677744033	3	101855776	101924453	-	14239	Slc22a15
261	ENSMUSG00000030761	5939.969652	3867.781806	8012.157498	2.071512278	1.050684371	0.01220345	0.679366233	7	98051060	98119524	-	8566	Myo7a
262	ENSMUSG00000028497	97.18733342	34.15259873	160.2220681	4.691358025	2.230005605	0.012247571	0.679366233	4	88396144	88438928	-	6756	Hacd4
263	ENSMUSG00000037940	19.92234926	39.84469852	0	0	-Inf	0.012341661	0.680783955	8	81342556	82127914	+	13066	Inpp4b
264	ENSMUSG00000056973	284.2887616	147.9945945	420.5829288	2.841880342	1.506845811	0.012366818	0.680783955	8	93166068	93197838	-	2369	Ces1d
265	ENSMUSG00000028919	2501.361629	1603.274774	3399.448485	2.120315582	1.084279007	0.012437432	0.682087544	4	141239499	141257564	+	4242	Arhgef19
266	ENSMUSG00000033965	969.3962167	594.8244279	1343.968006	2.25943647	1.175962992	0.01266325	0.69186095	X	103697414	103821983	-	4263	Slc16a2
267	ENSMUSG00000030214	502.0642832	715.3072067	288.8213596	0.403772473	-1.308385537	0.01278006	0.695627734	6	136612070	136661928	-	2633	Plbd1
268	ENSMUSG00000020325	429.2791924	241.914241	616.6441437	2.549019608	1.349942471	0.012879825	0.698442171	10	79777272	79782630	+	2445	Fstl3
269	ENSMUSG00000004626	685.0020458	961.0161809	408.9879107	0.425578589	-1.232502523	0.013017867	0.703303556	8	3630955	3643644	+	4159	Stxbp2
270	ENSMUSG00000061578	52.07217214	11.38419958	92.7601447	8.148148148	3.026472211	0.013116043	0.704218132	5	117414000	117775003	+	13590	Ksr2
271	ENSMUSG00000041341	1604.750503	2193.355785	1016.145221	0.463283353	-1.110033253	0.013131708	0.704218132	12	105616136	105685211	-	13456	Atg2b
272	ENSMUSG00000001260	652.0089489	388.0114689	916.0064289	2.360771529	1.239258427	0.013203125	0.705444911	5	70751047	70842617	-	7869	Gabrg1
273	ENSMUSG00000037544	1022.522481	1412.589431	632.455532	0.447727782	-1.159306255	0.013379874	0.710665774	14	47387779	47418407	-	6805	Dlgap5
274	ENSMUSG00000033530	540.3805475	765.5874215	315.1736735	0.411675616	-1.280420096	0.013398639	0.710665774	12	100300770	100520826	-	7320	Ttc7b
275	ENSMUSG00000021258	775.8121193	1081.49896	470.1252788	0.434697856	-1.201915116	0.013511463	0.712238178	12	108179579	108203359	+	3042	Ccnk
276	ENSMUSG00000078866	1596.528581	1013.193762	2179.8634	2.15147732	1.105327632	0.013526301	0.712238178	2	177464733	177478129	+	2172	Zfp970
277	ENSMUSG00000028179	1251.734907	1717.116769	786.3530448	0.457949662	-1.126739068	0.013898687	0.72513804	3	157894248	157925077	-	2791	Cth
278	ENSMUSG00000037787	200.7519268	304.5273387	96.97651491	0.31844929	-1.650864438	0.013902343	0.72513804	12	111713261	111755053	+	4016	Apopt1
279	ENSMUSG00000035835	655.6982728	919.2741158	392.1224299	0.426556588	-1.229190951	0.013920974	0.72513804	10	79860475	79874634	-	4357	Plppr3
280	ENSMUSG00000006356	2636.390885	3565.151834	1707.629936	0.47897818	-1.06196816	0.014058389	0.725447808	12	113140236	113145506	+	2099	Crip2
281	ENSMUSG00000001729	4249.784948	5716.765554	2782.804341	0.486779511	-1.03865965	0.014151222	0.725447808	12	112653821	112674884	-	4098	Akt1
282	ENSMUSG00000036390	1080.075935	1486.586728	673.5651416	0.453095086	-1.14211425	0.014153555	0.725447808	6	67035096	67037457	-	1764	Gadd45a
283	ENSMUSG00000023206	176.7186166	82.53544693	270.9017862	3.282247765	1.714684147	0.01425492	0.725447808	2	11705290	11734317	+	4446	Il15ra
284	ENSMUSG00000046027	2319.530664	1498.919611	3140.141717	2.094936709	1.066906659	0.014302635	0.725447808	7	83631959	83653127	+	5460	Stard5
285	ENSMUSG00000042406	9564.203374	12799.63506	6328.771691	0.494449386	-1.016105248	0.014337221	0.725447808	15	80255184	80257541	+	2358	Atf4
286	ENSMUSG00000031901	255.1431025	378.5246359	131.7615692	0.348092453	-1.522457558	0.014362667	0.725447808	8	105991337	106053840	+	3367	Dus2
287	ENSMUSG00000002489	1126.245189	1547.302459	705.1879182	0.455753117	-1.133675573	0.014399946	0.725447808	16	89787111	90143769	-	10048	Tiam1
288	ENSMUSG00000028049	729.1158192	442.0864169	1016.145221	2.298521698	1.200706285	0.014433848	0.725447808	3	89177473	89182765	+	2270	Scamp3
289	ENSMUSG00000023905	986.3144022	612.8494105	1359.779394	2.21878225	1.149768089	0.014518958	0.725447808	17	23675445	23677468	-	1932	Tnfrsf12a
290	ENSMUSG00000020262	59.2400015	15.17893277	103.3010702	6.805555556	2.766712938	0.014538967	0.725447808	10	77290726	77418270	-	11272	Adarb1
291	ENSMUSG00000001175	4247.149716	5707.278721	2787.020711	0.488327423	-1.034079297	0.014575824	0.725447808	12	100199435	100209814	+	4706	Calm1
292	ENSMUSG00000032232	1115.915082	699.1795907	1532.650573	2.192069953	1.132293838	0.014575845	0.725447808	9	71626509	71771602	-	7844	Cgnl1
293	ENSMUSG00000079018	18.44661968	0	36.89323937	Inf	Inf	0.014867542	0.737440251	15	75044018	75048830	-	1677	Ly6c1
294	ENSMUSG00000033883	501.80076	293.1431391	710.458381	2.423588637	1.277144847	0.014927689	0.737905141	3	36151017	36170342	+	6800	D3Ertd254e
295	ENSMUSG00000003559	68.83224374	117.636729	20.02775851	0.170250896	-2.554265703	0.015084441	0.743126035	19	46707443	46741095	+	1751	As3mt
296	ENSMUSG00000006651	88.33295597	146.0972279	30.56868405	0.209235209	-2.256802452	0.015260968	0.749282578	7	30434982	30445535	-	3017	Aplp1
297	ENSMUSG00000053192	293.2485484	157.4814275	429.0156692	2.724230254	1.445848646	0.015331481	0.75021016	3	95219135	95232171	-	2385	Mllt11
298	ENSMUSG00000021192	1058.730561	1453.382813	664.0783086	0.45691906	-1.12998947	0.015419363	0.751978547	12	102469135	102497907	+	3447	Golga5
299	ENSMUSG00000022769	607.8424709	850.9689184	364.7160235	0.428589124	-1.222332854	0.015742134	0.763442808	16	17130138	17132383	-	1108	Sdf2l1
300	ENSMUSG00000041313	4006.026045	5370.49615	2641.555939	0.491864413	-1.023667416	0.015794913	0.763442808	5	148327410	148399904	-	11530	Slc7a1
301	ENSMUSG00000025403	2577.783339	3472.180871	1683.385808	0.484820886	-1.044476242	0.015812034	0.763442808	10	127517123	127522444	-	3109	Shmt2
302	ENSMUSG00000034892	673.6178462	938.2477818	408.9879107	0.435906078	-1.197910775	0.015993996	0.769671344	12	69157722	69159186	-	693	Rps29
303	ENSMUSG00000022114	362.6078384	521.7758139	203.4398628	0.38989899	-1.358827678	0.016111105	0.772407536	14	105891947	105896819	-	2087	Spry2
304	ENSMUSG00000001918	2148.451442	2899.176159	1397.726726	0.482111693	-1.052560674	0.016157152	0.772407536	7	16781340	16798274	+	4173	Slc1a5
305	ENSMUSG00000022070	517.1378067	728.5887729	305.6868405	0.419560185	-1.253050317	0.01632272	0.777764224	14	99046222	99074540	+	5153	Bora
306	ENSMUSG00000028572	539.2737503	320.6549547	757.8925459	2.363576594	1.240971618	0.016390573	0.778445099	4	95967240	96025413	+	8318	Hook1
307	ENSMUSG00000021067	360.1834255	517.9810807	202.3857703	0.390720391	-1.355791547	0.016513289	0.778904435	12	69965012	69987002	-	5265	Sav1
308	ENSMUSG00000019852	643.2599807	896.5057167	390.0142448	0.435038213	-1.200785965	0.016554674	0.778904435	10	18581839	18743949	-	14579	Arfgef3
309	ENSMUSG00000032348	4122.924909	5514.696012	2731.153806	0.49525011	-1.0137708	0.016700929	0.778904435	9	78182774	78209349	+	1266	Gsta4
310	ENSMUSG00000020962	504.9103331	711.5124735	298.3081926	0.419259259	-1.254085449	0.016738613	0.778904435	12	91555262	91590487	-	6241	Gtf2a1
311	ENSMUSG00000020982	1757.43581	2376.451662	1138.419958	0.479041916	-1.061776198	0.016758665	0.778904435	12	69310522	69357165	-	10549	Nemf
312	ENSMUSG00000072966	55.2344498	96.7656964	13.70320319	0.1416122	-2.81998253	0.016765092	0.778904435	X	135839034	135844730	+	4540	Gprasp2
313	ENSMUSG00000021271	181.7782608	276.0668397	87.48968193	0.316914853	-1.657832818	0.016775414	0.778904435	12	110850253	110869996	+	3749	Zfp839
314	ENSMUSG00000072662	267.2124623	142.3024947	392.1224299	2.755555556	1.462343214	0.01685546	0.779668777	6	147075060	147087032	-	1278	Mansc4
315	ENSMUSG00000059436	1487.008365	2016.900692	957.1160385	0.474547925	-1.075374301	0.016899172	0.779668777	12	76937269	76962201	-	3598	Max
316	ENSMUSG00000026034	1689.288726	2284.429382	1094.14807	0.478959025	-1.062025855	0.0170717	0.785136125	1	58410189	58424066	-	8132	Clk1
317	ENSMUSG00000032320	198.4856278	98.663063	298.3081926	3.023504274	1.596221618	0.017394858	0.794235134	9	56041845	56061882	+	4745	Rcn2
318	ENSMUSG00000021782	350.4330694	503.7508313	197.1153075	0.39129525	-1.353670497	0.0174071	0.794235134	14	24133953	24245920	-	8491	Dlg5
319	ENSMUSG00000024395	25.7198583	1.897366596	49.54235001	26.11111111	4.706591945	0.017557501	0.794235134	18	31931325	31958619	+	2623	Lims2
320	ENSMUSG00000015468	210.1860551	106.2525294	314.1195809	2.956349206	1.563816692	0.017570286	0.794235134	17	34564268	34588503	+	8061	Notch4
321	ENSMUSG00000023952	1615.291429	2183.868952	1046.713906	0.479293368	-1.061019117	0.017579598	0.794235134	17	46161032	46169370	+	5305	Gtpbp2
322	ENSMUSG00000027869	90.33573183	147.9945945	32.67686916	0.220797721	-2.179202815	0.017646996	0.794235134	3	98805504	98814443	-	1802	Hsd3b6
323	ENSMUSG00000050212	223.4149167	114.7906791	332.0391543	2.892561983	1.532347875	0.017652099	0.794235134	4	126147744	126149875	+	1942	Eva1b
324	ENSMUSG00000070531	177.087549	85.38149682	268.7936011	3.148148148	1.654503434	0.017736694	0.795578317	2	164613522	164618212	+	984	Wfdc6b
325	ENSMUSG00000021895	1197.132913	1627.940539	766.3252863	0.470732971	-1.08701919	0.018066971	0.807142147	14	27114899	27403911	+	4527	Arhgef3
326	ENSMUSG00000068600	47.38146027	10.43551628	84.32740427	8.080808081	3.01449957	0.018105576	0.807142147	15	74819071	74834871	+	1392	Gml2
327	ENSMUSG00000020668	219.5674789	326.3470545	112.7879032	0.345607235	-1.532794675	0.018413941	0.815090338	12	3365132	3406494	+	7406	Kif3c
328	ENSMUSG00000022262	78.63530448	26.56313235	130.7074766	4.920634921	2.298844482	0.018441419	0.815090338	15	28203752	28472052	+	15637	Dnah5
329	ENSMUSG00000015966	188.2082254	283.6563061	92.7601447	0.327015979	-1.612566962	0.018452124	0.815090338	14	29996135	30008896	-	3707	Il17rb
330	ENSMUSG00000028982	882.5389903	1209.571205	555.5067756	0.459259259	-1.122619287	0.01861713	0.818289172	4	149744036	149774277	-	1887	Slc25a33
331	ENSMUSG00000029651	108.2553052	43.63943171	172.8711788	3.961352657	1.985993142	0.018643966	0.818289172	5	147957320	148316065	+	12874	Mtus2
332	ENSMUSG00000015143	469.4401187	277.9642063	660.916031	2.377701934	1.249567872	0.018693457	0.818289172	12	80167547	80260371	-	5533	Actn1
333	ENSMUSG00000002602	1142.267395	1552.994559	731.5402321	0.471051381	-1.08604366	0.018756782	0.818595537	7	25757273	25788705	-	5033	Axl
334	ENSMUSG00000020680	1168.303482	1587.147158	749.4598055	0.472205619	-1.082512887	0.018845272	0.819995037	11	83473086	83506743	+	2919	Taf15
335	ENSMUSG00000028133	28.30238506	2.846049894	53.75872022	18.88888889	4.239465935	0.019029764	0.822782721	3	121155398	121171695	-	5065	Rwdd3
336	ENSMUSG00000006218	17.39252713	0	34.78505426	Inf	Inf	0.019063735	0.822782721	4	141368220	141384175	+	1433	Fam131c
337	ENSMUSG00000006360	47.48686953	84.43281353	10.54092553	0.124843945	-3.001802243	0.019079184	0.822782721	12	113146316	113153879	+	2280	Crip1
338	ENSMUSG00000028518	847.332299	1160.239674	534.4249246	0.460615972	-1.118363658	0.019724635	0.848100928	4	105029874	105109890	-	7969	Prkaa2
340	ENSMUSG00000028078	441.4012567	260.887907	621.9146065	2.383838384	1.253286429	0.019893143	0.848866385	3	86786151	86920852	-	10553	Dclk2
341	ENSMUSG00000029669	1232.761241	796.8939704	1668.628512	2.093915344	1.066203116	0.019917666	0.848866385	6	21771395	21852515	-	3311	Tspan12
342	ENSMUSG00000000154	86.96263565	142.3024947	31.6227766	0.222222222	-2.169925001	0.019986757	0.848974446	7	143473736	143499334	+	1699	Slc22a18
343	ENSMUSG00000002885	256.8823553	138.5077615	375.256949	2.709284627	1.437911966	0.020037035	0.848974446	8	83723251	83741326	-	3757	Adgre5
344	ENSMUSG00000054150	301.0488332	434.4969505	167.600716	0.38573508	-1.374317739	0.020227199	0.853870734	12	104929933	105009809	-	5548	Syne3
345	ENSMUSG00000022024	1023.681983	1391.718398	655.6455682	0.471105052	-1.085879292	0.020296833	0.853870734	14	79587691	79635196	+	7792	Sugt1
346	ENSMUSG00000023883	1366.947223	1844.240331	889.6541151	0.482395976	-1.051710221	0.020364132	0.853870734	17	14945009	14961273	-	4914	Phf10
347	ENSMUSG00000021176	187.7865884	281.7589395	93.81423725	0.332959222	-1.586582596	0.020412154	0.853870734	12	99693045	99884439	-	5309	Efcab11
348	ENSMUSG00000022034	1086.558604	1474.253845	698.8633629	0.474045474	-1.076902635	0.020446365	0.853870734	14	65819038	65833994	-	6648	Esco2
350	ENSMUSG00000074207	619.1212612	856.6610181	381.5815043	0.445428818	-1.166733197	0.020597173	0.855253465	3	138260991	138290698	+	2233	Adh1
351	ENSMUSG00000030792	37.31487639	68.30519746	6.32455532	0.092592593	-3.432959407	0.020764705	0.859753435	7	45207519	45212147	-	1576	Dkkl1
353	ENSMUSG00000020451	1407.898719	1894.520546	921.2768917	0.486284983	-1.040126054	0.021398505	0.880865457	11	3344256	3409189	-	6099	Limk2
357	ENSMUSG00000021076	1609.810148	2159.203186	1060.417109	0.491115017	-1.025867159	0.021638269	0.880865457	12	70937857	70964718	+	9726	Actr10
358	ENSMUSG00000022358	441.506666	619.4901936	263.5231383	0.425387102	-1.233151803	0.022015815	0.893731411	15	58175879	58214932	-	6976	Fbxo32
359	ENSMUSG00000025277	962.0702735	1305.388218	618.7523288	0.473998708	-1.077044968	0.022311745	0.900826402	14	8002902	8056763	+	2365	Abhd6
361	ENSMUSG00000025314	21.87242048	42.69074841	1.054092553	0.024691358	-5.339850003	0.022444052	0.903544052	2	90429754	90580647	-	8352	Ptprj
362	ENSMUSG00000061119	753.3599479	1030.270062	476.4498341	0.462451402	-1.112626332	0.022540256	0.904910317	7	92874470	92934583	+	5497	Prcp
363	ENSMUSG00000020948	516.1891234	717.2045733	315.1736735	0.439447384	-1.186237657	0.022824559	0.913799757	12	64938833	64965534	-	7257	Klhl28
364	ENSMUSG00000025324	74.4716389	25.61444905	123.3288287	4.814814815	2.267480311	0.022983953	0.917653285	7	58656166	58829420	+	5587	Atp10a
365	ENSMUSG00000078942	378.7354544	535.0573801	222.4135288	0.415681639	-1.26644907	0.023131925	0.921030862	13	100281121	100317674	-	6827	Naip6
366	ENSMUSG00000033712	1052.564119	1422.076264	683.0519746	0.480320213	-1.057931572	0.023219968	0.922010371	14	70138164	70153811	-	4658	Ccar2
367	ENSMUSG00000021127	603.151759	831.0465691	375.256949	0.451547438	-1.147050535	0.023391998	0.923989669	12	80107754	80113013	-	2990	Zfp36l1
368	ENSMUSG00000022574	212.3996495	313.0654884	111.7338107	0.356902357	-1.486398666	0.023462791	0.923989669	15	75890956	75894481	-	2344	Naprt
370	ENSMUSG00000034209	109.6783302	46.4854816	172.8711788	3.718820862	1.894845254	0.023577411	0.923989669	11	5058128	5060385	+	1413	Rasl10a
371	ENSMUSG00000000094	17.07629936	34.15259873	0	0	-Inf	0.023587708	0.923989669	11	85886422	85916097	+	3401	Tbx4
372	ENSMUSG00000021965	327.7173748	466.7521826	188.6825671	0.404245709	-1.306695635	0.023786069	0.929114895	14	57806561	57826185	-	2705	Ska3
373	ENSMUSG00000056501	1314.98046	1764.550934	865.4099863	0.490442055	-1.027845401	0.023846409	0.929114895	2	167688915	167690418	+	1504	Cebpb
374	ENSMUSG00000032826	596.510976	371.8838528	821.1380991	2.208049887	1.142772767	0.024076601	0.935575516	3	126921612	127499350	-	35004	Ank2
375	ENSMUSG00000025545	793.3100557	1079.601593	507.0185182	0.469634837	-1.090388665	0.02422062	0.938662042	14	122181704	122402234	+	1444	Clybl
376	ENSMUSG00000068854	212.9794004	112.8933125	313.0654884	2.773109244	1.471504451	0.024475924	0.946033529	3	96221119	96223738	+	2620	Hist2h2be
377	ENSMUSG00000001995	393.8616826	234.3247746	553.3985905	2.361673414	1.239809474	0.024626744	0.947061125	8	125418063	125569808	-	9617	Sipa1l2
378	ENSMUSG00000021276	484.8825746	673.5651416	296.2000075	0.439749609	-1.185245801	0.024660938	0.947061125	12	110872610	110889145	-	3873	Cinp
379	ENSMUSG00000026958	1088.350561	711.5124735	1465.188649	2.059259259	1.042125476	0.024698009	0.947061125	2	25352276	25356359	-	3337	Dpp7
380	ENSMUSG00000073700	851.2851461	548.3389463	1154.231346	2.104959631	1.073792565	0.024879411	0.949406462	4	152008803	152017680	+	3986	Klhl21
381	ENSMUSG00000021235	461.323606	642.2585928	280.3886192	0.436566552	-1.195726495	0.024889827	0.949406462	12	84361657	84373796	+	3142	Coq6
383	ENSMUSG00000029596	94.86832981	151.7893277	37.94733192	0.25	-2	0.025146261	0.954179155	5	120458186	120472810	-	1497	Sdsl
387	ENSMUSG00000021453	278.4912526	157.4814275	399.5010777	2.536813922	1.3430177	0.025942977	0.974235884	13	51846678	51848468	+	1173	Gadd45g
388	ENSMUSG00000020886	326.3470545	462.9574494	189.7366596	0.409836066	-1.286881148	0.026077305	0.976756372	11	70016942	70047522	+	13251	Dlg4
391	ENSMUSG00000048078	1133.044086	1519.790643	746.2975278	0.491052851	-1.026049789	0.026336333	0.978889857	7	96171246	96911093	+	21021	Tenm4
392	ENSMUSG00000049882	231.6368386	336.7825708	126.4911064	0.375586854	-1.412781525	0.026712182	0.987961453	12	69577628	69583028	-	1027	Vcpkmt
393	ENSMUSG00000044250	267.7922132	150.8406444	384.743782	2.550663871	1.350872792	0.026716359	0.987961453	15	97247107	97385680	+	2197	Pced1b
394	ENSMUSG00000000037	455.0517553	631.8230765	278.2804341	0.44044044	-1.182981154	0.026860125	0.989516804	X	161117193	161258213	+	6079	Scml2
395	ENSMUSG00000039713	446.039264	272.2721065	619.8064214	2.276422764	1.186768512	0.026894594	0.989516804	4	152072498	152115400	+	4945	Plekhg5
397	ENSMUSG00000026207	15.8113883	0	31.6227766	Inf	Inf	0.027731893	1	1	75375297	75432320	+	12741	Speg
398	ENSMUSG00000039062	15.8113883	0	31.6227766	Inf	Inf	0.027731893	1	7	79821803	79861059	-	4135	Anpep
400	ENSMUSG00000022346	444.3000113	616.6441437	271.9558788	0.441025641	-1.181065559	0.02787947	1	15	61985391	61990374	+	2717	Myc
402	ENSMUSG00000033318	888.4946133	1197.238322	579.7509044	0.484240183	-1.046205293	0.027921523	1	10	75831114	75837424	-	4156	Gstt2
403	ENSMUSG00000027932	703.8175979	451.5732499	956.0619459	2.117180205	1.082144071	0.027924619	1	3	90385239	90389938	-	2569	Slc27a3
404	ENSMUSG00000072825	668.3473835	909.7872828	426.9074841	0.46923879	-1.091605814	0.027975959	1	12	112720455	112746592	+	8002	Cep170b
405	ENSMUSG00000079036	283.7090107	405.0877683	162.3302532	0.400728597	-1.319302625	0.027995042	1	12	87425840	87444017	-	6574	Alkbh1
406	ENSMUSG00000003762	200.2775851	294.0918224	106.4633479	0.362007168	-1.465909829	0.028153176	1	7	27233023	27257950	+	5586	Coq8b
407	ENSMUSG00000022816	83.58953948	32.25523213	134.9238468	4.183006536	2.064540252	0.028229555	1	16	37776873	37836514	+	4914	Fstl1
408	ENSMUSG00000021541	808.9106255	1092.883159	524.9380916	0.480324074	-1.057919976	0.028230799	1	13	56773113	56895993	-	3879	Trpc7
409	ENSMUSG00000056459	215.9835642	314.962855	117.0042734	0.371485944	-1.428620472	0.028332674	1	12	76347782	76369602	-	3131	Zbtb25
410	ENSMUSG00000021240	177.7200045	263.7339569	91.70605214	0.347721823	-1.523994483	0.0284197	1	12	84601464	84617413	-	8006	Abcd4
411	ENSMUSG00000056531	618.7523288	844.3281353	393.1765224	0.465667915	-1.102626612	0.028457875	1	5	108132875	108233628	+	6433	Ccdc18
413	ENSMUSG00000059743	842.7997011	549.2876296	1136.311773	2.068700825	1.048725018	0.028597388	1	3	89093588	89101959	-	4208	Fdps
414	ENSMUSG00000041205	392.2805437	547.390263	237.1708245	0.433275563	-1.206643224	0.028911653	1	16	20233303	20241358	-	3280	Map6d1
415	ENSMUSG00000039354	432.0725376	599.5678444	264.5772309	0.441279887	-1.180234101	0.028931401	1	1	72583251	72633134	+	5728	Smarcal1
416	ENSMUSG00000028654	16.12761607	32.25523213	0	0	-Inf	0.029317866	1	4	122995652	123002485	+	4038	Mycl
418	ENSMUSG00000048485	630.6108701	858.5583847	402.6633554	0.468999386	-1.09234206	0.029407693	1	4	129425765	129440853	-	6489	Zbtb8b
419	ENSMUSG00000074595	239.7533513	133.764345	345.7423575	2.584712372	1.370003746	0.02954038	1	2	164579519	164585447	-	867	Wfdc6a
422	ENSMUSG00000020652	455.2098692	628.9770266	281.4427118	0.447461036	-1.160166035	0.029845823	1	12	4196004	4234294	-	7263	Cenpo
423	ENSMUSG00000070337	80.26914794	129.9696118	30.56868405	0.235198702	-2.088047994	0.029870143	1	11	97332109	97352077	-	9542	Gpr179
424	ENSMUSG00000026833	50.8599657	14.23024947	87.48968193	6.148148148	2.620151929	0.029871841	1	2	28192992	28230736	+	3553	Olfm1
425	ENSMUSG00000021738	730.4334349	987.5793133	473.2875565	0.479240047	-1.061179625	0.030170226	1	14	13961440	14107302	+	7978	Atxn7
426	ENSMUSG00000031026	39.31765224	70.20256406	8.432740427	0.12012012	-3.057450272	0.03021673	1	7	109449006	109508134	-	10125	Trim66
429	ENSMUSG00000030688	55.86690533	94.86832981	16.86548085	0.177777778	-2.491853096	0.03056611	1	7	101317086	101346626	+	2419	Stard10
430	ENSMUSG00000116673	240.2276929	134.7130283	345.7423575	2.566510172	1.359807979	0.030631936	1	16	98001310	98082450	-	4251	A630089N07Rik
432	ENSMUSG00000038235	161.9613208	82.53544693	241.3871947	2.924648787	1.548263386	0.030777339	1	1	171437535	171464603	+	2663	F11r
434	ENSMUSG00000085925	135.609007	205.8642757	65.35373831	0.317460317	-1.655351829	0.031053522	1	12	109589193	109600330	-	6358	Rtl1
435	ENSMUSG00000021189	346.6910408	485.7258486	207.656233	0.427517361	-1.225945087	0.031167766	1	12	101918901	101958246	-	5407	Atxn3
437	ENSMUSG00000026749	709.4042884	958.170131	460.6384458	0.480748075	-1.056647015	0.03162841	1	2	38511643	38594606	+	10714	Nek6
438	ENSMUSG00000019558	69.25388076	24.66576575	113.8419958	4.615384615	2.206450877	0.031645861	1	X	73673150	73682502	+	5210	Slc6a8
439	ENSMUSG00000041476	59.29270613	99.6117463	18.97366596	0.19047619	-2.392317423	0.031955067	1	X	157698910	157752591	+	2275	Smpx
440	ENSMUSG00000017412	316.3331753	187.839293	444.8270575	2.368125701	1.243745662	0.032503888	1	2	52428320	52676831	-	8963	Cacnb4
442	ENSMUSG00000028328	103.4064795	45.53679831	161.2761607	3.541666667	1.824428435	0.032748593	1	4	46038935	46116032	+	3946	Tmod1
443	ENSMUSG00000022755	169.9724242	251.401074	88.54377448	0.352201258	-1.505528033	0.032848566	1	16	56724609	56795855	-	2698	Adgrg7
446	ENSMUSG00000004105	197.4842399	107.2012127	287.7672671	2.684365782	1.424581272	0.033197514	1	2	33216069	33247717	+	6286	Angptl2
447	ENSMUSG00000021277	718.3640751	967.656964	469.0711863	0.484749455	-1.044688818	0.033220518	1	12	111166370	111267153	+	7350	Traf3
448	ENSMUSG00000042851	274.0640639	388.9601522	159.1679756	0.409214092	-1.289072267	0.03329867	1	2	128967402	129018563	+	5668	Zc3h6
450	ENSMUSG00000038463	442.6661678	276.0668397	609.2654959	2.206949217	1.142053433	0.03331028	1	1	170644532	170682789	+	3095	Olfml2b
451	ENSMUSG00000026131	710.5110856	463.9061327	957.1160385	2.063167462	1.044860926	0.033394165	1	1	33908225	34308661	+	41155	Dst
453	ENSMUSG00000046719	174.6104315	92.02227991	257.198583	2.794959908	1.482827589	0.033496011	1	11	95509845	95514570	-	2099	Nxph3
455	ENSMUSG00000002804	211.7144893	306.4247053	117.0042734	0.381836945	-1.388971395	0.033918751	1	12	112934291	112942124	-	1587	Nudt14
458	ENSMUSG00000022514	563.096242	764.6387382	361.5537458	0.47284257	-1.080568169	0.03463823	1	16	26581704	26730117	+	11360	Il1rap
459	ENSMUSG00000039637	785.3516569	1052.089778	518.6135363	0.49293658	-1.020526051	0.034934518	1	16	4626133	4679777	-	7423	Coro7
461	ENSMUSG00000055653	46.64359549	80.63808033	12.64911064	0.156862745	-2.672425342	0.035008429	1	X	52272426	52613950	-	2690	Gpc3
463	ENSMUSG00000014158	56.39395161	94.86832981	17.91957341	0.188888889	-2.404390255	0.035284436	1	5	114622152	114658421	-	4076	Trpv4
466	ENSMUSG00000037594	71.0458381	115.7393624	26.35231383	0.227686703	-2.134878054	0.035592833	1	12	112808937	112816252	+	1960	Clba1
467	ENSMUSG00000019528	160.3274774	83.48413023	237.1708245	2.840909091	1.506352666	0.036019693	1	3	20122084	20155317	-	2344	Gyg
469	ENSMUSG00000027082	173.0292926	92.02227991	254.0363054	2.760595647	1.464979587	0.036157121	1	2	84432855	84476775	-	5463	Tfpi
471	ENSMUSG00000032400	653.1684507	879.4294173	426.9074841	0.485436893	-1.042644337	0.036326573	1	9	64137144	64173104	-	4283	Zwilch
472	ENSMUSG00000030847	565.2571318	365.2430697	765.2711938	2.095238095	1.067114196	0.036645292	1	7	128523616	128546981	+	2562	Bag3
477	ENSMUSG00000034442	232.427408	332.0391543	132.8156617	0.4	-1.321928095	0.03749183	1	12	73280011	73286710	-	2139	Trmt5
478	ENSMUSG00000079105	45.16786591	12.33288287	78.00284895	6.324786325	2.661016741	0.037632543	1	15	4988762	5063740	-	2676	C7
481	ENSMUSG00000022425	325.8200083	453.4706165	198.1694	0.437006044	-1.194274863	0.038574868	1	15	54838901	54952892	-	5779	Enpp2
484	ENSMUSG00000051379	26.6685416	3.794733192	49.54235001	13.05555556	3.706591945	0.038727761	1	2	140650914	140671469	-	4865	Flrt3
485	ENSMUSG00000022911	681.8397682	913.582016	450.0975203	0.492673359	-1.021296635	0.038862259	1	16	62793685	62847040	-	5087	Arl13b
486	ENSMUSG00000046152	160.2747727	236.2221412	84.32740427	0.35698349	-1.486070744	0.038865943	1	8	31187331	31261738	+	5007	Fut10
487	ENSMUSG00000010529	22.39946676	42.69074841	2.108185107	0.049382716	-4.339850003	0.038907171	1	12	111484609	111485823	-	1215	Gm266
488	ENSMUSG00000003585	53.49519708	90.12491331	16.86548085	0.187134503	-2.417852515	0.039037175	1	11	4097039	4123415	-	3505	Sec14l2
490	ENSMUSG00000002803	103.8808211	160.3274774	47.4341649	0.295857988	-1.757023247	0.039448077	1	12	112976482	112978945	+	2324	Btbd6
491	ENSMUSG00000021792	495.4762047	672.6164583	318.3359511	0.47328005	-1.079233984	0.039466309	1	14	40993740	41013788	-	2948	Fam213a
492	ENSMUSG00000020974	253.6146683	358.6022867	148.62705	0.414462081	-1.270687978	0.039986264	1	12	69201773	69228195	-	2881	Pole2
494	ENSMUSG00000002100	128.2303591	63.56178097	192.8989373	3.034825871	1.601613741	0.040205709	1	2	91118144	91136516	+	4163	Mybpc3
496	ENSMUSG00000040852	151.4730999	223.8892583	79.0569415	0.353107345	-1.501821265	0.040783545	1	17	84511895	84622142	+	6886	Plekhh2
499	ENSMUSG00000023345	216.299792	309.2707552	123.3288287	0.398773006	-1.326360341	0.041128327	1	9	106281061	106350521	+	3336	Poc1a
500	ENSMUSG00000060044	88.22754672	138.5077615	37.94733192	0.273972603	-1.867896464	0.04135675	1	10	68723646	68782650	+	5282	Tmem26
501	ENSMUSG00000031337	644.1032547	862.3531179	425.8533916	0.49382716	-1.017921908	0.041363458	1	X	71210767	71315691	+	13935	Mtm1
505	ENSMUSG00000027574	169.867015	92.02227991	247.71175	2.691867125	1.428607198	0.042102092	1	2	180934772	180954699	-	1239	Nkain4
506	ENSMUSG00000038954	209.4481904	299.7839222	119.1124585	0.397327707	-1.331598692	0.042384672	1	17	44777152	45119290	+	4121	Supt3
509	ENSMUSG00000027293	250.5577999	147.9945945	353.1210054	2.386039886	1.25461816	0.04294385	1	2	120089175	120154606	-	4007	Ehd4
511	ENSMUSG00000043391	75.26220831	30.35786554	120.1665511	3.958333333	1.984893108	0.043060369	1	16	21649045	21694665	-	6564	2510009E07Rik
513	ENSMUSG00000024039	457.2653497	620.4388769	294.0918224	0.474006116	-1.07702242	0.043182112	1	17	31612623	31637199	-	3343	Cbs
514	ENSMUSG00000024325	375.6258814	515.1350308	236.116732	0.458358911	-1.125450372	0.043272782	1	17	34020792	34024680	-	3243	Ring1
515	ENSMUSG00000073551	131.2345229	66.40783086	196.0612149	2.952380952	1.561878888	0.04333829	1	18	62607539	62741387	-	796	Spink13
518	ENSMUSG00000033373	308.2693672	427.8561674	188.6825671	0.440995319	-1.181164753	0.043612757	1	12	76765589	76921412	+	3987	Fntb
519	ENSMUSG00000036023	529.1017572	712.4611568	345.7423575	0.485278887	-1.043113999	0.043659064	1	14	50807841	50821301	+	3628	Parp2
520	ENSMUSG00000040964	42.05829288	11.38419958	72.73238618	6.388888889	2.67556505	0.043723611	1	4	140514485	140666012	-	5693	Arhgef10l
521	ENSMUSG00000039485	318.5994743	441.1377336	196.0612149	0.444444444	-1.169925001	0.043786146	1	10	34297442	34301320	+	3879	Tspyl4
522	ENSMUSG00000032860	50.75455645	16.12761607	85.38149682	5.294117647	2.404390255	0.044191363	1	7	100996568	101012866	-	3927	P2ry2
524	ENSMUSG00000028444	229.6340628	325.3983712	133.8697543	0.411402656	-1.281376986	0.04428927	1	4	41657498	41697089	-	2782	Cntfr
526	ENSMUSG00000079057	302.8934952	420.266701	185.5202894	0.441434663	-1.179728176	0.044837331	1	8	45304944	45333216	-	3808	Cyp4v3
527	ENSMUSG00000052688	190.6326383	107.2012127	274.0640639	2.55653884	1.354191944	0.044925067	1	1	131688695	131715439	+	4624	Rab7b
530	ENSMUSG00000037617	325.5564851	202.0695425	449.0434277	2.222222222	1.152003093	0.04560841	1	15	36178099	36235621	+	11167	Spag1
532	ENSMUSG00000025766	611.4263856	406.9851349	815.8676363	2.004662005	1.003359012	0.0460703	1	3	41742611	41803320	+	5813	D3Ertd751e
533	ENSMUSG00000039765	276.3830675	385.165419	167.600716	0.435139573	-1.200449868	0.046486261	1	5	43662346	43740972	+	6809	Cc2d2a
534	ENSMUSG00000042099	222.3081195	314.962855	129.6533841	0.411646586	-1.280521833	0.046535381	1	17	33810520	33822918	+	3118	Kank3
536	ENSMUSG00000019853	229.6867674	324.4496879	134.9238468	0.415854451	-1.265849421	0.046827164	1	10	18539498	18546076	-	3930	Hebp2
537	ENSMUSG00000045193	516.4526465	693.4874909	339.4178022	0.489436085	-1.030807624	0.047165542	1	10	80165985	80172786	+	2604	Cirbp
539	ENSMUSG00000027896	164.1749152	90.12491331	238.2249171	2.643274854	1.402326448	0.048438553	1	3	107291230	107312115	+	3879	Slc16a4
540	ENSMUSG00000010406	337.4150263	462.9574494	211.8726032	0.457650273	-1.127682553	0.048450916	1	14	54426909	54429756	+	1109	Mrpl52
542	ENSMUSG00000021287	279.3872313	388.0114689	170.7629936	0.4400978	-1.184103937	0.048793956	1	12	111803192	111813873	-	2750	Xrcc3
547	ENSMUSG00000052131	199.7505389	284.6049894	114.8960883	0.403703704	-1.308631272	0.049258616	1	6	34412334	34423142	+	1281	Akr1b7
548	ENSMUSG00000030276	120.4827789	60.71573108	180.2498266	2.96875	1.569855608	0.049281128	1	6	113389260	113414587	+	5041	Ttll3
550	ENSMUSG00000069670	144.3579752	76.84334714	211.8726032	2.757201646	1.463204782	0.049390731	1	10	31689310	32890462	-	4710	Nkain2
551	ENSMUSG00000033847	41.00420033	11.38419958	70.62420108	6.203703704	2.633129783	0.049500542	1	7	13324655	13360672	+	3747	Pla2g4c
