# Supplementary material for: Deletion of Meg8-DMR Enhances Migration and Invasion of MLTC-1 Depending on the CTCF Binding Sites
Source: Int J Mol Sci. 2022 Aug 8;23(15):8828. doi: 10.3390/ijms23158828 (PMC9369160; doi:10.3390/ijms23158828)
Supplement: Supplementary file 1 [file ijms-23-08828-s001.zip › Table S3_MLTC-1_vs_CTCFBS-KO.txt.csv]

	id	baseMean	baseMeanA	baseMeanB	foldChange	log2FoldChange	pval	padj	Chromosome	Start.Site	End.Site	Direction	Length	Name
1	ENSMUSG00000037936	1572.518086	110.3296129	3034.706559	27.50582078	4.781665049	3.65202e-27	5.32172e-23	5	125277087	125341094	-	8500	Scarb1
2	ENSMUSG00000029288	271.2327109	0	542.4654218	Inf	Inf	1.27156e-22	9.26459e-19	5	88455991	88468531	+	1919	Ambn
3	ENSMUSG00000032420	1148.929733	139.3637216	2158.495745	15.48821831	3.953099288	3.06723e-19	1.48986e-15	9	88327197	88372092	+	8602	Nt5e
4	ENSMUSG00000039196	536.4064842	1034.582072	38.23089639	0.036952986	-4.758165259	1.33517e-18	4.86401e-15	4	63344560	63348163	+	775	Orm1
5	ENSMUSG00000057880	679.6325636	68.71405716	1290.55107	18.78147097	4.231238155	9.24598e-18	2.69465e-14	16	8513429	8621568	+	7748	Abat
6	ENSMUSG00000084883	249.3403604	494.5476509	4.13306988	0.008357273	-6.902751968	2.19789e-17	5.33793e-14	12	108203602	108275425	-	4337	Ccdc85c
7	ENSMUSG00000058070	183.4049759	0	366.8099519	Inf	Inf	5.28107e-17	1.09937e-13	12	108370957	108539617	+	7436	Eml1
8	ENSMUSG00000027869	1014.212179	150.977365	1877.446993	12.43528785	3.636367998	1.84231e-16	3.35577e-13	3	98805504	98814443	-	1802	Hsd3b6
9	ENSMUSG00000029231	228.5414254	9.67803622	447.4048145	46.22888408	5.530722633	8.33785e-14	1.34999e-10	5	75152292	75198215	+	10024	Pdgfra
10	ENSMUSG00000020262	255.209988	15.48485795	494.9351181	31.96252233	4.998309358	2.56222e-13	3.73367e-10	10	77290726	77418270	-	11272	Adarb1
11	ENSMUSG00000041550	1470.111374	358.0873402	2582.135408	7.210909513	2.850181238	1.4955e-12	1.98113e-09	12	104101113	104106137	+	2162	Serpina5
12	ENSMUSG00000042115	364.2710159	44.51896661	684.0230651	15.36475613	3.941552963	3.476e-12	4.22102e-09	1	132298626	132307357	+	4269	Klhdc8a
13	ENSMUSG00000050335	793.7095495	1415.896699	171.5224	0.121140476	-3.04524711	1.00987e-11	1.0541e-08	14	47367751	47386160	+	1858	Lgals3
14	ENSMUSG00000048764	114.1760554	0	228.3521109	Inf	Inf	1.01272e-11	1.0541e-08	5	86521898	86632424	-	6807	Tmprss11f
15	ENSMUSG00000038677	242.6471188	20.32387606	464.9703615	22.87803567	4.515891281	1.66093e-11	1.61354e-08	17	28142141	28174854	+	8844	Scube3
16	ENSMUSG00000032715	2598.953464	4390.925033	806.9818941	0.183784029	-2.443916694	6.89833e-11	6.28265e-08	2	152337422	152344032	-	2125	Trib3
17	ENSMUSG00000027358	123.4099988	1.935607244	244.8843904	126.5155373	6.983170762	9.50085e-11	8.14391e-08	2	133552159	133562885	+	3555	Bmp2
18	ENSMUSG00000036437	272.1536285	33.87312677	510.4341302	15.06899949	3.913511727	2.57448e-10	2.08419e-07	8	66697192	66706792	+	3454	Npy1r
19	ENSMUSG00000027966	1150.23105	330.0210351	1970.441065	5.970652945	2.577888712	3.58224e-10	2.74739e-07	3	114030540	114220718	+	12744	Col11a1
20	ENSMUSG00000035914	154.2116314	7.742428976	300.6808338	38.83546555	5.279302856	3.84289e-10	2.79993e-07	9	58524298	58555437	-	3658	Cd276
21	ENSMUSG00000027737	7264.001338	11865.27241	2662.73027	0.22441375	-2.155767024	9.17589e-10	6.36719e-07	3	49892526	50443614	-	13922	Slc7a11
22	ENSMUSG00000037234	8684.185827	3266.337224	14102.03443	4.317384722	2.110157657	1.60381e-09	1.0623e-06	8	26021421	26119224	-	28486	Hook3
23	ENSMUSG00000030717	1565.204731	2617.908798	512.5006651	0.195767196	-2.352789056	1.86558e-09	1.18196e-06	7	126623249	126630861	-	2514	Nupr1
24	ENSMUSG00000076441	2913.799265	4766.432839	1061.165692	0.222633094	-2.16726003	3.7211e-09	2.25933e-06	2	31470207	31520672	+	2414	Ass1
25	ENSMUSG00000012819	155.1139711	11.61364346	298.6142988	25.71237009	4.684390694	5.25e-09	3.06012e-06	10	60302748	60696490	-	16939	Cdh23
26	ENSMUSG00000021831	13229.14918	21195.86713	5262.431225	0.248276289	-2.00998161	5.98589e-09	3.35486e-06	14	45283087	45318771	-	5285	Ero1l
27	ENSMUSG00000052512	181.7498019	18.38826882	345.111335	18.76801663	4.230204292	6.66793e-09	3.59871e-06	7	48908716	49610090	+	32228	Nav2
28	ENSMUSG00000061751	119.1460012	5.806821732	232.4851808	40.03656242	5.323246203	1.60085e-08	8.33126e-06	16	33969073	34573532	-	24050	Kalrn
29	ENSMUSG00000026674	544.7478181	940.7051206	148.7905157	0.158169135	-2.660459989	2.15875e-08	1.08474e-05	1	169972307	170110762	-	9264	Ddr2
30	ENSMUSG00000038119	370.9332914	91.94134409	649.9252386	7.068911653	2.821488111	9.18621e-08	4.46205e-05	9	35421128	35507652	+	7715	Cdon
31	ENSMUSG00000010175	745.4219788	246.7899236	1244.054034	5.040943389	2.333693753	9.55401e-08	4.491e-05	1	190118035	190170714	-	8390	Prox1
32	ENSMUSG00000053846	1706.607563	2744.691072	668.5240531	0.243569872	-2.037592403	1.04287e-07	4.74895e-05	18	74939322	74961263	-	3787	Lipg
33	ENSMUSG00000028179	1071.14983	1751.724556	390.5751037	0.222966049	-2.165104045	1.16336e-07	5.13709e-05	3	157894248	157925077	-	2791	Cth
34	ENSMUSG00000020256	2364.528247	3760.884875	968.1716194	0.257431868	-1.957737435	1.26475e-07	5.42055e-05	10	83487450	83534140	-	7503	Aldh1l2
35	ENSMUSG00000031980	62980.03577	28556.01367	97404.05786	3.410982323	1.770187279	1.6674e-07	6.94208e-05	8	124556534	124569706	-	1891	Agt
36	ENSMUSG00000032324	117.4979043	8.710232598	226.2855759	25.9792805	4.699289571	1.80008e-07	7.28632e-05	9	56131725	56165477	-	4274	Tspan3
37	ENSMUSG00000035458	412.5444234	114.2008274	710.8880194	6.224893773	2.638049218	2.09253e-07	8.15232e-05	7	4518305	4524229	-	2063	Tnni3
38	ENSMUSG00000037492	74.36252592	0.967803622	147.7572482	152.672758	7.254298849	2.12591e-07	8.15232e-05	8	23636019	24156585	+	8310	Zmat4
39	ENSMUSG00000038539	3986.175213	6237.494344	1734.856082	0.278133492	-1.846150616	2.27156e-07	8.48746e-05	7	44812256	44816658	-	1993	Atf5
40	ENSMUSG00000040856	450.8310578	769.4038795	132.2582362	0.171897023	-2.540383538	2.84998e-07	0.000103825	12	109452823	109463336	+	5657	Dlk1
41	ENSMUSG00000039004	249.3164713	52.26139559	446.371547	8.541133317	3.094427513	3.28594e-07	0.000116787	13	38345107	38500302	+	3900	Bmp6
42	ENSMUSG00000029752	2983.947333	4662.877851	1305.016815	0.279873687	-1.837152242	4.08234e-07	0.000141638	6	7675169	7693254	-	2735	Asns
43	ENSMUSG00000016024	602.6152202	1001.676749	203.5536916	0.203212955	-2.29893572	4.83441e-07	0.00016383	2	158306493	158332852	+	4831	Lbp
44	ENSMUSG00000006205	203.8270478	37.74434126	369.9097543	9.800402972	3.292841071	5.48315e-07	0.000181592	7	130936111	130985660	+	2879	Htra1
45	ENSMUSG00000027313	423.084995	719.0780912	127.0918988	0.176742833	-2.500276383	6.4128e-07	0.000207661	2	119351229	119354381	+	1637	Chac1
46	ENSMUSG00000010796	59.92951326	0	119.8590265	Inf	Inf	7.04422e-07	0.000223149	6	18050964	18109061	-	2829	Asz1
47	ENSMUSG00000025888	59.51992276	119.0398455	0	0	-Inf	1.03736e-06	0.000316003	9	5298517	5307265	+	1497	Casp1
48	ENSMUSG00000027122	1573.214322	2472.738254	673.6903904	0.27244711	-1.875951909	1.05104e-06	0.000316003	2	106962527	106974424	-	5313	Arl14ep
49	ENSMUSG00000005125	366.2977464	626.1689435	106.4265494	0.169964593	-2.556693862	1.06282e-06	0.000316003	15	66929318	66969640	-	6596	Ndrg1
50	ENSMUSG00000026456	2381.638201	3697.97764	1065.298762	0.288076042	-1.795478412	1.08428e-06	0.000316003	1	134405559	134411740	+	4437	Cyb5r1
51	ENSMUSG00000022755	137.0167534	256.4679598	17.56554699	0.06849022	-3.867958196	1.22997e-06	0.000351434	16	56724609	56795855	-	2698	Adgrg7
52	ENSMUSG00000028883	131.6611016	246.7899236	16.53227952	0.066989281	-3.899925924	1.57903e-06	0.000437158	5	13125414	13602565	+	13868	Sema3a
53	ENSMUSG00000049521	64.54648495	0.967803622	128.1251663	132.3875664	7.048623823	1.58999e-06	0.000437158	15	78842624	78850897	+	2560	Cdc42ep1
54	ENSMUSG00000037129	283.1780973	74.5208789	491.8353157	6.599966654	2.722458735	1.77303e-06	0.000478456	9	45319100	45347581	+	3245	Tmprss13
55	ENSMUSG00000059898	1919.480108	865.2164381	2973.743779	3.436994083	1.781147368	2.03932e-06	0.000530835	18	19960930	20002351	-	5403	Dsc3
56	ENSMUSG00000013878	1719.781707	766.5004687	2673.062945	3.487359831	1.802135231	2.03999e-06	0.000530835	8	26119368	26151790	+	6237	Rnf170
57	ENSMUSG00000003585	320.8198191	91.94134409	549.698294	5.978793322	2.57985434	2.1465e-06	0.000548752	11	4097039	4123415	-	3505	Sec14l2
58	ENSMUSG00000031714	396.1359945	125.8144709	666.4575182	5.297145182	2.40521505	2.21498e-06	0.000556496	8	80764438	80880519	-	5082	Gab1
59	ENSMUSG00000041000	974.0562933	406.4775213	1541.635065	3.792669913	1.923213815	2.81379e-06	0.000694959	4	128883580	128911328	+	5015	Trim62
60	ENSMUSG00000041565	120.9825298	226.4660476	15.49901205	0.068438568	-3.869046611	4.05039e-06	0.000983704	17	68273797	68780086	+	6080	L3mbtl4
61	ENSMUSG00000000037	385.3079218	644.5572123	126.0586313	0.195573999	-2.354213517	4.19966e-06	0.000997952	X	161117193	161258213	+	6079	Scml2
62	ENSMUSG00000031530	116.784879	14.51705433	219.0527036	15.08933553	3.915457372	4.24602e-06	0.000997952	8	34807297	34819894	+	2740	Dusp4
63	ENSMUSG00000063713	1470.421003	669.7201064	2271.121899	3.391150836	1.761774956	4.90873e-06	0.001135396	7	44188236	44192455	+	878	Klk1b24
64	ENSMUSG00000020467	1494.27994	2301.437013	687.1228676	0.298562534	-1.743894957	5.85527e-06	0.001333172	11	28853204	28926743	+	2037	Efemp1
65	ENSMUSG00000024140	1272.625476	575.8431551	1969.407798	3.420042038	1.774014058	6.30146e-06	0.001412691	17	86753907	86833410	+	5309	Epas1
66	ENSMUSG00000034361	119.3025838	16.45266157	222.1525061	13.50252693	3.755157521	6.79266e-06	0.001499737	8	94532990	94570531	+	3200	Cpne2
67	ENSMUSG00000039485	262.211971	450.0286842	74.39525784	0.165312258	-2.596734392	7.98976e-06	0.001737713	10	34297442	34301320	+	3879	Tspyl4
68	ENSMUSG00000036957	49.35798472	98.71596945	0	0	-Inf	9.72574e-06	0.002030037	7	30355489	30362772	-	2886	Lrfn3
69	ENSMUSG00000041798	138.6728104	24.19509055	253.1505302	10.46288831	3.387209262	9.72645e-06	0.002030037	11	5900820	5950081	-	3033	Gck
70	ENSMUSG00000015766	237.5250141	64.84284268	410.2071856	6.326175236	2.661333519	9.75175e-06	0.002030037	6	137477245	137654876	-	12355	Eps8
71	ENSMUSG00000054263	3234.835796	1628.813496	4840.858097	2.972014972	1.571441384	1.12205e-05	0.00230288	15	7090614	7197489	+	10776	Lifr
72	ENSMUSG00000009376	474.5962096	769.4038795	179.7885398	0.233672515	-2.097440042	1.19216e-05	0.002412806	6	17463800	17573980	+	7679	Met
73	ENSMUSG00000031555	5045.57689	2608.230761	7482.923018	2.868965096	1.520530417	1.34158e-05	0.002673843	8	24949611	25016927	-	4115	Adam9
74	ENSMUSG00000052981	81.9156404	6.774625354	157.0566554	23.18307614	4.535000104	1.35784e-05	0.002673843	13	69702832	69739889	-	2674	Ube2ql1
75	ENSMUSG00000026840	61.52099385	120.9754528	2.06653494	0.017082267	-5.871356772	1.40927e-05	0.00273812	2	31887291	31946539	+	6091	Lamc3
76	ENSMUSG00000049100	87.36418137	166.462223	8.26613976	0.049657752	-4.331837242	1.52094e-05	0.002899202	3	45378398	45435623	+	15888	Pcdh10
77	ENSMUSG00000028804	129.438867	22.25948331	236.6182506	10.62999744	3.410069345	1.53197e-05	0.002899202	4	127987857	128567656	+	17077	Csmd2
78	ENSMUSG00000001995	582.9442076	239.0474946	926.8409206	3.877224992	1.955024456	1.61207e-05	0.003011676	8	125418063	125569808	-	9617	Sipa1l2
79	ENSMUSG00000027082	46.93847567	93.87695134	0	0	-Inf	1.67318e-05	0.00308628	2	84432855	84476775	-	5463	Tfpi
80	ENSMUSG00000029279	360.6616614	594.2314239	127.0918988	0.213876099	-2.225152827	1.75769e-05	0.003201628	5	107331159	107387058	+	5115	Brdt
81	ENSMUSG00000073491	46.45457386	92.90914772	0	0	-Inf	1.8658e-05	0.003317854	1	173566283	173599274	-	6840	Ifi213
82	ENSMUSG00000025408	3290.983471	4887.408291	1694.558651	0.346719273	-1.52816006	1.86703e-05	0.003317854	10	127290774	127296288	+	1713	Ddit3
83	ENSMUSG00000019838	227.0437214	390.0248597	64.06258314	0.164252564	-2.606012205	1.97422e-05	0.003466072	10	40033532	40142258	-	7356	Slc16a10
84	ENSMUSG00000040990	275.51971	87.10232598	463.937094	5.326345638	2.413146051	2.02342e-05	0.003510158	X	159627272	159978069	+	10100	Sh3kbp1
85	ENSMUSG00000037254	44.94713495	0	89.89426989	Inf	Inf	2.08346e-05	0.003571786	2	10094593	10131396	-	3315	Itih2
86	ENSMUSG00000087651	373.0767909	135.4925071	610.6610748	4.506973027	2.172158816	2.16515e-05	0.003651722	10	83722865	83762762	+	3465	1500009L16Rik
87	ENSMUSG00000024087	181.3826737	44.51896661	318.2463808	7.148557232	2.837652097	2.18021e-05	0.003651722	17	79706953	79715041	-	5128	Cyp1b1
88	ENSMUSG00000069806	255.6655817	78.39209338	432.9390699	5.522738981	2.465383943	2.23793e-05	0.003705816	7	3332955	3368221	+	2441	Cacng7
89	ENSMUSG00000036856	67.03145785	3.871214488	130.1917012	33.63071243	5.071707436	2.27025e-05	0.003717085	4	137277489	137299726	+	4194	Wnt4
90	ENSMUSG00000037296	1234.322039	593.2636203	1875.380458	3.161124994	1.660438082	2.38727e-05	0.003865252	8	25785288	25803975	+	3093	Lsm1
91	ENSMUSG00000006930	299.7944185	102.5871839	497.0016531	4.844675855	2.276400142	3.25787e-05	0.005185327	11	100347327	100356128	-	3766	Hap1
92	ENSMUSG00000014773	309.4467998	107.426202	511.4673977	4.76110472	2.251296361	3.27374e-05	0.005185327	17	15367354	15376872	-	4219	Dll1
93	ENSMUSG00000031654	192.4867605	52.26139559	332.7121253	6.366307704	2.670456889	3.78913e-05	0.005906137	8	87468405	87472609	-	3037	Cbln1
94	ENSMUSG00000015994	1732.902789	882.6369033	2583.168675	2.9266493	1.549249878	3.80989e-05	0.005906137	8	25998722	26015650	-	3012	Fnta
95	ENSMUSG00000034771	1469.679669	737.46636	2201.892979	2.985753789	1.578095203	3.85824e-05	0.005918139	10	81574561	81590845	+	6221	Tle2
96	ENSMUSG00000029096	403.7103447	650.364034	157.0566554	0.241490377	-2.049962397	3.92616e-05	0.005959587	5	35652023	35679782	-	4439	Htra3
97	ENSMUSG00000034801	1854.554125	2754.369108	954.7391423	0.34662716	-1.528543392	4.26136e-05	0.00640171	12	69583762	69681852	-	8514	Sos2
98	ENSMUSG00000024143	746.3650196	1150.718507	342.0115326	0.297215636	-1.75041808	4.30841e-05	0.006406349	17	86963082	87000069	+	4151	Rhoq
99	ENSMUSG00000066516	666.6432964	300.0191228	1033.26747	3.44400537	1.784087392	4.59994e-05	0.006770736	7	44102328	44106583	+	871	Klk1b21
100	ENSMUSG00000051727	177.18414	46.45457386	307.9137061	6.628275334	2.728633532	4.68517e-05	0.006827233	7	97451323	97459557	+	2568	Kctd14
101	ENSMUSG00000037251	1031.229248	503.2578835	1559.200612	3.098213984	1.63143679	5.14831e-05	0.007427844	8	25980604	25994133	-	3613	Pomk
102	ENSMUSG00000021096	2758.723328	4035.741104	1481.705552	0.367145839	-1.445574847	6.03215e-05	0.008530364	12	72757455	72799819	+	12829	Ppm1a
103	ENSMUSG00000037852	9972.132516	5573.581059	14370.68397	2.578357401	1.366452258	6.0571e-05	0.008530364	8	64592542	64693054	-	2609	Cpe
104	ENSMUSG00000001260	235.6301034	395.8316814	75.42852531	0.19055707	-2.391704961	6.09331e-05	0.008530364	5	70751047	70842617	-	7869	Gabrg1
105	ENSMUSG00000040412	1629.302686	844.892562	2413.71281	2.856828097	1.514414228	6.2334e-05	0.008530364	3	108455694	108536536	-	6304	5330417C22Rik
106	ENSMUSG00000055653	41.13165394	82.26330787	0	0	-Inf	6.24875e-05	0.008530364	X	52272426	52613950	-	2690	Gpc3
107	ENSMUSG00000040147	360.5705426	581.6499768	139.4911085	0.239819675	-2.059978071	6.26372e-05	0.008530364	X	16709282	16817366	-	2789	Maob
108	ENSMUSG00000026825	200.5237768	59.03602094	342.0115326	5.793268704	2.534377582	6.45168e-05	0.008704995	2	32308471	32353338	-	5249	Dnm1
109	ENSMUSG00000021990	487.3811207	208.0777787	766.6844627	3.684605187	1.88151004	6.5587e-05	0.008768195	14	60634001	60764556	+	9102	Spata13
110	ENSMUSG00000031556	1676.851567	874.8944743	2478.808661	2.833265878	1.502465993	6.72175e-05	0.008904481	8	25017211	25023260	+	1802	Tm2d2
111	ENSMUSG00000028893	1536.978303	2276.274119	797.6824868	0.350433404	-1.512787795	7.11966e-05	0.009346644	4	132492032	132510501	-	3475	Sesn2
112	ENSMUSG00000040584	227.3383087	381.3146271	73.36199037	0.19239228	-2.377877187	8.14488e-05	0.010475704	5	8660077	8748575	+	5480	Abcb1a
113	ENSMUSG00000021069	1438.594076	2130.135772	747.0523808	0.350706462	-1.51166408	8.19283e-05	0.010475704	12	70190811	70231488	-	6895	Pygl
114	ENSMUSG00000072662	365.5165994	145.1705433	585.8626555	4.035685492	2.012813747	8.19538e-05	0.010475704	6	147075060	147087032	-	1278	Mansc4
115	ENSMUSG00000037260	2752.938602	1502.999025	4002.878179	2.663260662	1.413193637	8.65964e-05	0.010972898	8	25944453	25976753	-	3305	Hgsnat
116	ENSMUSG00000037855	157.0929282	273.888425	40.29743133	0.14713083	-2.764828511	8.73943e-05	0.010978538	10	67886103	67912662	-	5205	Zfp365
117	ENSMUSG00000026628	236.2122009	393.8960742	78.52832772	0.199363063	-2.326529958	9.03247e-05	0.011249669	1	191170296	191218039	-	2154	Atf3
118	ENSMUSG00000023000	156.7151821	40.64775213	272.7826121	6.710890463	2.746504209	9.34539e-05	0.011540766	15	98891152	98898540	-	4399	Dhh
119	ENSMUSG00000063659	1502.876053	2215.302491	790.4496146	0.3568134	-1.486758297	9.7502e-05	0.011939487	1	177442351	177450764	+	6138	Zbtb18
120	ENSMUSG00000059479	104.628064	190.6573135	18.59881446	0.097551015	-3.357699305	9.88957e-05	0.012008374	7	25626654	25635100	+	6474	B3gnt8
121	ENSMUSG00000001918	2024.885792	2957.607869	1092.163716	0.369272657	-1.437241654	9.9935e-05	0.012008374	7	16781340	16798274	+	4173	Slc1a5
122	ENSMUSG00000027412	290.8417958	474.2237748	107.4598169	0.226601496	-2.141770708	0.000100537	0.012008374	2	160880670	160906002	+	3694	Lpin3
123	ENSMUSG00000042155	981.9269966	494.5476509	1469.306342	2.97101066	1.570953781	0.000106114	0.012571475	2	69821944	69836651	+	4925	Klhl23
124	ENSMUSG00000031490	1208.913223	1787.53329	630.2931567	0.352604989	-1.503875206	0.000126876	0.014909966	8	27260329	27276674	+	2196	Eif4ebp1
125	ENSMUSG00000031575	8280.139334	4764.497231	11795.78144	2.475766249	1.307875108	0.000129528	0.015099893	8	25815996	25847694	-	8969	Ash2l
126	ENSMUSG00000027577	103.1887423	19.35607244	187.0214121	9.662157064	3.272345305	0.000141574	0.016373172	2	181018380	181043546	-	5022	Chrna4
127	ENSMUSG00000050503	132.7279839	31.93751953	233.5184482	7.311727763	2.870212356	0.000146251	0.016780898	9	66508459	66514593	-	3935	Fbxl22
128	ENSMUSG00000020142	1449.672508	2123.361147	775.98387	0.365450725	-1.4522512	0.000148342	0.016887825	11	20302180	20332713	-	3926	Slc1a4
129	ENSMUSG00000086962	74.81546621	140.3315252	9.29940723	0.066267414	-3.915556576	0.000170574	0.019268205	11	58063552	58093134	-	1462	Gm12248
130	ENSMUSG00000099032	589.7701427	281.630854	897.9094314	3.188249507	1.672764537	0.000186437	0.020898135	1	9960163	9967932	-	4193	Tcf24
131	ENSMUSG00000005686	237.8381793	86.13452236	389.5418362	4.522482107	2.177114795	0.000212785	0.02366952	7	110768206	110812405	+	5627	Ampd3
132	ENSMUSG00000039601	41.29796688	0.967803622	81.62813013	84.3436915	6.398208261	0.000220082	0.024295739	17	43801351	44039516	+	4372	Rcan2
133	ENSMUSG00000002980	138.0898299	240.0152983	36.16436145	0.150675235	-2.730485781	0.000224838	0.024634088	7	19756131	19771016	-	3199	Bcam
134	ENSMUSG00000078452	67.41716389	7.742428976	127.0918988	16.41499059	4.036942018	0.000237344	0.02578809	10	22360552	22374139	+	1441	Raet1d
135	ENSMUSG00000045672	540.4749685	257.4357635	823.5141736	3.198911303	1.677580991	0.00023891	0.02578809	4	63214004	63334991	+	13022	Col27a1
136	ENSMUSG00000037060	282.2624909	452.9320951	111.5928868	0.246378846	-2.021049705	0.000257987	0.027642572	7	105480083	105482300	-	1662	Cavin3
137	ENSMUSG00000009739	201.0439513	333.8922496	68.19565302	0.204244492	-2.29163092	0.000260587	0.027717333	15	100575318	100599984	-	6949	Pou6f1
138	ENSMUSG00000028211	753.579314	1120.716594	386.4420338	0.344816911	-1.536097565	0.000293307	0.030971477	4	11156431	11174379	+	6475	Trp53inp1
139	ENSMUSG00000040690	249.3934359	95.81255858	402.9743133	4.205861103	2.072401206	0.000321312	0.033684624	4	130047840	130099283	+	6750	Col16a1
140	ENSMUSG00000040713	648.6097767	970.7070329	326.5125205	0.336365669	-1.57189763	0.000327426	0.03408034	1	165763746	165775308	+	2362	Creg1
141	ENSMUSG00000044147	1873.541299	2681.783837	1065.298762	0.397235134	-1.331934865	0.000331575	0.034267408	12	69372150	69373783	+	1534	Arf6
142	ENSMUSG00000005237	229.0881377	85.16671874	373.0095567	4.379757283	2.130850921	0.000335867	0.03446654	11	69420809	69549110	-	14968	Dnah2
143	ENSMUSG00000041361	303.625824	126.7822745	480.4693736	3.789720412	1.922091417	0.000351709	0.03583985	9	71504347	71592360	-	5635	Myzap
144	ENSMUSG00000024640	1719.748989	2463.060218	976.4377592	0.39643276	-1.334851909	0.000362675	0.036700722	19	15904678	15947337	-	4254	Psat1
145	ENSMUSG00000061462	266.5989318	106.4583984	426.7394651	4.008509159	2.003065771	0.000365439	0.036725351	11	58994256	59136402	-	28898	Obscn
146	ENSMUSG00000028766	523.440214	791.6633628	255.2170651	0.322380796	-1.633162289	0.000382007	0.03812739	4	137741733	137796384	-	4033	Alpl
147	ENSMUSG00000051236	1449.462836	815.8584534	2083.06722	2.553221347	1.352318615	0.000394769	0.039043226	10	120781096	120899101	-	4048	Msrb3
148	ENSMUSG00000021226	1246.685873	1801.082541	692.2892049	0.384373947	-1.379417542	0.000396541	0.039043226	12	83987861	83993873	+	2196	Acot2
149	ENSMUSG00000032232	1277.27695	713.2712694	1841.282632	2.581461935	1.368188325	0.000419838	0.041023865	9	71626509	71771602	-	7844	Cgnl1
150	ENSMUSG00000002985	6760.230348	9438.020922	4082.439774	0.432552524	-1.209052767	0.000422288	0.041023865	7	19696109	19699188	-	2138	Apoe
151	ENSMUSG00000033595	591.076771	884.5725105	297.5810314	0.336412253	-1.571697841	0.000429248	0.041423865	14	70530685	70538324	+	3899	Lgi3
152	ENSMUSG00000028059	4631.599371	6477.509642	2785.689099	0.43005557	-1.217405005	0.000466446	0.04471743	3	88605966	88648052	+	9844	Arhgef2
153	ENSMUSG00000064137	76.5529115	12.58144709	140.5243759	11.16917434	3.481450636	0.00046994	0.044757926	X	37874778	37878944	-	1204	Rhox8
154	ENSMUSG00000031558	287.8799982	454.8677024	120.892294	0.265774627	-1.911724714	0.000477075	0.045142488	5	47983138	48307733	+	25433	Slit2
155	ENSMUSG00000074923	454.989778	218.7236186	691.2559374	3.16040829	1.660110951	0.00048453	0.045552078	2	118663303	118698020	+	5211	Pak6
156	ENSMUSG00000032224	118.811605	30.96971591	206.653494	6.672760404	2.738283702	0.000488315	0.04561363	9	70088511	70142560	-	4397	Fam81a
157	ENSMUSG00000039629	260.9159607	106.4583984	415.3735229	3.901744992	1.96411949	0.000509649	0.04730321	6	29917012	29959681	+	8329	Strip2
158	ENSMUSG00000036580	2660.180748	3741.528803	1578.832694	0.421975288	-1.244769582	0.00053397	0.049246948	3	55112108	55137322	+	7683	Spg20
159	ENSMUSG00000025934	307.1449519	480.9984002	133.2915036	0.277114235	-1.851447273	0.000540905	0.049572722	1	21240589	21265661	+	4344	Gsta3
160	ENSMUSG00000041324	1865.421998	1088.779075	2642.064921	2.426630877	1.278954672	0.000559361	0.050943769	13	16011851	16031621	+	6390	Inhba
161	ENSMUSG00000028572	630.0790748	327.1176242	933.0405254	2.852308944	1.512130254	0.000573789	0.05193322	4	95967240	96025413	+	8318	Hook1
162	ENSMUSG00000021823	997.4127466	1442.027397	552.7980965	0.383347846	-1.383274021	0.000585101	0.052630221	14	20929398	21033676	+	8191	Vcl
163	ENSMUSG00000098188	617.9089887	320.3429989	915.4749784	2.857796117	1.514902994	0.000591539	0.052882892	10	59221953	59226434	+	4482	Sowahc
164	ENSMUSG00000058952	37.29317137	73.55307527	1.03326747	0.014047917	-6.153500001	0.00063648	0.056553586	3	129835884	129875332	+	2220	Cfi
165	ENSMUSG00000037242	4293.306889	5970.380544	2616.233234	0.43820209	-1.190331729	0.000645637	0.056677074	4	135213969	135272814	-	6572	Clic4
166	ENSMUSG00000026728	4854.664834	6740.752227	2968.577441	0.440392606	-1.183137847	0.000648498	0.056677074	2	13573927	13582826	+	4743	Vim
167	ENSMUSG00000039840	2444.434852	3429.896036	1458.973668	0.425369647	-1.233211003	0.000649538	0.056677074	18	77938467	78035027	+	9672	Epg5
168	ENSMUSG00000032359	7583.916105	4682.233923	10485.59829	2.239443492	1.163140263	0.000656297	0.056925959	9	90054152	90076089	+	4499	Ctsh
169	ENSMUSG00000001552	172.5928231	60.00382457	285.1818217	4.75272741	2.248755659	0.000670538	0.05781708	11	100368958	100397763	-	6436	Jup
170	ENSMUSG00000074604	132.8651057	226.4660476	39.26416386	0.173377706	-2.528009693	0.000675274	0.057882881	3	51660360	51682677	+	3703	Mgst2
171	ENSMUSG00000030352	80.58778561	15.48485795	145.6907133	9.408592169	3.233978865	0.000726597	0.061917971	6	127961396	128143594	-	4975	Tspan9
172	ENSMUSG00000042717	335.7738892	153.8807759	517.6670025	3.364078453	1.750211351	0.00073765	0.062074497	6	14713977	14755274	-	6965	Ppp1r3a
173	ENSMUSG00000049387	30.48581409	60.97162819	0	0	-Inf	0.000741871	0.062074497	5	71442824	71548205	-	542	Cox7b2
174	ENSMUSG00000053552	116.7123381	31.93751953	201.4871567	6.308791654	2.657363707	0.000742011	0.062074497	2	130295169	130370481	+	3236	Ebf4
175	ENSMUSG00000029174	93.82387118	21.29167968	166.3560627	7.813195818	2.965912772	0.000748823	0.062074497	5	64156305	64351486	+	7405	Tbc1d1
176	ENSMUSG00000038146	232.8319653	371.6365909	94.02733977	0.253008832	-1.982740348	0.000749733	0.062074497	17	32120820	32166880	-	8044	Notch3
177	ENSMUSG00000031026	36.32536775	71.61746803	1.03326747	0.01442759	-6.115025853	0.000782187	0.064395668	7	109449006	109508134	-	10125	Trim66
178	ENSMUSG00000029446	766.2076472	1113.941969	418.4733254	0.375668874	-1.412466508	0.000801415	0.065607954	5	129765558	129787449	-	4329	Psph
179	ENSMUSG00000021266	1621.862818	2286.919959	956.8056772	0.418381795	-1.257108018	0.00082667	0.06729741	12	108860030	108894174	-	3447	Wars
180	ENSMUSG00000023809	130.9162273	39.6799485	222.1525061	5.598608729	2.485068358	0.000847608	0.068618541	17	7170115	7303315	+	9978	Rps6ka2
181	ENSMUSG00000053398	4313.848388	5958.766901	2668.929875	0.447899695	-1.158752412	0.000886462	0.071367532	3	98313170	98339990	-	2486	Phgdh
182	ENSMUSG00000026131	305.8569061	473.2559712	138.457841	0.292564383	-1.773173952	0.000904224	0.072016209	1	33908225	34308661	+	41155	Dst
183	ENSMUSG00000031770	2938.588832	4079.292267	1797.885398	0.440734637	-1.182017812	0.00091213	0.072016209	8	94386438	94395377	+	2333	Herpud1
184	ENSMUSG00000021281	722.8714535	1051.034734	394.7081735	0.375542464	-1.412952047	0.000912204	0.072016209	12	111442469	111455018	+	4984	Tnfaip2
185	ENSMUSG00000021703	615.5805983	328.0854279	903.0757688	2.752562876	1.460775519	0.000915392	0.072016209	13	92611091	92711947	+	6679	Serinc5
186	ENSMUSG00000037035	49.94981268	4.83901811	95.06060724	19.64460663	4.296061374	0.00091923	0.072016209	1	119415465	119422248	-	4255	Inhbb
187	ENSMUSG00000028542	465.2667238	693.915197	236.6182506	0.340990155	-1.552198008	0.00100422	0.078253941	4	117834506	117875198	+	5141	Slc6a9
188	ENSMUSG00000023045	165.4245318	271.9528178	58.89624579	0.216567882	-2.207108793	0.001018884	0.078974383	15	102150526	102163469	+	2213	Soat2
189	ENSMUSG00000040618	3169.127793	4381.246997	1957.008588	0.446678443	-1.162691463	0.001039935	0.080179512	14	55540266	55551242	+	7806	Pck2
190	ENSMUSG00000041132	1156.058229	1639.459336	672.657123	0.410292045	-1.285276914	0.001058401	0.081173801	5	150571644	150597188	-	3813	N4bp2l1
191	ENSMUSG00000010755	1861.825036	2600.488332	1123.16174	0.431904164	-1.211216868	0.001068981	0.081555964	7	143557230	143600090	-	6583	Cars
192	ENSMUSG00000026142	1637.616608	2294.662388	980.570829	0.427326841	-1.226588158	0.00108161	0.082089689	1	82316452	82445366	+	6966	Rhbdd1
193	ENSMUSG00000027546	682.5368666	991.030909	374.0428241	0.37742801	-1.4057266	0.001103698	0.083332025	2	168634438	168742409	-	5917	Atp9a
194	ENSMUSG00000096001	50.00554615	94.84475496	5.16633735	0.054471513	-4.198354237	0.001164552	0.087473497	14	37102140	37114022	-	828	2610528A11Rik
195	ENSMUSG00000047963	153.6472287	253.564549	53.72990844	0.211898346	-2.238555771	0.001220141	0.091152563	5	92603041	92606579	+	2221	Stbd1
196	ENSMUSG00000045312	1741.559955	2429.187091	1053.932819	0.43386235	-1.204690699	0.001226043	0.091152563	13	94057796	94195409	+	8415	Lhfpl2
197	ENSMUSG00000030551	1647.26899	2299.501406	995.0365736	0.432718402	-1.20849962	0.001265762	0.093619863	7	70351944	70366735	-	8625	Nr2f2
198	ENSMUSG00000030450	992.1260903	574.8753515	1409.376829	2.4516216	1.293736321	0.001272079	0.093619863	7	56239760	56536518	+	3961	Oca2
199	ENSMUSG00000053617	301.1010421	140.3315252	461.8705591	3.291281545	1.718649444	0.00132158	0.096774199	19	47260174	47464411	-	10464	Sh3pxd2a
200	ENSMUSG00000070047	5173.652521	3281.822082	7065.48296	2.152914687	1.106291151	0.001359802	0.099075204	8	44935447	45052257	+	15655	Fat1
201	ENSMUSG00000025092	2989.099493	1867.860991	4110.337996	2.20055883	1.137869941	0.001375598	0.09972742	19	58795751	58860984	-	5733	Hspa12a
202	ENSMUSG00000003452	361.297722	544.8734392	177.7220048	0.326171166	-1.616298845	0.001399774	0.10051542	6	149408886	149563329	+	27373	Bicd1
203	ENSMUSG00000048118	764.2136531	1096.521504	431.9058025	0.393887216	-1.344145501	0.001400263	0.10051542	12	71015990	71098592	+	5615	Arid4a
204	ENSMUSG00000037979	47.366644	4.83901811	89.89426989	18.57696496	4.215442914	0.001439417	0.102819566	5	124834418	124862424	-	2729	Ccdc92
205	ENSMUSG00000037851	2886.687488	3964.123636	1809.25134	0.456406385	-1.131609119	0.001500171	0.106319829	13	49682100	49734267	+	5272	Iars
206	ENSMUSG00000029314	124.1548731	209.0455824	39.26416386	0.187825848	-2.412532476	0.001503012	0.106319829	5	100845713	100899102	+	3502	Gpat3
207	ENSMUSG00000027556	74.38818079	15.48485795	133.2915036	8.607860921	3.105654768	0.001612626	0.113522669	3	14766216	14808368	-	1248	Car1
208	ENSMUSG00000042406	9652.370796	13057.60647	6247.135124	0.47842881	-1.063623827	0.001683366	0.117932771	15	80255184	80257541	+	2358	Atf4
209	ENSMUSG00000000247	711.7045516	403.5741104	1019.834993	2.527007969	1.337430214	0.001702347	0.118691861	2	38339281	38369733	+	4393	Lhx2
210	ENSMUSG00000047746	94.72621095	25.16289417	164.2895277	6.52903941	2.70687075	0.00171965	0.119327362	16	36963460	36990467	-	5517	Fbxo40
211	ENSMUSG00000025176	40.7459479	78.39209338	3.09980241	0.039542284	-4.660459989	0.001784796	0.123260899	19	42045610	42070953	+	2259	Hoga1
212	ENSMUSG00000024713	364.8814262	545.8412428	183.9216097	0.336950738	-1.569390409	0.001836821	0.126191533	19	17432832	17837632	-	9346	Pcsk5
213	ENSMUSG00000001687	3917.618594	2505.643577	5329.59361	2.127035808	1.088844321	0.001846342	0.126191533	5	148504635	148552789	-	8098	Ubl3
214	ENSMUSG00000038777	259.4571782	119.0398455	399.8745109	3.359165237	1.748102763	0.001853211	0.126191533	3	95160457	95174024	+	5935	Sema6c
215	ENSMUSG00000021365	31.48192591	0.967803622	61.9960482	64.05849987	6.001318108	0.00186782	0.126594763	13	41309581	41487362	-	6376	Nedd9
216	ENSMUSG00000049515	25.83168675	0	51.6633735	Inf	Inf	0.00195505	0.131893452	1	91322075	91348306	+	5445	Espnl
217	ENSMUSG00000044716	1120.012403	673.5913209	1566.433485	2.32549535	1.217538055	0.001973186	0.132503563	5	35056766	35087839	+	4275	Dok7
218	ENSMUSG00000005667	3146.667494	4281.563224	2011.771764	0.469868517	-1.089670989	0.002090668	0.139748661	6	83305691	83325908	-	3487	Mthfd2
219	ENSMUSG00000027230	693.9682726	989.0953017	398.8412434	0.403238437	-1.310294931	0.002218812	0.147637113	2	91982328	92024502	-	2603	Creb3l1
220	ENSMUSG00000025403	2601.31104	3542.161257	1660.460824	0.468770534	-1.093046207	0.002315827	0.153391987	10	127517123	127522444	-	3109	Shmt2
221	ENSMUSG00000024843	782.6514567	459.7067205	1105.596193	2.405003329	1.266038891	0.002445103	0.160078654	19	3851773	3894369	+	12024	Chka
222	ENSMUSG00000034761	837.8605004	1179.752615	495.9683856	0.420400327	-1.250164302	0.002454592	0.160078654	12	69803750	69893200	-	8614	Map4k5
223	ENSMUSG00000035946	334.7335447	169.3656339	500.1014555	2.952791804	1.562079638	0.002457203	0.160078654	5	75075601	75077893	+	1665	Gsx2
224	ENSMUSG00000048458	52.43478558	7.742428976	97.12714218	12.54478956	3.649016364	0.002471606	0.160078654	3	105704599	105720842	+	4781	Inka2
225	ENSMUSG00000065954	13337.74478	8819.594408	17855.89515	2.024571009	1.017616244	0.002471706	0.160078654	8	25154552	25256588	-	11920	Tacc1
226	ENSMUSG00000035064	24.79841928	0	49.59683856	Inf	Inf	0.002517363	0.162314204	7	120842831	120907450	+	7408	Eef2k
227	ENSMUSG00000054150	293.4391186	443.2540589	143.6241783	0.324022252	-1.625835203	0.002528805	0.162333655	12	104929933	105009809	-	5548	Syne3
228	ENSMUSG00000022364	2658.949319	3609.90751	1707.991128	0.473139858	-1.079661393	0.002571334	0.164339846	15	57912199	57970067	+	6366	Tbc1d31
229	ENSMUSG00000062373	2459.263301	3342.793711	1575.732892	0.471382032	-1.085031328	0.002597758	0.165303615	15	58782269	58823638	-	6306	Tmem65
230	ENSMUSG00000079173	92.11031035	26.13069779	158.0899229	6.049969433	2.596927853	0.002806593	0.177815957	5	137378637	137477064	-	19813	Zan
231	ENSMUSG00000047171	24.28178555	0	48.56357109	Inf	Inf	0.002857343	0.180247646	8	46292039	46294671	-	2012	Helt
232	ENSMUSG00000040010	11634.85723	15527.44131	7742.273153	0.498618736	-1.003991002	0.002884177	0.18115618	8	121881150	121907694	-	3708	Slc7a5
233	ENSMUSG00000050447	499.9413367	279.6952468	720.1874266	2.574900485	1.364516676	0.003059578	0.191348394	2	50066429	50193569	+	3729	Lypd6
234	ENSMUSG00000032012	935.0088692	568.1007261	1301.917012	2.291701018	1.196418838	0.003090848	0.192477913	9	43743984	43807461	+	5653	Nectin1
235	ENSMUSG00000028601	768.7678097	457.7711132	1079.764506	2.358743212	1.238018366	0.003124708	0.193758476	4	108165437	108179308	+	2287	Echdc2
236	ENSMUSG00000024232	167.1318985	68.71405716	265.5497398	3.864562082	1.950304942	0.003161285	0.195195964	18	3507957	3516404	+	5040	Bambi
237	ENSMUSG00000022012	398.2909949	214.8524041	581.7295856	2.707577735	1.437002758	0.003313968	0.203760065	14	77156763	77721760	+	7962	Enox1
238	ENSMUSG00000026489	637.3234479	372.6043945	902.0425013	2.420912138	1.275550721	0.003378926	0.20688111	1	180165238	180199602	-	5293	Coq8a
239	ENSMUSG00000063177	600.4274833	348.4093039	852.4456628	2.446678815	1.290824725	0.00341791	0.207609217	7	44052290	44056712	+	889	Klk1b27
240	ENSMUSG00000020733	1082.396336	670.6879101	1494.104762	2.227719837	1.155567807	0.003430216	0.207609217	11	115163341	115181181	+	1925	Slc9a3r1
241	ENSMUSG00000025083	124.3185327	204.2065642	44.43050121	0.217576263	-2.200406921	0.003433559	0.207609217	19	56912361	57008228	-	5675	Afap1l2
242	ENSMUSG00000046432	1582.36776	2156.26647	1008.469051	0.467692219	-1.096368667	0.003511473	0.211161097	X	136270253	136271978	+	973	Bex3
243	ENSMUSG00000024587	4926.711354	6581.06463	3272.358078	0.497238405	-1.007990366	0.003521284	0.211161097	18	64499665	64516557	-	2632	Nars
244	ENSMUSG00000032548	97.14572001	30.00191228	164.2895277	5.475968538	2.453114158	0.003609903	0.215588138	9	102988712	103096002	+	13545	Slco2a1
245	ENSMUSG00000029761	1517.718647	966.8358184	2068.601475	2.139558171	1.097312904	0.003632216	0.216035299	6	34598500	34775473	+	12041	Cald1
246	ENSMUSG00000017144	745.8793428	447.1252734	1044.633412	2.336332734	1.224245753	0.0036529	0.21638233	2	51130438	51149111	-	4432	Rnd3
247	ENSMUSG00000026734	23.24851808	0	46.49703615	Inf	Inf	0.003683326	0.216943314	2	19462837	19553914	-	2293	4921504E06Rik
248	ENSMUSG00000032726	29.06684059	57.1004137	1.03326747	0.018095621	-5.788215537	0.003692145	0.216943314	4	123312645	123343252	-	2405	Bmp8a
249	ENSMUSG00000036533	698.879827	416.1555575	981.6040965	2.358743212	1.238018366	0.003714294	0.217368241	17	79333727	79355091	-	2309	Cdc42ep3
250	ENSMUSG00000037820	449.2723092	647.4606231	251.0839952	0.387798093	-1.366622384	0.003896621	0.227126217	2	158116402	158146436	-	4608	Tgm2
251	ENSMUSG00000042388	56.46965969	10.64583984	102.2934795	9.608774981	3.264352514	0.003961716	0.230000511	4	127169204	127237022	+	4521	Dlgap3
252	ENSMUSG00000020680	1181.544019	1619.13546	743.9525784	0.459475193	-1.121941121	0.003998235	0.231199553	11	83473086	83506743	+	2919	Taf15
253	ENSMUSG00000090877	1072.580295	670.6879101	1474.47268	2.198448276	1.13648559	0.004036335	0.23161529	17	34956436	34959238	-	2803	Hspa1b
255	ENSMUSG00000053101	28.58293877	56.13261008	1.03326747	0.018407615	-5.763553482	0.004095581	0.233709391	13	19749682	19824257	-	5974	Gpr141
256	ENSMUSG00000038742	216.6084272	331.9566424	101.2602121	0.305040476	-1.712927409	0.004105792	0.233709391	9	20873808	20879727	-	1582	Angptl6
257	ENSMUSG00000029797	93.82564159	158.719794	28.93148916	0.182280284	-2.45576957	0.004209843	0.238699731	6	48448229	48501250	+	15863	Sspo
258	ENSMUSG00000020598	253.6538973	382.2824307	125.0253639	0.327049725	-1.612418093	0.004238504	0.239393352	12	44328885	44601964	+	13358	Nrcam
259	ENSMUSG00000048537	409.2641539	226.4660476	592.0622603	2.614353307	1.386454122	0.004256029	0.239455033	9	44686304	44735198	-	7179	Phldb1
260	ENSMUSG00000024112	35.03289821	2.903410866	67.16238555	23.13223607	4.531832825	0.00430455	0.241253473	17	25374285	25433783	-	9763	Cacna1h
261	ENSMUSG00000034881	203.4784974	93.87695134	313.0800434	3.335004375	1.737688654	0.004380531	0.243461881	10	81328731	81335172	+	1919	Tbxa2r
263	ENSMUSG00000036390	1107.001909	1516.548276	697.4555423	0.459896697	-1.12061826	0.004394076	0.243461881	6	67035096	67037457	-	1764	Gadd45a
264	ENSMUSG00000040907	985.8601433	1355.892874	615.8274121	0.45418589	-1.138645207	0.004476604	0.247094971	7	24978167	25005958	-	5958	Atp1a3
265	ENSMUSG00000038521	250.7177545	377.4434126	123.9920964	0.328505128	-1.606012205	0.004537313	0.248659534	6	124530345	124542359	-	3129	C1s1
266	ENSMUSG00000031791	823.4442906	506.1612943	1140.727287	2.253683361	1.172284833	0.004539077	0.248659534	8	72572055	72587282	+	2142	Tmem38a
267	ENSMUSG00000042757	64.08823802	14.51705433	113.6594217	7.829372207	2.968896631	0.004577477	0.249823962	9	103482947	103761837	-	9930	Tmem108
269	ENSMUSG00000021067	362.8874322	528.4207776	197.3540868	0.373479044	-1.4209008	0.004667818	0.252860406	12	69965012	69987002	-	5265	Sav1
270	ENSMUSG00000037499	299.0274302	155.8163831	442.2384772	2.838202686	1.504977621	0.004719323	0.25454893	1	191306789	191318194	-	742	Nenf
271	ENSMUSG00000020658	397.5779696	220.6592258	574.4967133	2.603547217	1.380478571	0.004733925	0.25454893	12	3962554	4038915	-	10382	Efr3b
272	ENSMUSG00000005078	750.0309951	1042.324501	457.7374892	0.439150657	-1.187212133	0.004760203	0.255020865	12	72085589	72101461	+	2692	Jkamp
273	ENSMUSG00000022756	612.5931504	859.4096164	365.7766844	0.425613907	-1.232382804	0.00496195	0.264589385	16	17572018	17583214	-	4153	Slc7a4
275	ENSMUSG00000030249	449.4359688	642.621605	256.2503326	0.39875773	-1.326415608	0.005034294	0.266466039	6	142587862	142702315	-	8373	Abcc9
276	ENSMUSG00000038745	56.9535615	11.61364346	102.2934795	8.808043733	3.138821632	0.005046982	0.266466039	7	140920902	140929192	+	5081	Nlrp6
277	ENSMUSG00000028792	1134.875354	722.9493057	1546.801403	2.139571047	1.097321586	0.005084918	0.267499746	4	128991958	129011529	+	2140	Ak2
278	ENSMUSG00000057315	357.0151466	518.7427414	195.2875518	0.376463199	-1.409419254	0.005202916	0.272722625	5	102481391	102897937	+	8792	Arhgap24
279	ENSMUSG00000071723	321.7195055	172.2690447	471.1699663	2.735082017	1.451584096	0.005257093	0.274574764	X	94636069	94643244	+	3781	Gspt2
282	ENSMUSG00000026185	21.69861687	0	43.39723374	Inf	Inf	0.0053984	0.278888062	1	72857932	72874884	-	6006	Igfbp5
283	ENSMUSG00000028776	56.43692776	11.61364346	101.2602121	8.719073594	3.124174856	0.005416231	0.278888062	4	130164454	130175122	-	4358	Tinagl1
285	ENSMUSG00000028789	26.31558856	0.967803622	51.6633735	53.38208323	5.738283702	0.005797299	0.296414887	4	128930233	128962442	-	4024	Azin2
286	ENSMUSG00000066357	1034.70945	660.0420702	1409.376829	2.135283329	1.094427513	0.005843612	0.297738158	9	108572311	108578739	-	4163	Wdr6
287	ENSMUSG00000025314	21.7755815	43.55116299	0	0	-Inf	0.005949553	0.300501037	2	90429754	90580647	-	8352	Ptprj
288	ENSMUSG00000070337	258.4822975	132.5890962	384.3754988	2.898997805	1.535554241	0.005954179	0.300501037	11	97332109	97352077	-	9542	Gpr179
290	ENSMUSG00000047786	217.7398905	329.0532315	106.4265494	0.323432622	-1.628462896	0.00611867	0.307452621	17	17402672	17459387	+	3434	Lix1
291	ENSMUSG00000039166	993.7458791	633.9113724	1353.580386	2.135283329	1.094427513	0.00615865	0.308398101	10	25169090	25307870	-	4375	Akap7
292	ENSMUSG00000039158	258.7547708	384.2180379	133.2915036	0.346916309	-1.527340429	0.006253123	0.311453443	4	63367125	63403354	-	5765	Akna
294	ENSMUSG00000017009	1596.840582	2140.781612	1052.899552	0.491829501	-1.023769821	0.006283785	0.311453443	2	164424247	164443887	-	2547	Sdc4
295	ENSMUSG00000089809	163.3845346	72.58527165	254.1837976	3.50186466	1.808123328	0.006376607	0.314982782	5	99217426	99729065	-	13805	Rasgef1b
297	ENSMUSG00000040102	1078.962137	695.8508042	1462.07347	2.101130675	1.07116589	0.006602579	0.323806412	6	147091379	147112778	+	6449	Klhl42
298	ENSMUSG00000058914	1353.046066	886.5081178	1819.584015	2.052529445	1.037402918	0.006621899	0.323806412	15	10952332	10980150	+	2557	C1qtnf3
299	ENSMUSG00000058013	1024.979225	1390.733805	659.2246459	0.474012096	-1.07700422	0.006755831	0.329250746	5	93093437	93176447	+	9472	Sept11
300	ENSMUSG00000051022	47.20033106	86.13452236	8.26613976	0.09596779	-3.381305918	0.006948103	0.337492536	5	39613935	39755475	-	2230	Hs3st1
301	ENSMUSG00000050052	1139.936419	741.3375745	1538.535263	2.075350442	1.053354969	0.007069864	0.341380551	8	13952008	13975032	-	4695	Tdrp
305	ENSMUSG00000021076	1651.57545	2202.721044	1100.429856	0.499577492	-1.001219615	0.007286322	0.348118953	12	70937857	70964718	+	9726	Actr10
306	ENSMUSG00000016933	1394.251153	1867.860991	920.6413158	0.492885349	-1.020675998	0.007325986	0.348870145	2	160731300	160775760	+	7857	Plcg1
307	ENSMUSG00000036565	1627.901407	1084.90786	2170.894954	2.00099477	1.000717397	0.007393614	0.35072228	5	140620578	140649031	-	5684	Ttyh3
309	ENSMUSG00000002100	148.6640117	64.84284268	232.4851808	3.585363799	1.842119513	0.007446209	0.35072228	2	91118144	91136516	+	4163	Mybpc3
310	ENSMUSG00000085925	132.3882809	210.013386	54.76317591	0.260760407	-1.939203265	0.007461152	0.35072228	12	109589193	109600330	-	6358	Rtl1
311	ENSMUSG00000022040	122.0299514	195.4963317	48.56357109	0.248411674	-2.009195118	0.007502898	0.351550573	14	66084374	66124500	-	2484	Ephx2
313	ENSMUSG00000050645	953.5864525	614.5553	1292.617605	2.103338145	1.072680805	0.007621584	0.352422167	2	152576086	152580312	-	394	Defb19
314	ENSMUSG00000073643	1355.721246	1815.599595	895.8428965	0.493414351	-1.019128417	0.007622474	0.352422167	1	79702262	79776143	-	6488	Wdfy1
315	ENSMUSG00000032278	80.77710011	25.16289417	136.391306	5.420334605	2.438381914	0.007639312	0.352422167	9	61953481	62026856	-	3954	Paqr5
316	ENSMUSG00000027408	1335.127545	881.6690997	1788.585991	2.028636357	1.020510278	0.007642424	0.352422167	2	130390775	130397574	-	2432	Cpxm1
317	ENSMUSG00000034574	531.3418788	741.3375745	321.3461832	0.433468091	-1.206002299	0.007704073	0.354144344	12	71831078	71992333	+	8096	Daam1
318	ENSMUSG00000052131	191.1509457	290.3410866	91.96080483	0.316733694	-1.658657747	0.007743232	0.354739056	6	34412334	34423142	+	1281	Akr1b7
319	ENSMUSG00000050671	57.92136512	13.54925071	102.2934795	7.549751771	2.916429211	0.007765699	0.354739056	12	87278638	87299705	-	2600	Ism2
320	ENSMUSG00000027293	280.5922753	150.977365	410.2071856	2.717011159	1.442020491	0.007833712	0.356727671	2	120089175	120154606	-	4007	Ehd4
321	ENSMUSG00000023013	172.8865275	265.1781924	80.59486266	0.303927189	-1.718202351	0.007984567	0.361941767	15	99579055	99584547	+	1419	Aqp2
323	ENSMUSG00000025213	87.36241097	29.03410866	145.6907133	5.017915823	2.327088269	0.008022728	0.361941767	19	45075241	45079289	+	1681	Kazald1
326	ENSMUSG00000040852	393.699678	228.4016548	558.9977013	2.447432799	1.291269247	0.008258741	0.368431022	17	84511895	84622142	+	6886	Plekhh2
327	ENSMUSG00000049882	231.1980224	343.5702858	118.8257591	0.34585575	-1.531757651	0.008274541	0.368431022	12	69577628	69583028	-	1027	Vcpkmt
329	ENSMUSG00000041936	535.0511995	326.1498206	743.9525784	2.281014832	1.189675828	0.008399557	0.372031448	4	156165290	156197488	-	9285	Agrn
330	ENSMUSG00000040653	113.1870207	44.51896661	181.8550747	4.084889847	2.030297175	0.008760747	0.386853349	10	3366057	3464975	+	2617	Ppp1r14c
331	ENSMUSG00000039395	618.5379769	851.6671874	385.4087663	0.452534478	-1.143900381	0.008826943	0.388598836	1	72159442	72212307	-	2284	Mreg
332	ENSMUSG00000009647	1050.607444	1412.025485	689.1894025	0.488085668	-1.034793704	0.008932562	0.392064151	10	59446984	59616692	-	6936	Mcu
334	ENSMUSG00000052446	1019.465216	667.7844992	1371.145933	2.053276071	1.037927616	0.009021899	0.392466444	8	71951038	71993792	+	4334	Zfp961
335	ENSMUSG00000021068	638.3522962	876.8300816	399.8745109	0.456045612	-1.132749971	0.009022527	0.392466444	12	70011435	70113717	-	17005	Nin
336	ENSMUSG00000042476	47.7169648	86.13452236	9.29940723	0.107963764	-3.211380917	0.009132599	0.396072118	5	8893717	8959231	+	9383	Abcb4
337	ENSMUSG00000043391	89.36348206	30.96971591	147.7572482	4.771023689	2.254298849	0.009243211	0.399679742	16	21649045	21694665	-	6564	2510009E07Rik
338	ENSMUSG00000002324	24.71172429	48.3901811	1.03326747	0.021352833	-5.549428677	0.009390073	0.404828846	14	55618037	55625395	+	2935	Rec8
339	ENSMUSG00000024754	302.2183513	168.3978302	436.0388723	2.58933783	1.372583206	0.009450414	0.406228426	19	21778342	21858327	+	6667	Tmem2
340	ENSMUSG00000021541	824.5545273	1114.909773	534.199282	0.479141268	-1.061477018	0.01000793	0.427858641	13	56773113	56895993	-	3879	Trpc7
341	ENSMUSG00000022514	566.1969633	780.0497194	352.3442073	0.45169455	-1.146580587	0.010046488	0.427858641	16	26581704	26730117	+	11360	Il1rap
342	ENSMUSG00000049097	114.671458	46.45457386	182.8883422	3.936928638	1.977070562	0.010108784	0.427858641	3	96596636	96599775	+	2583	Ankrd34a
343	ENSMUSG00000046794	1033.95839	1384.926983	682.9897977	0.493159427	-1.019873983	0.010127805	0.427858641	8	35375739	35388139	+	6216	Ppp1r3b
345	ENSMUSG00000069833	632.0288408	865.2164381	398.8412434	0.460972799	-1.117246471	0.010141693	0.427858641	19	8989284	9076919	+	18543	Ahnak
346	ENSMUSG00000023959	83.26207301	28.06630504	138.457841	4.933240795	2.302535708	0.010159147	0.427858641	17	44188584	44280172	+	8782	Clic5
348	ENSMUSG00000049804	487.4368542	298.0835156	676.7901929	2.270471722	1.182992068	0.010357401	0.433701306	X	134686519	134696757	+	7996	Armcx4
349	ENSMUSG00000019718	513.2738522	710.3678586	316.1798458	0.445093119	-1.167820897	0.01041338	0.433718987	12	72073428	72085439	-	2679	L3hypdh
350	ENSMUSG00000047030	944.892149	1268.790548	620.9937495	0.489437559	-1.030803277	0.010417351	0.433718987	2	167481133	167492887	-	4510	Spata2
351	ENSMUSG00000022211	225.3920836	118.0720419	332.7121253	2.817873902	1.494607053	0.010462027	0.434338074	14	55490651	55508272	+	6457	Carmil3
352	ENSMUSG00000096054	824.6199911	1112.974165	536.2658169	0.481831325	-1.053399905	0.010575429	0.436308796	10	5020917	5551482	-	40491	Syne1
355	ENSMUSG00000055866	722.1610816	980.3850691	463.937094	0.473219257	-1.079419311	0.010646315	0.437008752	1	91415982	91459324	-	5856	Per2
356	ENSMUSG00000051890	165.0786347	251.6289417	78.52832772	0.312079871	-1.680012787	0.010700724	0.438008292	12	69241176	69284632	+	3137	Klhdc1
358	ENSMUSG00000028793	68.54155009	20.32387606	116.7592241	5.744928957	2.522289052	0.010830545	0.440845554	4	129058271	129085886	+	2872	Rnf19b
359	ENSMUSG00000014303	595.3779196	375.5078053	815.2480338	2.171054828	1.11839616	0.011019937	0.445599938	16	4594713	4624924	+	4373	Glis2
361	ENSMUSG00000037005	208.578488	309.6971591	107.4598169	0.346983541	-1.527060864	0.011066488	0.445599938	X	48108725	48136981	+	4878	Xpnpep2
363	ENSMUSG00000008734	692.2476301	444.2218625	940.2733977	2.116675196	1.081799904	0.011100245	0.445599938	7	118972047	118995211	-	4630	Gprc5b
364	ENSMUSG00000028128	119.7068677	50.32578835	189.087947	3.757277396	1.909687633	0.011212456	0.447524618	3	121723537	121735048	+	2527	F3
369	ENSMUSG00000037406	106.536246	42.58335937	170.4891326	4.003656242	2.001318108	0.011684193	0.461414818	8	25024929	25038962	-	2404	Htra4
373	ENSMUSG00000021390	47.74969672	85.16671874	10.3326747	0.121322916	-3.043076011	0.012491933	0.485757533	13	49608046	49624501	+	2566	Ogn
374	ENSMUSG00000050530	72.57642419	23.22728693	121.9255615	5.249238184	2.392108061	0.012497534	0.485757533	2	3114224	3227806	+	4442	Fam171a1
375	ENSMUSG00000024130	483.7549542	300.0191228	667.4907856	2.224827469	1.153693462	0.012517572	0.485757533	17	24351950	24410201	+	8797	Abca3
377	ENSMUSG00000025533	694.1204314	938.7695134	449.4713495	0.478787757	-1.062541834	0.012577617	0.485947125	5	130011258	130029247	-	4831	Asl
379	ENSMUSG00000045092	376.836543	528.4207776	225.2523085	0.426274511	-1.230145303	0.012843192	0.493802113	3	115710433	115715072	-	3046	S1pr1
381	ENSMUSG00000021066	149.3319214	228.4016548	70.26218796	0.307625564	-1.700752695	0.012991618	0.496886746	12	69892614	69966417	+	9175	Atl1
383	ENSMUSG00000044250	273.2612073	153.8807759	392.6416386	2.551596431	1.351400166	0.013233485	0.503494362	15	97247107	97385680	+	2197	Pced1b
388	ENSMUSG00000032320	194.4666004	100.6515767	288.2816241	2.864154081	1.518109106	0.013624865	0.511704984	9	56041845	56061882	+	4745	Rcn2
390	ENSMUSG00000064280	29.61620624	56.13261008	3.09980241	0.055222845	-4.178590982	0.013926276	0.519743076	5	21292961	21424677	-	4371	Ccdc146
394	ENSMUSG00000037347	74.57749529	25.16289417	123.9920964	4.927576913	2.30087839	0.014549957	0.537798151	X	20059560	20097521	+	2206	Chst7
395	ENSMUSG00000026170	355.6359821	498.4188653	212.8530988	0.427056666	-1.227500582	0.014577976	0.537798151	1	74713574	74737892	+	2173	Cyp27a1
397	ENSMUSG00000022340	700.5066928	459.7067205	941.3066652	2.047624329	1.033951053	0.014878976	0.546137118	15	44671856	44788063	-	7702	Sybu
398	ENSMUSG00000021103	400.2018347	555.519279	244.8843904	0.440820687	-1.181736165	0.014983852	0.54823467	12	73123717	73273988	+	5385	Mnat1
399	ENSMUSG00000034892	713.1306068	957.1577822	469.1034314	0.49010042	-1.028850711	0.015056562	0.54823467	12	69157722	69159186	-	693	Rps29
401	ENSMUSG00000028573	722.6821345	476.159382	969.2048869	2.035463174	1.02535712	0.015086611	0.54823467	4	95557507	95926939	+	5844	Fggy
402	ENSMUSG00000017453	467.4517982	293.2444975	641.6590989	2.188136877	1.129702987	0.015269433	0.553497938	11	77880615	77894096	-	2470	Pipox
403	ENSMUSG00000034171	243.3353767	351.3127148	135.3580386	0.385292171	-1.375975224	0.015324574	0.554118352	4	115967145	116017926	-	7834	Faah
406	ENSMUSG00000026576	736.7550959	487.7730255	985.7371664	2.020893151	1.014993045	0.015726811	0.56446081	1	164437109	164458355	-	3081	Atp1b1
407	ENSMUSG00000046668	54.27219705	14.51705433	94.02733977	6.477026098	2.695331557	0.015783728	0.565111768	18	35829818	35861687	+	2271	Cxxc5
408	ENSMUSG00000009772	21.66588495	0.967803622	42.36396627	43.77330825	5.451979517	0.016064315	0.571865412	1	132316126	132333488	+	3920	Nuak2
409	ENSMUSG00000072812	21.66588495	0.967803622	42.36396627	43.77330825	5.451979517	0.016064315	0.571865412	12	112772194	112802657	-	14163	Ahnak2
410	ENSMUSG00000022018	614.1572057	828.4399005	399.8745109	0.48268379	-1.050849718	0.016090092	0.571865412	14	79288756	79301645	-	918	Rgcc
414	ENSMUSG00000026923	239.8180192	134.5247035	345.111335	2.565412345	1.359190732	0.016990058	0.597047026	2	26457903	26516663	-	14232	Notch1
415	ENSMUSG00000093661	400.2779118	247.7577272	552.7980965	2.23120426	1.157822594	0.017003467	0.597047026	6	99625135	99666771	-	2515	Eif4e3
416	ENSMUSG00000030281	183.2643179	95.81255858	270.7160771	2.82547592	1.498493894	0.017104476	0.599150051	6	113471427	113483140	+	2671	Il17rc
417	ENSMUSG00000034612	30.35046267	3.871214488	56.82971085	14.68007289	3.875787226	0.017185635	0.600549344	10	82985498	83195900	+	5527	Chst11
418	ENSMUSG00000062661	358.8959033	218.7236186	499.068188	2.281729752	1.190127929	0.017387127	0.606076254	2	31245823	31295989	+	4653	Ncs1
421	ENSMUSG00000036743	79.30858726	129.6856854	28.93148916	0.223089303	-2.164306756	0.017650005	0.610916575	18	14706151	14762299	+	1693	Psma8
422	ENSMUSG00000038508	109.4157724	171.3012411	47.53030362	0.277466195	-1.849616081	0.017951205	0.619869579	8	70629393	70632456	-	1852	Gdf15
423	ENSMUSG00000040127	36.00512556	65.8106463	6.19960482	0.094203676	-3.408072828	0.01814292	0.625008599	10	127898518	127911761	+	3038	Sdr9c7
425	ENSMUSG00000042834	27.28339218	2.903410866	51.6633735	17.79402774	4.153321202	0.018473181	0.633391032	18	33437019	33464029	-	2513	Nrep
426	ENSMUSG00000020875	519.7025805	703.5932332	335.8119278	0.477281349	-1.067088133	0.018623942	0.637061218	11	96271457	96276595	+	2574	Hoxb9
427	ENSMUSG00000025666	174.6655522	258.4035671	90.92753736	0.351881897	-1.5068368	0.018682595	0.637570909	X	81070698	81097872	+	4025	Tmem47
428	ENSMUSG00000040296	201.4048854	109.3618093	293.4479615	2.683276396	1.42399567	0.018781854	0.63849868	4	40203773	40239828	-	7050	Ddx58
429	ENSMUSG00000073375	29.83382893	3.871214488	55.79644338	14.41316247	3.849315015	0.018816901	0.63849868	17	67630964	67632723	-	1760	Lrrc30
432	ENSMUSG00000057777	16.93656339	33.87312677	0	0	-Inf	0.019336233	0.652239796	3	86545581	86548629	-	3049	Mab21l2
436	ENSMUSG00000010830	190.0265595	277.7596395	102.2934795	0.368280574	-1.441122794	0.020077434	0.66746084	15	79516411	79527739	+	1411	Kdelr3
437	ENSMUSG00000072966	58.14075822	98.71596945	17.56554699	0.177940277	-2.490534988	0.020121498	0.66746084	X	135839034	135844730	+	4540	Gprasp2
438	ENSMUSG00000041372	20.63261748	0.967803622	40.29743133	41.63802492	5.379829732	0.020137578	0.66746084	6	120203073	120294559	-	3779	B4galnt3
439	ENSMUSG00000032220	289.688214	172.2690447	407.1073832	2.363206831	1.240745901	0.020157792	0.66746084	9	70207350	70399766	+	5704	Myo1e
440	ENSMUSG00000109946	468.2639067	635.8469797	300.6808338	0.472882381	-1.080446705	0.020221459	0.66746084	2	27442324	27444221	+	1898	Brd3os
442	ENSMUSG00000057948	62.858579	20.32387606	105.3932819	5.185688085	2.374535432	0.020335045	0.66746084	11	116062095	116077961	-	4679	Unc13d
444	ENSMUSG00000037583	396.11211	248.7255309	543.4986892	2.185134302	1.127721953	0.020364998	0.66746084	4	133553376	133556536	+	1132	Nr0b2
446	ENSMUSG00000002058	623.5167655	414.2199502	832.8135808	2.010558836	1.007596555	0.020428736	0.66746084	11	78343482	78349164	+	2448	Unc119
447	ENSMUSG00000048337	38.48567473	7.742428976	69.22892049	8.941498941	3.160516703	0.020506975	0.668451252	14	34143992	34152489	-	3627	Npy4r
450	ENSMUSG00000000142	76.02920072	28.06630504	123.9920964	4.417827578	2.143337113	0.020739942	0.670972933	11	108920349	108950783	+	5506	Axin2
451	ENSMUSG00000001555	459.6368283	295.1801047	624.0935519	2.114280542	1.08016682	0.020766456	0.670972933	11	100415697	100424824	+	2935	Fkbp10
452	ENSMUSG00000035578	368.74114	508.0969016	229.3853783	0.451459904	-1.147330234	0.02082914	0.671509354	16	33012683	33056218	-	6164	Iqcg
454	ENSMUSG00000061540	35.03732194	63.87503905	6.19960482	0.097058333	-3.365004106	0.021090358	0.676935469	4	63362449	63365878	+	775	Orm2
456	ENSMUSG00000019831	160.9579485	83.23111149	238.6847856	2.867735169	1.519911799	0.02133175	0.680178193	10	40883475	40938570	+	2854	Wasf1
457	ENSMUSG00000006611	135.651743	205.1743679	66.12911808	0.322306918	-1.633492942	0.021341887	0.680178193	13	23702034	23710854	-	3572	Hfe
458	ENSMUSG00000048794	102.3377122	44.51896661	160.1564579	3.597488218	1.846989962	0.021378096	0.680178193	6	90403479	90428797	-	4122	Cfap100
459	ENSMUSG00000078512	67.41008684	23.22728693	111.5928868	4.804387491	2.264352514	0.021536437	0.683723209	4	143894237	143900380	-	2087	Pramef6
460	ENSMUSG00000042766	181.1526673	265.1781924	97.12714218	0.366271228	-1.449015719	0.021651372	0.685877801	3	89234177	89246309	-	3792	Trim46
463	ENSMUSG00000029269	26.25012471	2.903410866	49.59683856	17.08226663	4.094427513	0.022377913	0.702948532	5	87513339	87538195	-	2780	Sult1b1
466	ENSMUSG00000022747	519.0612086	340.666875	697.4555423	2.047324215	1.033739586	0.022515299	0.703445618	16	58468125	58524243	-	6172	St3gal6
467	ENSMUSG00000030772	20.11598374	0.967803622	39.26416386	40.57038325	5.342355026	0.022543858	0.703445618	7	112116017	112159057	-	3359	Dkk3
471	ENSMUSG00000036526	123.5453502	59.03602094	188.0546795	3.185422671	1.671484815	0.023314848	0.720361024	5	140872990	141000582	-	4866	Card11
472	ENSMUSG00000041476	186.1677287	101.6193803	270.7160771	2.664020153	1.413604997	0.023333132	0.720361024	X	157698910	157752591	+	2275	Smpx
473	ENSMUSG00000018821	304.9430655	423.8979865	185.9881446	0.438756848	-1.188506451	0.023693965	0.729954452	19	42123273	42129059	-	1236	Avpi1
474	ENSMUSG00000025355	86.27960415	137.4281143	35.13109398	0.255632511	-1.967856766	0.023825408	0.732455366	10	128790910	128800824	+	3533	Mmp19
475	ENSMUSG00000034898	62.11016848	103.5549876	20.6653494	0.19955919	-2.325111379	0.023940428	0.734441943	9	79815051	80012851	-	5097	Filip1
477	ENSMUSG00000049152	50.78403528	87.10232598	14.46574458	0.166077592	-2.590070662	0.024405992	0.745585133	15	9335550	9370955	+	3102	Ugt3a2
478	ENSMUSG00000115388	136.6850104	205.1743679	68.19565302	0.332379009	-1.589098823	0.024484139	0.74594036	15	76101481	76120195	-	12332	Eppk1
479	ENSMUSG00000040536	15.96875976	31.93751953	0	0	-Inf	0.024519999	0.74594036	4	14952245	15149794	-	5237	Necab1
481	ENSMUSG00000015354	234.586218	136.4603107	332.7121253	2.438160397	1.285793038	0.024732023	0.749262021	9	95637601	95698096	+	4625	Pcolce2
483	ENSMUSG00000036918	135.6499726	67.74625354	203.5536916	3.004648685	1.587196315	0.024874614	0.750461449	17	87282886	87381769	+	6315	Ttc7
485	ENSMUSG00000052516	19.59935001	0.967803622	38.23089639	39.50274159	5.303880878	0.02523534	0.758204909	16	73891839	74411825	-	16983	Robo2
486	ENSMUSG00000040289	15.49901205	0	30.9980241	Inf	Inf	0.025317859	0.759119005	3	8663359	8667256	-	3265	Hey1
488	ENSMUSG00000059493	75.47983506	29.03410866	121.9255615	4.199390547	2.070179966	0.025528361	0.762293596	X	161833296	162159730	-	8805	Nhs
491	ENSMUSG00000015966	201.5163523	289.373283	113.6594217	0.39277787	-1.348214448	0.025921391	0.76732924	14	29996135	30008896	-	3707	Il17rb
493	ENSMUSG00000035164	304.0079938	420.9945756	187.0214121	0.444237106	-1.170598191	0.025960288	0.76732924	9	52111344	52168572	-	6845	Zc3h12c
497	ENSMUSG00000043895	230.518612	134.5247035	326.5125205	2.42715659	1.279267188	0.02633105	0.772024254	9	20962361	20976781	-	7971	S1pr2
498	ENSMUSG00000034435	19.87270618	38.71214488	1.03326747	0.026691042	-5.227500582	0.026427391	0.773293047	12	73543402	73546392	-	2991	Tmem30b
500	ENSMUSG00000033965	451.1636837	606.812871	295.5144964	0.486994443	-1.038022783	0.026957419	0.785647032	X	103697414	103821983	-	4263	Slc16a2
501	ENSMUSG00000027864	25.21685724	2.903410866	47.53030362	16.37050552	4.033026968	0.027086958	0.787846596	3	101040232	101110278	-	10464	Ptgfrn
502	ENSMUSG00000023443	102.2722484	46.45457386	158.0899229	3.403107806	1.766852855	0.027299625	0.792450463	X	137115397	137122083	-	1985	Esx1
503	ENSMUSG00000041762	263.2815067	158.719794	367.8432193	2.317563613	1.212608939	0.027511347	0.796179336	2	73341506	73386572	-	6679	Gpr155
505	ENSMUSG00000061013	141.169284	72.58527165	209.7532964	2.889750105	1.530944739	0.027637521	0.797492987	18	6910459	7004780	-	3925	Mkx
507	ENSMUSG00000020154	107.8242918	50.32578835	165.3227952	3.285051276	1.715915889	0.028059624	0.806478963	10	116275523	116389535	+	13333	Ptprb
509	ENSMUSG00000034501	492.8261255	658.106463	327.545788	0.497709423	-1.006624393	0.028216946	0.806740954	12	72536383	72580119	+	4300	Pcnx4
510	ENSMUSG00000028373	183.735836	265.1781924	102.2934795	0.38575374	-1.37424795	0.028234826	0.806740954	4	65380803	66404611	-	4959	Astn2
511	ENSMUSG00000067724	22.80884897	43.55116299	2.06653494	0.047450741	-4.397425584	0.028422173	0.810504699	5	24502757	24527202	-	3475	Gbx1
513	ENSMUSG00000085795	311.667264	194.528528	428.8060001	2.20433478	1.140343348	0.028601037	0.812425571	8	26977325	26981461	+	3392	Zfp703
514	ENSMUSG00000066688	51.13966272	15.48485795	86.79446748	5.605118739	2.486744935	0.028743819	0.814892849	4	143615003	143618595	+	2464	Gm13083
515	ENSMUSG00000032352	136.1011425	69.68186079	202.5204241	2.906357865	1.539212355	0.029134455	0.824363649	9	77430823	77544870	-	8195	Lrrc1
516	ENSMUSG00000048612	456.6829952	611.6518891	301.7141012	0.493277478	-1.019528677	0.029239857	0.825742641	19	37899036	38043577	-	12603	Myof
517	ENSMUSG00000035041	60.17456123	99.68377307	20.6653494	0.207309061	-2.27014492	0.029456988	0.830080037	10	81084324	81098874	-	3016	Creb3l3
520	ENSMUSG00000044456	121.4460834	60.00382457	182.8883422	3.047944752	1.607836752	0.029929728	0.838723068	12	102283048	102390855	+	6835	Rin3
521	ENSMUSG00000040891	92.13596523	40.64775213	143.6241783	3.533385509	1.821051163	0.030029064	0.839242295	7	19013284	19023538	-	2037	Foxa3
528	ENSMUSG00000071637	258.0558996	359.0551438	157.0566554	0.437416531	-1.192920351	0.031289083	0.863531291	16	15887286	15891031	+	3746	Cebpd
532	ENSMUSG00000037440	31.31826629	5.806821732	56.82971085	9.786715259	3.290824725	0.031916457	0.874222946	10	23894688	23905343	+	2416	Vnn1
535	ENSMUSG00000044707	125.9648593	63.87503905	188.0546795	2.944102772	1.557828034	0.03246293	0.882518168	11	43528784	43586997	+	2781	Ccnjl
536	ENSMUSG00000031616	18.90490255	36.77653764	1.03326747	0.028095833	-5.153500001	0.032476634	0.882518168	8	77663031	77724464	-	5476	Ednra
537	ENSMUSG00000022895	281.8405122	175.1724556	388.5085687	2.217863347	1.149170477	0.032522115	0.882518168	16	95702075	95721051	+	5780	Ets2
540	ENSMUSG00000060591	317.1211117	201.3031534	432.9390699	2.150682007	1.104794228	0.032889194	0.887520983	7	140954837	140955987	-	655	Ifitm2
544	ENSMUSG00000039987	98.17191043	45.48677024	150.8570506	3.316503894	1.72966322	0.033532821	0.89823578	5	20758663	20882124	-	6929	Phtf2
546	ENSMUSG00000053852	69.34569409	27.09850142	111.5928868	4.11804642	2.041960093	0.033942893	0.905889809	X	56870163	57001558	+	9817	Adgrg4
549	ENSMUSG00000017057	75.41437121	30.96971591	119.8590265	3.870201034	1.952408508	0.034386871	0.912724024	X	36112110	36171259	+	3712	Il13ra1
550	ENSMUSG00000079598	36.9030416	8.710232598	65.09585061	7.473491652	2.901782435	0.034472394	0.91331237	6	38663069	38680864	+	1428	Clec2l
552	ENSMUSG00000038296	30.80163256	5.806821732	55.79644338	9.608774981	3.264352514	0.034609697	0.913548557	7	111471661	111779977	-	2575	Galnt18
554	ENSMUSG00000042759	210.0700024	296.1479083	123.9920964	0.418683006	-1.256069734	0.034770791	0.913548557	7	126584942	126589112	+	3779	Apobr
556	ENSMUSG00000020151	32.83543557	6.774625354	58.89624579	8.693653554	3.119962605	0.034905521	0.914307431	10	116018213	116274932	+	5929	Ptprr
558	ENSMUSG00000043953	315.5959824	429.7048082	201.4871567	0.468896677	-1.09265804	0.035212209	0.918796939	9	111054486	111057519	-	2598	Ccrl2
559	ENSMUSG00000024371	116.0338151	174.204652	57.86297832	0.332155185	-1.590070662	0.035321191	0.918796939	17	34862604	34898265	-	3872	C2
561	ENSMUSG00000015134	18.0494488	0.967803622	35.13109398	36.2998166	5.181890354	0.035372295	0.918796939	7	66390890	66427517	-	4617	Aldh1a3
564	ENSMUSG00000040118	18.42100074	35.80873402	1.03326747	0.02885518	-5.115025853	0.035996562	0.927190906	5	15934691	16374511	+	12416	Cacna2d1
565	ENSMUSG00000033287	23.66695604	2.903410866	44.43050121	15.30286386	3.935729767	0.036013591	0.927190906	15	78428564	78439303	+	2541	Kctd17
566	ENSMUSG00000074240	23.66695604	2.903410866	44.43050121	15.30286386	3.935729767	0.036013591	0.927190906	8	72204335	72212837	-	2014	Cib3
568	ENSMUSG00000018427	212.0710735	298.0835156	126.0586313	0.422897023	-1.24162169	0.036219935	0.929219871	11	86936425	86993707	-	4847	Ypel2
571	ENSMUSG00000059456	307.4687303	196.4641353	418.4733254	2.130024011	1.090869693	0.036839749	0.939363296	14	66153257	66281052	-	7398	Ptk2b
574	ENSMUSG00000028392	43.46004427	74.5208789	12.39920964	0.166385714	-2.587396527	0.037535011	0.952892291	4	62480053	62497298	+	2352	Bspry
577	ENSMUSG00000026437	57.75505218	94.84475496	20.6653494	0.217886054	-2.198354237	0.038066576	0.961362479	1	132112237	132139684	-	4764	Cdk18
580	ENSMUSG00000021822	360.2600308	483.901811	236.6182506	0.488979882	-1.032152984	0.038408403	0.964978009	14	20836660	20843385	+	2367	Plau
581	ENSMUSG00000023009	278.7079778	176.1402592	381.2756964	2.164614144	1.114109879	0.038741185	0.9716636	15	99422035	99457748	-	5002	Nckap5l
583	ENSMUSG00000061232	206.166056	289.373283	122.9588289	0.424914241	-1.234756398	0.039156123	0.978701581	17	33996017	34000333	-	2608	H2-K1
584	ENSMUSG00000023484	82.96748569	36.77653764	129.1584338	3.51197916	1.812284284	0.039253384	0.979338582	15	99055174	99058978	+	1999	Prph
586	ENSMUSG00000024659	14.03315252	28.06630504	0	0	-Inf	0.039493011	0.979338582	19	20373428	20390944	-	2608	Anxa1
588	ENSMUSG00000025407	377.9644655	250.6611381	505.2677928	2.01574044	1.01130988	0.039558649	0.979338582	10	127329882	127341974	-	4995	Gli1
589	ENSMUSG00000030621	265.0861862	166.462223	363.7101494	2.184941081	1.127594377	0.039584849	0.979338582	7	89632392	89854359	+	14624	Me3
593	ENSMUSG00000063903	27.73456207	4.83901811	50.63010603	10.46288831	3.387209262	0.040019683	0.982810925	7	44225360	44229618	+	1077	Klk1
594	ENSMUSG00000044345	168.5384883	240.9831019	96.09387471	0.39875773	-1.326415608	0.040062427	0.982810925	19	42147400	42151703	+	4304	Marveld1
598	ENSMUSG00000034947	137.8492056	201.3031534	74.39525784	0.369568269	-1.436087204	0.040431286	0.985225262	11	101582242	101591788	+	3138	Tmem106a
603	ENSMUSG00000027562	373.8968594	248.7255309	499.068188	2.00650165	1.004682342	0.041456232	1	3	14886273	14900770	+	2422	Car2
605	ENSMUSG00000053080	56.14234045	20.32387606	91.96080483	4.524767055	2.177843521	0.041942969	1	19	7417625	7425904	+	7032	2700081O15Rik
606	ENSMUSG00000028076	93.83271864	143.2349361	44.43050121	0.310193186	-1.688761098	0.041946242	1	3	86995834	86999441	-	2570	Cd1d1
607	ENSMUSG00000028145	281.5193871	383.2502343	179.7885398	0.469115277	-1.091985612	0.042188402	1	3	94310089	94332540	+	4025	Them4
610	ENSMUSG00000034883	99.77046806	150.977365	48.56357109	0.321661271	-1.636385855	0.042560034	1	12	69168814	69179009	+	1500	Lrr1
613	ENSMUSG00000047497	51.07419887	17.4204652	84.72793254	4.863700916	2.282054516	0.042803906	1	15	11064790	11349231	+	10921	Adamts12
614	ENSMUSG00000040722	60.69384829	23.22728693	98.16040965	4.226081589	2.07932062	0.042887211	1	9	57441327	57468060	-	3707	Scamp5
615	ENSMUSG00000021719	154.627416	87.10232598	222.1525061	2.55047731	1.350767266	0.042963864	1	13	104945904	105054930	-	7077	Rgs7bp
616	ENSMUSG00000047822	105.7082175	158.719794	52.69664097	0.332010518	-1.59069915	0.042964038	1	9	21835510	21837347	+	865	Angptl8
618	ENSMUSG00000038555	92.03776946	43.55116299	140.5243759	3.226650364	1.690037258	0.043188644	1	18	34840589	34847463	+	1926	Reep2
619	ENSMUSG00000035273	20.08325182	1.935607244	38.23089639	19.75137079	4.303880878	0.043192129	1	5	100679484	100719716	-	3516	Hpse
620	ENSMUSG00000032473	23.3254827	43.55116299	3.09980241	0.071176111	-3.812463083	0.043301953	1	9	99689461	99717267	-	4456	Cldn18
622	ENSMUSG00000049001	22.63368857	2.903410866	42.36396627	14.59110275	3.867017017	0.043492508	1	6	65671590	65712326	+	10114	Ndnf
628	ENSMUSG00000010476	17.45319712	33.87312677	1.03326747	0.030504048	-5.034855504	0.044206109	1	7	137193673	137314445	-	9227	Ebf3
629	ENSMUSG00000089917	328.1517746	440.350648	215.9529012	0.490411226	-1.02793609	0.044746882	1	2	181569149	181584892	-	4629	Uckl1
630	ENSMUSG00000031387	339.0594699	453.8998987	224.219041	0.493983457	-1.017465367	0.04483487	1	X	73922121	73930850	-	2494	Renbp
633	ENSMUSG00000034765	73.83173808	31.93751953	115.7259566	3.623511104	1.857388315	0.045473863	1	19	53529109	53542431	+	2473	Dusp5
644	ENSMUSG00000044863	105.1429273	53.22919921	157.0566554	2.950573328	1.560995313	0.046953211	1	2	152604327	152612729	+	468	Defb36
645	ENSMUSG00000078486	26.7012946	4.83901811	48.56357109	10.03583165	3.327088269	0.047334084	1	4	156215868	156221307	+	3901	Perm1
652	ENSMUSG00000041607	46.94555272	78.39209338	15.49901205	0.197711419	-2.338531895	0.047763626	1	18	82475146	82585637	+	8403	Mbp
653	ENSMUSG00000020974	269.709352	365.8297691	173.588935	0.474507406	-1.075497489	0.048328065	1	12	69201773	69228195	-	2881	Pole2
655	ENSMUSG00000053580	58.78831965	94.84475496	22.73188434	0.239674659	-2.060850713	0.048498141	1	11	105589986	105929304	+	16605	Tanc2
656	ENSMUSG00000041301	12.91584338	0	25.83168675	Inf	Inf	0.048542544	1	6	18170687	18322768	+	7765	Cftr
659	ENSMUSG00000045404	33.65108035	59.03602094	8.26613976	0.140018579	-2.836309825	0.049029751	1	12	99964499	100062682	+	3112	Kcnk13
