# Supplementary material for: Deletion of Meg8-DMR Enhances Migration and Invasion of MLTC-1 Depending on the CTCF Binding Sites
Source: Int J Mol Sci. 2022 Aug 8;23(15):8828. doi: 10.3390/ijms23158828 (PMC9369160; doi:10.3390/ijms23158828)
Supplement: Supplementary file 1 [file ijms-23-08828-s001.zip › Table S4_MLTC-1_vs_(GGCG)n-KO.txt.csv]

	id	baseMean	baseMeanA	baseMeanB	foldChange	log2FoldChange	pval	padj	Chromosome	Start.Site	End.Site	Direction	Length	Name
1	ENSMUSG00000039196	524.2676138	1028.792669	19.74255904	0.019190027	-5.703499452	1.46654e-24	2.1193e-20	4	63344560	63348163	+	775	Orm1
2	ENSMUSG00000024143	601.233906	1144.279217	58.18859507	0.050851745	-4.297558905	1.19871e-18	8.66131e-15	17	86963082	87000069	+	4151	Rhoq
3	ENSMUSG00000038156	1063.953226	1957.496995	170.409457	0.087054773	-3.521932787	4.09296e-17	1.97158e-13	7	113765998	114043370	+	10382	Spon1
4	ENSMUSG00000022425	1954.367379	460.0214177	3448.71334	7.496853858	2.906285279	1.33714e-14	4.83076e-11	15	54838901	54952892	-	5779	Enpp2
5	ENSMUSG00000014444	242.5390696	471.5700726	13.50806671	0.028644877	-5.125579048	2.06602e-14	5.9712e-11	8	122481698	122551329	-	9935	Piezo1
6	ENSMUSG00000028883	122.7044577	245.4089153	0	0	-Inf	2.83696e-13	6.83282e-10	5	13125414	13602565	+	13868	Sema3a
7	ENSMUSG00000052056	113.0805786	226.1611572	0	0	-Inf	1.96343e-12	3.90594e-09	2	170108643	170148103	-	6139	Zfp217
8	ENSMUSG00000038119	509.6635629	91.4268508	927.900275	10.14910026	3.343279929	2.16231e-12	3.90594e-09	9	35421128	35507652	+	7715	Cdon
9	ENSMUSG00000019828	107.3062512	214.6125024	0	0	-Inf	6.42198e-12	1.03116e-08	10	10686059	11082356	-	7648	Grm1
10	ENSMUSG00000001555	149.3618604	293.5283105	5.195410274	0.017699861	-5.820118165	9.12992e-12	1.31937e-08	11	100415697	100424824	+	2935	Fkbp10
11	ENSMUSG00000001131	103.4566996	206.9133992	0	0	-Inf	1.4299e-11	1.87849e-08	X	20870166	20874735	+	888	Timp1
12	ENSMUSG00000023031	252.6998077	477.3444	28.05521548	0.05877353	-4.088689636	2.15438e-11	2.59441e-08	15	100674421	100687921	-	2306	Cela1
13	ENSMUSG00000037936	524.0016582	109.712221	938.2910955	8.55229333	3.096311336	3.2008e-11	3.55806e-08	5	125277087	125341094	-	8500	Scarb1
14	ENSMUSG00000012819	168.91021	11.54865484	326.2717652	28.25192802	4.820277421	7.79241e-11	8.04343e-08	10	60302748	60696490	-	16939	Cdh23
15	ENSMUSG00000032473	281.9437826	43.30745564	520.5801095	12.02056555	3.58743287	2.64972e-10	2.55274e-07	9	99689461	99717267	-	4456	Cldn18
16	ENSMUSG00000032549	98.68310715	196.3271322	1.039082055	0.005292605	-7.561806169	3.71088e-10	3.35162e-07	9	103111787	103185276	+	5031	Rab6b
17	ENSMUSG00000073077	84.69013548	169.380271	0	0	-Inf	8.0241e-10	6.82096e-07	X	79266559	79517285	-	9839	Gm7173
18	ENSMUSG00000033177	445.6276573	107.7874452	783.4678694	7.268637532	2.861684964	2.30036e-09	1.84681e-06	16	45656315	45693658	-	2837	Tmprss7
19	ENSMUSG00000002985	5843.386792	9385.206832	2301.566751	0.245233461	-2.027772254	2.95964e-09	2.25104e-06	7	19696109	19699188	-	2138	Apoe
20	ENSMUSG00000057315	284.9360915	515.8399161	54.03226685	0.104746192	-3.2550303	4.87005e-09	3.37696e-06	5	102481391	102897937	+	8792	Arhgap24
21	ENSMUSG00000026956	781.289508	1319.433815	243.1452008	0.184279953	-2.440028964	4.90736e-09	3.37696e-06	2	25359889	25365682	-	4071	Uap1l1
22	ENSMUSG00000057880	309.0019741	68.32954113	549.674407	8.044462146	3.007995965	1.71349e-08	1.12553e-05	16	8513429	8621568	+	7748	Abat
23	ENSMUSG00000076441	2969.950098	4739.760423	1200.139773	0.253206843	-1.9816117	1.82858e-08	1.1489e-05	2	31470207	31520672	+	2414	Ass1
24	ENSMUSG00000062184	367.7138212	94.31401451	641.1136278	6.797649651	2.765036008	3.42205e-08	2.0605e-05	X	51387212	51681856	-	7807	Hs6st2
25	ENSMUSG00000037709	924.1373135	329.1366629	1519.137964	4.615523384	2.206494254	3.745e-08	2.16476e-05	6	58932090	59024549	-	10505	Fam13a
26	ENSMUSG00000069833	507.0794648	860.3747854	153.7841441	0.178740877	-2.484058483	5.29905e-08	2.94525e-05	19	8989284	9076919	+	18543	Ahnak
27	ENSMUSG00000031530	136.0640841	14.43581855	257.6923496	17.85089974	4.157924887	5.70531e-08	3.05361e-05	8	34807297	34819894	+	2740	Dusp4
28	ENSMUSG00000041324	2586.256679	1082.686391	4089.826968	3.77748072	1.917424392	6.30962e-08	3.25644e-05	13	16011851	16031621	+	6390	Inhba
29	ENSMUSG00000037820	373.3533153	643.8375072	102.8691234	0.159774978	-2.645886608	1.01926e-07	5.07909e-05	2	158116402	158146436	-	4608	Tgm2
30	ENSMUSG00000036437	191.9271145	33.68357661	350.1706525	10.39588689	3.377940937	1.15794e-07	5.57782e-05	8	66697192	66706792	+	3454	Npy1r
31	ENSMUSG00000029761	578.9060118	961.4255153	196.3865084	0.204265963	-2.291479271	1.83699e-07	8.56335e-05	6	34598500	34775473	+	12041	Cald1
32	ENSMUSG00000034981	860.8671124	1395.46246	326.2717652	0.233809059	-2.096597263	2.144e-07	9.68218e-05	5	91517615	91626894	+	5068	Parm1
33	ENSMUSG00000042115	209.1696916	44.26984355	374.0695397	8.449759696	3.078910313	3.96844e-07	0.000173781	1	132298626	132307357	+	4269	Klhdc8a
34	ENSMUSG00000027339	686.5116176	1116.369968	256.6532675	0.229899832	-2.120922686	4.82018e-07	0.000201151	2	131989415	132030258	-	11993	Rassf2
35	ENSMUSG00000014773	357.3440297	106.8250573	607.8630021	5.690266102	2.508496121	4.87183e-07	0.000201151	17	15367354	15376872	-	4219	Dll1
36	ENSMUSG00000021831	13896.42239	21077.25747	6715.58732	0.318617701	-1.650101675	6.16224e-07	0.000247363	14	45283087	45318771	-	5285	Ero1l
37	ENSMUSG00000032839	155.9031293	285.8292072	25.97705137	0.090883124	-3.459843758	6.34954e-07	0.000247992	9	95705082	95750375	-	8030	Trpc1
38	ENSMUSG00000030621	480.2142457	165.5307193	794.897772	4.802116339	2.263670356	7.31423e-07	0.000278153	7	89632392	89854359	+	14624	Me3
39	ENSMUSG00000027605	1287.171554	2014.277881	560.0652276	0.278047648	-1.846595961	1.02849e-06	0.000381096	2	155517948	155585724	+	10163	Acss2
40	ENSMUSG00000090877	1493.602523	666.9348169	2320.270228	3.479005998	1.798675166	1.21321e-06	0.000438301	17	34956436	34959238	-	2803	Hspa1b
41	ENSMUSG00000061462	339.7179818	105.8626693	573.5732943	5.418088338	2.437783916	1.31648e-06	0.000464012	11	58994256	59136402	-	28898	Obscn
42	ENSMUSG00000057914	266.6123742	76.02864435	457.1961041	6.013471739	2.588198138	2.10761e-06	0.000725167	2	14603088	14987908	+	13228	Cacnb2
43	ENSMUSG00000035458	348.2434027	113.5617726	582.9250328	5.133109668	2.359833084	2.21836e-06	0.000745524	7	4518305	4524229	-	2063	Tnni3
44	ENSMUSG00000026576	1095.088578	485.0435032	1705.133652	3.515424165	1.813698773	2.51378e-06	0.000825605	1	164437109	164458355	-	3081	Atp1b1
45	ENSMUSG00000028804	132.1205203	22.13492177	242.1061188	10.9377445	3.451243361	2.87896e-06	0.000924531	4	127987857	128567656	+	17077	Csmd2
46	ENSMUSG00000026627	1168.696408	528.3509588	1809.041857	3.423939764	1.775657321	3.2379e-06	0.001017193	1	191325912	191350914	+	2246	Tmem206
47	ENSMUSG00000025355	70.40770524	136.6590823	4.156328219	0.030413846	-5.039127947	5.06445e-06	0.001557156	10	128790910	128800824	+	3533	Mmp19
48	ENSMUSG00000036412	46.6758133	93.35162661	0	0	-Inf	5.66791e-06	0.001706394	18	60911780	60918561	+	2975	Arsi
49	ENSMUSG00000053141	204.5767016	355.1211363	54.03226685	0.15215165	-2.716418115	6.25733e-06	0.001845402	2	161521990	162661147	-	12611	Ptprt
50	ENSMUSG00000030772	51.91575567	0.962387903	102.8691234	106.8894602	6.739975793	6.62423e-06	0.001914536	7	112116017	112159057	-	3359	Dkk3
51	ENSMUSG00000002602	1026.703371	1575.428998	477.9777452	0.303395295	-1.720729383	9.17647e-06	0.00260018	7	25757273	25788705	-	5033	Axl
52	ENSMUSG00000050335	916.4790314	1407.973502	424.9845604	0.301841306	-1.728137849	1.20019e-05	0.003335373	14	47367751	47386160	+	1858	Lgals3
53	ENSMUSG00000030551	1518.425451	2286.633658	750.2172436	0.328088079	-1.607844921	1.23753e-05	0.003374247	7	70351944	70366735	-	8625	Nr2f2
54	ENSMUSG00000030022	54.47511373	1.924775806	107.0254516	55.60411311	5.7971197	1.30344e-05	0.003424721	6	92772699	92943492	-	15048	Adamts9
55	ENSMUSG00000075217	54.47511373	1.924775806	107.0254516	55.60411311	5.7971197	1.30344e-05	0.003424721	2	85483594	85519024	-	2272	4833423E24Rik
56	ENSMUSG00000040584	222.8410427	379.1808339	66.50125151	0.175381363	-2.511432647	1.37675e-05	0.003552747	5	8660077	8748575	+	5480	Abcb1a
57	ENSMUSG00000005237	260.0327582	84.69013548	435.375381	5.140803926	2.361993988	1.41152e-05	0.003578562	11	69420809	69549110	-	14968	Dnah2
58	ENSMUSG00000023805	167.0646024	292.5659226	41.56328219	0.142064673	-2.815380246	1.49855e-05	0.003733714	17	5941280	6044290	+	8342	Synj2
59	ENSMUSG00000018411	504.4149615	796.8571838	211.9727392	0.266010953	-1.910442443	1.83653e-05	0.00447864	11	104231390	104332090	+	7531	Mapt
60	ENSMUSG00000028943	1696.751723	862.2995613	2531.203886	2.935411311	1.553562669	1.85951e-05	0.00447864	4	152120331	152152371	-	8272	Espn
61	ENSMUSG00000058740	684.8763004	309.8889048	1059.863696	3.420140829	1.774055731	1.96839e-05	0.00466315	2	25863734	25918273	+	9499	Kcnt1
62	ENSMUSG00000020123	165.6593676	288.716371	42.60236425	0.147557841	-2.760647513	2.19036e-05	0.005105316	10	122448499	122453452	+	2670	Avpr1a
63	ENSMUSG00000039354	1214.869998	608.2291548	1821.510842	2.994777261	1.582448705	2.72261e-05	0.006245148	1	72583251	72633134	+	5728	Smarcal1
64	ENSMUSG00000026170	303.925316	495.6297701	112.2208619	0.226420745	-2.142921947	3.11241e-05	0.007027724	1	74713574	74737892	+	2173	Cyp27a1
65	ENSMUSG00000028108	2370.507372	3472.295555	1268.719189	0.36538341	-1.452516966	3.62039e-05	0.008048967	3	95734147	95739569	-	2521	Ecm1
66	ENSMUSG00000027603	141.7740874	249.2584669	34.28970781	0.137566873	-2.861794996	3.74845e-05	0.008207393	2	155490379	155518237	-	3264	Ggt7
67	ENSMUSG00000024107	3799.798137	2089.344138	5510.252137	2.63731189	1.399068195	4.09236e-05	0.008719161	17	88741549	88791976	-	2553	Lhcgr
68	ENSMUSG00000030249	1248.452141	639.0255677	1857.878714	2.907362096	1.539710763	4.10285e-05	0.008719161	6	142587862	142702315	-	8373	Abcc9
69	ENSMUSG00000024713	337.8946402	542.7867774	133.002503	0.245036373	-2.02893218	4.3845e-05	0.009182664	19	17432832	17837632	-	9346	Pcsk5
70	ENSMUSG00000057716	359.9664749	145.3205734	574.6123763	3.954102045	1.983350104	4.51421e-05	0.009319265	6	39873271	40255150	+	9729	Tmem178b
71	ENSMUSG00000068735	696.5016494	331.0614387	1061.94186	3.207688169	1.681533899	4.6703e-05	0.0095057	2	93187548	93201759	+	3690	Trp53i11
72	ENSMUSG00000021136	1386.912299	723.7157032	2050.108894	2.832754471	1.502205562	4.96556e-05	0.009966294	12	81026808	81186414	+	3496	Smoc1
73	ENSMUSG00000024747	1950.667505	2847.705806	1053.629204	0.369992294	-1.434432872	5.90018e-05	0.01167994	19	20692953	20727562	-	2066	Aldh1a7
74	ENSMUSG00000020649	7482.843036	10707.52781	4258.158261	0.397678935	-1.330323949	6.19173e-05	0.01209145	12	24708241	24714146	+	2771	Rrm2
75	ENSMUSG00000035799	37.05193427	74.10386854	0	0	-Inf	6.31631e-05	0.012170266	12	33957671	33959829	+	1628	Twist1
76	ENSMUSG00000059479	105.186029	189.5904169	20.7816411	0.109613352	-3.189504552	6.64413e-05	0.012633459	7	25626654	25635100	+	6474	B3gnt8
77	ENSMUSG00000053846	1871.738089	2729.332093	1014.144086	0.371572257	-1.428285307	6.73611e-05	0.012642015	18	74939322	74961263	-	3787	Lipg
78	ENSMUSG00000026923	71.04228749	133.7719185	8.312656439	0.062140519	-4.0083219	7.04379e-05	0.013049974	2	26457903	26516663	-	14232	Notch1
79	ENSMUSG00000030450	1100.989079	571.6584145	1630.319744	2.851912441	1.511929689	7.3465e-05	0.013438511	7	56239760	56536518	+	3961	Oca2
80	ENSMUSG00000041550	724.5989229	356.0835242	1093.114322	3.06982561	1.618156701	7.64656e-05	0.013812559	12	104101113	104106137	+	2162	Serpina5
81	ENSMUSG00000047631	554.3490393	260.8071218	847.8909568	3.251026855	1.700895473	8.51072e-05	0.015183756	10	128268671	128270153	+	1258	Apof
82	ENSMUSG00000022324	1265.328565	1858.371041	672.2860895	0.361760959	-1.466891374	8.83888e-05	0.015516632	15	34306677	34436273	+	6263	Matn2
83	ENSMUSG00000001473	738.2146089	1109.633252	366.7959654	0.330556032	-1.597033252	8.99345e-05	0.015516632	18	67390717	67402748	+	1757	Tubb6
84	ENSMUSG00000073491	47.23370141	92.38923871	2.07816411	0.022493573	-5.474343328	9.01942e-05	0.015516632	1	173566283	173599274	-	6840	Ifi213
85	ENSMUSG00000032324	69.27337399	8.661491129	129.8852569	14.99571551	3.906478456	0.000103494	0.017595276	9	56131725	56165477	-	4274	Tspan3
86	ENSMUSG00000022836	371.1316589	582.2446814	160.0186364	0.274830568	-1.863385619	0.00010579	0.017776407	16	34745210	35002420	+	11263	Mylk
87	ENSMUSG00000032741	1225.94117	656.34855	1795.533791	2.735640676	1.451878746	0.000109475	0.018161043	5	120534153	120588673	-	8462	Tpcn1
88	ENSMUSG00000033715	434.3066109	196.3271322	672.2860895	3.424315742	1.775815733	0.000110592	0.018161043	13	4049011	4090688	+	3239	Akr1c14
89	ENSMUSG00000039457	192.9303235	321.4375597	64.4230874	0.200421779	-2.318888809	0.000115166	0.018699617	16	5086291	5132421	-	6893	Ppl
90	ENSMUSG00000001918	2045.141092	2941.057432	1149.224753	0.390752231	-1.355673985	0.000133515	0.021438004	7	16781340	16798274	+	4173	Slc1a5
91	ENSMUSG00000032577	49.19682429	95.27640241	3.117246165	0.032717925	-4.933774947	0.000150484	0.023897156	9	107254927	107289877	-	5542	Mapkapk3
92	ENSMUSG00000025931	925.5648144	488.8930548	1362.236574	2.786369249	1.478386456	0.000154947	0.024338522	1	20890606	20939650	+	5488	Paqr8
93	ENSMUSG00000074604	130.2637796	225.1987693	35.32878986	0.156878255	-2.672282706	0.000167559	0.025813353	3	51660360	51682677	+	3703	Mgst2
94	ENSMUSG00000021069	1465.908512	2118.215775	813.6012489	0.384097436	-1.38045576	0.000167909	0.025813353	12	70190811	70231488	-	6895	Pygl
95	ENSMUSG00000061878	255.384103	409.9772468	100.7909593	0.245845251	-2.024177605	0.00017791	0.02692459	11	116530925	116536674	+	4774	Sphk1
96	ENSMUSG00000043822	211.1946647	345.4972572	76.89207206	0.222554797	-2.167767496	0.000179292	0.02692459	10	80339110	80348412	-	4722	Adamtsl5
97	ENSMUSG00000038507	137.6647652	39.45790403	235.8716265	5.977804251	2.579615655	0.000181435	0.02692459	6	39086410	39118349	-	3995	Parp12
98	ENSMUSG00000062563	62.34244929	117.4113242	7.273574384	0.061949513	-4.012763243	0.00018259	0.02692459	12	24665833	24681813	-	2952	Cys1
99	ENSMUSG00000044349	2715.691667	3858.213104	1573.170231	0.407745811	-1.294258039	0.000190373	0.027788674	2	158375638	158386145	+	8521	Snhg11
100	ENSMUSG00000060594	1652.312411	934.478654	2370.146167	2.536329917	1.342742419	0.000205595	0.029710502	9	51054640	51077094	-	2409	Layn
101	ENSMUSG00000026489	714.6719783	370.5193427	1058.824614	2.857677027	1.514842873	0.000211313	0.030234509	1	180165238	180199602	-	5293	Coq8a
102	ENSMUSG00000014602	2733.667787	1594.676756	3872.658818	2.42849142	1.280060389	0.000220483	0.031083611	1	93015464	93101951	-	9330	Kif1a
103	ENSMUSG00000051022	224.1460803	85.65252338	362.6396371	4.233846509	2.081968968	0.00022155	0.031083611	5	39613935	39755475	-	2230	Hs3st1
104	ENSMUSG00000070047	5464.90239	3263.45738	7666.347401	2.349148927	1.232138177	0.000230161	0.031981354	8	44935447	45052257	+	15655	Fat1
105	ENSMUSG00000032012	1031.11947	564.9216992	1497.317241	2.65048633	1.4062571	0.00024761	0.034078173	9	43743984	43807461	+	5653	Nectin1
106	ENSMUSG00000024087	144.2270632	44.26984355	244.1842829	5.515815357	2.463574163	0.000250008	0.034083646	17	79706953	79715041	-	5128	Cyp1b1
107	ENSMUSG00000021990	432.32617	206.9133992	657.7389407	3.178812698	1.668488013	0.0002707	0.03655966	14	60634001	60764556	+	9102	Spata13
108	ENSMUSG00000047746	102.9111815	25.02208548	180.8002775	7.225627843	2.85312295	0.000290987	0.038712278	16	36963460	36990467	-	5517	Fbxo40
109	ENSMUSG00000027820	7487.908561	4543.433291	10432.38383	2.296145484	1.199214054	0.000291996	0.038712278	3	63241537	63386030	+	11542	Mme
110	ENSMUSG00000027869	83.37891289	150.1325129	16.62531288	0.110737591	-3.174783046	0.000326054	0.042834628	3	98805504	98814443	-	1802	Hsd3b6
111	ENSMUSG00000032262	386.8923071	590.9061726	182.8784417	0.309488122	-1.692044054	0.000340702	0.044355747	9	83778692	83806277	-	3026	Elovl4
112	ENSMUSG00000072235	954.5552037	1378.139477	530.97093	0.385280981	-1.376017124	0.000391305	0.050417335	15	98949837	98953703	-	1803	Tuba1a
113	ENSMUSG00000086962	77.04669736	139.546246	14.54714877	0.104246077	-3.261934995	0.00039473	0.050417335	11	58063552	58093134	-	1462	Gm12248
114	ENSMUSG00000034707	2578.806214	3616.65374	1540.958687	0.426073049	-1.230827296	0.000397729	0.050417335	10	121365090	121397249	+	9442	Gns
115	ENSMUSG00000007038	984.1554352	1417.597381	550.7134891	0.388483709	-1.364073993	0.000411593	0.051721106	17	34931253	34935953	+	3733	Neu1
116	ENSMUSG00000022558	1620.506604	2293.370373	947.642834	0.413209678	-1.275054049	0.00042717	0.053215759	15	76380261	76453038	+	16468	Mroh1
117	ENSMUSG00000028766	530.2559426	787.2333048	273.2785804	0.347137982	-1.526418871	0.000450679	0.055418391	4	137741733	137796384	-	4033	Alpl
118	ENSMUSG00000022415	140.0323879	45.23223145	234.8325444	5.191708144	2.376209283	0.00045252	0.055418391	15	80091334	80119501	+	4808	Syngr1
119	ENSMUSG00000034881	225.9174678	93.35162661	358.4833089	3.840139931	1.941158882	0.000515649	0.062618843	10	81328731	81335172	+	1919	Tbxa2r
120	ENSMUSG00000046805	147.633768	50.04417097	245.2233649	4.900138422	2.292822504	0.000524406	0.063151565	19	12460779	12465284	+	4335	Mpeg1
121	ENSMUSG00000029672	979.0292971	555.2978201	1402.760774	2.52614133	1.336935356	0.000532082	0.063546459	6	22306520	22356243	-	3713	Fam3c
122	ENSMUSG00000054555	752.0084231	1089.423106	414.5937399	0.380562646	-1.393794134	0.000559761	0.066304151	7	133883199	134232146	-	10573	Adam12
123	ENSMUSG00000022261	1618.079605	2276.047391	960.1118187	0.421832965	-1.245256254	0.000576611	0.067744787	15	32920723	33034935	+	3527	Sdc2
124	ENSMUSG00000027556	75.23943679	15.39820645	135.0806671	8.772493573	3.132986986	0.00064656	0.075350357	3	14766216	14808368	-	1248	Car1
125	ENSMUSG00000023809	125.1957806	39.45790403	210.9336571	5.345789705	2.418403085	0.000654244	0.075635898	17	7170115	7303315	+	9978	Rps6ka2
126	ENSMUSG00000014599	886.9864191	505.2536492	1268.719189	2.511053985	1.328293045	0.000698568	0.080119121	3	107741048	107760469	-	5281	Csf1
127	ENSMUSG00000032633	590.7639173	859.4123975	322.115437	0.374808925	-1.415772787	0.000831393	0.094093475	11	59791408	59810016	-	4322	Flcn
128	ENSMUSG00000024251	2521.074073	1558.106015	3484.04213	2.236075142	1.16096867	0.000833435	0.094093475	17	84190056	84466196	-	7884	Thada
129	ENSMUSG00000037499	321.1369681	154.9444524	487.3294837	3.145188331	1.653146407	0.000857595	0.096070537	1	191306789	191318194	-	742	Nenf
130	ENSMUSG00000042155	855.8312755	491.7802185	1219.882332	2.480543719	1.310656385	0.00087698	0.097375591	2	69821944	69836651	+	4925	Klhl23
131	ENSMUSG00000006517	1645.964114	2293.370373	998.5578547	0.435410637	-1.199551443	0.000882721	0.097375591	8	122433601	122443422	-	1859	Mvd
132	ENSMUSG00000096001	50.27425342	94.31401451	6.234492329	0.066103562	-3.919128171	0.000905231	0.099050791	14	37102140	37114022	-	828	2610528A11Rik
133	ENSMUSG00000028763	2056.134333	2847.705806	1264.562861	0.44406373	-1.171161356	0.000911615	0.099050791	4	137468769	137570630	+	14307	Hspg2
134	ENSMUSG00000037583	467.6030057	247.3336911	687.8723203	2.781150911	1.47568203	0.000955553	0.103049939	4	133553376	133556536	+	1132	Nr0b2
135	ENSMUSG00000028211	781.1447788	1114.445192	447.8443656	0.401854096	-1.315256306	0.001019545	0.108007235	4	11156431	11174379	+	6475	Trp53inp1
136	ENSMUSG00000056268	353.5056111	177.0793742	529.931848	2.992623226	1.581410653	0.001023706	0.108007235	1	138963435	139178960	+	19408	Dennd1b
137	ENSMUSG00000022575	31.79714788	62.55521371	1.039082055	0.016610639	-5.91174864	0.001023942	0.108007235	15	75862327	75867408	+	2377	Gsdmd
138	ENSMUSG00000024843	794.3473059	457.134254	1131.560358	2.475334867	1.307623708	0.001044124	0.10933789	19	3851773	3894369	+	12024	Chka
139	ENSMUSG00000031383	350.9079059	177.0793742	524.7364377	2.963283782	1.567196794	0.001156938	0.120279981	X	73639419	73643514	+	2722	Dusp9
140	ENSMUSG00000038205	1193.912703	1668.780624	719.044782	0.430880352	-1.214640783	0.001178753	0.121055682	3	97658193	97673812	+	5096	Prkab2
141	ENSMUSG00000028613	747.7716898	1065.363409	430.1799707	0.403787071	-1.308333377	0.00118235	0.121055682	4	107802261	107876840	+	10514	Lrp8
142	ENSMUSG00000038393	4260.89451	2721.63299	5800.15603	2.131130851	1.091619177	0.001189531	0.121055682	3	96557957	96561883	+	3123	Txnip
143	ENSMUSG00000022014	43.96925195	4.811939516	83.12656439	17.27506427	4.110619173	0.001242592	0.12557128	14	77904239	78002657	+	2321	Epsti1
144	ENSMUSG00000031714	264.1371323	125.1104274	403.1638373	3.222463911	1.688164202	0.001344414	0.13491759	8	80764438	80880519	-	5082	Gab1
145	ENSMUSG00000017756	1938.407573	1212.608758	2664.206389	2.197086547	1.135591701	0.001360553	0.135595533	13	73733094	73816754	+	12669	Slc12a7
146	ENSMUSG00000034708	9377.270224	12645.77705	6108.7634	0.48306746	-1.04970342	0.001385969	0.137182411	11	102430315	102437048	+	3474	Grn
147	ENSMUSG00000079022	369.5557178	191.5151927	547.5962429	2.859283564	1.515653704	0.00141174	0.138782679	15	71795795	72034227	-	9203	Col22a1
148	ENSMUSG00000024085	1214.928138	1688.99077	740.8655051	0.438643904	-1.188877876	0.001451154	0.141693398	17	64600736	64755110	+	7223	Man2a1
149	ENSMUSG00000031387	299.9743302	451.3599266	148.5887338	0.329202317	-1.602953603	0.001527008	0.147842849	X	73922121	73930850	-	2494	Renbp
150	ENSMUSG00000044250	306.6665135	153.0196766	460.3133503	3.008197119	1.588899106	0.001534595	0.147842849	15	97247107	97385680	+	2197	Pced1b
151	ENSMUSG00000021477	45469.11742	60919.15427	30019.08056	0.492769161	-1.021016123	0.001547889	0.14813603	13	64359337	64370890	-	6489	Ctsl
152	ENSMUSG00000048794	125.0040452	44.26984355	205.7382469	4.647367833	2.216413837	0.001621934	0.154201094	6	90403479	90428797	-	4122	Cfap100
153	ENSMUSG00000036402	14987.80491	9894.310033	20081.29979	2.02958061	1.021181642	0.001704015	0.160945876	6	66896397	67021350	+	4727	Gng12
154	ENSMUSG00000027966	211.884912	328.174275	95.59554905	0.291295072	-1.7794468	0.001753598	0.164553569	3	114030540	114220718	+	12744	Col11a1
155	ENSMUSG00000068220	3742.841597	5057.348431	2428.334762	0.480159672	-1.058413857	0.001775776	0.165559571	15	78926725	78930465	+	903	Lgals1
156	ENSMUSG00000021096	2963.573351	4013.157556	1913.989145	0.476928483	-1.06815515	0.001852724	0.171626374	12	72757455	72799819	+	12829	Ppm1a
157	ENSMUSG00000036533	704.6337035	413.8267984	995.4406085	2.405452263	1.266308169	0.001868699	0.172003637	17	79333727	79355091	-	2309	Cdc42ep3
158	ENSMUSG00000026821	449.4190698	651.5366105	247.3015291	0.379566589	-1.397575088	0.001917903	0.175415332	2	28513125	28553081	+	6159	Ralgds
159	ENSMUSG00000038352	81.16467851	140.5086339	21.82072315	0.155298095	-2.686887963	0.001959332	0.178077419	11	97989578	97996181	-	2073	Arl5c
160	ENSMUSG00000026187	912.0851987	553.3730443	1270.797353	2.296456913	1.199409715	0.002037617	0.184034978	1	72307421	72394952	+	2555	Xrcc5
161	ENSMUSG00000037003	1889.899759	2573.425253	1206.374266	0.468781545	-1.093012321	0.002085302	0.186340838	15	102100413	102116401	+	5452	Tns2
162	ENSMUSG00000025810	2873.559157	1865.107756	3882.010557	2.081386742	1.057545057	0.002088936	0.186340838	8	128358604	128503363	+	9785	Nrp1
163	ENSMUSG00000079654	189.4135256	83.72774758	295.0993036	3.524510238	1.817422796	0.002105015	0.186623177	6	29169232	29179584	-	3411	Prrt4
164	ENSMUSG00000061540	32.79788286	63.51760161	2.07816411	0.032717925	-4.933774947	0.002131044	0.186684588	4	63362449	63365878	+	775	Orm2
165	ENSMUSG00000028179	1266.331774	1741.922105	790.7414437	0.453947649	-1.139402166	0.002131545	0.186684588	3	157894248	157925077	-	2791	Cth
166	ENSMUSG00000051079	148.8089203	59.66805	237.9497906	3.98789286	1.99562665	0.002155658	0.187659158	1	144138654	144177372	-	1655	Rgs13
167	ENSMUSG00000032009	3652.5231	2395.383491	4909.662709	2.049635362	1.035367272	0.002247383	0.194472684	9	14275067	14333101	+	15269	Sesn3
168	ENSMUSG00000025888	66.97997146	118.3737121	15.58623082	0.131669697	-2.925004737	0.002320261	0.199583849	9	5298517	5307265	+	1497	Casp1
169	ENSMUSG00000031209	1676.038117	2281.821718	1070.254516	0.469035117	-1.092232153	0.002359514	0.201701365	X	96455359	96574485	+	7662	Heph
170	ENSMUSG00000022564	1887.242678	2561.876598	1212.608758	0.473328325	-1.079086838	0.002372793	0.201701365	15	76246764	76249904	+	2067	Grina
171	ENSMUSG00000044716	1076.815577	669.8219806	1483.809174	2.215229146	1.147455941	0.002459129	0.207385191	5	35056766	35087839	+	4275	Dok7
172	ENSMUSG00000034349	4508.726713	6033.209765	2984.243662	0.494636152	-1.015560408	0.002468359	0.207385191	3	69004738	69034623	+	5210	Smc4
173	ENSMUSG00000030844	97.96688274	31.7588008	164.1749647	5.16943211	2.370005801	0.002485974	0.207657904	7	128373621	128418758	-	1711	Rgs10
174	ENSMUSG00000061353	5337.512167	7125.520035	3549.504299	0.498139684	-1.005377748	0.00255087	0.211854191	6	117168535	117181367	+	8176	Cxcl12
175	ENSMUSG00000022040	119.0219014	194.4023564	43.6414463	0.224490315	-2.155274887	0.002652901	0.218762613	14	66084374	66124500	-	2484	Ephx2
176	ENSMUSG00000028041	413.640011	597.6428879	229.6371341	0.384238044	-1.379927726	0.002679867	0.218762613	3	89338542	89349996	-	6145	Adam15
177	ENSMUSG00000036960	102.5277108	34.64596451	170.409457	4.918594687	2.298246176	0.002691162	0.218762613	3	145070263	145099443	-	4646	Clca2
178	ENSMUSG00000036617	206.0598675	96.23879032	315.8809447	3.282262211	1.714690496	0.002709243	0.218762613	2	19909780	20810713	+	16067	Etl4
179	ENSMUSG00000050052	1171.285454	737.1891338	1605.381775	2.17770678	1.122809714	0.002709744	0.218762613	8	13952008	13975032	-	4695	Tdrp
180	ENSMUSG00000050271	342.846361	183.8160895	501.8766325	2.730319385	1.449069723	0.002736247	0.219675024	8	36094828	36147787	+	9606	Prag1
181	ENSMUSG00000018740	474.4757913	270.4310008	678.5205818	2.509034023	1.327132034	0.002757038	0.22012129	11	68968131	68974365	+	3677	Slc25a35
182	ENSMUSG00000052102	890.7654615	1231.856516	549.674407	0.44621626	-1.16418501	0.002847518	0.22485063	18	38327558	38339003	-	2392	Gnpda1
183	ENSMUSG00000025056	21.82072315	0	43.6414463	Inf	Inf	0.002854659	0.22485063	X	86191764	86195947	+	1808	Nr0b1
184	ENSMUSG00000044365	1149.443702	724.6780911	1574.209313	2.172287713	1.119215196	0.002862952	0.22485063	3	134236484	134262161	+	13401	Cxxc4
185	ENSMUSG00000006958	67.49951248	118.3737121	16.62531288	0.140447677	-2.831895333	0.002917786	0.227918477	16	20733127	20742384	+	6258	Chrd
186	ENSMUSG00000053617	272.3941237	139.546246	405.2420014	2.903997873	1.538040396	0.003036982	0.235953886	19	47260174	47464411	-	10464	Sh3pxd2a
187	ENSMUSG00000026547	1110.495443	1519.610499	701.380387	0.461552738	-1.115432591	0.003104802	0.239933121	1	172500047	172507380	+	2082	Tagln2
188	ENSMUSG00000030688	53.31480543	96.23879032	10.39082055	0.107969152	-3.211308922	0.003212132	0.246906992	7	101317086	101346626	+	2419	Stard10
189	ENSMUSG00000000957	130.8773328	209.8005629	51.95410274	0.247635669	-2.013708962	0.003328713	0.254514474	14	54431612	54445364	+	5960	Mmp14
190	ENSMUSG00000016024	716.7625124	996.0714798	437.4535451	0.439178868	-1.187119457	0.003401821	0.258735355	2	158306493	158332852	+	4831	Lbp
191	ENSMUSG00000036368	2547.99372	1690.915546	3405.071894	2.013744508	1.009880654	0.003523067	0.265910487	17	79611863	79693192	+	4223	Rmdn2
192	ENSMUSG00000036502	99.93000562	34.64596451	165.2140467	4.768637532	2.253577127	0.003532961	0.265910487	X	38196573	38252439	-	4490	Tmem255a
193	ENSMUSG00000033965	421.722585	603.4172153	240.0279547	0.397781085	-1.329953419	0.003593126	0.269037603	X	103697414	103821983	-	4263	Slc16a2
195	ENSMUSG00000079554	772.2408352	477.3444	1067.13727	2.235570943	1.160643329	0.00366114	0.269140174	1	58278326	58380259	+	5771	Aox2
196	ENSMUSG00000024112	32.6160435	2.88716371	62.34492329	21.59383033	4.432547268	0.00367823	0.269140174	17	25374285	25433783	-	9763	Cacna1h
197	ENSMUSG00000028444	218.5622512	330.0990508	107.0254516	0.324222234	-1.624945066	0.003686946	0.269140174	4	41657498	41697089	-	2782	Cntfr
198	ENSMUSG00000039166	996.3003252	630.3640766	1362.236574	2.161031417	1.111720046	0.003687617	0.269140174	10	25169090	25307870	-	4375	Akap7
199	ENSMUSG00000037129	165.8981091	74.10386854	257.6923496	3.477448002	1.798028942	0.003709286	0.269361267	9	45319100	45347581	+	3245	Tmprss13
201	ENSMUSG00000039323	2364.86293	3157.59471	1572.131149	0.497888834	-1.006104434	0.00383972	0.276058691	1	72824503	72852474	+	1847	Igfbp2
203	ENSMUSG00000089809	161.818475	72.17909274	251.4578573	3.483804627	1.800663719	0.003987597	0.283865803	5	99217426	99729065	-	13805	Rasgef1b
204	ENSMUSG00000025213	88.21064444	28.8716371	147.5496518	5.110539846	2.353475697	0.004058591	0.28667117	19	45075241	45079289	+	1681	Kazald1
205	ENSMUSG00000058952	39.16844546	73.14148064	5.195410274	0.071032337	-3.815380246	0.00406668	0.28667117	3	129835884	129875332	+	2220	Cfi
206	ENSMUSG00000032726	29.4295252	56.78088629	2.07816411	0.036599712	-4.772023877	0.004456334	0.312613962	4	123312645	123343252	-	2405	Bmp8a
207	ENSMUSG00000041445	80.31733183	135.6966943	24.93796932	0.183777279	-2.443969679	0.004500144	0.314162211	14	34375465	34404287	+	3974	Mmrn2
208	ENSMUSG00000037347	80.05137631	25.02208548	135.0806671	5.398457584	2.432547268	0.004587853	0.31874551	X	20059560	20097521	+	2206	Chst7
209	ENSMUSG00000041115	1652.219635	1093.272658	2211.166613	2.022520728	1.016154489	0.004651466	0.320117867	X	152144268	152225236	+	6980	Iqsec2
212	ENSMUSG00000056531	617.3755509	856.5252338	378.225868	0.441581699	-1.179247713	0.004701341	0.320467348	5	108132875	108233628	+	6433	Ccdc18
214	ENSMUSG00000031523	278.2451452	149.170125	407.3201655	2.730574675	1.449204612	0.00482183	0.325608746	8	36567751	36953143	-	14694	Dlc1
215	ENSMUSG00000059898	1313.407139	860.3747854	1766.439493	2.053104674	1.037807183	0.004845772	0.325703463	18	19960930	20002351	-	5403	Dsc3
217	ENSMUSG00000032796	1173.328982	764.1359951	1582.52197	2.070995189	1.050324202	0.004950497	0.329675697	17	67697259	67822647	+	9681	Lama1
218	ENSMUSG00000056973	90.65248727	150.1325129	31.17246165	0.207632984	-2.267892451	0.005029113	0.333374858	8	93166068	93197838	-	2369	Ces1d
219	ENSMUSG00000042514	837.5953854	532.2005105	1142.99026	2.147668478	1.102771311	0.005056705	0.333673255	18	21550377	21654718	-	4425	Klhl14
221	ENSMUSG00000008136	558.9593474	340.6853177	777.233377	2.281382075	1.189908082	0.005191508	0.339468275	1	43123074	43196984	-	1897	Fhl2
224	ENSMUSG00000027217	749.3439199	1025.905505	472.782335	0.46084394	-1.117649815	0.005361835	0.343619532	2	93201760	93334505	-	8175	Tspan18
225	ENSMUSG00000031608	1424.927858	943.1401451	1906.715571	2.021667279	1.015545581	0.005365028	0.343619532	8	57523828	57653032	-	5253	Galnt7
226	ENSMUSG00000039485	309.479457	447.510375	171.4485391	0.383116345	-1.384145519	0.005417227	0.343619532	10	34297442	34301320	+	3879	Tspyl4
227	ENSMUSG00000059493	85.6129393	28.8716371	142.3542415	4.93059126	2.30176066	0.005420326	0.343619532	X	161833296	162159730	-	8805	Nhs
228	ENSMUSG00000045672	434.0072563	255.9951822	612.0193303	2.390745501	1.257460561	0.005421442	0.343619532	4	63214004	63334991	+	13022	Col27a1
229	ENSMUSG00000037341	47.93384479	9.623879032	86.24381055	8.961439589	3.163730509	0.005449138	0.343866803	X	20105754	20291807	-	3820	Slc9a7
230	ENSMUSG00000026189	502.2662883	303.1521895	701.380387	2.313624679	1.210154846	0.005531081	0.347520213	1	72259167	72284314	-	1516	Pecr
231	ENSMUSG00000036111	27.4589803	1.924775806	52.9931848	27.53213368	4.783044515	0.005654653	0.353746278	7	109138572	109175207	-	1552	Lmo1
233	ENSMUSG00000050503	90.17376732	31.7588008	148.5887338	4.678663239	2.22609639	0.005763286	0.357335225	9	66508459	66514593	-	3935	Fbxl22
234	ENSMUSG00000028644	45.37448673	8.661491129	82.08748233	9.477292202	3.244474919	0.005793797	0.357335225	4	119175457	119190011	-	5297	Ermap
236	ENSMUSG00000058013	1025.540589	1382.951417	668.1297613	0.483118751	-1.049550246	0.005862714	0.358180857	5	93093437	93176447	+	9472	Sept11
237	ENSMUSG00000051159	330.7460031	474.4572363	187.0347699	0.394207856	-1.342971567	0.005890304	0.358180857	X	102247381	102252181	-	1754	Cited1
238	ENSMUSG00000017144	704.4456791	444.6232113	964.2681469	2.168731012	1.116851126	0.005909168	0.358180857	2	51130438	51149111	-	4432	Rnd3
245	ENSMUSG00000054889	64.73357501	18.28537016	111.1817799	6.080368015	2.604158646	0.00632265	0.371605953	13	38151294	38198577	+	9659	Dsp
246	ENSMUSG00000017057	87.61440926	30.7964129	144.4324056	4.689910026	2.229560245	0.006325864	0.371605953	X	36112110	36171259	+	3712	Il13ra1
247	ENSMUSG00000052981	40.25577061	6.736715322	73.77482589	10.95115681	3.45301137	0.006409175	0.374975662	13	69702832	69739889	-	2674	Ube2ql1
248	ENSMUSG00000031861	177.3750178	268.506225	86.24381055	0.321198552	-1.638462708	0.006519937	0.379368276	8	69822429	69831102	+	5837	Lpar2
249	ENSMUSG00000024990	80.49422318	26.94686129	134.0415851	4.974293059	2.314491506	0.006536759	0.379368276	19	38116620	38125321	-	1297	Rbp4
250	ENSMUSG00000071757	546.5880859	755.474504	337.7016678	0.447006042	-1.161633763	0.006626311	0.382246748	15	57694665	57839832	+	4434	Zhx2
252	ENSMUSG00000025083	129.5871393	203.0638476	56.11043096	0.276319156	-1.855592514	0.006682975	0.383236813	19	56912361	57008228	-	5675	Afap1l2
253	ENSMUSG00000027947	144.3680815	223.2739935	65.46216946	0.293192093	-1.770081899	0.006767944	0.385134861	3	89864059	89913196	-	8642	Il6ra
255	ENSMUSG00000034892	698.2643779	951.8016362	444.7271195	0.467247694	-1.097740552	0.006919115	0.391050122	12	69157722	69159186	-	693	Rps29
257	ENSMUSG00000050612	688.0887957	437.8864959	938.2910955	2.142772395	1.099478615	0.006954528	0.391050122	17	65637507	65642168	-	1987	Txndc2
258	ENSMUSG00000000530	50.45485578	11.54865484	89.36105672	7.737789203	2.951921427	0.00704424	0.394559339	15	101128522	101145336	+	4265	Acvrl1
259	ENSMUSG00000038702	683.0084267	434.9993322	931.0175211	2.140273449	1.097795132	0.00711992	0.397258553	1	111858702	111864918	-	5763	Dsel
260	ENSMUSG00000037996	41.16991542	75.06625645	7.273574384	0.096895393	-3.367428124	0.007158184	0.397857393	4	86983124	87230477	-	12217	Slc24a2
262	ENSMUSG00000022231	34.61751346	4.811939516	64.4230874	13.38817481	3.742887388	0.00743663	0.408656189	15	32244810	32696341	+	18686	Sema5a
263	ENSMUSG00000042207	307.1885285	439.8112718	174.5657852	0.396910667	-1.33311376	0.007437311	0.408656189	1	134560171	134635285	+	16555	Kdm5b
264	ENSMUSG00000070337	243.6066027	131.8471427	355.3660628	2.695288312	1.430439605	0.007590905	0.415515772	11	97332109	97352077	-	9542	Gpr179
265	ENSMUSG00000021390	47.54047801	84.69013548	10.39082055	0.122692218	-3.026884351	0.007853947	0.428292024	13	49608046	49624501	+	2566	Ogn
266	ENSMUSG00000030428	226.8835667	121.2608758	332.5062576	2.742073693	1.455267344	0.008010147	0.435167802	7	4119408	4136708	+	6379	Ttyh1
267	ENSMUSG00000025020	467.0698577	286.7915951	647.3481202	2.257207433	1.174539005	0.008059024	0.43618336	19	41600257	41743665	-	5921	Slit1
269	ENSMUSG00000062380	846.5463351	555.2978201	1137.79485	2.048981301	1.034906819	0.008308648	0.445084787	8	123411424	123422015	+	1868	Tubb3
270	ENSMUSG00000027230	727.1323039	983.5604371	470.7041708	0.47857168	-1.063193068	0.008352808	0.445084787	2	91982328	92024502	-	2603	Creb3l1
273	ENSMUSG00000034591	250.1305536	137.6214702	362.6396371	2.635051324	1.397831062	0.008448788	0.447228699	10	83230848	83337882	-	5349	Slc41a2
274	ENSMUSG00000031616	18.28537016	36.57074032	0	0	-Inf	0.008617019	0.45446912	8	77663031	77724464	-	5476	Ednra
275	ENSMUSG00000064252	199.5185986	103.9378935	295.0993036	2.839188803	1.50547879	0.008743004	0.458147114	11	58539801	58546422	-	4075	Olfr329-ps
276	ENSMUSG00000064280	29.46787227	55.81849838	3.117246165	0.055846113	-4.162399322	0.008750163	0.458147114	5	21292961	21424677	-	4371	Ccdc146
277	ENSMUSG00000024981	97.17891218	38.49551613	155.8623082	4.048843188	2.017509768	0.00910542	0.475026802	19	55251938	55297720	+	4864	Acsl5
278	ENSMUSG00000032306	323.123594	457.134254	189.112934	0.413692329	-1.27336989	0.009358997	0.485528567	9	57544256	57552763	-	3142	Mpi
280	ENSMUSG00000042428	697.1275726	941.2153693	453.0397759	0.481334868	-1.054887157	0.009407515	0.485528567	15	80173721	80215519	+	4665	Mgat3
281	ENSMUSG00000040852	376.9690735	227.1235452	526.8146018	2.319506775	1.21381806	0.009553601	0.488603952	17	84511895	84622142	+	6886	Plekhh2
282	ENSMUSG00000037795	405.7776235	247.3336911	564.2215558	2.281215928	1.189803011	0.009563986	0.488603952	5	65763521	65830108	+	14946	N4bp2
283	ENSMUSG00000049387	132.1452603	60.6304379	203.6600828	3.359040274	1.748049093	0.009568536	0.488603952	5	71442824	71548205	-	542	Cox7b2
285	ENSMUSG00000039405	220.2062275	119.3361	321.0763549	2.690521602	1.42788589	0.009937238	0.503870277	7	89507783	89527187	-	3767	Prss23
286	ENSMUSG00000039328	30.49953231	3.849551613	57.14951302	14.84575835	3.891978886	0.010078478	0.507784447	8	31111820	31131482	+	9012	Rnf122
287	ENSMUSG00000041476	192.8796064	101.0507298	284.708483	2.81748072	1.494405738	0.010084709	0.507784447	X	157698910	157752591	+	2275	Smpx
289	ENSMUSG00000026288	39.69788251	7.699103225	71.69666178	9.312339332	3.219143629	0.010339166	0.516128501	1	87620312	87720507	+	7602	Inpp5d
290	ENSMUSG00000047171	17.14485391	0	34.28970781	Inf	Inf	0.010357571	0.516128501	8	46292039	46294671	-	2012	Helt
291	ENSMUSG00000030004	112.8628662	49.08178306	176.6439493	3.598971722	1.847584767	0.010456871	0.519286069	6	85830388	85832082	-	1123	Nat8
293	ENSMUSG00000021054	326.164146	459.0590298	193.2692622	0.421011786	-1.248067472	0.010602471	0.522922571	12	75714249	75735729	-	5649	Sgpp1
295	ENSMUSG00000032548	80.89872298	29.834025	131.963421	4.423252343	2.145107549	0.010890447	0.533085478	9	102988712	103096002	+	13545	Slco2a1
297	ENSMUSG00000037541	32.53934935	4.811939516	60.26675918	12.52442159	3.646672073	0.010998275	0.534959274	7	144001928	144424494	+	10768	Shank2
298	ENSMUSG00000002603	229.3959186	332.0238266	126.7680107	0.381803957	-1.389096041	0.011031615	0.534959274	7	25687002	25705077	+	5042	Tgfb1
300	ENSMUSG00000028970	628.6310362	847.8637427	409.3983296	0.482858635	-1.050327217	0.011267017	0.541858328	5	8798147	8866315	+	7990	Abcb1b
303	ENSMUSG00000041608	28.02429042	52.93133467	3.117246165	0.058892265	-4.08577804	0.01172642	0.55926896	9	120539818	120568327	+	3755	Entpd3
304	ENSMUSG00000025648	370.6987081	514.8775282	226.519888	0.439949067	-1.184591584	0.011827792	0.562107283	9	108991778	109032228	+	4875	Pfkfb4
305	ENSMUSG00000038526	96.25239735	153.0196766	39.48511808	0.258039482	-1.954336269	0.011863727	0.562107283	3	95897768	95904691	-	2543	Car14
308	ENSMUSG00000061175	346.5066512	483.1187274	209.8945751	0.434457543	-1.202712899	0.012145573	0.568643277	3	79455974	79567796	-	8364	Fnip2
310	ENSMUSG00000025656	309.458428	434.9993322	183.9175237	0.422799554	-1.24195424	0.012244873	0.569282557	X	95048935	95196856	-	8776	Arhgef9
311	ENSMUSG00000010830	187.9786027	276.2053282	99.75187727	0.361151169	-1.469325253	0.012251531	0.569282557	15	79516411	79527739	+	1411	Kdelr3
312	ENSMUSG00000027796	118.9241782	183.8160895	54.03226685	0.293947429	-1.766369937	0.012320813	0.570666904	3	54755582	54801257	+	5368	Smad9
313	ENSMUSG00000029070	21.21088095	41.38267984	1.039082055	0.025109105	-5.315645582	0.012639017	0.583534928	4	155839680	155844088	+	2918	Mxra8
315	ENSMUSG00000010476	16.84178831	33.68357661	0	0	-Inf	0.012727505	0.583889445	7	137193673	137314445	-	9227	Ebf3
317	ENSMUSG00000053886	699.4840623	464.8333572	934.1347673	2.009612161	1.006917099	0.012985321	0.591958592	8	68276567	68347699	+	2723	Sh2d4a
318	ENSMUSG00000069670	44.17212035	77.95342016	10.39082055	0.133295249	-2.907302735	0.013118647	0.595131654	10	31689310	32890462	-	4710	Nkain2
321	ENSMUSG00000029314	137.1885193	207.8757871	66.50125151	0.319908598	-1.644268329	0.01323102	0.595165563	5	100845713	100899102	+	3502	Gpat3
323	ENSMUSG00000003559	72.65657568	119.3361	25.97705137	0.217679741	-2.199720948	0.013357802	0.597627245	19	46707443	46741095	+	1751	As3mt
324	ENSMUSG00000060807	57.91398053	98.16356612	17.66439493	0.179948586	-2.474343328	0.01350938	0.602543347	12	103646630	103657212	-	1761	Serpina6
326	ENSMUSG00000025978	489.3371387	314.7008443	663.973433	2.1098559	1.077144468	0.013818327	0.610844958	1	55170159	55226782	-	5871	Rftn2
329	ENSMUSG00000017491	16.36059435	32.72118871	0	0	-Inf	0.014499791	0.636562936	14	16430839	16819156	-	5265	Rarb
330	ENSMUSG00000026840	73.65731066	120.2984879	27.01613343	0.224575835	-2.154725394	0.014536417	0.636562936	2	31887291	31946539	+	6091	Lamc3
333	ENSMUSG00000027313	530.5342682	715.0542121	346.0143243	0.483899428	-1.047220861	0.01477791	0.640244238	2	119351229	119354381	+	1637	Chac1
335	ENSMUSG00000029338	364.4431867	502.3664855	226.519888	0.450905653	-1.149102499	0.014988602	0.64377648	5	97882783	98031043	-	6655	Antxr2
337	ENSMUSG00000032776	383.2270689	526.426183	240.0279547	0.455957478	-1.133028809	0.015012987	0.64377648	7	72077830	72306608	-	12351	Mctp2
338	ENSMUSG00000030873	28.42136821	3.849551613	52.9931848	13.76606684	3.783044515	0.015162479	0.647891579	7	121865038	121918514	+	2633	Scnn1b
339	ENSMUSG00000033491	69.7310649	114.5241605	24.93796932	0.217752911	-2.19923609	0.015198619	0.647891579	9	86743649	86758443	+	3444	Prss35
342	ENSMUSG00000079173	71.18083176	25.98447339	116.3771901	4.478720366	2.163086593	0.015436832	0.651475927	5	137378637	137477064	-	19813	Zan
345	ENSMUSG00000006205	89.94368487	37.53312822	142.3542415	3.792762507	1.923249037	0.015771713	0.659666276	7	130936111	130985660	+	2879	Htra1
346	ENSMUSG00000071637	252.2977819	357.0459121	147.5496518	0.4132512	-1.274909084	0.015794376	0.659666276	16	15887286	15891031	+	3746	Cebpd
352	ENSMUSG00000074923	349.2973288	217.4996661	481.0949914	2.21193439	1.145308594	0.016439194	0.672359244	2	118663303	118698020	+	5211	Pak6
353	ENSMUSG00000038745	44.73990448	11.54865484	77.93115411	6.748071979	2.754475362	0.016476172	0.672359244	7	140920902	140929192	+	5081	Nlrp6
355	ENSMUSG00000034501	485.1523594	654.4237742	315.8809447	0.482685619	-1.05084425	0.016548016	0.672359244	12	72536383	72580119	+	4300	Pcnx4
357	ENSMUSG00000078512	65.58092169	23.09730968	108.0645337	4.678663239	2.22609639	0.016687261	0.675483514	4	143894237	143900380	-	2087	Pramef6
360	ENSMUSG00000044734	479.5425533	312.7760685	646.3090381	2.066363457	1.047094035	0.017151425	0.688486793	13	32842092	32851185	-	2303	Serpinb1a
367	ENSMUSG00000046879	15.0666898	0	30.13337959	Inf	Inf	0.018471926	0.727039413	11	48861968	48871683	-	5810	Irgm1
368	ENSMUSG00000025934	348.7765507	478.3067879	219.2463136	0.458380101	-1.12538368	0.018514325	0.727039413	1	21240589	21265661	+	4344	Gsta3
369	ENSMUSG00000006931	96.36743857	150.1325129	42.60236425	0.283765078	-1.817231042	0.018581195	0.727687951	11	100408456	100414836	-	2178	P3h4
370	ENSMUSG00000032589	137.9962819	70.25431693	205.7382469	2.92847836	1.550151234	0.01863227	0.727716023	9	108096022	108190384	-	15938	Bsn
371	ENSMUSG00000025515	162.9775463	238.6722	87.28289261	0.365701965	-1.451259715	0.018768822	0.7298746	7	141690340	141754693	+	7127	Muc2
375	ENSMUSG00000041420	239.5566567	337.798154	141.3151595	0.418342012	-1.257245206	0.019190294	0.739517188	7	16175090	16186504	+	3173	Meis3
376	ENSMUSG00000025314	22.69280988	43.30745564	2.07816411	0.04798629	-4.381233924	0.019272046	0.740051605	2	90429754	90580647	-	8352	Ptprj
377	ENSMUSG00000031558	329.0302807	452.3223145	205.7382469	0.454848767	-1.136541154	0.019320778	0.740051605	5	47983138	48307733	+	25433	Slit2
378	ENSMUSG00000027845	427.4338253	577.4327419	277.4349086	0.480462725	-1.057503586	0.019357796	0.740051605	3	103800605	103809444	-	8405	Dclre1b
379	ENSMUSG00000079009	32.95127116	59.66805	6.234492329	0.104486276	-3.258614637	0.019421687	0.740535106	2	150181755	150193279	+	1728	Gm14139
390	ENSMUSG00000023345	221.8118566	313.7384564	129.8852569	0.413992146	-1.272324697	0.020917695	0.769579488	9	106281061	106350521	+	3336	Poc1a
391	ENSMUSG00000050447	425.8516991	278.130104	573.5732943	2.062248156	1.044217947	0.02091794	0.769579488	2	50066429	50193569	+	3729	Lypd6
392	ENSMUSG00000037578	61.98248157	22.13492177	101.8300414	4.600424723	2.201767061	0.020967046	0.769579488	19	44147637	44192442	-	3530	Pkd2l1
393	ENSMUSG00000045404	32.47007721	58.70566209	6.234492329	0.106199166	-3.235155664	0.02109258	0.769579488	12	99964499	100062682	+	3112	Kcnk13
395	ENSMUSG00000003541	397.8335937	537.9748379	257.6923496	0.479004465	-1.06188899	0.021142721	0.769579488	17	35821684	35822923	+	1131	Ier3
397	ENSMUSG00000070803	302.393907	416.7139621	188.0738519	0.451326015	-1.147758155	0.021190778	0.769579488	4	120666572	120667820	+	1249	Cited4
398	ENSMUSG00000047446	483.9005129	646.7246709	321.0763549	0.496465296	-1.010235222	0.021195255	0.769579488	12	40005447	40038025	-	7701	Arl4a
399	ENSMUSG00000039384	195.1371359	279.0924919	111.1817799	0.398368939	-1.327822931	0.021273485	0.769715669	1	184013302	184075636	+	3042	Dusp10
400	ENSMUSG00000072662	241.5494677	144.3581855	338.7407499	2.346529563	1.230528636	0.021305534	0.769715669	6	147075060	147087032	-	1278	Mansc4
401	ENSMUSG00000020083	14.9170125	29.834025	0	0	-Inf	0.021462134	0.773439641	10	62107655	62143920	-	2981	Fam241b
403	ENSMUSG00000057948	58.42238853	20.21014597	96.6346311	4.781491003	2.257460561	0.021674444	0.777214383	11	116062095	116077961	-	4679	Unc13d
404	ENSMUSG00000053930	410.1677451	267.5438371	552.7916532	2.066172255	1.046960535	0.021818318	0.780436909	11	66211725	66525964	-	7449	Shisa6
405	ENSMUSG00000087651	227.3857897	134.7343064	320.0372729	2.375321337	1.248122696	0.02210037	0.788573937	10	83722865	83762762	+	3465	1500009L16Rik
406	ENSMUSG00000050818	80.22579365	33.68357661	126.7680107	3.763496144	1.912073493	0.022399224	0.795593935	11	58527186	58534836	-	2913	Olfr330
407	ENSMUSG00000024818	329.3803524	208.838175	449.9225297	2.154407496	1.107291155	0.02240722	0.795593935	19	5877808	5885766	+	2650	Slc25a45
413	ENSMUSG00000039601	18.14558888	0.962387903	35.32878986	36.70951157	5.198082014	0.022925487	0.80131743	17	43801351	44039516	+	4372	Rcan2
415	ENSMUSG00000046719	168.2484137	93.35162661	243.1452008	2.604616649	1.38107105	0.023140725	0.803088759	11	95509845	95514570	-	2099	Nxph3
417	ENSMUSG00000045092	389.4999083	525.4637951	253.5360214	0.482499506	-1.051400631	0.023174037	0.803088759	3	115710433	115715072	-	3046	S1pr1
418	ENSMUSG00000053675	23.78384603	2.88716371	44.68052836	15.47557841	3.951921427	0.023265511	0.804329889	2	121046111	121085841	-	3155	Tgm5
420	ENSMUSG00000002885	90.516417	140.5086339	40.52420014	0.288410748	-1.793803167	0.023599194	0.811980841	8	83723251	83741326	-	3757	Adgre5
422	ENSMUSG00000038065	107.7800231	163.6059435	51.95410274	0.317556328	-1.654915574	0.023767669	0.812549946	6	54681624	54703851	+	5695	Mturn
423	ENSMUSG00000021822	354.8960018	481.1939516	228.5980521	0.475064267	-1.073805398	0.023784999	0.812549946	14	20836660	20843385	+	2367	Plau
425	ENSMUSG00000002980	165.0557104	238.6722	91.43922083	0.383116345	-1.384145519	0.024044771	0.817578802	7	19756131	19771016	-	3199	Bcam
426	ENSMUSG00000047773	14.02760774	0	28.05521548	Inf	Inf	0.024699149	0.837857736	11	89390223	89777653	-	6173	Ankfn1
432	ENSMUSG00000059743	416.2896702	557.2225959	275.3567445	0.49415933	-1.016951816	0.025365347	0.846292253	3	89093588	89101959	-	4208	Fdps
433	ENSMUSG00000052512	53.82321344	18.28537016	89.36105672	4.88702476	2.288956414	0.025388376	0.846292253	7	48908716	49610090	+	32228	Nav2
434	ENSMUSG00000031722	24.17473881	45.23223145	3.117246165	0.06891648	-3.859007178	0.025416292	0.846292253	8	109575128	109579172	-	1606	Hp
435	ENSMUSG00000005951	158.1656068	229.048321	87.28289261	0.381067594	-1.391881168	0.025569432	0.848327597	11	73199460	73224511	+	2985	Shpk
440	ENSMUSG00000039720	26.61905564	49.08178306	4.156328219	0.084681688	-3.561806169	0.025885812	0.848327597	8	27197459	27223828	-	1822	Got1l1
442	ENSMUSG00000022262	68.02523852	26.94686129	109.1036158	4.048843188	2.017509768	0.025973657	0.848456154	15	28203752	28472052	+	15637	Dnah5
443	ENSMUSG00000060044	91.03595803	140.5086339	41.56328219	0.295805895	-1.757277291	0.026009693	0.848456154	10	68723646	68782650	+	5282	Tmem26
445	ENSMUSG00000079547	114.2272799	171.3050468	57.14951302	0.333612547	-1.583754545	0.026304052	0.854201923	17	34153072	34160230	+	1485	H2-DMb1
448	ENSMUSG00000050989	62.9560025	102.0131177	23.89888726	0.234272688	-2.093739326	0.026756606	0.863079708	4	134537892	134552166	-	3619	Selenon
449	ENSMUSG00000035910	294.4140042	186.7032532	402.1247552	2.153817613	1.106896087	0.027168231	0.874405592	13	25056004	25210706	+	8284	Dcdc2a
451	ENSMUSG00000032060	131.5292331	193.4399685	69.61849767	0.359897172	-1.474343328	0.02801755	0.896108267	9	50751325	50756636	+	1479	Cryab
453	ENSMUSG00000031698	98.39241158	47.15700726	149.6278159	3.172970988	1.66583433	0.028235672	0.900736644	8	85324303	85386345	-	4283	Mylk3
454	ENSMUSG00000040624	206.5447725	123.1856516	289.9038933	2.353390103	1.234740485	0.028346529	0.902281263	10	3740364	3967303	+	8739	Plekhg1
455	ENSMUSG00000098134	190.3796245	111.6369968	269.1222522	2.410690542	1.269446465	0.028590711	0.90805354	12	84417196	84418578	+	1383	Rnf113a2
457	ENSMUSG00000033633	33.46339018	7.699103225	59.22767713	7.692802057	2.943509187	0.028859825	0.912589355	8	111058920	111092426	-	3653	Clec18a
459	ENSMUSG00000003948	118.7114138	176.1169863	61.30584124	0.348097265	-1.522437616	0.029713342	0.93119253	11	90249456	90278589	+	3581	Mmd
461	ENSMUSG00000041607	46.25028446	77.95342016	14.54714877	0.186613349	-2.421875908	0.029718432	0.93119253	18	82475146	82585637	+	8403	Mbp
462	ENSMUSG00000032826	275.9109216	377.256058	174.5657852	0.462724936	-1.111773249	0.029770324	0.93119253	3	126921612	127499350	-	35004	Ank2
465	ENSMUSG00000048126	73.32950501	115.4865484	31.17246165	0.269922879	-1.889380827	0.030529357	0.948773633	1	90765923	90843971	-	11963	Col6a3
466	ENSMUSG00000004446	335.3031201	451.3599266	219.2463136	0.485746077	-1.041725751	0.030770289	0.953458767	6	120891930	120916853	-	3550	Bid
470	ENSMUSG00000039158	280.3950555	382.0679976	178.7221134	0.46777567	-1.09611127	0.031250257	0.960845668	4	63367125	63403354	-	5765	Akna
471	ENSMUSG00000026482	76.29336287	119.3361	33.25062576	0.278630069	-1.843577138	0.031335984	0.961435886	1	152516760	152766351	-	6907	Rgl1
474	ENSMUSG00000039982	171.1355774	99.12595403	243.1452008	2.452891407	1.294483365	0.03180062	0.965895241	19	12466341	12501996	-	5765	Dtx4
475	ENSMUSG00000020638	367.9661697	244.4465274	491.4858119	2.010606643	1.007630859	0.031800745	0.965895241	12	26469204	26479837	+	4163	Cmpk2
476	ENSMUSG00000028359	13.47343064	26.94686129	0	0	-Inf	0.031815524	0.965895241	4	63356162	63359511	+	773	Orm3
483	ENSMUSG00000074570	12.98852569	0	25.97705137	Inf	Inf	0.03305156	0.986847929	2	172393794	172433757	+	5340	Cass4
486	ENSMUSG00000020839	233.7180052	145.3205734	322.115437	2.216585233	1.148338839	0.033194319	0.986847929	11	76902159	76916587	+	1495	Tmigd1
493	ENSMUSG00000030747	25.17547379	46.19461935	4.156328219	0.089974293	-3.474343328	0.033897664	0.993620976	7	99153658	99182719	-	3083	Dgat2
496	ENSMUSG00000022574	230.4906658	317.588008	143.3933236	0.451507362	-1.147178585	0.034389247	1	15	75890956	75894481	-	2344	Naprt
503	ENSMUSG00000042251	113.3415861	167.4554952	59.22767713	0.353692049	-1.499434309	0.035525917	1	1	131797381	131821473	+	7028	Pm20d1
507	ENSMUSG00000034918	41.06477021	12.51104274	69.61849767	5.564563971	2.476268645	0.035981002	1	13	54701461	54736662	+	4129	Cdhr2
508	ENSMUSG00000029651	91.23387842	44.26984355	138.1979133	3.121716777	1.642339652	0.036112566	1	5	147957320	148316065	+	12874	Mtus2
509	ENSMUSG00000025324	12.99223669	25.98447339	0	0	-Inf	0.036288161	1	7	58656166	58829420	+	5587	Atp10a
510	ENSMUSG00000061186	12.99223669	25.98447339	0	0	-Inf	0.036288161	1	2	10370510	10595253	+	9128	Sfmbt2
514	ENSMUSG00000010660	71.40472921	111.6369968	31.17246165	0.279230565	-1.840471227	0.036997412	1	9	119071527	119093502	-	3093	Plcd1
518	ENSMUSG00000028076	94.59605107	142.4334097	46.75869247	0.328284583	-1.606981097	0.037464996	1	3	86995834	86999441	-	2570	Cd1d1
521	ENSMUSG00000054459	39.02495317	11.54865484	66.50125151	5.758354756	2.525656672	0.037607852	1	12	11325242	11436613	-	1956	Vsnl1
523	ENSMUSG00000044707	118.5221524	63.51760161	173.5267032	2.731946717	1.449929346	0.03776604	1	11	43528784	43586997	+	2781	Ccnjl
524	ENSMUSG00000038677	53.74651929	20.21014597	87.28289261	4.318766067	2.110619173	0.037828776	1	17	28142141	28174854	+	8844	Scube3
525	ENSMUSG00000026437	161.4560333	94.31401451	228.5980521	2.423797282	1.277269042	0.038068591	1	1	132112237	132139684	-	4764	Cdk18
526	ENSMUSG00000078137	138.7285873	77.95342016	199.5037545	2.55926878	1.355731671	0.038122051	1	2	118699103	118703963	-	4861	Ankrd63
529	ENSMUSG00000038523	34.9910882	60.6304379	9.351738494	0.154241645	-2.696735749	0.038516033	1	2	154547085	154550003	+	976	1700003F12Rik
531	ENSMUSG00000042106	105.9702886	156.8692282	55.07134891	0.35106534	-1.510188527	0.039558418	1	9	107984223	107985879	-	1156	Inka1
537	ENSMUSG00000053852	63.8689103	26.94686129	100.7909593	3.740359897	1.903177093	0.040421689	1	X	56870163	57001558	+	9817	Adgrg4
544	ENSMUSG00000038521	279.1048619	375.3312822	182.8784417	0.487245402	-1.037279522	0.04156599	1	6	124530345	124542359	-	3129	C1s1
548	ENSMUSG00000027442	104.8396683	54.85611048	154.8232262	2.822351509	1.496897679	0.041761906	1	2	148798785	148805595	+	853	Cst8
552	ENSMUSG00000052688	69.96114735	108.7498331	31.17246165	0.286643765	-1.802669194	0.042676685	1	1	131688695	131715439	+	4624	Rab7b
555	ENSMUSG00000032202	115.4432533	62.55521371	168.3312929	2.690923472	1.428101363	0.042819764	1	9	73044854	73097629	+	3879	Rab27a
562	ENSMUSG00000047117	234.0458108	150.1325129	317.9591088	2.117856437	1.082604797	0.044277043	1	13	96416134	96471198	-	3662	Ankdd1b
564	ENSMUSG00000032656	219.9204799	139.546246	300.2947139	2.151936885	1.105635765	0.04429941	1	18	56761716	56925548	-	6006	March3
573	ENSMUSG00000028415	199.7140449	125.1104274	274.3176625	2.192604311	1.132645479	0.04632586	1	4	40920052	40931395	+	477	Spink4
574	ENSMUSG00000074595	213.8393759	135.6966943	291.9820574	2.151725647	1.105494141	0.0463692	1	2	164579519	164585447	-	867	Wfdc6a
577	ENSMUSG00000005686	146.2149261	85.65252338	206.7773289	2.414141706	1.271510362	0.046712518	1	7	110768206	110812405	+	5627	Ampd3
578	ENSMUSG00000015143	205.9324562	281.9796556	129.8852569	0.460619248	-1.118353397	0.046975946	1	12	80167547	80260371	-	5533	Actn1
579	ENSMUSG00000032812	232.1643301	314.7008443	149.6278159	0.475460484	-1.072602651	0.047051769	1	7	101348067	101412586	+	8433	Arap1
580	ENSMUSG00000035697	273.3429046	180.9289258	365.7568833	2.021550074	1.01546194	0.047153579	1	10	80016653	80031472	+	4478	Arhgap45
582	ENSMUSG00000035914	30.34614401	7.699103225	52.9931848	6.883033419	2.783044515	0.047546209	1	9	58524298	58555437	-	3658	Cd276
585	ENSMUSG00000106627	60.79001122	25.98447339	95.59554905	3.678948872	1.879293627	0.047790473	1	5	25965961	25972663	-	2975	Gm21680
587	ENSMUSG00000061882	143.1743741	83.72774758	202.6210007	2.419998227	1.275005991	0.047917705	1	5	123930679	123969895	+	8505	Ccdc62
589	ENSMUSG00000049521	15.02834272	0.962387903	29.09429754	30.23136247	4.917974095	0.048765839	1	15	78842624	78850897	+	2560	Cdc42ep1
