# Supplementary material for: Deletion of Meg8-DMR Enhances Migration and Invasion of MLTC-1 Depending on the CTCF Binding Sites
Source: Int J Mol Sci. 2022 Aug 8;23(15):8828. doi: 10.3390/ijms23158828 (PMC9369160; doi:10.3390/ijms23158828)
Supplement: Supplementary file 1 [file ijms-23-08828-s001.zip › Table S5 NEW_result_newtarget_MLTC-1_vs_Meg8DMR-KO.txt.csv.csv]

	miRNA	miRNA_Chr	Star	End	Stand	target_gene_id	target_gene_name	target_gene_chr	In_domain
1263	mmu-miR-99b-5p	chr17	17830194	17830215	+	ENSMUSG00000039323	Igfbp2	chr1	F
12631	mmu-miR-99b-5p	chr17	17830194	17830215	+	ENSMUSG00000021266	Wars	chr12	F
12632	mmu-miR-99b-5p	chr17	17830194	17830215	+	ENSMUSG00000021258	Ccnk	chr12	F
12633	mmu-miR-99b-5p	chr17	17830194	17830215	+	ENSMUSG00000043391	2510009E07Rik	chr16	F
12634	mmu-miR-99b-5p	chr17	17830194	17830215	+	ENSMUSG00000045053	Kcng3	chr17	F
12635	mmu-miR-99b-5p	chr17	17830194	17830215	+	ENSMUSG00000028034	Fubp1	chr3	F
12636	mmu-miR-99b-5p	chr17	17830194	17830215	+	ENSMUSG00000041313	Slc7a1	chr5	F
12637	mmu-miR-99b-5p	chr17	17830194	17830215	+	ENSMUSG00000058013	Sept11	chr5	F
12638	mmu-miR-99b-5p	chr17	17830194	17830215	+	ENSMUSG00000005667	Mthfd2	chr6	F
12639	mmu-miR-99b-5p	chr17	17830194	17830215	+	ENSMUSG00000031026	Trim66	chr7	F
1241	mmu-miR-99a-5p	chr16	77598940	77598961	+	ENSMUSG00000039323	Igfbp2	chr1	F
12411	mmu-miR-99a-5p	chr16	77598940	77598961	+	ENSMUSG00000021266	Wars	chr12	F
12412	mmu-miR-99a-5p	chr16	77598940	77598961	+	ENSMUSG00000021258	Ccnk	chr12	F
12413	mmu-miR-99a-5p	chr16	77598940	77598961	+	ENSMUSG00000043391	2510009E07Rik	chr16	F
12414	mmu-miR-99a-5p	chr16	77598940	77598961	+	ENSMUSG00000045053	Kcng3	chr17	F
12415	mmu-miR-99a-5p	chr16	77598940	77598961	+	ENSMUSG00000028034	Fubp1	chr3	F
12416	mmu-miR-99a-5p	chr16	77598940	77598961	+	ENSMUSG00000041313	Slc7a1	chr5	F
12417	mmu-miR-99a-5p	chr16	77598940	77598961	+	ENSMUSG00000058013	Sept11	chr5	F
12418	mmu-miR-99a-5p	chr16	77598940	77598961	+	ENSMUSG00000005667	Mthfd2	chr6	F
12419	mmu-miR-99a-5p	chr16	77598940	77598961	+	ENSMUSG00000031026	Trim66	chr7	F
3334	mmu-miR-98-5p	chrX	151913229	151913250	+	ENSMUSG00000026674	Ddr2	chr1	F
33341	mmu-miR-98-5p	chrX	151913229	151913250	+	ENSMUSG00000026131	Dst	chr1	F
33342	mmu-miR-98-5p	chrX	151913229	151913250	+	ENSMUSG00000026207	Speg	chr1	F
33343	mmu-miR-98-5p	chrX	151913229	151913250	+	ENSMUSG00000019838	Slc16a10	chr10	F
33344	mmu-miR-98-5p	chrX	151913229	151913250	+	ENSMUSG00000034591	Slc41a2	chr10	F
33345	mmu-miR-98-5p	chrX	151913229	151913250	+	ENSMUSG00000025357	Dgka	chr10	F
33346	mmu-miR-98-5p	chrX	151913229	151913250	+	ENSMUSG00000036875	Dna2	chr10	F
33347	mmu-miR-98-5p	chrX	151913229	151913250	+	ENSMUSG00000052613	Pcdh15	chr10	F
33348	mmu-miR-98-5p	chrX	151913229	151913250	+	ENSMUSG00000020451	Limk2	chr11	F
33349	mmu-miR-98-5p	chrX	151913229	151913250	+	ENSMUSG00000061666	Gdpd1	chr11	F
333410	mmu-miR-98-5p	chrX	151913229	151913250	+	ENSMUSG00000034285	Nipsnap1	chr11	F
333411	mmu-miR-98-5p	chrX	151913229	151913250	+	ENSMUSG00000034209	Rasl10a	chr11	F
333412	mmu-miR-98-5p	chrX	151913229	151913250	+	ENSMUSG00000021127	Zfp36l1	chr12	F
333413	mmu-miR-98-5p	chrX	151913229	151913250	+	ENSMUSG00000042507	Elmsan1	chr12	F
333414	mmu-miR-98-5p	chrX	151913229	151913250	+	ENSMUSG00000079036	Alkbh1	chr12	F
333415	mmu-miR-98-5p	chrX	151913229	151913250	+	ENSMUSG00000020962	Gtf2a1	chr12	F
333416	mmu-miR-98-5p	chrX	151913229	151913250	+	ENSMUSG00000021189	Atxn3	chr12	F
333417	mmu-miR-98-5p	chrX	151913229	151913250	+	ENSMUSG00000021266	Wars	chr12	F
333418	mmu-miR-98-5p	chrX	151913229	151913250	+	ENSMUSG00000020649	Rrm2	chr12	F
333419	mmu-miR-98-5p	chrX	151913229	151913250	+	ENSMUSG00000033373	Fntb	chr12	F
333420	mmu-miR-98-5p	chrX	151913229	151913250	+	ENSMUSG00000001175	Calm1	chr12	F
333421	mmu-miR-98-5p	chrX	151913229	151913250	+	ENSMUSG00000021275	Tecpr2	chr12	F
333422	mmu-miR-98-5p	chrX	151913229	151913250	+	ENSMUSG00000037697	Ddhd1	chr14	F
333423	mmu-miR-98-5p	chrX	151913229	151913250	+	ENSMUSG00000021895	Arhgef3	chr14	F
333424	mmu-miR-98-5p	chrX	151913229	151913250	+	ENSMUSG00000040618	Pck2	chr14	F
333425	mmu-miR-98-5p	chrX	151913229	151913250	+	ENSMUSG00000022358	Fbxo32	chr15	F
333426	mmu-miR-98-5p	chrX	151913229	151913250	+	ENSMUSG00000044250	Pced1b	chr15	F
333427	mmu-miR-98-5p	chrX	151913229	151913250	+	ENSMUSG00000022514	Il1rap	chr16	F
333428	mmu-miR-98-5p	chrX	151913229	151913250	+	ENSMUSG00000033597	Caskin1	chr17	F
333429	mmu-miR-98-5p	chrX	151913229	151913250	+	ENSMUSG00000042099	Kank3	chr17	F
333430	mmu-miR-98-5p	chrX	151913229	151913250	+	ENSMUSG00000023952	Gtpbp2	chr17	F
333431	mmu-miR-98-5p	chrX	151913229	151913250	+	ENSMUSG00000024085	Man2a1	chr17	F
333432	mmu-miR-98-5p	chrX	151913229	151913250	+	ENSMUSG00000024427	Spry4	chr18	F
333433	mmu-miR-98-5p	chrX	151913229	151913250	+	ENSMUSG00000039982	Dtx4	chr19	F
333434	mmu-miR-98-5p	chrX	151913229	151913250	+	ENSMUSG00000024817	Uhrf2	chr19	F
333435	mmu-miR-98-5p	chrX	151913229	151913250	+	ENSMUSG00000015090	Ptgds	chr2	F
333436	mmu-miR-98-5p	chrX	151913229	151913250	+	ENSMUSG00000035778	Ggta1	chr2	F
333437	mmu-miR-98-5p	chrX	151913229	151913250	+	ENSMUSG00000017412	Cacnb4	chr2	F
333438	mmu-miR-98-5p	chrX	151913229	151913250	+	ENSMUSG00000004105	Angptl2	chr2	F
333439	mmu-miR-98-5p	chrX	151913229	151913250	+	ENSMUSG00000027313	Chac1	chr2	F
333440	mmu-miR-98-5p	chrX	151913229	151913250	+	ENSMUSG00000042851	Zc3h6	chr2	F
333441	mmu-miR-98-5p	chrX	151913229	151913250	+	ENSMUSG00000027737	Slc7a11	chr3	F
333442	mmu-miR-98-5p	chrX	151913229	151913250	+	ENSMUSG00000027947	Il6ra	chr3	F
333443	mmu-miR-98-5p	chrX	151913229	151913250	+	ENSMUSG00000028518	Prkaa2	chr4	F
333444	mmu-miR-98-5p	chrX	151913229	151913250	+	ENSMUSG00000028211	Trp53inp1	chr4	F
333445	mmu-miR-98-5p	chrX	151913229	151913250	+	ENSMUSG00000028572	Hook1	chr4	F
333446	mmu-miR-98-5p	chrX	151913229	151913250	+	ENSMUSG00000028654	Mycl	chr4	F
333447	mmu-miR-98-5p	chrX	151913229	151913250	+	ENSMUSG00000037936	Scarb1	chr5	F
333448	mmu-miR-98-5p	chrX	151913229	151913250	+	ENSMUSG00000041313	Slc7a1	chr5	F
333449	mmu-miR-98-5p	chrX	151913229	151913250	+	ENSMUSG00000039782	Cpeb2	chr5	F
333450	mmu-miR-98-5p	chrX	151913229	151913250	+	ENSMUSG00000034981	Parm1	chr5	F
333451	mmu-miR-98-5p	chrX	151913229	151913250	+	ENSMUSG00000058013	Sept11	chr5	F
333452	mmu-miR-98-5p	chrX	151913229	151913250	+	ENSMUSG00000030022	Adamts9	chr6	F
333453	mmu-miR-98-5p	chrX	151913229	151913250	+	ENSMUSG00000030761	Myo7a	chr7	F
333454	mmu-miR-98-5p	chrX	151913229	151913250	+	ENSMUSG00000031026	Trim66	chr7	F
333455	mmu-miR-98-5p	chrX	151913229	151913250	+	ENSMUSG00000030987	Stim1	chr7	F
333456	mmu-miR-98-5p	chrX	151913229	151913250	+	ENSMUSG00000046152	Fut10	chr8	F
333457	mmu-miR-98-5p	chrX	151913229	151913250	+	ENSMUSG00000032232	Cgnl1	chr9	F
333458	mmu-miR-98-5p	chrX	151913229	151913250	+	ENSMUSG00000032549	Rab6b	chr9	F
333459	mmu-miR-98-5p	chrX	151913229	151913250	+	ENSMUSG00000031337	Mtm1	chrX	F
333460	mmu-miR-98-5p	chrX	151913229	151913250	+	ENSMUSG00000019558	Slc6a8	chrX	F
333461	mmu-miR-98-5p	chrX	151913229	151913250	+	ENSMUSG00000031327	Chic1	chrX	F
2432	mmu-miR-96-5p	chr6	30169506	30169528	-	ENSMUSG00000026674	Ddr2	chr1	F
24321	mmu-miR-96-5p	chr6	30169506	30169528	-	ENSMUSG00000025931	Paqr8	chr1	F
24322	mmu-miR-96-5p	chr6	30169506	30169528	-	ENSMUSG00000026207	Speg	chr1	F
24323	mmu-miR-96-5p	chr6	30169506	30169528	-	ENSMUSG00000019852	Arfgef3	chr10	F
24324	mmu-miR-96-5p	chr6	30169506	30169528	-	ENSMUSG00000039485	Tspyl4	chr10	F
24325	mmu-miR-96-5p	chr6	30169506	30169528	-	ENSMUSG00000003585	Sec14l2	chr11	F
24326	mmu-miR-96-5p	chr6	30169506	30169528	-	ENSMUSG00000020142	Slc1a4	chr11	F
24327	mmu-miR-96-5p	chr6	30169506	30169528	-	ENSMUSG00000020680	Taf15	chr11	F
24328	mmu-miR-96-5p	chr6	30169506	30169528	-	ENSMUSG00000021067	Sav1	chr12	F
24329	mmu-miR-96-5p	chr6	30169506	30169528	-	ENSMUSG00000056459	Zbtb25	chr12	F
243210	mmu-miR-96-5p	chr6	30169506	30169528	-	ENSMUSG00000021127	Zfp36l1	chr12	F
243211	mmu-miR-96-5p	chr6	30169506	30169528	-	ENSMUSG00000021236	Entpd5	chr12	F
243212	mmu-miR-96-5p	chr6	30169506	30169528	-	ENSMUSG00000021189	Atxn3	chr12	F
243213	mmu-miR-96-5p	chr6	30169506	30169528	-	ENSMUSG00000021276	Cinp	chr12	F
243214	mmu-miR-96-5p	chr6	30169506	30169528	-	ENSMUSG00000035954	Dock4	chr12	F
243215	mmu-miR-96-5p	chr6	30169506	30169528	-	ENSMUSG00000021109	Hif1a	chr12	F
243216	mmu-miR-96-5p	chr6	30169506	30169528	-	ENSMUSG00000037896	Rcor1	chr12	F
243217	mmu-miR-96-5p	chr6	30169506	30169528	-	ENSMUSG00000021281	Tnfaip2	chr12	F
243218	mmu-miR-96-5p	chr6	30169506	30169528	-	ENSMUSG00000072825	Cep170b	chr12	F
243219	mmu-miR-96-5p	chr6	30169506	30169528	-	ENSMUSG00000037697	Ddhd1	chr14	F
243220	mmu-miR-96-5p	chr6	30169506	30169528	-	ENSMUSG00000022114	Spry2	chr14	F
243221	mmu-miR-96-5p	chr6	30169506	30169528	-	ENSMUSG00000021895	Arhgef3	chr14	F
243222	mmu-miR-96-5p	chr6	30169506	30169528	-	ENSMUSG00000002489	Tiam1	chr16	F
243223	mmu-miR-96-5p	chr6	30169506	30169528	-	ENSMUSG00000023883	Phf10	chr17	F
243224	mmu-miR-96-5p	chr6	30169506	30169528	-	ENSMUSG00000024066	Xdh	chr17	F
243225	mmu-miR-96-5p	chr6	30169506	30169528	-	ENSMUSG00000024085	Man2a1	chr17	F
243226	mmu-miR-96-5p	chr6	30169506	30169528	-	ENSMUSG00000040852	Plekhh2	chr17	F
243227	mmu-miR-96-5p	chr6	30169506	30169528	-	ENSMUSG00000024143	Rhoq	chr17	F
243228	mmu-miR-96-5p	chr6	30169506	30169528	-	ENSMUSG00000024427	Spry4	chr18	F
243229	mmu-miR-96-5p	chr6	30169506	30169528	-	ENSMUSG00000046324	Ermp1	chr19	F
243230	mmu-miR-96-5p	chr6	30169506	30169528	-	ENSMUSG00000035778	Ggta1	chr2	F
243231	mmu-miR-96-5p	chr6	30169506	30169528	-	ENSMUSG00000017412	Cacnb4	chr2	F
243232	mmu-miR-96-5p	chr6	30169506	30169528	-	ENSMUSG00000032715	Trib3	chr2	F
243233	mmu-miR-96-5p	chr6	30169506	30169528	-	ENSMUSG00000026858	Miga2	chr2	F
243234	mmu-miR-96-5p	chr6	30169506	30169528	-	ENSMUSG00000004105	Angptl2	chr2	F
243235	mmu-miR-96-5p	chr6	30169506	30169528	-	ENSMUSG00000027313	Chac1	chr2	F
243236	mmu-miR-96-5p	chr6	30169506	30169528	-	ENSMUSG00000042851	Zc3h6	chr2	F
243237	mmu-miR-96-5p	chr6	30169506	30169528	-	ENSMUSG00000019528	Gyg	chr3	F
243238	mmu-miR-96-5p	chr6	30169506	30169528	-	ENSMUSG00000033883	D3Ertd254e	chr3	F
243239	mmu-miR-96-5p	chr6	30169506	30169528	-	ENSMUSG00000049100	Pcdh10	chr3	F
243240	mmu-miR-96-5p	chr6	30169506	30169528	-	ENSMUSG00000028049	Scamp3	chr3	F
243241	mmu-miR-96-5p	chr6	30169506	30169528	-	ENSMUSG00000053931	Cnn3	chr3	F
243242	mmu-miR-96-5p	chr6	30169506	30169528	-	ENSMUSG00000028034	Fubp1	chr3	F
243243	mmu-miR-96-5p	chr6	30169506	30169528	-	ENSMUSG00000028893	Sesn2	chr4	F
243244	mmu-miR-96-5p	chr6	30169506	30169528	-	ENSMUSG00000028211	Trp53inp1	chr4	F
243245	mmu-miR-96-5p	chr6	30169506	30169528	-	ENSMUSG00000028542	Slc6a9	chr4	F
243246	mmu-miR-96-5p	chr6	30169506	30169528	-	ENSMUSG00000037979	Ccdc92	chr5	F
243247	mmu-miR-96-5p	chr6	30169506	30169528	-	ENSMUSG00000037936	Scarb1	chr5	F
243248	mmu-miR-96-5p	chr6	30169506	30169528	-	ENSMUSG00000039782	Cpeb2	chr5	F
243249	mmu-miR-96-5p	chr6	30169506	30169528	-	ENSMUSG00000034981	Parm1	chr5	F
243250	mmu-miR-96-5p	chr6	30169506	30169528	-	ENSMUSG00000058013	Sept11	chr5	F
243251	mmu-miR-96-5p	chr6	30169506	30169528	-	ENSMUSG00000051950	B3glct	chr5	F
243252	mmu-miR-96-5p	chr6	30169506	30169528	-	ENSMUSG00000030352	Tspan9	chr6	F
243253	mmu-miR-96-5p	chr6	30169506	30169528	-	ENSMUSG00000039062	Anpep	chr7	F
243254	mmu-miR-96-5p	chr6	30169506	30169528	-	ENSMUSG00000032860	P2ry2	chr7	F
243255	mmu-miR-96-5p	chr6	30169506	30169528	-	ENSMUSG00000054555	Adam12	chr7	F
243256	mmu-miR-96-5p	chr6	30169506	30169528	-	ENSMUSG00000048078	Tenm4	chr7	F
243257	mmu-miR-96-5p	chr6	30169506	30169528	-	ENSMUSG00000031770	Herpud1	chr8	F
243258	mmu-miR-96-5p	chr6	30169506	30169528	-	ENSMUSG00000032348	Gsta4	chr9	F
243259	mmu-miR-96-5p	chr6	30169506	30169528	-	ENSMUSG00000032549	Rab6b	chr9	F
243260	mmu-miR-96-5p	chr6	30169506	30169528	-	ENSMUSG00000055653	Gpc3	chrX	F
243261	mmu-miR-96-5p	chr6	30169506	30169528	-	ENSMUSG00000033965	Slc16a2	chrX	F
243262	mmu-miR-96-5p	chr6	30169506	30169528	-	ENSMUSG00000031434	Morc4	chrX	F
243263	mmu-miR-96-5p	chr6	30169506	30169528	-	ENSMUSG00000019558	Slc6a8	chrX	F
243264	mmu-miR-96-5p	chr6	30169506	30169528	-	ENSMUSG00000031327	Chic1	chrX	F
2395	mmu-miR-93-5p	chr5	138165574	138165596	-	ENSMUSG00000026674	Ddr2	chr1	F
23951	mmu-miR-93-5p	chr5	138165574	138165596	-	ENSMUSG00000026628	Atf3	chr1	F
23952	mmu-miR-93-5p	chr5	138165574	138165596	-	ENSMUSG00000026131	Dst	chr1	F
23953	mmu-miR-93-5p	chr5	138165574	138165596	-	ENSMUSG00000063659	Zbtb18	chr1	F
23954	mmu-miR-93-5p	chr5	138165574	138165596	-	ENSMUSG00000069670	Nkain2	chr10	F
23955	mmu-miR-93-5p	chr5	138165574	138165596	-	ENSMUSG00000020262	Adarb1	chr10	F
23956	mmu-miR-93-5p	chr5	138165574	138165596	-	ENSMUSG00000034591	Slc41a2	chr10	F
23957	mmu-miR-93-5p	chr5	138165574	138165596	-	ENSMUSG00000020142	Slc1a4	chr11	F
23958	mmu-miR-93-5p	chr5	138165574	138165596	-	ENSMUSG00000041329	Atp1b2	chr11	F
23959	mmu-miR-93-5p	chr5	138165574	138165596	-	ENSMUSG00000020948	Klhl28	chr12	F
239510	mmu-miR-93-5p	chr5	138165574	138165596	-	ENSMUSG00000020982	Nemf	chr12	F
239511	mmu-miR-93-5p	chr5	138165574	138165596	-	ENSMUSG00000021054	Sgpp1	chr12	F
239512	mmu-miR-93-5p	chr5	138165574	138165596	-	ENSMUSG00000021127	Zfp36l1	chr12	F
239513	mmu-miR-93-5p	chr5	138165574	138165596	-	ENSMUSG00000054150	Syne3	chr12	F
239514	mmu-miR-93-5p	chr5	138165574	138165596	-	ENSMUSG00000041341	Atg2b	chr12	F
239515	mmu-miR-93-5p	chr5	138165574	138165596	-	ENSMUSG00000047832	Cdca4	chr12	F
239516	mmu-miR-93-5p	chr5	138165574	138165596	-	ENSMUSG00000020649	Rrm2	chr12	F
239517	mmu-miR-93-5p	chr5	138165574	138165596	-	ENSMUSG00000035954	Dock4	chr12	F
239518	mmu-miR-93-5p	chr5	138165574	138165596	-	ENSMUSG00000021109	Hif1a	chr12	F
239519	mmu-miR-93-5p	chr5	138165574	138165596	-	ENSMUSG00000001175	Calm1	chr12	F
239520	mmu-miR-93-5p	chr5	138165574	138165596	-	ENSMUSG00000021115	Vrk1	chr12	F
239521	mmu-miR-93-5p	chr5	138165574	138165596	-	ENSMUSG00000017843	Ppp2r5c	chr12	F
239522	mmu-miR-93-5p	chr5	138165574	138165596	-	ENSMUSG00000037896	Rcor1	chr12	F
239523	mmu-miR-93-5p	chr5	138165574	138165596	-	ENSMUSG00000021281	Tnfaip2	chr12	F
239524	mmu-miR-93-5p	chr5	138165574	138165596	-	ENSMUSG00000021286	Zfyve21	chr12	F
239525	mmu-miR-93-5p	chr5	138165574	138165596	-	ENSMUSG00000072825	Cep170b	chr12	F
239526	mmu-miR-93-5p	chr5	138165574	138165596	-	ENSMUSG00000045312	Lhfpl2	chr13	F
239527	mmu-miR-93-5p	chr5	138165574	138165596	-	ENSMUSG00000021831	Ero1l	chr14	F
239528	mmu-miR-93-5p	chr5	138165574	138165596	-	ENSMUSG00000022034	Esco2	chr14	F
239529	mmu-miR-93-5p	chr5	138165574	138165596	-	ENSMUSG00000021822	Plau	chr14	F
239530	mmu-miR-93-5p	chr5	138165574	138165596	-	ENSMUSG00000040618	Pck2	chr14	F
239531	mmu-miR-93-5p	chr5	138165574	138165596	-	ENSMUSG00000022416	Cacna1i	chr15	F
239532	mmu-miR-93-5p	chr5	138165574	138165596	-	ENSMUSG00000041205	Map6d1	chr16	F
239533	mmu-miR-93-5p	chr5	138165574	138165596	-	ENSMUSG00000043391	2510009E07Rik	chr16	F
239534	mmu-miR-93-5p	chr5	138165574	138165596	-	ENSMUSG00000046598	Bdh1	chr16	F
239535	mmu-miR-93-5p	chr5	138165574	138165596	-	ENSMUSG00000043336	Filip1l	chr16	F
239536	mmu-miR-93-5p	chr5	138165574	138165596	-	ENSMUSG00000023883	Phf10	chr17	F
239537	mmu-miR-93-5p	chr5	138165574	138165596	-	ENSMUSG00000024039	Cbs	chr17	F
239538	mmu-miR-93-5p	chr5	138165574	138165596	-	ENSMUSG00000033597	Caskin1	chr17	F
239539	mmu-miR-93-5p	chr5	138165574	138165596	-	ENSMUSG00000023067	Cdkn1a	chr17	F
239540	mmu-miR-93-5p	chr5	138165574	138165596	-	ENSMUSG00000024085	Man2a1	chr17	F
239541	mmu-miR-93-5p	chr5	138165574	138165596	-	ENSMUSG00000024143	Rhoq	chr17	F
239542	mmu-miR-93-5p	chr5	138165574	138165596	-	ENSMUSG00000024427	Spry4	chr18	F
239543	mmu-miR-93-5p	chr5	138165574	138165596	-	ENSMUSG00000038418	Egr1	chr18	F
239544	mmu-miR-93-5p	chr5	138165574	138165596	-	ENSMUSG00000071847	Apcdd1	chr18	F
239545	mmu-miR-93-5p	chr5	138165574	138165596	-	ENSMUSG00000053617	Sh3pxd2a	chr19	F
239546	mmu-miR-93-5p	chr5	138165574	138165596	-	ENSMUSG00000043639	Rbm20	chr19	F
239547	mmu-miR-93-5p	chr5	138165574	138165596	-	ENSMUSG00000025314	Ptprj	chr2	F
239548	mmu-miR-93-5p	chr5	138165574	138165596	-	ENSMUSG00000005087	Cd44	chr2	F
239549	mmu-miR-93-5p	chr5	138165574	138165596	-	ENSMUSG00000026833	Olfm1	chr2	F
239550	mmu-miR-93-5p	chr5	138165574	138165596	-	ENSMUSG00000026858	Miga2	chr2	F
239551	mmu-miR-93-5p	chr5	138165574	138165596	-	ENSMUSG00000042851	Zc3h6	chr2	F
239552	mmu-miR-93-5p	chr5	138165574	138165596	-	ENSMUSG00000027947	Il6ra	chr3	F
239553	mmu-miR-93-5p	chr5	138165574	138165596	-	ENSMUSG00000053192	Mllt11	chr3	F
239554	mmu-miR-93-5p	chr5	138165574	138165596	-	ENSMUSG00000032826	Ank2	chr3	F
239555	mmu-miR-93-5p	chr5	138165574	138165596	-	ENSMUSG00000033883	D3Ertd254e	chr3	F
239556	mmu-miR-93-5p	chr5	138165574	138165596	-	ENSMUSG00000049100	Pcdh10	chr3	F
239557	mmu-miR-93-5p	chr5	138165574	138165596	-	ENSMUSG00000028128	F3	chr3	F
239558	mmu-miR-93-5p	chr5	138165574	138165596	-	ENSMUSG00000028034	Fubp1	chr3	F
239559	mmu-miR-93-5p	chr5	138165574	138165596	-	ENSMUSG00000028444	Cntfr	chr4	F
239560	mmu-miR-93-5p	chr5	138165574	138165596	-	ENSMUSG00000028893	Sesn2	chr4	F
239561	mmu-miR-93-5p	chr5	138165574	138165596	-	ENSMUSG00000028211	Trp53inp1	chr4	F
239562	mmu-miR-93-5p	chr5	138165574	138165596	-	ENSMUSG00000028572	Hook1	chr4	F
239563	mmu-miR-93-5p	chr5	138165574	138165596	-	ENSMUSG00000028542	Slc6a9	chr4	F
239564	mmu-miR-93-5p	chr5	138165574	138165596	-	ENSMUSG00000028654	Mycl	chr4	F
239565	mmu-miR-93-5p	chr5	138165574	138165596	-	ENSMUSG00000073700	Klhl21	chr4	F
239566	mmu-miR-93-5p	chr5	138165574	138165596	-	ENSMUSG00000039713	Plekhg5	chr4	F
239567	mmu-miR-93-5p	chr5	138165574	138165596	-	ENSMUSG00000039987	Phtf2	chr5	F
239568	mmu-miR-93-5p	chr5	138165574	138165596	-	ENSMUSG00000039474	Wfs1	chr5	F
239569	mmu-miR-93-5p	chr5	138165574	138165596	-	ENSMUSG00000041313	Slc7a1	chr5	F
239570	mmu-miR-93-5p	chr5	138165574	138165596	-	ENSMUSG00000058013	Sept11	chr5	F
239571	mmu-miR-93-5p	chr5	138165574	138165596	-	ENSMUSG00000029304	Spp1	chr5	F
239572	mmu-miR-93-5p	chr5	138165574	138165596	-	ENSMUSG00000030352	Tspan9	chr6	F
239573	mmu-miR-93-5p	chr5	138165574	138165596	-	ENSMUSG00000030747	Dgat2	chr7	F
239574	mmu-miR-93-5p	chr5	138165574	138165596	-	ENSMUSG00000030987	Stim1	chr7	F
239575	mmu-miR-93-5p	chr5	138165574	138165596	-	ENSMUSG00000031654	Cbln1	chr8	F
239576	mmu-miR-93-5p	chr5	138165574	138165596	-	ENSMUSG00000032320	Rcn2	chr9	F
239577	mmu-miR-93-5p	chr5	138165574	138165596	-	ENSMUSG00000040204	Pclaf	chr9	F
239578	mmu-miR-93-5p	chr5	138165574	138165596	-	ENSMUSG00000031337	Mtm1	chrX	F
239579	mmu-miR-93-5p	chr5	138165574	138165596	-	ENSMUSG00000031327	Chic1	chrX	F
2053	mmu-miR-92b-3p	chr3	89227126	89227147	-	ENSMUSG00000026674	Ddr2	chr1	F
20531	mmu-miR-92b-3p	chr3	89227126	89227147	-	ENSMUSG00000063659	Zbtb18	chr1	F
20532	mmu-miR-92b-3p	chr3	89227126	89227147	-	ENSMUSG00000019838	Slc16a10	chr10	F
20533	mmu-miR-92b-3p	chr3	89227126	89227147	-	ENSMUSG00000020331	Hcn2	chr10	F
20534	mmu-miR-92b-3p	chr3	89227126	89227147	-	ENSMUSG00000019894	Slc6a15	chr10	F
20535	mmu-miR-92b-3p	chr3	89227126	89227147	-	ENSMUSG00000020886	Dlg4	chr11	F
20536	mmu-miR-92b-3p	chr3	89227126	89227147	-	ENSMUSG00000020680	Taf15	chr11	F
20537	mmu-miR-92b-3p	chr3	89227126	89227147	-	ENSMUSG00000002997	Prkar2b	chr12	F
20538	mmu-miR-92b-3p	chr3	89227126	89227147	-	ENSMUSG00000034761	Map4k5	chr12	F
20539	mmu-miR-92b-3p	chr3	89227126	89227147	-	ENSMUSG00000021054	Sgpp1	chr12	F
205310	mmu-miR-92b-3p	chr3	89227126	89227147	-	ENSMUSG00000020962	Gtf2a1	chr12	F
205311	mmu-miR-92b-3p	chr3	89227126	89227147	-	ENSMUSG00000020964	Sel1l	chr12	F
205312	mmu-miR-92b-3p	chr3	89227126	89227147	-	ENSMUSG00000021189	Atxn3	chr12	F
205313	mmu-miR-92b-3p	chr3	89227126	89227147	-	ENSMUSG00000056770	Setd3	chr12	F
205314	mmu-miR-92b-3p	chr3	89227126	89227147	-	ENSMUSG00000001729	Akt1	chr12	F
205315	mmu-miR-92b-3p	chr3	89227126	89227147	-	ENSMUSG00000035614	Togaram1	chr12	F
205316	mmu-miR-92b-3p	chr3	89227126	89227147	-	ENSMUSG00000021109	Hif1a	chr12	F
205317	mmu-miR-92b-3p	chr3	89227126	89227147	-	ENSMUSG00000037896	Rcor1	chr12	F
205318	mmu-miR-92b-3p	chr3	89227126	89227147	-	ENSMUSG00000021286	Zfyve21	chr12	F
205319	mmu-miR-92b-3p	chr3	89227126	89227147	-	ENSMUSG00000037466	Tedc1	chr12	F
205320	mmu-miR-92b-3p	chr3	89227126	89227147	-	ENSMUSG00000045312	Lhfpl2	chr13	F
205321	mmu-miR-92b-3p	chr3	89227126	89227147	-	ENSMUSG00000021831	Ero1l	chr14	F
205322	mmu-miR-92b-3p	chr3	89227126	89227147	-	ENSMUSG00000037697	Ddhd1	chr14	F
205323	mmu-miR-92b-3p	chr3	89227126	89227147	-	ENSMUSG00000022358	Fbxo32	chr15	F
205324	mmu-miR-92b-3p	chr3	89227126	89227147	-	ENSMUSG00000022816	Fstl1	chr16	F
205325	mmu-miR-92b-3p	chr3	89227126	89227147	-	ENSMUSG00000047407	Tgif1	chr17	F
205326	mmu-miR-92b-3p	chr3	89227126	89227147	-	ENSMUSG00000024085	Man2a1	chr17	F
205327	mmu-miR-92b-3p	chr3	89227126	89227147	-	ENSMUSG00000024247	Pkdcc	chr17	F
205328	mmu-miR-92b-3p	chr3	89227126	89227147	-	ENSMUSG00000024640	Psat1	chr19	F
205329	mmu-miR-92b-3p	chr3	89227126	89227147	-	ENSMUSG00000053617	Sh3pxd2a	chr19	F
205330	mmu-miR-92b-3p	chr3	89227126	89227147	-	ENSMUSG00000005087	Cd44	chr2	F
205331	mmu-miR-92b-3p	chr3	89227126	89227147	-	ENSMUSG00000026833	Olfm1	chr2	F
205332	mmu-miR-92b-3p	chr3	89227126	89227147	-	ENSMUSG00000004105	Angptl2	chr2	F
205333	mmu-miR-92b-3p	chr3	89227126	89227147	-	ENSMUSG00000056501	Cebpb	chr2	F
205334	mmu-miR-92b-3p	chr3	89227126	89227147	-	ENSMUSG00000027737	Slc7a11	chr3	F
205335	mmu-miR-92b-3p	chr3	89227126	89227147	-	ENSMUSG00000028078	Dclk2	chr3	F
205336	mmu-miR-92b-3p	chr3	89227126	89227147	-	ENSMUSG00000032826	Ank2	chr3	F
205337	mmu-miR-92b-3p	chr3	89227126	89227147	-	ENSMUSG00000033883	D3Ertd254e	chr3	F
205338	mmu-miR-92b-3p	chr3	89227126	89227147	-	ENSMUSG00000049100	Pcdh10	chr3	F
205339	mmu-miR-92b-3p	chr3	89227126	89227147	-	ENSMUSG00000028034	Fubp1	chr3	F
205340	mmu-miR-92b-3p	chr3	89227126	89227147	-	ENSMUSG00000028572	Hook1	chr4	F
205341	mmu-miR-92b-3p	chr3	89227126	89227147	-	ENSMUSG00000028654	Mycl	chr4	F
205342	mmu-miR-92b-3p	chr3	89227126	89227147	-	ENSMUSG00000039713	Plekhg5	chr4	F
205343	mmu-miR-92b-3p	chr3	89227126	89227147	-	ENSMUSG00000039987	Phtf2	chr5	F
205344	mmu-miR-92b-3p	chr3	89227126	89227147	-	ENSMUSG00000041313	Slc7a1	chr5	F
205345	mmu-miR-92b-3p	chr3	89227126	89227147	-	ENSMUSG00000039782	Cpeb2	chr5	F
205346	mmu-miR-92b-3p	chr3	89227126	89227147	-	ENSMUSG00000061578	Ksr2	chr5	F
205347	mmu-miR-92b-3p	chr3	89227126	89227147	-	ENSMUSG00000029669	Tspan12	chr6	F
205348	mmu-miR-92b-3p	chr3	89227126	89227147	-	ENSMUSG00000030352	Tspan9	chr6	F
205349	mmu-miR-92b-3p	chr3	89227126	89227147	-	ENSMUSG00000030747	Dgat2	chr7	F
205350	mmu-miR-92b-3p	chr3	89227126	89227147	-	ENSMUSG00000001918	Slc1a5	chr7	F
205351	mmu-miR-92b-3p	chr3	89227126	89227147	-	ENSMUSG00000030847	Bag3	chr7	F
205352	mmu-miR-92b-3p	chr3	89227126	89227147	-	ENSMUSG00000031901	Dus2	chr8	F
205353	mmu-miR-92b-3p	chr3	89227126	89227147	-	ENSMUSG00000031337	Mtm1	chrX	F
205354	mmu-miR-92b-3p	chr3	89227126	89227147	-	ENSMUSG00000031327	Chic1	chrX	F
1021	mmu-miR-92a-3p	chr14	115044476	115044496	+	ENSMUSG00000026674	Ddr2	chr1	F
3116	mmu-miR-92a-3p	chrX	52741854	52741874	-	ENSMUSG00000026674	Ddr2	chr1	F
10211	mmu-miR-92a-3p	chr14	115044476	115044496	+	ENSMUSG00000063659	Zbtb18	chr1	F
31161	mmu-miR-92a-3p	chrX	52741854	52741874	-	ENSMUSG00000063659	Zbtb18	chr1	F
10212	mmu-miR-92a-3p	chr14	115044476	115044496	+	ENSMUSG00000019838	Slc16a10	chr10	F
31162	mmu-miR-92a-3p	chrX	52741854	52741874	-	ENSMUSG00000019838	Slc16a10	chr10	F
10213	mmu-miR-92a-3p	chr14	115044476	115044496	+	ENSMUSG00000020331	Hcn2	chr10	F
31163	mmu-miR-92a-3p	chrX	52741854	52741874	-	ENSMUSG00000020331	Hcn2	chr10	F
10214	mmu-miR-92a-3p	chr14	115044476	115044496	+	ENSMUSG00000019894	Slc6a15	chr10	F
31164	mmu-miR-92a-3p	chrX	52741854	52741874	-	ENSMUSG00000019894	Slc6a15	chr10	F
10215	mmu-miR-92a-3p	chr14	115044476	115044496	+	ENSMUSG00000020886	Dlg4	chr11	F
31165	mmu-miR-92a-3p	chrX	52741854	52741874	-	ENSMUSG00000020886	Dlg4	chr11	F
10216	mmu-miR-92a-3p	chr14	115044476	115044496	+	ENSMUSG00000020680	Taf15	chr11	F
31166	mmu-miR-92a-3p	chrX	52741854	52741874	-	ENSMUSG00000020680	Taf15	chr11	F
10217	mmu-miR-92a-3p	chr14	115044476	115044496	+	ENSMUSG00000002997	Prkar2b	chr12	F
31167	mmu-miR-92a-3p	chrX	52741854	52741874	-	ENSMUSG00000002997	Prkar2b	chr12	F
10218	mmu-miR-92a-3p	chr14	115044476	115044496	+	ENSMUSG00000034761	Map4k5	chr12	F
31168	mmu-miR-92a-3p	chrX	52741854	52741874	-	ENSMUSG00000034761	Map4k5	chr12	F
10219	mmu-miR-92a-3p	chr14	115044476	115044496	+	ENSMUSG00000021054	Sgpp1	chr12	F
31169	mmu-miR-92a-3p	chrX	52741854	52741874	-	ENSMUSG00000021054	Sgpp1	chr12	F
102110	mmu-miR-92a-3p	chr14	115044476	115044496	+	ENSMUSG00000020962	Gtf2a1	chr12	F
311610	mmu-miR-92a-3p	chrX	52741854	52741874	-	ENSMUSG00000020962	Gtf2a1	chr12	F
102111	mmu-miR-92a-3p	chr14	115044476	115044496	+	ENSMUSG00000020964	Sel1l	chr12	F
311611	mmu-miR-92a-3p	chrX	52741854	52741874	-	ENSMUSG00000020964	Sel1l	chr12	F
102112	mmu-miR-92a-3p	chr14	115044476	115044496	+	ENSMUSG00000021189	Atxn3	chr12	F
311612	mmu-miR-92a-3p	chrX	52741854	52741874	-	ENSMUSG00000021189	Atxn3	chr12	F
102113	mmu-miR-92a-3p	chr14	115044476	115044496	+	ENSMUSG00000056770	Setd3	chr12	F
311613	mmu-miR-92a-3p	chrX	52741854	52741874	-	ENSMUSG00000056770	Setd3	chr12	F
102114	mmu-miR-92a-3p	chr14	115044476	115044496	+	ENSMUSG00000001729	Akt1	chr12	F
311614	mmu-miR-92a-3p	chrX	52741854	52741874	-	ENSMUSG00000001729	Akt1	chr12	F
102115	mmu-miR-92a-3p	chr14	115044476	115044496	+	ENSMUSG00000035614	Togaram1	chr12	F
311615	mmu-miR-92a-3p	chrX	52741854	52741874	-	ENSMUSG00000035614	Togaram1	chr12	F
102116	mmu-miR-92a-3p	chr14	115044476	115044496	+	ENSMUSG00000021109	Hif1a	chr12	F
311616	mmu-miR-92a-3p	chrX	52741854	52741874	-	ENSMUSG00000021109	Hif1a	chr12	F
102117	mmu-miR-92a-3p	chr14	115044476	115044496	+	ENSMUSG00000037896	Rcor1	chr12	F
311617	mmu-miR-92a-3p	chrX	52741854	52741874	-	ENSMUSG00000037896	Rcor1	chr12	F
102118	mmu-miR-92a-3p	chr14	115044476	115044496	+	ENSMUSG00000021286	Zfyve21	chr12	F
311618	mmu-miR-92a-3p	chrX	52741854	52741874	-	ENSMUSG00000021286	Zfyve21	chr12	F
102119	mmu-miR-92a-3p	chr14	115044476	115044496	+	ENSMUSG00000037466	Tedc1	chr12	F
311619	mmu-miR-92a-3p	chrX	52741854	52741874	-	ENSMUSG00000037466	Tedc1	chr12	F
102120	mmu-miR-92a-3p	chr14	115044476	115044496	+	ENSMUSG00000045312	Lhfpl2	chr13	F
311620	mmu-miR-92a-3p	chrX	52741854	52741874	-	ENSMUSG00000045312	Lhfpl2	chr13	F
102121	mmu-miR-92a-3p	chr14	115044476	115044496	+	ENSMUSG00000021831	Ero1l	chr14	F
311621	mmu-miR-92a-3p	chrX	52741854	52741874	-	ENSMUSG00000021831	Ero1l	chr14	F
102122	mmu-miR-92a-3p	chr14	115044476	115044496	+	ENSMUSG00000037697	Ddhd1	chr14	F
311622	mmu-miR-92a-3p	chrX	52741854	52741874	-	ENSMUSG00000037697	Ddhd1	chr14	F
102123	mmu-miR-92a-3p	chr14	115044476	115044496	+	ENSMUSG00000022358	Fbxo32	chr15	F
311623	mmu-miR-92a-3p	chrX	52741854	52741874	-	ENSMUSG00000022358	Fbxo32	chr15	F
102124	mmu-miR-92a-3p	chr14	115044476	115044496	+	ENSMUSG00000022816	Fstl1	chr16	F
311624	mmu-miR-92a-3p	chrX	52741854	52741874	-	ENSMUSG00000022816	Fstl1	chr16	F
102125	mmu-miR-92a-3p	chr14	115044476	115044496	+	ENSMUSG00000047407	Tgif1	chr17	F
311625	mmu-miR-92a-3p	chrX	52741854	52741874	-	ENSMUSG00000047407	Tgif1	chr17	F
102126	mmu-miR-92a-3p	chr14	115044476	115044496	+	ENSMUSG00000024085	Man2a1	chr17	F
311626	mmu-miR-92a-3p	chrX	52741854	52741874	-	ENSMUSG00000024085	Man2a1	chr17	F
102127	mmu-miR-92a-3p	chr14	115044476	115044496	+	ENSMUSG00000024247	Pkdcc	chr17	F
311627	mmu-miR-92a-3p	chrX	52741854	52741874	-	ENSMUSG00000024247	Pkdcc	chr17	F
102128	mmu-miR-92a-3p	chr14	115044476	115044496	+	ENSMUSG00000024640	Psat1	chr19	F
311628	mmu-miR-92a-3p	chrX	52741854	52741874	-	ENSMUSG00000024640	Psat1	chr19	F
102129	mmu-miR-92a-3p	chr14	115044476	115044496	+	ENSMUSG00000053617	Sh3pxd2a	chr19	F
311629	mmu-miR-92a-3p	chrX	52741854	52741874	-	ENSMUSG00000053617	Sh3pxd2a	chr19	F
102130	mmu-miR-92a-3p	chr14	115044476	115044496	+	ENSMUSG00000005087	Cd44	chr2	F
311630	mmu-miR-92a-3p	chrX	52741854	52741874	-	ENSMUSG00000005087	Cd44	chr2	F
102131	mmu-miR-92a-3p	chr14	115044476	115044496	+	ENSMUSG00000026833	Olfm1	chr2	F
311631	mmu-miR-92a-3p	chrX	52741854	52741874	-	ENSMUSG00000026833	Olfm1	chr2	F
102132	mmu-miR-92a-3p	chr14	115044476	115044496	+	ENSMUSG00000004105	Angptl2	chr2	F
311632	mmu-miR-92a-3p	chrX	52741854	52741874	-	ENSMUSG00000004105	Angptl2	chr2	F
102133	mmu-miR-92a-3p	chr14	115044476	115044496	+	ENSMUSG00000056501	Cebpb	chr2	F
311633	mmu-miR-92a-3p	chrX	52741854	52741874	-	ENSMUSG00000056501	Cebpb	chr2	F
102134	mmu-miR-92a-3p	chr14	115044476	115044496	+	ENSMUSG00000027737	Slc7a11	chr3	F
311634	mmu-miR-92a-3p	chrX	52741854	52741874	-	ENSMUSG00000027737	Slc7a11	chr3	F
102135	mmu-miR-92a-3p	chr14	115044476	115044496	+	ENSMUSG00000028078	Dclk2	chr3	F
311635	mmu-miR-92a-3p	chrX	52741854	52741874	-	ENSMUSG00000028078	Dclk2	chr3	F
102136	mmu-miR-92a-3p	chr14	115044476	115044496	+	ENSMUSG00000032826	Ank2	chr3	F
311636	mmu-miR-92a-3p	chrX	52741854	52741874	-	ENSMUSG00000032826	Ank2	chr3	F
102137	mmu-miR-92a-3p	chr14	115044476	115044496	+	ENSMUSG00000033883	D3Ertd254e	chr3	F
311637	mmu-miR-92a-3p	chrX	52741854	52741874	-	ENSMUSG00000033883	D3Ertd254e	chr3	F
102138	mmu-miR-92a-3p	chr14	115044476	115044496	+	ENSMUSG00000049100	Pcdh10	chr3	F
311638	mmu-miR-92a-3p	chrX	52741854	52741874	-	ENSMUSG00000049100	Pcdh10	chr3	F
102139	mmu-miR-92a-3p	chr14	115044476	115044496	+	ENSMUSG00000028034	Fubp1	chr3	F
311639	mmu-miR-92a-3p	chrX	52741854	52741874	-	ENSMUSG00000028034	Fubp1	chr3	F
102140	mmu-miR-92a-3p	chr14	115044476	115044496	+	ENSMUSG00000028572	Hook1	chr4	F
311640	mmu-miR-92a-3p	chrX	52741854	52741874	-	ENSMUSG00000028572	Hook1	chr4	F
102141	mmu-miR-92a-3p	chr14	115044476	115044496	+	ENSMUSG00000028654	Mycl	chr4	F
311641	mmu-miR-92a-3p	chrX	52741854	52741874	-	ENSMUSG00000028654	Mycl	chr4	F
102142	mmu-miR-92a-3p	chr14	115044476	115044496	+	ENSMUSG00000039713	Plekhg5	chr4	F
311642	mmu-miR-92a-3p	chrX	52741854	52741874	-	ENSMUSG00000039713	Plekhg5	chr4	F
102143	mmu-miR-92a-3p	chr14	115044476	115044496	+	ENSMUSG00000039987	Phtf2	chr5	F
311643	mmu-miR-92a-3p	chrX	52741854	52741874	-	ENSMUSG00000039987	Phtf2	chr5	F
102144	mmu-miR-92a-3p	chr14	115044476	115044496	+	ENSMUSG00000041313	Slc7a1	chr5	F
311644	mmu-miR-92a-3p	chrX	52741854	52741874	-	ENSMUSG00000041313	Slc7a1	chr5	F
102145	mmu-miR-92a-3p	chr14	115044476	115044496	+	ENSMUSG00000039782	Cpeb2	chr5	F
311645	mmu-miR-92a-3p	chrX	52741854	52741874	-	ENSMUSG00000039782	Cpeb2	chr5	F
102146	mmu-miR-92a-3p	chr14	115044476	115044496	+	ENSMUSG00000061578	Ksr2	chr5	F
311646	mmu-miR-92a-3p	chrX	52741854	52741874	-	ENSMUSG00000061578	Ksr2	chr5	F
102147	mmu-miR-92a-3p	chr14	115044476	115044496	+	ENSMUSG00000029669	Tspan12	chr6	F
311647	mmu-miR-92a-3p	chrX	52741854	52741874	-	ENSMUSG00000029669	Tspan12	chr6	F
102148	mmu-miR-92a-3p	chr14	115044476	115044496	+	ENSMUSG00000030352	Tspan9	chr6	F
311648	mmu-miR-92a-3p	chrX	52741854	52741874	-	ENSMUSG00000030352	Tspan9	chr6	F
102149	mmu-miR-92a-3p	chr14	115044476	115044496	+	ENSMUSG00000030747	Dgat2	chr7	F
311649	mmu-miR-92a-3p	chrX	52741854	52741874	-	ENSMUSG00000030747	Dgat2	chr7	F
102150	mmu-miR-92a-3p	chr14	115044476	115044496	+	ENSMUSG00000001918	Slc1a5	chr7	F
311650	mmu-miR-92a-3p	chrX	52741854	52741874	-	ENSMUSG00000001918	Slc1a5	chr7	F
102151	mmu-miR-92a-3p	chr14	115044476	115044496	+	ENSMUSG00000030847	Bag3	chr7	F
311651	mmu-miR-92a-3p	chrX	52741854	52741874	-	ENSMUSG00000030847	Bag3	chr7	F
102152	mmu-miR-92a-3p	chr14	115044476	115044496	+	ENSMUSG00000031901	Dus2	chr8	F
311652	mmu-miR-92a-3p	chrX	52741854	52741874	-	ENSMUSG00000031901	Dus2	chr8	F
102153	mmu-miR-92a-3p	chr14	115044476	115044496	+	ENSMUSG00000031337	Mtm1	chrX	F
311653	mmu-miR-92a-3p	chrX	52741854	52741874	-	ENSMUSG00000031337	Mtm1	chrX	F
102154	mmu-miR-92a-3p	chr14	115044476	115044496	+	ENSMUSG00000031327	Chic1	chrX	F
311654	mmu-miR-92a-3p	chrX	52741854	52741874	-	ENSMUSG00000031327	Chic1	chrX	F
896	mmu-miR-9-5p	chr13	83738821	83738843	+	ENSMUSG00000026674	Ddr2	chr1	F
2041	mmu-miR-9-5p	chr3	88215613	88215635	+	ENSMUSG00000026674	Ddr2	chr1	F
2704	mmu-miR-9-5p	chr7	79505279	79505301	+	ENSMUSG00000026674	Ddr2	chr1	F
8961	mmu-miR-9-5p	chr13	83738821	83738843	+	ENSMUSG00000026628	Atf3	chr1	F
20411	mmu-miR-9-5p	chr3	88215613	88215635	+	ENSMUSG00000026628	Atf3	chr1	F
27041	mmu-miR-9-5p	chr7	79505279	79505301	+	ENSMUSG00000026628	Atf3	chr1	F
8962	mmu-miR-9-5p	chr13	83738821	83738843	+	ENSMUSG00000025931	Paqr8	chr1	F
20412	mmu-miR-9-5p	chr3	88215613	88215635	+	ENSMUSG00000025931	Paqr8	chr1	F
27042	mmu-miR-9-5p	chr7	79505279	79505301	+	ENSMUSG00000025931	Paqr8	chr1	F
8963	mmu-miR-9-5p	chr13	83738821	83738843	+	ENSMUSG00000026547	Tagln2	chr1	F
20413	mmu-miR-9-5p	chr3	88215613	88215635	+	ENSMUSG00000026547	Tagln2	chr1	F
27043	mmu-miR-9-5p	chr7	79505279	79505301	+	ENSMUSG00000026547	Tagln2	chr1	F
8964	mmu-miR-9-5p	chr13	83738821	83738843	+	ENSMUSG00000071359	Tbpl1	chr10	F
20414	mmu-miR-9-5p	chr3	88215613	88215635	+	ENSMUSG00000071359	Tbpl1	chr10	F
27044	mmu-miR-9-5p	chr7	79505279	79505301	+	ENSMUSG00000071359	Tbpl1	chr10	F
8965	mmu-miR-9-5p	chr13	83738821	83738843	+	ENSMUSG00000034591	Slc41a2	chr10	F
20415	mmu-miR-9-5p	chr3	88215613	88215635	+	ENSMUSG00000034591	Slc41a2	chr10	F
27045	mmu-miR-9-5p	chr7	79505279	79505301	+	ENSMUSG00000034591	Slc41a2	chr10	F
8966	mmu-miR-9-5p	chr13	83738821	83738843	+	ENSMUSG00000020256	Aldh1l2	chr10	F
20416	mmu-miR-9-5p	chr3	88215613	88215635	+	ENSMUSG00000020256	Aldh1l2	chr10	F
27046	mmu-miR-9-5p	chr7	79505279	79505301	+	ENSMUSG00000020256	Aldh1l2	chr10	F
8967	mmu-miR-9-5p	chr13	83738821	83738843	+	ENSMUSG00000039485	Tspyl4	chr10	F
20417	mmu-miR-9-5p	chr3	88215613	88215635	+	ENSMUSG00000039485	Tspyl4	chr10	F
27047	mmu-miR-9-5p	chr7	79505279	79505301	+	ENSMUSG00000039485	Tspyl4	chr10	F
8968	mmu-miR-9-5p	chr13	83738821	83738843	+	ENSMUSG00000020451	Limk2	chr11	F
20418	mmu-miR-9-5p	chr3	88215613	88215635	+	ENSMUSG00000020451	Limk2	chr11	F
27048	mmu-miR-9-5p	chr7	79505279	79505301	+	ENSMUSG00000020451	Limk2	chr11	F
8969	mmu-miR-9-5p	chr13	83738821	83738843	+	ENSMUSG00000003585	Sec14l2	chr11	F
20419	mmu-miR-9-5p	chr3	88215613	88215635	+	ENSMUSG00000003585	Sec14l2	chr11	F
27049	mmu-miR-9-5p	chr7	79505279	79505301	+	ENSMUSG00000003585	Sec14l2	chr11	F
89610	mmu-miR-9-5p	chr13	83738821	83738843	+	ENSMUSG00000041329	Atp1b2	chr11	F
204110	mmu-miR-9-5p	chr3	88215613	88215635	+	ENSMUSG00000041329	Atp1b2	chr11	F
270410	mmu-miR-9-5p	chr7	79505279	79505301	+	ENSMUSG00000041329	Atp1b2	chr11	F
89611	mmu-miR-9-5p	chr13	83738821	83738843	+	ENSMUSG00000017692	Rhbdl3	chr11	F
204111	mmu-miR-9-5p	chr3	88215613	88215635	+	ENSMUSG00000017692	Rhbdl3	chr11	F
270411	mmu-miR-9-5p	chr7	79505279	79505301	+	ENSMUSG00000017692	Rhbdl3	chr11	F
89612	mmu-miR-9-5p	chr13	83738821	83738843	+	ENSMUSG00000034442	Trmt5	chr12	F
204112	mmu-miR-9-5p	chr3	88215613	88215635	+	ENSMUSG00000034442	Trmt5	chr12	F
270412	mmu-miR-9-5p	chr7	79505279	79505301	+	ENSMUSG00000034442	Trmt5	chr12	F
89613	mmu-miR-9-5p	chr13	83738821	83738843	+	ENSMUSG00000056459	Zbtb25	chr12	F
204113	mmu-miR-9-5p	chr3	88215613	88215635	+	ENSMUSG00000056459	Zbtb25	chr12	F
270413	mmu-miR-9-5p	chr7	79505279	79505301	+	ENSMUSG00000056459	Zbtb25	chr12	F
89614	mmu-miR-9-5p	chr13	83738821	83738843	+	ENSMUSG00000042507	Elmsan1	chr12	F
204114	mmu-miR-9-5p	chr3	88215613	88215635	+	ENSMUSG00000042507	Elmsan1	chr12	F
270414	mmu-miR-9-5p	chr7	79505279	79505301	+	ENSMUSG00000042507	Elmsan1	chr12	F
89615	mmu-miR-9-5p	chr13	83738821	83738843	+	ENSMUSG00000020964	Sel1l	chr12	F
204115	mmu-miR-9-5p	chr3	88215613	88215635	+	ENSMUSG00000020964	Sel1l	chr12	F
270415	mmu-miR-9-5p	chr7	79505279	79505301	+	ENSMUSG00000020964	Sel1l	chr12	F
89616	mmu-miR-9-5p	chr13	83738821	83738843	+	ENSMUSG00000021189	Atxn3	chr12	F
204116	mmu-miR-9-5p	chr3	88215613	88215635	+	ENSMUSG00000021189	Atxn3	chr12	F
270416	mmu-miR-9-5p	chr7	79505279	79505301	+	ENSMUSG00000021189	Atxn3	chr12	F
89617	mmu-miR-9-5p	chr13	83738821	83738843	+	ENSMUSG00000001729	Akt1	chr12	F
204117	mmu-miR-9-5p	chr3	88215613	88215635	+	ENSMUSG00000001729	Akt1	chr12	F
270417	mmu-miR-9-5p	chr7	79505279	79505301	+	ENSMUSG00000001729	Akt1	chr12	F
89618	mmu-miR-9-5p	chr13	83738821	83738843	+	ENSMUSG00000035614	Togaram1	chr12	F
204118	mmu-miR-9-5p	chr3	88215613	88215635	+	ENSMUSG00000035614	Togaram1	chr12	F
270418	mmu-miR-9-5p	chr7	79505279	79505301	+	ENSMUSG00000035614	Togaram1	chr12	F
89619	mmu-miR-9-5p	chr13	83738821	83738843	+	ENSMUSG00000017843	Ppp2r5c	chr12	F
204119	mmu-miR-9-5p	chr3	88215613	88215635	+	ENSMUSG00000017843	Ppp2r5c	chr12	F
270419	mmu-miR-9-5p	chr7	79505279	79505301	+	ENSMUSG00000017843	Ppp2r5c	chr12	F
89620	mmu-miR-9-5p	chr13	83738821	83738843	+	ENSMUSG00000021275	Tecpr2	chr12	F
204120	mmu-miR-9-5p	chr3	88215613	88215635	+	ENSMUSG00000021275	Tecpr2	chr12	F
270420	mmu-miR-9-5p	chr7	79505279	79505301	+	ENSMUSG00000021275	Tecpr2	chr12	F
89621	mmu-miR-9-5p	chr13	83738821	83738843	+	ENSMUSG00000037896	Rcor1	chr12	F
204121	mmu-miR-9-5p	chr3	88215613	88215635	+	ENSMUSG00000037896	Rcor1	chr12	F
270421	mmu-miR-9-5p	chr7	79505279	79505301	+	ENSMUSG00000037896	Rcor1	chr12	F
89622	mmu-miR-9-5p	chr13	83738821	83738843	+	ENSMUSG00000021277	Traf3	chr12	F
204122	mmu-miR-9-5p	chr3	88215613	88215635	+	ENSMUSG00000021277	Traf3	chr12	F
270422	mmu-miR-9-5p	chr7	79505279	79505301	+	ENSMUSG00000021277	Traf3	chr12	F
89623	mmu-miR-9-5p	chr13	83738821	83738843	+	ENSMUSG00000045312	Lhfpl2	chr13	F
204123	mmu-miR-9-5p	chr3	88215613	88215635	+	ENSMUSG00000045312	Lhfpl2	chr13	F
270423	mmu-miR-9-5p	chr7	79505279	79505301	+	ENSMUSG00000045312	Lhfpl2	chr13	F
89624	mmu-miR-9-5p	chr13	83738821	83738843	+	ENSMUSG00000037697	Ddhd1	chr14	F
204124	mmu-miR-9-5p	chr3	88215613	88215635	+	ENSMUSG00000037697	Ddhd1	chr14	F
270424	mmu-miR-9-5p	chr7	79505279	79505301	+	ENSMUSG00000037697	Ddhd1	chr14	F
89625	mmu-miR-9-5p	chr13	83738821	83738843	+	ENSMUSG00000021738	Atxn7	chr14	F
204125	mmu-miR-9-5p	chr3	88215613	88215635	+	ENSMUSG00000021738	Atxn7	chr14	F
270425	mmu-miR-9-5p	chr7	79505279	79505301	+	ENSMUSG00000021738	Atxn7	chr14	F
89626	mmu-miR-9-5p	chr13	83738821	83738843	+	ENSMUSG00000021913	Ogdhl	chr14	F
204126	mmu-miR-9-5p	chr3	88215613	88215635	+	ENSMUSG00000021913	Ogdhl	chr14	F
270426	mmu-miR-9-5p	chr7	79505279	79505301	+	ENSMUSG00000021913	Ogdhl	chr14	F
89627	mmu-miR-9-5p	chr13	83738821	83738843	+	ENSMUSG00000040618	Pck2	chr14	F
204127	mmu-miR-9-5p	chr3	88215613	88215635	+	ENSMUSG00000040618	Pck2	chr14	F
270427	mmu-miR-9-5p	chr7	79505279	79505301	+	ENSMUSG00000040618	Pck2	chr14	F
89628	mmu-miR-9-5p	chr13	83738821	83738843	+	ENSMUSG00000022070	Bora	chr14	F
204128	mmu-miR-9-5p	chr3	88215613	88215635	+	ENSMUSG00000022070	Bora	chr14	F
270428	mmu-miR-9-5p	chr7	79505279	79505301	+	ENSMUSG00000022070	Bora	chr14	F
89629	mmu-miR-9-5p	chr13	83738821	83738843	+	ENSMUSG00000009739	Pou6f1	chr15	F
204129	mmu-miR-9-5p	chr3	88215613	88215635	+	ENSMUSG00000009739	Pou6f1	chr15	F
270429	mmu-miR-9-5p	chr7	79505279	79505301	+	ENSMUSG00000009739	Pou6f1	chr15	F
89630	mmu-miR-9-5p	chr13	83738821	83738843	+	ENSMUSG00000022816	Fstl1	chr16	F
204130	mmu-miR-9-5p	chr3	88215613	88215635	+	ENSMUSG00000022816	Fstl1	chr16	F
270430	mmu-miR-9-5p	chr7	79505279	79505301	+	ENSMUSG00000022816	Fstl1	chr16	F
89631	mmu-miR-9-5p	chr13	83738821	83738843	+	ENSMUSG00000023067	Cdkn1a	chr17	F
204131	mmu-miR-9-5p	chr3	88215613	88215635	+	ENSMUSG00000023067	Cdkn1a	chr17	F
270431	mmu-miR-9-5p	chr7	79505279	79505301	+	ENSMUSG00000023067	Cdkn1a	chr17	F
89632	mmu-miR-9-5p	chr13	83738821	83738843	+	ENSMUSG00000023952	Gtpbp2	chr17	F
204132	mmu-miR-9-5p	chr3	88215613	88215635	+	ENSMUSG00000023952	Gtpbp2	chr17	F
270432	mmu-miR-9-5p	chr7	79505279	79505301	+	ENSMUSG00000023952	Gtpbp2	chr17	F
89633	mmu-miR-9-5p	chr13	83738821	83738843	+	ENSMUSG00000040852	Plekhh2	chr17	F
204133	mmu-miR-9-5p	chr3	88215613	88215635	+	ENSMUSG00000040852	Plekhh2	chr17	F
270433	mmu-miR-9-5p	chr7	79505279	79505301	+	ENSMUSG00000040852	Plekhh2	chr17	F
89634	mmu-miR-9-5p	chr13	83738821	83738843	+	ENSMUSG00000024143	Rhoq	chr17	F
204134	mmu-miR-9-5p	chr3	88215613	88215635	+	ENSMUSG00000024143	Rhoq	chr17	F
270434	mmu-miR-9-5p	chr7	79505279	79505301	+	ENSMUSG00000024143	Rhoq	chr17	F
89635	mmu-miR-9-5p	chr13	83738821	83738843	+	ENSMUSG00000042834	Nrep	chr18	F
204135	mmu-miR-9-5p	chr3	88215613	88215635	+	ENSMUSG00000042834	Nrep	chr18	F
270435	mmu-miR-9-5p	chr7	79505279	79505301	+	ENSMUSG00000042834	Nrep	chr18	F
89636	mmu-miR-9-5p	chr13	83738821	83738843	+	ENSMUSG00000024427	Spry4	chr18	F
204136	mmu-miR-9-5p	chr3	88215613	88215635	+	ENSMUSG00000024427	Spry4	chr18	F
270436	mmu-miR-9-5p	chr7	79505279	79505301	+	ENSMUSG00000024427	Spry4	chr18	F
89637	mmu-miR-9-5p	chr13	83738821	83738843	+	ENSMUSG00000038418	Egr1	chr18	F
204137	mmu-miR-9-5p	chr3	88215613	88215635	+	ENSMUSG00000038418	Egr1	chr18	F
270437	mmu-miR-9-5p	chr7	79505279	79505301	+	ENSMUSG00000038418	Egr1	chr18	F
89638	mmu-miR-9-5p	chr13	83738821	83738843	+	ENSMUSG00000015090	Ptgds	chr2	F
204138	mmu-miR-9-5p	chr3	88215613	88215635	+	ENSMUSG00000015090	Ptgds	chr2	F
270438	mmu-miR-9-5p	chr7	79505279	79505301	+	ENSMUSG00000015090	Ptgds	chr2	F
89639	mmu-miR-9-5p	chr13	83738821	83738843	+	ENSMUSG00000005087	Cd44	chr2	F
204139	mmu-miR-9-5p	chr3	88215613	88215635	+	ENSMUSG00000005087	Cd44	chr2	F
270439	mmu-miR-9-5p	chr7	79505279	79505301	+	ENSMUSG00000005087	Cd44	chr2	F
89640	mmu-miR-9-5p	chr13	83738821	83738843	+	ENSMUSG00000027293	Ehd4	chr2	F
204140	mmu-miR-9-5p	chr3	88215613	88215635	+	ENSMUSG00000027293	Ehd4	chr2	F
270440	mmu-miR-9-5p	chr7	79505279	79505301	+	ENSMUSG00000027293	Ehd4	chr2	F
89641	mmu-miR-9-5p	chr13	83738821	83738843	+	ENSMUSG00000051379	Flrt3	chr2	F
204141	mmu-miR-9-5p	chr3	88215613	88215635	+	ENSMUSG00000051379	Flrt3	chr2	F
270441	mmu-miR-9-5p	chr7	79505279	79505301	+	ENSMUSG00000051379	Flrt3	chr2	F
89642	mmu-miR-9-5p	chr13	83738821	83738843	+	ENSMUSG00000032715	Trib3	chr2	F
204142	mmu-miR-9-5p	chr3	88215613	88215635	+	ENSMUSG00000032715	Trib3	chr2	F
270442	mmu-miR-9-5p	chr7	79505279	79505301	+	ENSMUSG00000032715	Trib3	chr2	F
89643	mmu-miR-9-5p	chr13	83738821	83738843	+	ENSMUSG00000026858	Miga2	chr2	F
204143	mmu-miR-9-5p	chr3	88215613	88215635	+	ENSMUSG00000026858	Miga2	chr2	F
270443	mmu-miR-9-5p	chr7	79505279	79505301	+	ENSMUSG00000026858	Miga2	chr2	F
89644	mmu-miR-9-5p	chr13	83738821	83738843	+	ENSMUSG00000026749	Nek6	chr2	F
204144	mmu-miR-9-5p	chr3	88215613	88215635	+	ENSMUSG00000026749	Nek6	chr2	F
270444	mmu-miR-9-5p	chr7	79505279	79505301	+	ENSMUSG00000026749	Nek6	chr2	F
89645	mmu-miR-9-5p	chr13	83738821	83738843	+	ENSMUSG00000053192	Mllt11	chr3	F
204145	mmu-miR-9-5p	chr3	88215613	88215635	+	ENSMUSG00000053192	Mllt11	chr3	F
270445	mmu-miR-9-5p	chr7	79505279	79505301	+	ENSMUSG00000053192	Mllt11	chr3	F
89646	mmu-miR-9-5p	chr13	83738821	83738843	+	ENSMUSG00000032826	Ank2	chr3	F
204146	mmu-miR-9-5p	chr3	88215613	88215635	+	ENSMUSG00000032826	Ank2	chr3	F
270446	mmu-miR-9-5p	chr7	79505279	79505301	+	ENSMUSG00000032826	Ank2	chr3	F
89647	mmu-miR-9-5p	chr13	83738821	83738843	+	ENSMUSG00000049100	Pcdh10	chr3	F
204147	mmu-miR-9-5p	chr3	88215613	88215635	+	ENSMUSG00000049100	Pcdh10	chr3	F
270447	mmu-miR-9-5p	chr7	79505279	79505301	+	ENSMUSG00000049100	Pcdh10	chr3	F
89648	mmu-miR-9-5p	chr13	83738821	83738843	+	ENSMUSG00000028518	Prkaa2	chr4	F
204148	mmu-miR-9-5p	chr3	88215613	88215635	+	ENSMUSG00000028518	Prkaa2	chr4	F
270448	mmu-miR-9-5p	chr7	79505279	79505301	+	ENSMUSG00000028518	Prkaa2	chr4	F
89649	mmu-miR-9-5p	chr13	83738821	83738843	+	ENSMUSG00000028893	Sesn2	chr4	F
204149	mmu-miR-9-5p	chr3	88215613	88215635	+	ENSMUSG00000028893	Sesn2	chr4	F
270449	mmu-miR-9-5p	chr7	79505279	79505301	+	ENSMUSG00000028893	Sesn2	chr4	F
89650	mmu-miR-9-5p	chr13	83738821	83738843	+	ENSMUSG00000028542	Slc6a9	chr4	F
204150	mmu-miR-9-5p	chr3	88215613	88215635	+	ENSMUSG00000028542	Slc6a9	chr4	F
270450	mmu-miR-9-5p	chr7	79505279	79505301	+	ENSMUSG00000028542	Slc6a9	chr4	F
89651	mmu-miR-9-5p	chr13	83738821	83738843	+	ENSMUSG00000073700	Klhl21	chr4	F
204151	mmu-miR-9-5p	chr3	88215613	88215635	+	ENSMUSG00000073700	Klhl21	chr4	F
270451	mmu-miR-9-5p	chr7	79505279	79505301	+	ENSMUSG00000073700	Klhl21	chr4	F
89652	mmu-miR-9-5p	chr13	83738821	83738843	+	ENSMUSG00000039987	Phtf2	chr5	F
204152	mmu-miR-9-5p	chr3	88215613	88215635	+	ENSMUSG00000039987	Phtf2	chr5	F
270452	mmu-miR-9-5p	chr7	79505279	79505301	+	ENSMUSG00000039987	Phtf2	chr5	F
89653	mmu-miR-9-5p	chr13	83738821	83738843	+	ENSMUSG00000039474	Wfs1	chr5	F
204153	mmu-miR-9-5p	chr3	88215613	88215635	+	ENSMUSG00000039474	Wfs1	chr5	F
270453	mmu-miR-9-5p	chr7	79505279	79505301	+	ENSMUSG00000039474	Wfs1	chr5	F
89654	mmu-miR-9-5p	chr13	83738821	83738843	+	ENSMUSG00000041313	Slc7a1	chr5	F
204154	mmu-miR-9-5p	chr3	88215613	88215635	+	ENSMUSG00000041313	Slc7a1	chr5	F
270454	mmu-miR-9-5p	chr7	79505279	79505301	+	ENSMUSG00000041313	Slc7a1	chr5	F
89655	mmu-miR-9-5p	chr13	83738821	83738843	+	ENSMUSG00000039782	Cpeb2	chr5	F
204155	mmu-miR-9-5p	chr3	88215613	88215635	+	ENSMUSG00000039782	Cpeb2	chr5	F
270455	mmu-miR-9-5p	chr7	79505279	79505301	+	ENSMUSG00000039782	Cpeb2	chr5	F
89656	mmu-miR-9-5p	chr13	83738821	83738843	+	ENSMUSG00000029381	Shroom3	chr5	F
204156	mmu-miR-9-5p	chr3	88215613	88215635	+	ENSMUSG00000029381	Shroom3	chr5	F
270456	mmu-miR-9-5p	chr7	79505279	79505301	+	ENSMUSG00000029381	Shroom3	chr5	F
89657	mmu-miR-9-5p	chr13	83738821	83738843	+	ENSMUSG00000051950	B3glct	chr5	F
204157	mmu-miR-9-5p	chr3	88215613	88215635	+	ENSMUSG00000051950	B3glct	chr5	F
270457	mmu-miR-9-5p	chr7	79505279	79505301	+	ENSMUSG00000051950	B3glct	chr5	F
89658	mmu-miR-9-5p	chr13	83738821	83738843	+	ENSMUSG00000005667	Mthfd2	chr6	F
204158	mmu-miR-9-5p	chr3	88215613	88215635	+	ENSMUSG00000005667	Mthfd2	chr6	F
270458	mmu-miR-9-5p	chr7	79505279	79505301	+	ENSMUSG00000005667	Mthfd2	chr6	F
89659	mmu-miR-9-5p	chr13	83738821	83738843	+	ENSMUSG00000030022	Adamts9	chr6	F
204159	mmu-miR-9-5p	chr3	88215613	88215635	+	ENSMUSG00000030022	Adamts9	chr6	F
270459	mmu-miR-9-5p	chr7	79505279	79505301	+	ENSMUSG00000030022	Adamts9	chr6	F
89660	mmu-miR-9-5p	chr13	83738821	83738843	+	ENSMUSG00000030352	Tspan9	chr6	F
204160	mmu-miR-9-5p	chr3	88215613	88215635	+	ENSMUSG00000030352	Tspan9	chr6	F
270460	mmu-miR-9-5p	chr7	79505279	79505301	+	ENSMUSG00000030352	Tspan9	chr6	F
89661	mmu-miR-9-5p	chr13	83738821	83738843	+	ENSMUSG00000002602	Axl	chr7	F
204161	mmu-miR-9-5p	chr3	88215613	88215635	+	ENSMUSG00000002602	Axl	chr7	F
270461	mmu-miR-9-5p	chr7	79505279	79505301	+	ENSMUSG00000002602	Axl	chr7	F
89662	mmu-miR-9-5p	chr13	83738821	83738843	+	ENSMUSG00000039062	Anpep	chr7	F
204162	mmu-miR-9-5p	chr3	88215613	88215635	+	ENSMUSG00000039062	Anpep	chr7	F
270462	mmu-miR-9-5p	chr7	79505279	79505301	+	ENSMUSG00000039062	Anpep	chr7	F
89663	mmu-miR-9-5p	chr13	83738821	83738843	+	ENSMUSG00000031026	Trim66	chr7	F
204163	mmu-miR-9-5p	chr3	88215613	88215635	+	ENSMUSG00000031026	Trim66	chr7	F
270463	mmu-miR-9-5p	chr7	79505279	79505301	+	ENSMUSG00000031026	Trim66	chr7	F
89664	mmu-miR-9-5p	chr13	83738821	83738843	+	ENSMUSG00000001918	Slc1a5	chr7	F
204164	mmu-miR-9-5p	chr3	88215613	88215635	+	ENSMUSG00000001918	Slc1a5	chr7	F
270464	mmu-miR-9-5p	chr7	79505279	79505301	+	ENSMUSG00000001918	Slc1a5	chr7	F
89665	mmu-miR-9-5p	chr13	83738821	83738843	+	ENSMUSG00000048078	Tenm4	chr7	F
204165	mmu-miR-9-5p	chr3	88215613	88215635	+	ENSMUSG00000048078	Tenm4	chr7	F
270465	mmu-miR-9-5p	chr7	79505279	79505301	+	ENSMUSG00000048078	Tenm4	chr7	F
89666	mmu-miR-9-5p	chr13	83738821	83738843	+	ENSMUSG00000037940	Inpp4b	chr8	F
204166	mmu-miR-9-5p	chr3	88215613	88215635	+	ENSMUSG00000037940	Inpp4b	chr8	F
270466	mmu-miR-9-5p	chr7	79505279	79505301	+	ENSMUSG00000037940	Inpp4b	chr8	F
89667	mmu-miR-9-5p	chr13	83738821	83738843	+	ENSMUSG00000033965	Slc16a2	chrX	F
204167	mmu-miR-9-5p	chr3	88215613	88215635	+	ENSMUSG00000033965	Slc16a2	chrX	F
270467	mmu-miR-9-5p	chr7	79505279	79505301	+	ENSMUSG00000033965	Slc16a2	chrX	F
89668	mmu-miR-9-5p	chr13	83738821	83738843	+	ENSMUSG00000031434	Morc4	chrX	F
204168	mmu-miR-9-5p	chr3	88215613	88215635	+	ENSMUSG00000031434	Morc4	chrX	F
270468	mmu-miR-9-5p	chr7	79505279	79505301	+	ENSMUSG00000031434	Morc4	chrX	F
897	mmu-miR-9-3p	chr13	83738858	83738879	+	ENSMUSG00000026674	Ddr2	chr1	F
2042	mmu-miR-9-3p	chr3	88215652	88215673	+	ENSMUSG00000026674	Ddr2	chr1	F
2705	mmu-miR-9-3p	chr7	79505318	79505339	+	ENSMUSG00000026674	Ddr2	chr1	F
8971	mmu-miR-9-3p	chr13	83738858	83738879	+	ENSMUSG00000002997	Prkar2b	chr12	F
20421	mmu-miR-9-3p	chr3	88215652	88215673	+	ENSMUSG00000002997	Prkar2b	chr12	F
27051	mmu-miR-9-3p	chr7	79505318	79505339	+	ENSMUSG00000002997	Prkar2b	chr12	F
8972	mmu-miR-9-3p	chr13	83738858	83738879	+	ENSMUSG00000034801	Sos2	chr12	F
20422	mmu-miR-9-3p	chr3	88215652	88215673	+	ENSMUSG00000034801	Sos2	chr12	F
27052	mmu-miR-9-3p	chr7	79505318	79505339	+	ENSMUSG00000034801	Sos2	chr12	F
8973	mmu-miR-9-3p	chr13	83738858	83738879	+	ENSMUSG00000021067	Sav1	chr12	F
20423	mmu-miR-9-3p	chr3	88215652	88215673	+	ENSMUSG00000021067	Sav1	chr12	F
27053	mmu-miR-9-3p	chr7	79505318	79505339	+	ENSMUSG00000021067	Sav1	chr12	F
8974	mmu-miR-9-3p	chr13	83738858	83738879	+	ENSMUSG00000021127	Zfp36l1	chr12	F
20424	mmu-miR-9-3p	chr3	88215652	88215673	+	ENSMUSG00000021127	Zfp36l1	chr12	F
27054	mmu-miR-9-3p	chr7	79505318	79505339	+	ENSMUSG00000021127	Zfp36l1	chr12	F
8975	mmu-miR-9-3p	chr13	83738858	83738879	+	ENSMUSG00000021096	Ppm1a	chr12	F
20425	mmu-miR-9-3p	chr3	88215652	88215673	+	ENSMUSG00000021096	Ppm1a	chr12	F
27055	mmu-miR-9-3p	chr7	79505318	79505339	+	ENSMUSG00000021096	Ppm1a	chr12	F
8976	mmu-miR-9-3p	chr13	83738858	83738879	+	ENSMUSG00000072825	Cep170b	chr12	F
20426	mmu-miR-9-3p	chr3	88215652	88215673	+	ENSMUSG00000072825	Cep170b	chr12	F
27056	mmu-miR-9-3p	chr7	79505318	79505339	+	ENSMUSG00000072825	Cep170b	chr12	F
8977	mmu-miR-9-3p	chr13	83738858	83738879	+	ENSMUSG00000022024	Sugt1	chr14	F
20427	mmu-miR-9-3p	chr3	88215652	88215673	+	ENSMUSG00000022024	Sugt1	chr14	F
27057	mmu-miR-9-3p	chr7	79505318	79505339	+	ENSMUSG00000022024	Sugt1	chr14	F
8978	mmu-miR-9-3p	chr13	83738858	83738879	+	ENSMUSG00000002489	Tiam1	chr16	F
20428	mmu-miR-9-3p	chr3	88215652	88215673	+	ENSMUSG00000002489	Tiam1	chr16	F
27058	mmu-miR-9-3p	chr7	79505318	79505339	+	ENSMUSG00000002489	Tiam1	chr16	F
8979	mmu-miR-9-3p	chr13	83738858	83738879	+	ENSMUSG00000046598	Bdh1	chr16	F
20429	mmu-miR-9-3p	chr3	88215652	88215673	+	ENSMUSG00000046598	Bdh1	chr16	F
27059	mmu-miR-9-3p	chr7	79505318	79505339	+	ENSMUSG00000046598	Bdh1	chr16	F
89710	mmu-miR-9-3p	chr13	83738858	83738879	+	ENSMUSG00000024085	Man2a1	chr17	F
204210	mmu-miR-9-3p	chr3	88215652	88215673	+	ENSMUSG00000024085	Man2a1	chr17	F
270510	mmu-miR-9-3p	chr7	79505318	79505339	+	ENSMUSG00000024085	Man2a1	chr17	F
89711	mmu-miR-9-3p	chr13	83738858	83738879	+	ENSMUSG00000027737	Slc7a11	chr3	F
204211	mmu-miR-9-3p	chr3	88215652	88215673	+	ENSMUSG00000027737	Slc7a11	chr3	F
270511	mmu-miR-9-3p	chr7	79505318	79505339	+	ENSMUSG00000027737	Slc7a11	chr3	F
89712	mmu-miR-9-3p	chr13	83738858	83738879	+	ENSMUSG00000053931	Cnn3	chr3	F
204212	mmu-miR-9-3p	chr3	88215652	88215673	+	ENSMUSG00000053931	Cnn3	chr3	F
270512	mmu-miR-9-3p	chr7	79505318	79505339	+	ENSMUSG00000053931	Cnn3	chr3	F
89713	mmu-miR-9-3p	chr13	83738858	83738879	+	ENSMUSG00000028034	Fubp1	chr3	F
204213	mmu-miR-9-3p	chr3	88215652	88215673	+	ENSMUSG00000028034	Fubp1	chr3	F
270513	mmu-miR-9-3p	chr7	79505318	79505339	+	ENSMUSG00000028034	Fubp1	chr3	F
89714	mmu-miR-9-3p	chr13	83738858	83738879	+	ENSMUSG00000039987	Phtf2	chr5	F
204214	mmu-miR-9-3p	chr3	88215652	88215673	+	ENSMUSG00000039987	Phtf2	chr5	F
270514	mmu-miR-9-3p	chr7	79505318	79505339	+	ENSMUSG00000039987	Phtf2	chr5	F
89715	mmu-miR-9-3p	chr13	83738858	83738879	+	ENSMUSG00000031654	Cbln1	chr8	F
204215	mmu-miR-9-3p	chr3	88215652	88215673	+	ENSMUSG00000031654	Cbln1	chr8	F
270515	mmu-miR-9-3p	chr7	79505318	79505339	+	ENSMUSG00000031654	Cbln1	chr8	F
89716	mmu-miR-9-3p	chr13	83738858	83738879	+	ENSMUSG00000031770	Herpud1	chr8	F
204216	mmu-miR-9-3p	chr3	88215652	88215673	+	ENSMUSG00000031770	Herpud1	chr8	F
270516	mmu-miR-9-3p	chr7	79505318	79505339	+	ENSMUSG00000031770	Herpud1	chr8	F
3172	mmu-miR-883b-3p	chrX	66789900	66789921	-	ENSMUSG00000044337	Ackr3	chr1	F
31721	mmu-miR-883b-3p	chrX	66789900	66789921	-	ENSMUSG00000026456	Cyb5r1	chr1	F
31722	mmu-miR-883b-3p	chrX	66789900	66789921	-	ENSMUSG00000063659	Zbtb18	chr1	F
31723	mmu-miR-883b-3p	chrX	66789900	66789921	-	ENSMUSG00000034591	Slc41a2	chr10	F
31724	mmu-miR-883b-3p	chrX	66789900	66789921	-	ENSMUSG00000039485	Tspyl4	chr10	F
31725	mmu-miR-883b-3p	chrX	66789900	66789921	-	ENSMUSG00000041329	Atp1b2	chr11	F
31726	mmu-miR-883b-3p	chrX	66789900	66789921	-	ENSMUSG00000020658	Efr3b	chr12	F
31727	mmu-miR-883b-3p	chrX	66789900	66789921	-	ENSMUSG00000021127	Zfp36l1	chr12	F
31728	mmu-miR-883b-3p	chrX	66789900	66789921	-	ENSMUSG00000020962	Gtf2a1	chr12	F
31729	mmu-miR-883b-3p	chrX	66789900	66789921	-	ENSMUSG00000041341	Atg2b	chr12	F
317210	mmu-miR-883b-3p	chrX	66789900	66789921	-	ENSMUSG00000035954	Dock4	chr12	F
317211	mmu-miR-883b-3p	chrX	66789900	66789921	-	ENSMUSG00000021109	Hif1a	chr12	F
317212	mmu-miR-883b-3p	chrX	66789900	66789921	-	ENSMUSG00000037896	Rcor1	chr12	F
317213	mmu-miR-883b-3p	chrX	66789900	66789921	-	ENSMUSG00000021831	Ero1l	chr14	F
317214	mmu-miR-883b-3p	chrX	66789900	66789921	-	ENSMUSG00000037697	Ddhd1	chr14	F
317215	mmu-miR-883b-3p	chrX	66789900	66789921	-	ENSMUSG00000021822	Plau	chr14	F
317216	mmu-miR-883b-3p	chrX	66789900	66789921	-	ENSMUSG00000021895	Arhgef3	chr14	F
317217	mmu-miR-883b-3p	chrX	66789900	66789921	-	ENSMUSG00000022358	Fbxo32	chr15	F
317218	mmu-miR-883b-3p	chrX	66789900	66789921	-	ENSMUSG00000009739	Pou6f1	chr15	F
317219	mmu-miR-883b-3p	chrX	66789900	66789921	-	ENSMUSG00000022587	Ly6e	chr15	F
317220	mmu-miR-883b-3p	chrX	66789900	66789921	-	ENSMUSG00000022416	Cacna1i	chr15	F
317221	mmu-miR-883b-3p	chrX	66789900	66789921	-	ENSMUSG00000043391	2510009E07Rik	chr16	F
317222	mmu-miR-883b-3p	chrX	66789900	66789921	-	ENSMUSG00000023067	Cdkn1a	chr17	F
317223	mmu-miR-883b-3p	chrX	66789900	66789921	-	ENSMUSG00000024085	Man2a1	chr17	F
317224	mmu-miR-883b-3p	chrX	66789900	66789921	-	ENSMUSG00000024143	Rhoq	chr17	F
317225	mmu-miR-883b-3p	chrX	66789900	66789921	-	ENSMUSG00000038418	Egr1	chr18	F
317226	mmu-miR-883b-3p	chrX	66789900	66789921	-	ENSMUSG00000024640	Psat1	chr19	F
317227	mmu-miR-883b-3p	chrX	66789900	66789921	-	ENSMUSG00000035778	Ggta1	chr2	F
317228	mmu-miR-883b-3p	chrX	66789900	66789921	-	ENSMUSG00000025314	Ptprj	chr2	F
317229	mmu-miR-883b-3p	chrX	66789900	66789921	-	ENSMUSG00000023206	Il15ra	chr2	F
317230	mmu-miR-883b-3p	chrX	66789900	66789921	-	ENSMUSG00000027947	Il6ra	chr3	F
317231	mmu-miR-883b-3p	chrX	66789900	66789921	-	ENSMUSG00000053192	Mllt11	chr3	F
317232	mmu-miR-883b-3p	chrX	66789900	66789921	-	ENSMUSG00000040412	5330417C22Rik	chr3	F
317233	mmu-miR-883b-3p	chrX	66789900	66789921	-	ENSMUSG00000028211	Trp53inp1	chr4	F
317234	mmu-miR-883b-3p	chrX	66789900	66789921	-	ENSMUSG00000028347	Tmeff1	chr4	F
317235	mmu-miR-883b-3p	chrX	66789900	66789921	-	ENSMUSG00000039987	Phtf2	chr5	F
317236	mmu-miR-883b-3p	chrX	66789900	66789921	-	ENSMUSG00000041313	Slc7a1	chr5	F
317237	mmu-miR-883b-3p	chrX	66789900	66789921	-	ENSMUSG00000058013	Sept11	chr5	F
317238	mmu-miR-883b-3p	chrX	66789900	66789921	-	ENSMUSG00000030987	Stim1	chr7	F
317239	mmu-miR-883b-3p	chrX	66789900	66789921	-	ENSMUSG00000040010	Slc7a5	chr8	F
317240	mmu-miR-883b-3p	chrX	66789900	66789921	-	ENSMUSG00000032549	Rab6b	chr9	F
3168	mmu-miR-883a-5p	chrX	66780803	66780824	-	ENSMUSG00000026674	Ddr2	chr1	F
31681	mmu-miR-883a-5p	chrX	66780803	66780824	-	ENSMUSG00000039354	Smarcal1	chr1	F
31682	mmu-miR-883a-5p	chrX	66780803	66780824	-	ENSMUSG00000026456	Cyb5r1	chr1	F
31683	mmu-miR-883a-5p	chrX	66780803	66780824	-	ENSMUSG00000069670	Nkain2	chr10	F
31684	mmu-miR-883a-5p	chrX	66780803	66780824	-	ENSMUSG00000019838	Slc16a10	chr10	F
31685	mmu-miR-883a-5p	chrX	66780803	66780824	-	ENSMUSG00000034591	Slc41a2	chr10	F
31686	mmu-miR-883a-5p	chrX	66780803	66780824	-	ENSMUSG00000020181	Nav3	chr10	F
31687	mmu-miR-883a-5p	chrX	66780803	66780824	-	ENSMUSG00000020325	Fstl3	chr10	F
31688	mmu-miR-883a-5p	chrX	66780803	66780824	-	ENSMUSG00000019894	Slc6a15	chr10	F
31689	mmu-miR-883a-5p	chrX	66780803	66780824	-	ENSMUSG00000020451	Limk2	chr11	F
316810	mmu-miR-883a-5p	chrX	66780803	66780824	-	ENSMUSG00000020142	Slc1a4	chr11	F
316811	mmu-miR-883a-5p	chrX	66780803	66780824	-	ENSMUSG00000041329	Atp1b2	chr11	F
316812	mmu-miR-883a-5p	chrX	66780803	66780824	-	ENSMUSG00000034801	Sos2	chr12	F
316813	mmu-miR-883a-5p	chrX	66780803	66780824	-	ENSMUSG00000021127	Zfp36l1	chr12	F
316814	mmu-miR-883a-5p	chrX	66780803	66780824	-	ENSMUSG00000020962	Gtf2a1	chr12	F
316815	mmu-miR-883a-5p	chrX	66780803	66780824	-	ENSMUSG00000021279	Cdc42bpb	chr12	F
316816	mmu-miR-883a-5p	chrX	66780803	66780824	-	ENSMUSG00000021109	Hif1a	chr12	F
316817	mmu-miR-883a-5p	chrX	66780803	66780824	-	ENSMUSG00000017843	Ppp2r5c	chr12	F
316818	mmu-miR-883a-5p	chrX	66780803	66780824	-	ENSMUSG00000021277	Traf3	chr12	F
316819	mmu-miR-883a-5p	chrX	66780803	66780824	-	ENSMUSG00000072825	Cep170b	chr12	F
316820	mmu-miR-883a-5p	chrX	66780803	66780824	-	ENSMUSG00000006356	Crip2	chr12	F
316821	mmu-miR-883a-5p	chrX	66780803	66780824	-	ENSMUSG00000045312	Lhfpl2	chr13	F
316822	mmu-miR-883a-5p	chrX	66780803	66780824	-	ENSMUSG00000037697	Ddhd1	chr14	F
316823	mmu-miR-883a-5p	chrX	66780803	66780824	-	ENSMUSG00000021738	Atxn7	chr14	F
316824	mmu-miR-883a-5p	chrX	66780803	66780824	-	ENSMUSG00000003469	Phyhip	chr14	F
316825	mmu-miR-883a-5p	chrX	66780803	66780824	-	ENSMUSG00000022070	Bora	chr14	F
316826	mmu-miR-883a-5p	chrX	66780803	66780824	-	ENSMUSG00000022416	Cacna1i	chr15	F
316827	mmu-miR-883a-5p	chrX	66780803	66780824	-	ENSMUSG00000046598	Bdh1	chr16	F
316828	mmu-miR-883a-5p	chrX	66780803	66780824	-	ENSMUSG00000022816	Fstl1	chr16	F
316829	mmu-miR-883a-5p	chrX	66780803	66780824	-	ENSMUSG00000024427	Spry4	chr18	F
316830	mmu-miR-883a-5p	chrX	66780803	66780824	-	ENSMUSG00000052026	Slc6a7	chr18	F
316831	mmu-miR-883a-5p	chrX	66780803	66780824	-	ENSMUSG00000024395	Lims2	chr18	F
316832	mmu-miR-883a-5p	chrX	66780803	66780824	-	ENSMUSG00000039982	Dtx4	chr19	F
316833	mmu-miR-883a-5p	chrX	66780803	66780824	-	ENSMUSG00000046324	Ermp1	chr19	F
316834	mmu-miR-883a-5p	chrX	66780803	66780824	-	ENSMUSG00000025007	Aldh18a1	chr19	F
316835	mmu-miR-883a-5p	chrX	66780803	66780824	-	ENSMUSG00000035778	Ggta1	chr2	F
316836	mmu-miR-883a-5p	chrX	66780803	66780824	-	ENSMUSG00000027175	Tcp11l1	chr2	F
316837	mmu-miR-883a-5p	chrX	66780803	66780824	-	ENSMUSG00000032715	Trib3	chr2	F
316838	mmu-miR-883a-5p	chrX	66780803	66780824	-	ENSMUSG00000037820	Tgm2	chr2	F
316839	mmu-miR-883a-5p	chrX	66780803	66780824	-	ENSMUSG00000026858	Miga2	chr2	F
316840	mmu-miR-883a-5p	chrX	66780803	66780824	-	ENSMUSG00000004105	Angptl2	chr2	F
316841	mmu-miR-883a-5p	chrX	66780803	66780824	-	ENSMUSG00000068735	Trp53i11	chr2	F
316842	mmu-miR-883a-5p	chrX	66780803	66780824	-	ENSMUSG00000028078	Dclk2	chr3	F
316843	mmu-miR-883a-5p	chrX	66780803	66780824	-	ENSMUSG00000033147	Slc22a15	chr3	F
316844	mmu-miR-883a-5p	chrX	66780803	66780824	-	ENSMUSG00000032826	Ank2	chr3	F
316845	mmu-miR-883a-5p	chrX	66780803	66780824	-	ENSMUSG00000053931	Cnn3	chr3	F
316846	mmu-miR-883a-5p	chrX	66780803	66780824	-	ENSMUSG00000055301	Adh7	chr3	F
316847	mmu-miR-883a-5p	chrX	66780803	66780824	-	ENSMUSG00000028838	Extl1	chr4	F
316848	mmu-miR-883a-5p	chrX	66780803	66780824	-	ENSMUSG00000028328	Tmod1	chr4	F
316849	mmu-miR-883a-5p	chrX	66780803	66780824	-	ENSMUSG00000028542	Slc6a9	chr4	F
316850	mmu-miR-883a-5p	chrX	66780803	66780824	-	ENSMUSG00000028654	Mycl	chr4	F
316851	mmu-miR-883a-5p	chrX	66780803	66780824	-	ENSMUSG00000028763	Hspg2	chr4	F
316852	mmu-miR-883a-5p	chrX	66780803	66780824	-	ENSMUSG00000039987	Phtf2	chr5	F
316853	mmu-miR-883a-5p	chrX	66780803	66780824	-	ENSMUSG00000037936	Scarb1	chr5	F
316854	mmu-miR-883a-5p	chrX	66780803	66780824	-	ENSMUSG00000041313	Slc7a1	chr5	F
316855	mmu-miR-883a-5p	chrX	66780803	66780824	-	ENSMUSG00000058013	Sept11	chr5	F
316856	mmu-miR-883a-5p	chrX	66780803	66780824	-	ENSMUSG00000029752	Asns	chr6	F
316857	mmu-miR-883a-5p	chrX	66780803	66780824	-	ENSMUSG00000005667	Mthfd2	chr6	F
316858	mmu-miR-883a-5p	chrX	66780803	66780824	-	ENSMUSG00000002602	Axl	chr7	F
316859	mmu-miR-883a-5p	chrX	66780803	66780824	-	ENSMUSG00000060402	Chst8	chr7	F
316860	mmu-miR-883a-5p	chrX	66780803	66780824	-	ENSMUSG00000039062	Anpep	chr7	F
316861	mmu-miR-883a-5p	chrX	66780803	66780824	-	ENSMUSG00000031026	Trim66	chr7	F
316862	mmu-miR-883a-5p	chrX	66780803	66780824	-	ENSMUSG00000054555	Adam12	chr7	F
316863	mmu-miR-883a-5p	chrX	66780803	66780824	-	ENSMUSG00000040010	Slc7a5	chr8	F
316864	mmu-miR-883a-5p	chrX	66780803	66780824	-	ENSMUSG00000004626	Stxbp2	chr8	F
316865	mmu-miR-883a-5p	chrX	66780803	66780824	-	ENSMUSG00000032232	Cgnl1	chr9	F
316866	mmu-miR-883a-5p	chrX	66780803	66780824	-	ENSMUSG00000032549	Rab6b	chr9	F
316867	mmu-miR-883a-5p	chrX	66780803	66780824	-	ENSMUSG00000033965	Slc16a2	chrX	F
3169	mmu-miR-883a-3p	chrX	66780768	66780789	-	ENSMUSG00000044337	Ackr3	chr1	F
31691	mmu-miR-883a-3p	chrX	66780768	66780789	-	ENSMUSG00000026456	Cyb5r1	chr1	F
31692	mmu-miR-883a-3p	chrX	66780768	66780789	-	ENSMUSG00000063659	Zbtb18	chr1	F
31693	mmu-miR-883a-3p	chrX	66780768	66780789	-	ENSMUSG00000034591	Slc41a2	chr10	F
31694	mmu-miR-883a-3p	chrX	66780768	66780789	-	ENSMUSG00000039485	Tspyl4	chr10	F
31695	mmu-miR-883a-3p	chrX	66780768	66780789	-	ENSMUSG00000041329	Atp1b2	chr11	F
31696	mmu-miR-883a-3p	chrX	66780768	66780789	-	ENSMUSG00000020658	Efr3b	chr12	F
31697	mmu-miR-883a-3p	chrX	66780768	66780789	-	ENSMUSG00000021127	Zfp36l1	chr12	F
31698	mmu-miR-883a-3p	chrX	66780768	66780789	-	ENSMUSG00000020962	Gtf2a1	chr12	F
31699	mmu-miR-883a-3p	chrX	66780768	66780789	-	ENSMUSG00000041341	Atg2b	chr12	F
316910	mmu-miR-883a-3p	chrX	66780768	66780789	-	ENSMUSG00000035954	Dock4	chr12	F
316911	mmu-miR-883a-3p	chrX	66780768	66780789	-	ENSMUSG00000021109	Hif1a	chr12	F
316912	mmu-miR-883a-3p	chrX	66780768	66780789	-	ENSMUSG00000037896	Rcor1	chr12	F
316913	mmu-miR-883a-3p	chrX	66780768	66780789	-	ENSMUSG00000021831	Ero1l	chr14	F
316914	mmu-miR-883a-3p	chrX	66780768	66780789	-	ENSMUSG00000037697	Ddhd1	chr14	F
316915	mmu-miR-883a-3p	chrX	66780768	66780789	-	ENSMUSG00000021822	Plau	chr14	F
316916	mmu-miR-883a-3p	chrX	66780768	66780789	-	ENSMUSG00000021895	Arhgef3	chr14	F
316917	mmu-miR-883a-3p	chrX	66780768	66780789	-	ENSMUSG00000022358	Fbxo32	chr15	F
316918	mmu-miR-883a-3p	chrX	66780768	66780789	-	ENSMUSG00000009739	Pou6f1	chr15	F
316919	mmu-miR-883a-3p	chrX	66780768	66780789	-	ENSMUSG00000022587	Ly6e	chr15	F
316920	mmu-miR-883a-3p	chrX	66780768	66780789	-	ENSMUSG00000022416	Cacna1i	chr15	F
316921	mmu-miR-883a-3p	chrX	66780768	66780789	-	ENSMUSG00000043391	2510009E07Rik	chr16	F
316922	mmu-miR-883a-3p	chrX	66780768	66780789	-	ENSMUSG00000023067	Cdkn1a	chr17	F
316923	mmu-miR-883a-3p	chrX	66780768	66780789	-	ENSMUSG00000024085	Man2a1	chr17	F
316924	mmu-miR-883a-3p	chrX	66780768	66780789	-	ENSMUSG00000024143	Rhoq	chr17	F
316925	mmu-miR-883a-3p	chrX	66780768	66780789	-	ENSMUSG00000038418	Egr1	chr18	F
316926	mmu-miR-883a-3p	chrX	66780768	66780789	-	ENSMUSG00000024640	Psat1	chr19	F
316927	mmu-miR-883a-3p	chrX	66780768	66780789	-	ENSMUSG00000035778	Ggta1	chr2	F
316928	mmu-miR-883a-3p	chrX	66780768	66780789	-	ENSMUSG00000025314	Ptprj	chr2	F
316929	mmu-miR-883a-3p	chrX	66780768	66780789	-	ENSMUSG00000023206	Il15ra	chr2	F
316930	mmu-miR-883a-3p	chrX	66780768	66780789	-	ENSMUSG00000027947	Il6ra	chr3	F
316931	mmu-miR-883a-3p	chrX	66780768	66780789	-	ENSMUSG00000053192	Mllt11	chr3	F
316932	mmu-miR-883a-3p	chrX	66780768	66780789	-	ENSMUSG00000040412	5330417C22Rik	chr3	F
316933	mmu-miR-883a-3p	chrX	66780768	66780789	-	ENSMUSG00000028211	Trp53inp1	chr4	F
316934	mmu-miR-883a-3p	chrX	66780768	66780789	-	ENSMUSG00000028347	Tmeff1	chr4	F
316935	mmu-miR-883a-3p	chrX	66780768	66780789	-	ENSMUSG00000039987	Phtf2	chr5	F
316936	mmu-miR-883a-3p	chrX	66780768	66780789	-	ENSMUSG00000041313	Slc7a1	chr5	F
316937	mmu-miR-883a-3p	chrX	66780768	66780789	-	ENSMUSG00000058013	Sept11	chr5	F
316938	mmu-miR-883a-3p	chrX	66780768	66780789	-	ENSMUSG00000030987	Stim1	chr7	F
316939	mmu-miR-883a-3p	chrX	66780768	66780789	-	ENSMUSG00000040010	Slc7a5	chr8	F
316940	mmu-miR-883a-3p	chrX	66780768	66780789	-	ENSMUSG00000032549	Rab6b	chr9	F
671	mmu-miR-882	chr12	109682207	109682228	+	ENSMUSG00000026674	Ddr2	chr1	T
6711	mmu-miR-882	chr12	109682207	109682228	+	ENSMUSG00000025931	Paqr8	chr1	T
6712	mmu-miR-882	chr12	109682207	109682228	+	ENSMUSG00000026547	Tagln2	chr1	T
6713	mmu-miR-882	chr12	109682207	109682228	+	ENSMUSG00000020262	Adarb1	chr10	T
6714	mmu-miR-882	chr12	109682207	109682228	+	ENSMUSG00000025403	Shmt2	chr10	T
6715	mmu-miR-882	chr12	109682207	109682228	+	ENSMUSG00000039485	Tspyl4	chr10	T
6716	mmu-miR-882	chr12	109682207	109682228	+	ENSMUSG00000034881	Tbxa2r	chr10	T
6717	mmu-miR-882	chr12	109682207	109682228	+	ENSMUSG00000020142	Slc1a4	chr11	T
6718	mmu-miR-882	chr12	109682207	109682228	+	ENSMUSG00000041329	Atp1b2	chr11	T
6719	mmu-miR-882	chr12	109682207	109682228	+	ENSMUSG00000046719	Nxph3	chr11	T
67110	mmu-miR-882	chr12	109682207	109682228	+	ENSMUSG00000034209	Rasl10a	chr11	T
67111	mmu-miR-882	chr12	109682207	109682228	+	ENSMUSG00000020886	Dlg4	chr11	T
67112	mmu-miR-882	chr12	109682207	109682228	+	ENSMUSG00000017692	Rhbdl3	chr11	T
67113	mmu-miR-882	chr12	109682207	109682228	+	ENSMUSG00000021127	Zfp36l1	chr12	T
67114	mmu-miR-882	chr12	109682207	109682228	+	ENSMUSG00000020962	Gtf2a1	chr12	T
67115	mmu-miR-882	chr12	109682207	109682228	+	ENSMUSG00000020964	Sel1l	chr12	T
67116	mmu-miR-882	chr12	109682207	109682228	+	ENSMUSG00000033530	Ttc7b	chr12	T
67117	mmu-miR-882	chr12	109682207	109682228	+	ENSMUSG00000021276	Cinp	chr12	T
67118	mmu-miR-882	chr12	109682207	109682228	+	ENSMUSG00000021279	Cdc42bpb	chr12	T
67119	mmu-miR-882	chr12	109682207	109682228	+	ENSMUSG00000001729	Akt1	chr12	T
67120	mmu-miR-882	chr12	109682207	109682228	+	ENSMUSG00000035954	Dock4	chr12	T
67121	mmu-miR-882	chr12	109682207	109682228	+	ENSMUSG00000021096	Ppm1a	chr12	T
67122	mmu-miR-882	chr12	109682207	109682228	+	ENSMUSG00000021275	Tecpr2	chr12	T
67123	mmu-miR-882	chr12	109682207	109682228	+	ENSMUSG00000037896	Rcor1	chr12	T
67124	mmu-miR-882	chr12	109682207	109682228	+	ENSMUSG00000021277	Traf3	chr12	T
67125	mmu-miR-882	chr12	109682207	109682228	+	ENSMUSG00000072825	Cep170b	chr12	T
67126	mmu-miR-882	chr12	109682207	109682228	+	ENSMUSG00000040618	Pck2	chr14	T
67127	mmu-miR-882	chr12	109682207	109682228	+	ENSMUSG00000022416	Cacna1i	chr15	T
67128	mmu-miR-882	chr12	109682207	109682228	+	ENSMUSG00000022456	Sept3	chr15	T
67129	mmu-miR-882	chr12	109682207	109682228	+	ENSMUSG00000039637	Coro7	chr16	T
67130	mmu-miR-882	chr12	109682207	109682228	+	ENSMUSG00000043391	2510009E07Rik	chr16	T
67131	mmu-miR-882	chr12	109682207	109682228	+	ENSMUSG00000046598	Bdh1	chr16	T
67132	mmu-miR-882	chr12	109682207	109682228	+	ENSMUSG00000022816	Fstl1	chr16	T
67133	mmu-miR-882	chr12	109682207	109682228	+	ENSMUSG00000061232	H2-K1	chr17	T
67134	mmu-miR-882	chr12	109682207	109682228	+	ENSMUSG00000033597	Caskin1	chr17	T
67135	mmu-miR-882	chr12	109682207	109682228	+	ENSMUSG00000023067	Cdkn1a	chr17	T
67136	mmu-miR-882	chr12	109682207	109682228	+	ENSMUSG00000023952	Gtpbp2	chr17	T
67137	mmu-miR-882	chr12	109682207	109682228	+	ENSMUSG00000024143	Rhoq	chr17	T
67138	mmu-miR-882	chr12	109682207	109682228	+	ENSMUSG00000024427	Spry4	chr18	T
67139	mmu-miR-882	chr12	109682207	109682228	+	ENSMUSG00000052026	Slc6a7	chr18	T
67140	mmu-miR-882	chr12	109682207	109682228	+	ENSMUSG00000024395	Lims2	chr18	T
67141	mmu-miR-882	chr12	109682207	109682228	+	ENSMUSG00000071847	Apcdd1	chr18	T
67142	mmu-miR-882	chr12	109682207	109682228	+	ENSMUSG00000024640	Psat1	chr19	T
67143	mmu-miR-882	chr12	109682207	109682228	+	ENSMUSG00000046324	Ermp1	chr19	T
67144	mmu-miR-882	chr12	109682207	109682228	+	ENSMUSG00000025007	Aldh18a1	chr19	T
67145	mmu-miR-882	chr12	109682207	109682228	+	ENSMUSG00000046805	Mpeg1	chr19	T
67146	mmu-miR-882	chr12	109682207	109682228	+	ENSMUSG00000025314	Ptprj	chr2	T
67147	mmu-miR-882	chr12	109682207	109682228	+	ENSMUSG00000005087	Cd44	chr2	T
67148	mmu-miR-882	chr12	109682207	109682228	+	ENSMUSG00000027293	Ehd4	chr2	T
67149	mmu-miR-882	chr12	109682207	109682228	+	ENSMUSG00000032715	Trib3	chr2	T
67150	mmu-miR-882	chr12	109682207	109682228	+	ENSMUSG00000004105	Angptl2	chr2	T
67151	mmu-miR-882	chr12	109682207	109682228	+	ENSMUSG00000026749	Nek6	chr2	T
67152	mmu-miR-882	chr12	109682207	109682228	+	ENSMUSG00000027737	Slc7a11	chr3	T
67153	mmu-miR-882	chr12	109682207	109682228	+	ENSMUSG00000028078	Dclk2	chr3	T
67154	mmu-miR-882	chr12	109682207	109682228	+	ENSMUSG00000053192	Mllt11	chr3	T
67155	mmu-miR-882	chr12	109682207	109682228	+	ENSMUSG00000049100	Pcdh10	chr3	T
67156	mmu-miR-882	chr12	109682207	109682228	+	ENSMUSG00000053931	Cnn3	chr3	T
67157	mmu-miR-882	chr12	109682207	109682228	+	ENSMUSG00000028838	Extl1	chr4	T
67158	mmu-miR-882	chr12	109682207	109682228	+	ENSMUSG00000028347	Tmeff1	chr4	T
67159	mmu-miR-882	chr12	109682207	109682228	+	ENSMUSG00000028654	Mycl	chr4	T
67160	mmu-miR-882	chr12	109682207	109682228	+	ENSMUSG00000073700	Klhl21	chr4	T
67161	mmu-miR-882	chr12	109682207	109682228	+	ENSMUSG00000041313	Slc7a1	chr5	T
67162	mmu-miR-882	chr12	109682207	109682228	+	ENSMUSG00000039782	Cpeb2	chr5	T
67163	mmu-miR-882	chr12	109682207	109682228	+	ENSMUSG00000034981	Parm1	chr5	T
67164	mmu-miR-882	chr12	109682207	109682228	+	ENSMUSG00000058013	Sept11	chr5	T
67165	mmu-miR-882	chr12	109682207	109682228	+	ENSMUSG00000030352	Tspan9	chr6	T
67166	mmu-miR-882	chr12	109682207	109682228	+	ENSMUSG00000057604	Lmcd1	chr6	T
67167	mmu-miR-882	chr12	109682207	109682228	+	ENSMUSG00000002602	Axl	chr7	T
67168	mmu-miR-882	chr12	109682207	109682228	+	ENSMUSG00000054555	Adam12	chr7	T
67169	mmu-miR-882	chr12	109682207	109682228	+	ENSMUSG00000061119	Prcp	chr7	T
67170	mmu-miR-882	chr12	109682207	109682228	+	ENSMUSG00000048078	Tenm4	chr7	T
67171	mmu-miR-882	chr12	109682207	109682228	+	ENSMUSG00000030987	Stim1	chr7	T
67172	mmu-miR-882	chr12	109682207	109682228	+	ENSMUSG00000040010	Slc7a5	chr8	T
67173	mmu-miR-882	chr12	109682207	109682228	+	ENSMUSG00000032549	Rab6b	chr9	T
67174	mmu-miR-882	chr12	109682207	109682228	+	ENSMUSG00000033965	Slc16a2	chrX	T
67175	mmu-miR-882	chr12	109682207	109682228	+	ENSMUSG00000019558	Slc6a8	chrX	T
3190	mmu-miR-881-3p	chrX	66801954	66801975	-	ENSMUSG00000026034	Clk1	chr1	F
31901	mmu-miR-881-3p	chrX	66801954	66801975	-	ENSMUSG00000026456	Cyb5r1	chr1	F
31902	mmu-miR-881-3p	chrX	66801954	66801975	-	ENSMUSG00000020262	Adarb1	chr10	F
31903	mmu-miR-881-3p	chrX	66801954	66801975	-	ENSMUSG00000020256	Aldh1l2	chr10	F
31904	mmu-miR-881-3p	chrX	66801954	66801975	-	ENSMUSG00000020181	Nav3	chr10	F
31905	mmu-miR-881-3p	chrX	66801954	66801975	-	ENSMUSG00000025357	Dgka	chr10	F
31906	mmu-miR-881-3p	chrX	66801954	66801975	-	ENSMUSG00000045193	Cirbp	chr10	F
31907	mmu-miR-881-3p	chrX	66801954	66801975	-	ENSMUSG00000003585	Sec14l2	chr11	F
31908	mmu-miR-881-3p	chrX	66801954	66801975	-	ENSMUSG00000020142	Slc1a4	chr11	F
31909	mmu-miR-881-3p	chrX	66801954	66801975	-	ENSMUSG00000002997	Prkar2b	chr12	F
319010	mmu-miR-881-3p	chrX	66801954	66801975	-	ENSMUSG00000020948	Klhl28	chr12	F
319011	mmu-miR-881-3p	chrX	66801954	66801975	-	ENSMUSG00000034761	Map4k5	chr12	F
319012	mmu-miR-881-3p	chrX	66801954	66801975	-	ENSMUSG00000021127	Zfp36l1	chr12	F
319013	mmu-miR-881-3p	chrX	66801954	66801975	-	ENSMUSG00000020964	Sel1l	chr12	F
319014	mmu-miR-881-3p	chrX	66801954	66801975	-	ENSMUSG00000021189	Atxn3	chr12	F
319015	mmu-miR-881-3p	chrX	66801954	66801975	-	ENSMUSG00000001175	Calm1	chr12	F
319016	mmu-miR-881-3p	chrX	66801954	66801975	-	ENSMUSG00000017843	Ppp2r5c	chr12	F
319017	mmu-miR-881-3p	chrX	66801954	66801975	-	ENSMUSG00000037896	Rcor1	chr12	F
319018	mmu-miR-881-3p	chrX	66801954	66801975	-	ENSMUSG00000021281	Tnfaip2	chr12	F
319019	mmu-miR-881-3p	chrX	66801954	66801975	-	ENSMUSG00000045312	Lhfpl2	chr13	F
319020	mmu-miR-881-3p	chrX	66801954	66801975	-	ENSMUSG00000037697	Ddhd1	chr14	F
319021	mmu-miR-881-3p	chrX	66801954	66801975	-	ENSMUSG00000022114	Spry2	chr14	F
319022	mmu-miR-881-3p	chrX	66801954	66801975	-	ENSMUSG00000025277	Abhd6	chr14	F
319023	mmu-miR-881-3p	chrX	66801954	66801975	-	ENSMUSG00000021895	Arhgef3	chr14	F
319024	mmu-miR-881-3p	chrX	66801954	66801975	-	ENSMUSG00000056069	Fam105a	chr15	F
319025	mmu-miR-881-3p	chrX	66801954	66801975	-	ENSMUSG00000009739	Pou6f1	chr15	F
319026	mmu-miR-881-3p	chrX	66801954	66801975	-	ENSMUSG00000043391	2510009E07Rik	chr16	F
319027	mmu-miR-881-3p	chrX	66801954	66801975	-	ENSMUSG00000033597	Caskin1	chr17	F
319028	mmu-miR-881-3p	chrX	66801954	66801975	-	ENSMUSG00000023952	Gtpbp2	chr17	F
319029	mmu-miR-881-3p	chrX	66801954	66801975	-	ENSMUSG00000024085	Man2a1	chr17	F
319030	mmu-miR-881-3p	chrX	66801954	66801975	-	ENSMUSG00000024143	Rhoq	chr17	F
319031	mmu-miR-881-3p	chrX	66801954	66801975	-	ENSMUSG00000046805	Mpeg1	chr19	F
319032	mmu-miR-881-3p	chrX	66801954	66801975	-	ENSMUSG00000017412	Cacnb4	chr2	F
319033	mmu-miR-881-3p	chrX	66801954	66801975	-	ENSMUSG00000025314	Ptprj	chr2	F
319034	mmu-miR-881-3p	chrX	66801954	66801975	-	ENSMUSG00000027175	Tcp11l1	chr2	F
319035	mmu-miR-881-3p	chrX	66801954	66801975	-	ENSMUSG00000027122	Arl14ep	chr2	F
319036	mmu-miR-881-3p	chrX	66801954	66801975	-	ENSMUSG00000027293	Ehd4	chr2	F
319037	mmu-miR-881-3p	chrX	66801954	66801975	-	ENSMUSG00000032715	Trib3	chr2	F
319038	mmu-miR-881-3p	chrX	66801954	66801975	-	ENSMUSG00000037820	Tgm2	chr2	F
319039	mmu-miR-881-3p	chrX	66801954	66801975	-	ENSMUSG00000001864	Aif1l	chr2	F
319040	mmu-miR-881-3p	chrX	66801954	66801975	-	ENSMUSG00000033910	Gucy1a1	chr3	F
319041	mmu-miR-881-3p	chrX	66801954	66801975	-	ENSMUSG00000028078	Dclk2	chr3	F
319042	mmu-miR-881-3p	chrX	66801954	66801975	-	ENSMUSG00000027931	Npr1	chr3	F
319043	mmu-miR-881-3p	chrX	66801954	66801975	-	ENSMUSG00000028034	Fubp1	chr3	F
319044	mmu-miR-881-3p	chrX	66801954	66801975	-	ENSMUSG00000028444	Cntfr	chr4	F
319045	mmu-miR-881-3p	chrX	66801954	66801975	-	ENSMUSG00000028518	Prkaa2	chr4	F
319046	mmu-miR-881-3p	chrX	66801954	66801975	-	ENSMUSG00000028328	Tmod1	chr4	F
319047	mmu-miR-881-3p	chrX	66801954	66801975	-	ENSMUSG00000028919	Arhgef19	chr4	F
319048	mmu-miR-881-3p	chrX	66801954	66801975	-	ENSMUSG00000037979	Ccdc92	chr5	F
319049	mmu-miR-881-3p	chrX	66801954	66801975	-	ENSMUSG00000041313	Slc7a1	chr5	F
319050	mmu-miR-881-3p	chrX	66801954	66801975	-	ENSMUSG00000039782	Cpeb2	chr5	F
319051	mmu-miR-881-3p	chrX	66801954	66801975	-	ENSMUSG00000058013	Sept11	chr5	F
319052	mmu-miR-881-3p	chrX	66801954	66801975	-	ENSMUSG00000036390	Gadd45a	chr6	F
319053	mmu-miR-881-3p	chrX	66801954	66801975	-	ENSMUSG00000002602	Axl	chr7	F
319054	mmu-miR-881-3p	chrX	66801954	66801975	-	ENSMUSG00000030878	Cdr2	chr7	F
319055	mmu-miR-881-3p	chrX	66801954	66801975	-	ENSMUSG00000040010	Slc7a5	chr8	F
319056	mmu-miR-881-3p	chrX	66801954	66801975	-	ENSMUSG00000032320	Rcn2	chr9	F
319057	mmu-miR-881-3p	chrX	66801954	66801975	-	ENSMUSG00000032549	Rab6b	chr9	F
3184	mmu-miR-880-3p	chrX	66800540	66800561	-	ENSMUSG00000026674	Ddr2	chr1	F
31841	mmu-miR-880-3p	chrX	66800540	66800561	-	ENSMUSG00000025931	Paqr8	chr1	F
31842	mmu-miR-880-3p	chrX	66800540	66800561	-	ENSMUSG00000026131	Dst	chr1	F
31843	mmu-miR-880-3p	chrX	66800540	66800561	-	ENSMUSG00000026207	Speg	chr1	F
31844	mmu-miR-880-3p	chrX	66800540	66800561	-	ENSMUSG00000038235	F11r	chr1	F
31845	mmu-miR-880-3p	chrX	66800540	66800561	-	ENSMUSG00000071359	Tbpl1	chr10	F
31846	mmu-miR-880-3p	chrX	66800540	66800561	-	ENSMUSG00000020451	Limk2	chr11	F
31847	mmu-miR-880-3p	chrX	66800540	66800561	-	ENSMUSG00000020142	Slc1a4	chr11	F
31848	mmu-miR-880-3p	chrX	66800540	66800561	-	ENSMUSG00000020948	Klhl28	chr12	F
31849	mmu-miR-880-3p	chrX	66800540	66800561	-	ENSMUSG00000034761	Map4k5	chr12	F
318410	mmu-miR-880-3p	chrX	66800540	66800561	-	ENSMUSG00000021127	Zfp36l1	chr12	F
318411	mmu-miR-880-3p	chrX	66800540	66800561	-	ENSMUSG00000020964	Sel1l	chr12	F
318412	mmu-miR-880-3p	chrX	66800540	66800561	-	ENSMUSG00000021276	Cinp	chr12	F
318413	mmu-miR-880-3p	chrX	66800540	66800561	-	ENSMUSG00000020668	Kif3c	chr12	F
318414	mmu-miR-880-3p	chrX	66800540	66800561	-	ENSMUSG00000035954	Dock4	chr12	F
318415	mmu-miR-880-3p	chrX	66800540	66800561	-	ENSMUSG00000044147	Arf6	chr12	F
318416	mmu-miR-880-3p	chrX	66800540	66800561	-	ENSMUSG00000021275	Tecpr2	chr12	F
318417	mmu-miR-880-3p	chrX	66800540	66800561	-	ENSMUSG00000021277	Traf3	chr12	F
318418	mmu-miR-880-3p	chrX	66800540	66800561	-	ENSMUSG00000037787	Apopt1	chr12	F
318419	mmu-miR-880-3p	chrX	66800540	66800561	-	ENSMUSG00000021453	Gadd45g	chr13	F
318420	mmu-miR-880-3p	chrX	66800540	66800561	-	ENSMUSG00000021738	Atxn7	chr14	F
318421	mmu-miR-880-3p	chrX	66800540	66800561	-	ENSMUSG00000079018	Ly6c1	chr15	F
318422	mmu-miR-880-3p	chrX	66800540	66800561	-	ENSMUSG00000022587	Ly6e	chr15	F
318423	mmu-miR-880-3p	chrX	66800540	66800561	-	ENSMUSG00000022456	Sept3	chr15	F
318424	mmu-miR-880-3p	chrX	66800540	66800561	-	ENSMUSG00000043391	2510009E07Rik	chr16	F
318425	mmu-miR-880-3p	chrX	66800540	66800561	-	ENSMUSG00000022816	Fstl1	chr16	F
318426	mmu-miR-880-3p	chrX	66800540	66800561	-	ENSMUSG00000023905	Tnfrsf12a	chr17	F
318427	mmu-miR-880-3p	chrX	66800540	66800561	-	ENSMUSG00000042834	Nrep	chr18	F
318428	mmu-miR-880-3p	chrX	66800540	66800561	-	ENSMUSG00000024427	Spry4	chr18	F
318429	mmu-miR-880-3p	chrX	66800540	66800561	-	ENSMUSG00000038418	Egr1	chr18	F
318430	mmu-miR-880-3p	chrX	66800540	66800561	-	ENSMUSG00000071847	Apcdd1	chr18	F
318431	mmu-miR-880-3p	chrX	66800540	66800561	-	ENSMUSG00000039982	Dtx4	chr19	F
318432	mmu-miR-880-3p	chrX	66800540	66800561	-	ENSMUSG00000024817	Uhrf2	chr19	F
318433	mmu-miR-880-3p	chrX	66800540	66800561	-	ENSMUSG00000025314	Ptprj	chr2	F
318434	mmu-miR-880-3p	chrX	66800540	66800561	-	ENSMUSG00000027122	Arl14ep	chr2	F
318435	mmu-miR-880-3p	chrX	66800540	66800561	-	ENSMUSG00000032826	Ank2	chr3	F
318436	mmu-miR-880-3p	chrX	66800540	66800561	-	ENSMUSG00000039158	Akna	chr4	F
318437	mmu-miR-880-3p	chrX	66800540	66800561	-	ENSMUSG00000028838	Extl1	chr4	F
318438	mmu-miR-880-3p	chrX	66800540	66800561	-	ENSMUSG00000028211	Trp53inp1	chr4	F
318439	mmu-miR-880-3p	chrX	66800540	66800561	-	ENSMUSG00000028763	Hspg2	chr4	F
318440	mmu-miR-880-3p	chrX	66800540	66800561	-	ENSMUSG00000073700	Klhl21	chr4	F
318441	mmu-miR-880-3p	chrX	66800540	66800561	-	ENSMUSG00000039713	Plekhg5	chr4	F
318442	mmu-miR-880-3p	chrX	66800540	66800561	-	ENSMUSG00000041313	Slc7a1	chr5	F
318443	mmu-miR-880-3p	chrX	66800540	66800561	-	ENSMUSG00000058013	Sept11	chr5	F
318444	mmu-miR-880-3p	chrX	66800540	66800561	-	ENSMUSG00000002602	Axl	chr7	F
318445	mmu-miR-880-3p	chrX	66800540	66800561	-	ENSMUSG00000054555	Adam12	chr7	F
318446	mmu-miR-880-3p	chrX	66800540	66800561	-	ENSMUSG00000048078	Tenm4	chr7	F
318447	mmu-miR-880-3p	chrX	66800540	66800561	-	ENSMUSG00000032232	Cgnl1	chr9	F
318448	mmu-miR-880-3p	chrX	66800540	66800561	-	ENSMUSG00000032549	Rab6b	chr9	F
318449	mmu-miR-880-3p	chrX	66800540	66800561	-	ENSMUSG00000033965	Slc16a2	chrX	F
318450	mmu-miR-880-3p	chrX	66800540	66800561	-	ENSMUSG00000015217	Hmgb3	chrX	F
318451	mmu-miR-880-3p	chrX	66800540	66800561	-	ENSMUSG00000019558	Slc6a8	chrX	F
2265	mmu-miR-879-5p	chr5	9375714	9375734	+	ENSMUSG00000038235	F11r	chr1	F
22651	mmu-miR-879-5p	chr5	9375714	9375734	+	ENSMUSG00000063659	Zbtb18	chr1	F
22652	mmu-miR-879-5p	chr5	9375714	9375734	+	ENSMUSG00000019838	Slc16a10	chr10	F
22653	mmu-miR-879-5p	chr5	9375714	9375734	+	ENSMUSG00000020262	Adarb1	chr10	F
22654	mmu-miR-879-5p	chr5	9375714	9375734	+	ENSMUSG00000025403	Shmt2	chr10	F
22655	mmu-miR-879-5p	chr5	9375714	9375734	+	ENSMUSG00000039485	Tspyl4	chr10	F
22656	mmu-miR-879-5p	chr5	9375714	9375734	+	ENSMUSG00000003585	Sec14l2	chr11	F
22657	mmu-miR-879-5p	chr5	9375714	9375734	+	ENSMUSG00000041329	Atp1b2	chr11	F
22658	mmu-miR-879-5p	chr5	9375714	9375734	+	ENSMUSG00000061666	Gdpd1	chr11	F
22659	mmu-miR-879-5p	chr5	9375714	9375734	+	ENSMUSG00000020658	Efr3b	chr12	F
226510	mmu-miR-879-5p	chr5	9375714	9375734	+	ENSMUSG00000059436	Max	chr12	F
226511	mmu-miR-879-5p	chr5	9375714	9375734	+	ENSMUSG00000021127	Zfp36l1	chr12	F
226512	mmu-miR-879-5p	chr5	9375714	9375734	+	ENSMUSG00000015143	Actn1	chr12	F
226513	mmu-miR-879-5p	chr5	9375714	9375734	+	ENSMUSG00000042507	Elmsan1	chr12	F
226514	mmu-miR-879-5p	chr5	9375714	9375734	+	ENSMUSG00000020964	Sel1l	chr12	F
226515	mmu-miR-879-5p	chr5	9375714	9375734	+	ENSMUSG00000054150	Syne3	chr12	F
226516	mmu-miR-879-5p	chr5	9375714	9375734	+	ENSMUSG00000021266	Wars	chr12	F
226517	mmu-miR-879-5p	chr5	9375714	9375734	+	ENSMUSG00000021276	Cinp	chr12	F
226518	mmu-miR-879-5p	chr5	9375714	9375734	+	ENSMUSG00000035597	Prpf39	chr12	F
226519	mmu-miR-879-5p	chr5	9375714	9375734	+	ENSMUSG00000021109	Hif1a	chr12	F
226520	mmu-miR-879-5p	chr5	9375714	9375734	+	ENSMUSG00000021275	Tecpr2	chr12	F
226521	mmu-miR-879-5p	chr5	9375714	9375734	+	ENSMUSG00000021277	Traf3	chr12	F
226522	mmu-miR-879-5p	chr5	9375714	9375734	+	ENSMUSG00000021831	Ero1l	chr14	F
226523	mmu-miR-879-5p	chr5	9375714	9375734	+	ENSMUSG00000021738	Atxn7	chr14	F
226524	mmu-miR-879-5p	chr5	9375714	9375734	+	ENSMUSG00000022416	Cacna1i	chr15	F
226525	mmu-miR-879-5p	chr5	9375714	9375734	+	ENSMUSG00000022456	Sept3	chr15	F
226526	mmu-miR-879-5p	chr5	9375714	9375734	+	ENSMUSG00000041205	Map6d1	chr16	F
226527	mmu-miR-879-5p	chr5	9375714	9375734	+	ENSMUSG00000043391	2510009E07Rik	chr16	F
226528	mmu-miR-879-5p	chr5	9375714	9375734	+	ENSMUSG00000022816	Fstl1	chr16	F
226529	mmu-miR-879-5p	chr5	9375714	9375734	+	ENSMUSG00000023905	Tnfrsf12a	chr17	F
226530	mmu-miR-879-5p	chr5	9375714	9375734	+	ENSMUSG00000023886	Smoc2	chr17	F
226531	mmu-miR-879-5p	chr5	9375714	9375734	+	ENSMUSG00000040852	Plekhh2	chr17	F
226532	mmu-miR-879-5p	chr5	9375714	9375734	+	ENSMUSG00000042834	Nrep	chr18	F
226533	mmu-miR-879-5p	chr5	9375714	9375734	+	ENSMUSG00000024427	Spry4	chr18	F
226534	mmu-miR-879-5p	chr5	9375714	9375734	+	ENSMUSG00000052026	Slc6a7	chr18	F
226535	mmu-miR-879-5p	chr5	9375714	9375734	+	ENSMUSG00000046324	Ermp1	chr19	F
226536	mmu-miR-879-5p	chr5	9375714	9375734	+	ENSMUSG00000025007	Aldh18a1	chr19	F
226537	mmu-miR-879-5p	chr5	9375714	9375734	+	ENSMUSG00000053617	Sh3pxd2a	chr19	F
226538	mmu-miR-879-5p	chr5	9375714	9375734	+	ENSMUSG00000046805	Mpeg1	chr19	F
226539	mmu-miR-879-5p	chr5	9375714	9375734	+	ENSMUSG00000017412	Cacnb4	chr2	F
226540	mmu-miR-879-5p	chr5	9375714	9375734	+	ENSMUSG00000005087	Cd44	chr2	F
226541	mmu-miR-879-5p	chr5	9375714	9375734	+	ENSMUSG00000032715	Trib3	chr2	F
226542	mmu-miR-879-5p	chr5	9375714	9375734	+	ENSMUSG00000037820	Tgm2	chr2	F
226543	mmu-miR-879-5p	chr5	9375714	9375734	+	ENSMUSG00000026833	Olfm1	chr2	F
226544	mmu-miR-879-5p	chr5	9375714	9375734	+	ENSMUSG00000004105	Angptl2	chr2	F
226545	mmu-miR-879-5p	chr5	9375714	9375734	+	ENSMUSG00000026749	Nek6	chr2	F
226546	mmu-miR-879-5p	chr5	9375714	9375734	+	ENSMUSG00000028078	Dclk2	chr3	F
226547	mmu-miR-879-5p	chr5	9375714	9375734	+	ENSMUSG00000053192	Mllt11	chr3	F
226548	mmu-miR-879-5p	chr5	9375714	9375734	+	ENSMUSG00000032826	Ank2	chr3	F
226549	mmu-miR-879-5p	chr5	9375714	9375734	+	ENSMUSG00000028444	Cntfr	chr4	F
226550	mmu-miR-879-5p	chr5	9375714	9375734	+	ENSMUSG00000039158	Akna	chr4	F
226551	mmu-miR-879-5p	chr5	9375714	9375734	+	ENSMUSG00000028838	Extl1	chr4	F
226552	mmu-miR-879-5p	chr5	9375714	9375734	+	ENSMUSG00000028211	Trp53inp1	chr4	F
226553	mmu-miR-879-5p	chr5	9375714	9375734	+	ENSMUSG00000028542	Slc6a9	chr4	F
226554	mmu-miR-879-5p	chr5	9375714	9375734	+	ENSMUSG00000028763	Hspg2	chr4	F
226555	mmu-miR-879-5p	chr5	9375714	9375734	+	ENSMUSG00000073700	Klhl21	chr4	F
226556	mmu-miR-879-5p	chr5	9375714	9375734	+	ENSMUSG00000039713	Plekhg5	chr4	F
226557	mmu-miR-879-5p	chr5	9375714	9375734	+	ENSMUSG00000039987	Phtf2	chr5	F
226558	mmu-miR-879-5p	chr5	9375714	9375734	+	ENSMUSG00000041313	Slc7a1	chr5	F
226559	mmu-miR-879-5p	chr5	9375714	9375734	+	ENSMUSG00000039782	Cpeb2	chr5	F
226560	mmu-miR-879-5p	chr5	9375714	9375734	+	ENSMUSG00000058013	Sept11	chr5	F
226561	mmu-miR-879-5p	chr5	9375714	9375734	+	ENSMUSG00000030352	Tspan9	chr6	F
226562	mmu-miR-879-5p	chr5	9375714	9375734	+	ENSMUSG00000030276	Ttll3	chr6	F
226563	mmu-miR-879-5p	chr5	9375714	9375734	+	ENSMUSG00000030761	Myo7a	chr7	F
226564	mmu-miR-879-5p	chr5	9375714	9375734	+	ENSMUSG00000054555	Adam12	chr7	F
226565	mmu-miR-879-5p	chr5	9375714	9375734	+	ENSMUSG00000032232	Cgnl1	chr9	F
226566	mmu-miR-879-5p	chr5	9375714	9375734	+	ENSMUSG00000040204	Pclaf	chr9	F
226567	mmu-miR-879-5p	chr5	9375714	9375734	+	ENSMUSG00000032549	Rab6b	chr9	F
226568	mmu-miR-879-5p	chr5	9375714	9375734	+	ENSMUSG00000033965	Slc16a2	chrX	F
226569	mmu-miR-879-5p	chr5	9375714	9375734	+	ENSMUSG00000019558	Slc6a8	chrX	F
3186	mmu-miR-878-5p	chrX	66801554	66801575	-	ENSMUSG00000026674	Ddr2	chr1	F
31861	mmu-miR-878-5p	chrX	66801554	66801575	-	ENSMUSG00000025357	Dgka	chr10	F
31862	mmu-miR-878-5p	chrX	66801554	66801575	-	ENSMUSG00000003585	Sec14l2	chr11	F
31863	mmu-miR-878-5p	chrX	66801554	66801575	-	ENSMUSG00000017692	Rhbdl3	chr11	F
31864	mmu-miR-878-5p	chrX	66801554	66801575	-	ENSMUSG00000021127	Zfp36l1	chr12	F
31865	mmu-miR-878-5p	chrX	66801554	66801575	-	ENSMUSG00000020964	Sel1l	chr12	F
31866	mmu-miR-878-5p	chrX	66801554	66801575	-	ENSMUSG00000035954	Dock4	chr12	F
31867	mmu-miR-878-5p	chrX	66801554	66801575	-	ENSMUSG00000044147	Arf6	chr12	F
31868	mmu-miR-878-5p	chrX	66801554	66801575	-	ENSMUSG00000022034	Esco2	chr14	F
31869	mmu-miR-878-5p	chrX	66801554	66801575	-	ENSMUSG00000022033	Pbk	chr14	F
318610	mmu-miR-878-5p	chrX	66801554	66801575	-	ENSMUSG00000022416	Cacna1i	chr15	F
318611	mmu-miR-878-5p	chrX	66801554	66801575	-	ENSMUSG00000046598	Bdh1	chr16	F
318612	mmu-miR-878-5p	chrX	66801554	66801575	-	ENSMUSG00000022816	Fstl1	chr16	F
318613	mmu-miR-878-5p	chrX	66801554	66801575	-	ENSMUSG00000024143	Rhoq	chr17	F
318614	mmu-miR-878-5p	chrX	66801554	66801575	-	ENSMUSG00000042834	Nrep	chr18	F
318615	mmu-miR-878-5p	chrX	66801554	66801575	-	ENSMUSG00000005087	Cd44	chr2	F
318616	mmu-miR-878-5p	chrX	66801554	66801575	-	ENSMUSG00000027122	Arl14ep	chr2	F
318617	mmu-miR-878-5p	chrX	66801554	66801575	-	ENSMUSG00000027293	Ehd4	chr2	F
318618	mmu-miR-878-5p	chrX	66801554	66801575	-	ENSMUSG00000037820	Tgm2	chr2	F
318619	mmu-miR-878-5p	chrX	66801554	66801575	-	ENSMUSG00000042851	Zc3h6	chr2	F
318620	mmu-miR-878-5p	chrX	66801554	66801575	-	ENSMUSG00000032826	Ank2	chr3	F
318621	mmu-miR-878-5p	chrX	66801554	66801575	-	ENSMUSG00000028893	Sesn2	chr4	F
318622	mmu-miR-878-5p	chrX	66801554	66801575	-	ENSMUSG00000028211	Trp53inp1	chr4	F
318623	mmu-miR-878-5p	chrX	66801554	66801575	-	ENSMUSG00000028572	Hook1	chr4	F
318624	mmu-miR-878-5p	chrX	66801554	66801575	-	ENSMUSG00000051950	B3glct	chr5	F
318625	mmu-miR-878-5p	chrX	66801554	66801575	-	ENSMUSG00000002602	Axl	chr7	F
318626	mmu-miR-878-5p	chrX	66801554	66801575	-	ENSMUSG00000039062	Anpep	chr7	F
318627	mmu-miR-878-5p	chrX	66801554	66801575	-	ENSMUSG00000031026	Trim66	chr7	F
318628	mmu-miR-878-5p	chrX	66801554	66801575	-	ENSMUSG00000025324	Atp10a	chr7	F
318629	mmu-miR-878-5p	chrX	66801554	66801575	-	ENSMUSG00000048078	Tenm4	chr7	F
318630	mmu-miR-878-5p	chrX	66801554	66801575	-	ENSMUSG00000030847	Bag3	chr7	F
318631	mmu-miR-878-5p	chrX	66801554	66801575	-	ENSMUSG00000039470	Zdhhc2	chr8	F
318632	mmu-miR-878-5p	chrX	66801554	66801575	-	ENSMUSG00000031337	Mtm1	chrX	F
3187	mmu-miR-878-3p	chrX	66801518	66801539	-	ENSMUSG00000026674	Ddr2	chr1	F
31871	mmu-miR-878-3p	chrX	66801518	66801539	-	ENSMUSG00000019852	Arfgef3	chr10	F
31872	mmu-miR-878-3p	chrX	66801518	66801539	-	ENSMUSG00000020262	Adarb1	chr10	F
31873	mmu-miR-878-3p	chrX	66801518	66801539	-	ENSMUSG00000020949	Fkbp3	chr12	F
31874	mmu-miR-878-3p	chrX	66801518	66801539	-	ENSMUSG00000021236	Entpd5	chr12	F
31875	mmu-miR-878-3p	chrX	66801518	66801539	-	ENSMUSG00000061533	Cep128	chr12	F
31876	mmu-miR-878-3p	chrX	66801518	66801539	-	ENSMUSG00000020964	Sel1l	chr12	F
31877	mmu-miR-878-3p	chrX	66801518	66801539	-	ENSMUSG00000021189	Atxn3	chr12	F
31878	mmu-miR-878-3p	chrX	66801518	66801539	-	ENSMUSG00000021109	Hif1a	chr12	F
31879	mmu-miR-878-3p	chrX	66801518	66801539	-	ENSMUSG00000021226	Acot2	chr12	F
318710	mmu-miR-878-3p	chrX	66801518	66801539	-	ENSMUSG00000021275	Tecpr2	chr12	F
318711	mmu-miR-878-3p	chrX	66801518	66801539	-	ENSMUSG00000021277	Traf3	chr12	F
318712	mmu-miR-878-3p	chrX	66801518	66801539	-	ENSMUSG00000021281	Tnfaip2	chr12	F
318713	mmu-miR-878-3p	chrX	66801518	66801539	-	ENSMUSG00000072825	Cep170b	chr12	F
318714	mmu-miR-878-3p	chrX	66801518	66801539	-	ENSMUSG00000021831	Ero1l	chr14	F
318715	mmu-miR-878-3p	chrX	66801518	66801539	-	ENSMUSG00000021895	Arhgef3	chr14	F
318716	mmu-miR-878-3p	chrX	66801518	66801539	-	ENSMUSG00000043391	2510009E07Rik	chr16	F
318717	mmu-miR-878-3p	chrX	66801518	66801539	-	ENSMUSG00000022911	Arl13b	chr16	F
318718	mmu-miR-878-3p	chrX	66801518	66801539	-	ENSMUSG00000002489	Tiam1	chr16	F
318719	mmu-miR-878-3p	chrX	66801518	66801539	-	ENSMUSG00000024143	Rhoq	chr17	F
318720	mmu-miR-878-3p	chrX	66801518	66801539	-	ENSMUSG00000024640	Psat1	chr19	F
318721	mmu-miR-878-3p	chrX	66801518	66801539	-	ENSMUSG00000027122	Arl14ep	chr2	F
318722	mmu-miR-878-3p	chrX	66801518	66801539	-	ENSMUSG00000026833	Olfm1	chr2	F
318723	mmu-miR-878-3p	chrX	66801518	66801539	-	ENSMUSG00000027737	Slc7a11	chr3	F
318724	mmu-miR-878-3p	chrX	66801518	66801539	-	ENSMUSG00000033883	D3Ertd254e	chr3	F
318725	mmu-miR-878-3p	chrX	66801518	66801539	-	ENSMUSG00000053931	Cnn3	chr3	F
318726	mmu-miR-878-3p	chrX	66801518	66801539	-	ENSMUSG00000028034	Fubp1	chr3	F
318727	mmu-miR-878-3p	chrX	66801518	66801539	-	ENSMUSG00000039713	Plekhg5	chr4	F
318728	mmu-miR-878-3p	chrX	66801518	66801539	-	ENSMUSG00000037936	Scarb1	chr5	F
318729	mmu-miR-878-3p	chrX	66801518	66801539	-	ENSMUSG00000041313	Slc7a1	chr5	F
318730	mmu-miR-878-3p	chrX	66801518	66801539	-	ENSMUSG00000058013	Sept11	chr5	F
318731	mmu-miR-878-3p	chrX	66801518	66801539	-	ENSMUSG00000029669	Tspan12	chr6	F
318732	mmu-miR-878-3p	chrX	66801518	66801539	-	ENSMUSG00000030352	Tspan9	chr6	F
318733	mmu-miR-878-3p	chrX	66801518	66801539	-	ENSMUSG00000030747	Dgat2	chr7	F
318734	mmu-miR-878-3p	chrX	66801518	66801539	-	ENSMUSG00000032232	Cgnl1	chr9	F
318735	mmu-miR-878-3p	chrX	66801518	66801539	-	ENSMUSG00000033350	Chst2	chr9	F
318736	mmu-miR-878-3p	chrX	66801518	66801539	-	ENSMUSG00000055653	Gpc3	chrX	F
318737	mmu-miR-878-3p	chrX	66801518	66801539	-	ENSMUSG00000033965	Slc16a2	chrX	F
1357	mmu-miR-877-5p	chr17	35960795	35960814	-	ENSMUSG00000048126	Col6a3	chr1	F
13571	mmu-miR-877-5p	chr17	35960795	35960814	-	ENSMUSG00000026674	Ddr2	chr1	F
13572	mmu-miR-877-5p	chr17	35960795	35960814	-	ENSMUSG00000025931	Paqr8	chr1	F
13573	mmu-miR-877-5p	chr17	35960795	35960814	-	ENSMUSG00000020262	Adarb1	chr10	F
13574	mmu-miR-877-5p	chr17	35960795	35960814	-	ENSMUSG00000020451	Limk2	chr11	F
13575	mmu-miR-877-5p	chr17	35960795	35960814	-	ENSMUSG00000041329	Atp1b2	chr11	F
13576	mmu-miR-877-5p	chr17	35960795	35960814	-	ENSMUSG00000034209	Rasl10a	chr11	F
13577	mmu-miR-877-5p	chr17	35960795	35960814	-	ENSMUSG00000021189	Atxn3	chr12	F
13578	mmu-miR-877-5p	chr17	35960795	35960814	-	ENSMUSG00000020649	Rrm2	chr12	F
13579	mmu-miR-877-5p	chr17	35960795	35960814	-	ENSMUSG00000021076	Actr10	chr12	F
135710	mmu-miR-877-5p	chr17	35960795	35960814	-	ENSMUSG00000033373	Fntb	chr12	F
135711	mmu-miR-877-5p	chr17	35960795	35960814	-	ENSMUSG00000001175	Calm1	chr12	F
135712	mmu-miR-877-5p	chr17	35960795	35960814	-	ENSMUSG00000021258	Ccnk	chr12	F
135713	mmu-miR-877-5p	chr17	35960795	35960814	-	ENSMUSG00000021288	Klc1	chr12	F
135714	mmu-miR-877-5p	chr17	35960795	35960814	-	ENSMUSG00000037697	Ddhd1	chr14	F
135715	mmu-miR-877-5p	chr17	35960795	35960814	-	ENSMUSG00000021895	Arhgef3	chr14	F
135716	mmu-miR-877-5p	chr17	35960795	35960814	-	ENSMUSG00000022358	Fbxo32	chr15	F
135717	mmu-miR-877-5p	chr17	35960795	35960814	-	ENSMUSG00000079018	Ly6c1	chr15	F
135718	mmu-miR-877-5p	chr17	35960795	35960814	-	ENSMUSG00000022456	Sept3	chr15	F
135719	mmu-miR-877-5p	chr17	35960795	35960814	-	ENSMUSG00000039637	Coro7	chr16	F
135720	mmu-miR-877-5p	chr17	35960795	35960814	-	ENSMUSG00000041205	Map6d1	chr16	F
135721	mmu-miR-877-5p	chr17	35960795	35960814	-	ENSMUSG00000061232	H2-K1	chr17	F
135722	mmu-miR-877-5p	chr17	35960795	35960814	-	ENSMUSG00000023067	Cdkn1a	chr17	F
135723	mmu-miR-877-5p	chr17	35960795	35960814	-	ENSMUSG00000024427	Spry4	chr18	F
135724	mmu-miR-877-5p	chr17	35960795	35960814	-	ENSMUSG00000052026	Slc6a7	chr18	F
135725	mmu-miR-877-5p	chr17	35960795	35960814	-	ENSMUSG00000038418	Egr1	chr18	F
135726	mmu-miR-877-5p	chr17	35960795	35960814	-	ENSMUSG00000015090	Ptgds	chr2	F
135727	mmu-miR-877-5p	chr17	35960795	35960814	-	ENSMUSG00000027293	Ehd4	chr2	F
135728	mmu-miR-877-5p	chr17	35960795	35960814	-	ENSMUSG00000004105	Angptl2	chr2	F
135729	mmu-miR-877-5p	chr17	35960795	35960814	-	ENSMUSG00000042851	Zc3h6	chr2	F
135730	mmu-miR-877-5p	chr17	35960795	35960814	-	ENSMUSG00000027737	Slc7a11	chr3	F
135731	mmu-miR-877-5p	chr17	35960795	35960814	-	ENSMUSG00000033910	Gucy1a1	chr3	F
135732	mmu-miR-877-5p	chr17	35960795	35960814	-	ENSMUSG00000053192	Mllt11	chr3	F
135733	mmu-miR-877-5p	chr17	35960795	35960814	-	ENSMUSG00000032826	Ank2	chr3	F
135734	mmu-miR-877-5p	chr17	35960795	35960814	-	ENSMUSG00000049100	Pcdh10	chr3	F
135735	mmu-miR-877-5p	chr17	35960795	35960814	-	ENSMUSG00000028893	Sesn2	chr4	F
135736	mmu-miR-877-5p	chr17	35960795	35960814	-	ENSMUSG00000028211	Trp53inp1	chr4	F
135737	mmu-miR-877-5p	chr17	35960795	35960814	-	ENSMUSG00000028347	Tmeff1	chr4	F
135738	mmu-miR-877-5p	chr17	35960795	35960814	-	ENSMUSG00000028572	Hook1	chr4	F
135739	mmu-miR-877-5p	chr17	35960795	35960814	-	ENSMUSG00000028654	Mycl	chr4	F
135740	mmu-miR-877-5p	chr17	35960795	35960814	-	ENSMUSG00000041313	Slc7a1	chr5	F
135741	mmu-miR-877-5p	chr17	35960795	35960814	-	ENSMUSG00000058013	Sept11	chr5	F
135742	mmu-miR-877-5p	chr17	35960795	35960814	-	ENSMUSG00000061578	Ksr2	chr5	F
135743	mmu-miR-877-5p	chr17	35960795	35960814	-	ENSMUSG00000030276	Ttll3	chr6	F
135744	mmu-miR-877-5p	chr17	35960795	35960814	-	ENSMUSG00000002602	Axl	chr7	F
135745	mmu-miR-877-5p	chr17	35960795	35960814	-	ENSMUSG00000046152	Fut10	chr8	F
135746	mmu-miR-877-5p	chr17	35960795	35960814	-	ENSMUSG00000031337	Mtm1	chrX	F
135747	mmu-miR-877-5p	chr17	35960795	35960814	-	ENSMUSG00000019558	Slc6a8	chrX	F
1358	mmu-miR-877-3p	chr17	35960731	35960752	-	ENSMUSG00000026207	Speg	chr1	F
13581	mmu-miR-877-3p	chr17	35960731	35960752	-	ENSMUSG00000020658	Efr3b	chr12	F
13582	mmu-miR-877-3p	chr17	35960731	35960752	-	ENSMUSG00000021288	Klc1	chr12	F
13583	mmu-miR-877-3p	chr17	35960731	35960752	-	ENSMUSG00000048922	Cdca2	chr14	F
13584	mmu-miR-877-3p	chr17	35960731	35960752	-	ENSMUSG00000043391	2510009E07Rik	chr16	F
13585	mmu-miR-877-3p	chr17	35960731	35960752	-	ENSMUSG00000024325	Ring1	chr17	F
13586	mmu-miR-877-3p	chr17	35960731	35960752	-	ENSMUSG00000039982	Dtx4	chr19	F
13587	mmu-miR-877-3p	chr17	35960731	35960752	-	ENSMUSG00000053617	Sh3pxd2a	chr19	F
13588	mmu-miR-877-3p	chr17	35960731	35960752	-	ENSMUSG00000025314	Ptprj	chr2	F
13589	mmu-miR-877-3p	chr17	35960731	35960752	-	ENSMUSG00000027175	Tcp11l1	chr2	F
135810	mmu-miR-877-3p	chr17	35960731	35960752	-	ENSMUSG00000033910	Gucy1a1	chr3	F
135811	mmu-miR-877-3p	chr17	35960731	35960752	-	ENSMUSG00000028444	Cntfr	chr4	F
135812	mmu-miR-877-3p	chr17	35960731	35960752	-	ENSMUSG00000030352	Tspan9	chr6	F
135813	mmu-miR-877-3p	chr17	35960731	35960752	-	ENSMUSG00000033350	Chst2	chr9	F
2130	mmu-miR-876-5p	chr4	36645422	36645443	-	ENSMUSG00000025931	Paqr8	chr1	F
21301	mmu-miR-876-5p	chr4	36645422	36645443	-	ENSMUSG00000052688	Rab7b	chr1	F
21302	mmu-miR-876-5p	chr4	36645422	36645443	-	ENSMUSG00000063659	Zbtb18	chr1	F
21303	mmu-miR-876-5p	chr4	36645422	36645443	-	ENSMUSG00000020262	Adarb1	chr10	F
21304	mmu-miR-876-5p	chr4	36645422	36645443	-	ENSMUSG00000020451	Limk2	chr11	F
21305	mmu-miR-876-5p	chr4	36645422	36645443	-	ENSMUSG00000021127	Zfp36l1	chr12	F
21306	mmu-miR-876-5p	chr4	36645422	36645443	-	ENSMUSG00000020964	Sel1l	chr12	F
21307	mmu-miR-876-5p	chr4	36645422	36645443	-	ENSMUSG00000054150	Syne3	chr12	F
21308	mmu-miR-876-5p	chr4	36645422	36645443	-	ENSMUSG00000047832	Cdca4	chr12	F
21309	mmu-miR-876-5p	chr4	36645422	36645443	-	ENSMUSG00000035614	Togaram1	chr12	F
213010	mmu-miR-876-5p	chr4	36645422	36645443	-	ENSMUSG00000044147	Arf6	chr12	F
213011	mmu-miR-876-5p	chr4	36645422	36645443	-	ENSMUSG00000037896	Rcor1	chr12	F
213012	mmu-miR-876-5p	chr4	36645422	36645443	-	ENSMUSG00000006356	Crip2	chr12	F
213013	mmu-miR-876-5p	chr4	36645422	36645443	-	ENSMUSG00000021541	Trpc7	chr13	F
213014	mmu-miR-876-5p	chr4	36645422	36645443	-	ENSMUSG00000045312	Lhfpl2	chr13	F
213015	mmu-miR-876-5p	chr4	36645422	36645443	-	ENSMUSG00000056069	Fam105a	chr15	F
213016	mmu-miR-876-5p	chr4	36645422	36645443	-	ENSMUSG00000009739	Pou6f1	chr15	F
213017	mmu-miR-876-5p	chr4	36645422	36645443	-	ENSMUSG00000043391	2510009E07Rik	chr16	F
213018	mmu-miR-876-5p	chr4	36645422	36645443	-	ENSMUSG00000022911	Arl13b	chr16	F
213019	mmu-miR-876-5p	chr4	36645422	36645443	-	ENSMUSG00000046598	Bdh1	chr16	F
213020	mmu-miR-876-5p	chr4	36645422	36645443	-	ENSMUSG00000022836	Mylk	chr16	F
213021	mmu-miR-876-5p	chr4	36645422	36645443	-	ENSMUSG00000022816	Fstl1	chr16	F
213022	mmu-miR-876-5p	chr4	36645422	36645443	-	ENSMUSG00000024085	Man2a1	chr17	F
213023	mmu-miR-876-5p	chr4	36645422	36645443	-	ENSMUSG00000040852	Plekhh2	chr17	F
213024	mmu-miR-876-5p	chr4	36645422	36645443	-	ENSMUSG00000024143	Rhoq	chr17	F
213025	mmu-miR-876-5p	chr4	36645422	36645443	-	ENSMUSG00000042834	Nrep	chr18	F
213026	mmu-miR-876-5p	chr4	36645422	36645443	-	ENSMUSG00000038418	Egr1	chr18	F
213027	mmu-miR-876-5p	chr4	36645422	36645443	-	ENSMUSG00000071847	Apcdd1	chr18	F
213028	mmu-miR-876-5p	chr4	36645422	36645443	-	ENSMUSG00000025314	Ptprj	chr2	F
213029	mmu-miR-876-5p	chr4	36645422	36645443	-	ENSMUSG00000027293	Ehd4	chr2	F
213030	mmu-miR-876-5p	chr4	36645422	36645443	-	ENSMUSG00000033910	Gucy1a1	chr3	F
213031	mmu-miR-876-5p	chr4	36645422	36645443	-	ENSMUSG00000040339	Fam102b	chr3	F
213032	mmu-miR-876-5p	chr4	36645422	36645443	-	ENSMUSG00000028179	Cth	chr3	F
213033	mmu-miR-876-5p	chr4	36645422	36645443	-	ENSMUSG00000058013	Sept11	chr5	F
213034	mmu-miR-876-5p	chr4	36645422	36645443	-	ENSMUSG00000036390	Gadd45a	chr6	F
213035	mmu-miR-876-5p	chr4	36645422	36645443	-	ENSMUSG00000002602	Axl	chr7	F
213036	mmu-miR-876-5p	chr4	36645422	36645443	-	ENSMUSG00000001918	Slc1a5	chr7	F
213037	mmu-miR-876-5p	chr4	36645422	36645443	-	ENSMUSG00000025324	Atp10a	chr7	F
213038	mmu-miR-876-5p	chr4	36645422	36645443	-	ENSMUSG00000049791	Fzd4	chr7	F
213039	mmu-miR-876-5p	chr4	36645422	36645443	-	ENSMUSG00000062184	Hs6st2	chrX	F
213040	mmu-miR-876-5p	chr4	36645422	36645443	-	ENSMUSG00000033965	Slc16a2	chrX	F
213041	mmu-miR-876-5p	chr4	36645422	36645443	-	ENSMUSG00000031337	Mtm1	chrX	F
2131	mmu-miR-876-3p	chr4	36645383	36645404	-	ENSMUSG00000025931	Paqr8	chr1	F
21311	mmu-miR-876-3p	chr4	36645383	36645404	-	ENSMUSG00000026547	Tagln2	chr1	F
21312	mmu-miR-876-3p	chr4	36645383	36645404	-	ENSMUSG00000069670	Nkain2	chr10	F
21313	mmu-miR-876-3p	chr4	36645383	36645404	-	ENSMUSG00000020256	Aldh1l2	chr10	F
21314	mmu-miR-876-3p	chr4	36645383	36645404	-	ENSMUSG00000020181	Nav3	chr10	F
21315	mmu-miR-876-3p	chr4	36645383	36645404	-	ENSMUSG00000039485	Tspyl4	chr10	F
21316	mmu-miR-876-3p	chr4	36645383	36645404	-	ENSMUSG00000061666	Gdpd1	chr11	F
21317	mmu-miR-876-3p	chr4	36645383	36645404	-	ENSMUSG00000020658	Efr3b	chr12	F
21318	mmu-miR-876-3p	chr4	36645383	36645404	-	ENSMUSG00000021236	Entpd5	chr12	F
21319	mmu-miR-876-3p	chr4	36645383	36645404	-	ENSMUSG00000020964	Sel1l	chr12	F
213110	mmu-miR-876-3p	chr4	36645383	36645404	-	ENSMUSG00000054150	Syne3	chr12	F
213111	mmu-miR-876-3p	chr4	36645383	36645404	-	ENSMUSG00000084883	Ccdc85c	chr12	F
213112	mmu-miR-876-3p	chr4	36645383	36645404	-	ENSMUSG00000021276	Cinp	chr12	F
213113	mmu-miR-876-3p	chr4	36645383	36645404	-	ENSMUSG00000021279	Cdc42bpb	chr12	F
213114	mmu-miR-876-3p	chr4	36645383	36645404	-	ENSMUSG00000020668	Kif3c	chr12	F
213115	mmu-miR-876-3p	chr4	36645383	36645404	-	ENSMUSG00000033373	Fntb	chr12	F
213116	mmu-miR-876-3p	chr4	36645383	36645404	-	ENSMUSG00000021277	Traf3	chr12	F
213117	mmu-miR-876-3p	chr4	36645383	36645404	-	ENSMUSG00000021281	Tnfaip2	chr12	F
213118	mmu-miR-876-3p	chr4	36645383	36645404	-	ENSMUSG00000072825	Cep170b	chr12	F
213119	mmu-miR-876-3p	chr4	36645383	36645404	-	ENSMUSG00000021390	Ogn	chr13	F
213120	mmu-miR-876-3p	chr4	36645383	36645404	-	ENSMUSG00000045312	Lhfpl2	chr13	F
213121	mmu-miR-876-3p	chr4	36645383	36645404	-	ENSMUSG00000022034	Esco2	chr14	F
213122	mmu-miR-876-3p	chr4	36645383	36645404	-	ENSMUSG00000048922	Cdca2	chr14	F
213123	mmu-miR-876-3p	chr4	36645383	36645404	-	ENSMUSG00000025277	Abhd6	chr14	F
213124	mmu-miR-876-3p	chr4	36645383	36645404	-	ENSMUSG00000021822	Plau	chr14	F
213125	mmu-miR-876-3p	chr4	36645383	36645404	-	ENSMUSG00000022425	Enpp2	chr15	F
213126	mmu-miR-876-3p	chr4	36645383	36645404	-	ENSMUSG00000079018	Ly6c1	chr15	F
213127	mmu-miR-876-3p	chr4	36645383	36645404	-	ENSMUSG00000009739	Pou6f1	chr15	F
213128	mmu-miR-876-3p	chr4	36645383	36645404	-	ENSMUSG00000022456	Sept3	chr15	F
213129	mmu-miR-876-3p	chr4	36645383	36645404	-	ENSMUSG00000002489	Tiam1	chr16	F
213130	mmu-miR-876-3p	chr4	36645383	36645404	-	ENSMUSG00000022816	Fstl1	chr16	F
213131	mmu-miR-876-3p	chr4	36645383	36645404	-	ENSMUSG00000024085	Man2a1	chr17	F
213132	mmu-miR-876-3p	chr4	36645383	36645404	-	ENSMUSG00000046324	Ermp1	chr19	F
213133	mmu-miR-876-3p	chr4	36645383	36645404	-	ENSMUSG00000017412	Cacnb4	chr2	F
213134	mmu-miR-876-3p	chr4	36645383	36645404	-	ENSMUSG00000005087	Cd44	chr2	F
213135	mmu-miR-876-3p	chr4	36645383	36645404	-	ENSMUSG00000026858	Miga2	chr2	F
213136	mmu-miR-876-3p	chr4	36645383	36645404	-	ENSMUSG00000027737	Slc7a11	chr3	F
213137	mmu-miR-876-3p	chr4	36645383	36645404	-	ENSMUSG00000032826	Ank2	chr3	F
213138	mmu-miR-876-3p	chr4	36645383	36645404	-	ENSMUSG00000039158	Akna	chr4	F
213139	mmu-miR-876-3p	chr4	36645383	36645404	-	ENSMUSG00000040964	Arhgef10l	chr4	F
213140	mmu-miR-876-3p	chr4	36645383	36645404	-	ENSMUSG00000028542	Slc6a9	chr4	F
213141	mmu-miR-876-3p	chr4	36645383	36645404	-	ENSMUSG00000073700	Klhl21	chr4	F
213142	mmu-miR-876-3p	chr4	36645383	36645404	-	ENSMUSG00000037936	Scarb1	chr5	F
213143	mmu-miR-876-3p	chr4	36645383	36645404	-	ENSMUSG00000058013	Sept11	chr5	F
213144	mmu-miR-876-3p	chr4	36645383	36645404	-	ENSMUSG00000029669	Tspan12	chr6	F
213145	mmu-miR-876-3p	chr4	36645383	36645404	-	ENSMUSG00000030352	Tspan9	chr6	F
213146	mmu-miR-876-3p	chr4	36645383	36645404	-	ENSMUSG00000002602	Axl	chr7	F
213147	mmu-miR-876-3p	chr4	36645383	36645404	-	ENSMUSG00000030761	Myo7a	chr7	F
213148	mmu-miR-876-3p	chr4	36645383	36645404	-	ENSMUSG00000046027	Stard5	chr7	F
213149	mmu-miR-876-3p	chr4	36645383	36645404	-	ENSMUSG00000048078	Tenm4	chr7	F
213150	mmu-miR-876-3p	chr4	36645383	36645404	-	ENSMUSG00000040010	Slc7a5	chr8	F
213151	mmu-miR-876-3p	chr4	36645383	36645404	-	ENSMUSG00000032320	Rcn2	chr9	F
213152	mmu-miR-876-3p	chr4	36645383	36645404	-	ENSMUSG00000032348	Gsta4	chr9	F
213153	mmu-miR-876-3p	chr4	36645383	36645404	-	ENSMUSG00000032549	Rab6b	chr9	F
1042	mmu-miR-875-5p	chr15	35661016	35661037	-	ENSMUSG00000025931	Paqr8	chr1	F
10421	mmu-miR-875-5p	chr15	35661016	35661037	-	ENSMUSG00000020262	Adarb1	chr10	F
10422	mmu-miR-875-5p	chr15	35661016	35661037	-	ENSMUSG00000041329	Atp1b2	chr11	F
10423	mmu-miR-875-5p	chr15	35661016	35661037	-	ENSMUSG00000041341	Atg2b	chr12	F
10424	mmu-miR-875-5p	chr15	35661016	35661037	-	ENSMUSG00000056770	Setd3	chr12	F
10425	mmu-miR-875-5p	chr15	35661016	35661037	-	ENSMUSG00000021276	Cinp	chr12	F
10426	mmu-miR-875-5p	chr15	35661016	35661037	-	ENSMUSG00000021109	Hif1a	chr12	F
10427	mmu-miR-875-5p	chr15	35661016	35661037	-	ENSMUSG00000001175	Calm1	chr12	F
10428	mmu-miR-875-5p	chr15	35661016	35661037	-	ENSMUSG00000037896	Rcor1	chr12	F
10429	mmu-miR-875-5p	chr15	35661016	35661037	-	ENSMUSG00000072825	Cep170b	chr12	F
104210	mmu-miR-875-5p	chr15	35661016	35661037	-	ENSMUSG00000021822	Plau	chr14	F
104211	mmu-miR-875-5p	chr15	35661016	35661037	-	ENSMUSG00000021895	Arhgef3	chr14	F
104212	mmu-miR-875-5p	chr15	35661016	35661037	-	ENSMUSG00000022456	Sept3	chr15	F
104213	mmu-miR-875-5p	chr15	35661016	35661037	-	ENSMUSG00000042834	Nrep	chr18	F
104214	mmu-miR-875-5p	chr15	35661016	35661037	-	ENSMUSG00000038418	Egr1	chr18	F
104215	mmu-miR-875-5p	chr15	35661016	35661037	-	ENSMUSG00000039982	Dtx4	chr19	F
104216	mmu-miR-875-5p	chr15	35661016	35661037	-	ENSMUSG00000046324	Ermp1	chr19	F
104217	mmu-miR-875-5p	chr15	35661016	35661037	-	ENSMUSG00000035778	Ggta1	chr2	F
104218	mmu-miR-875-5p	chr15	35661016	35661037	-	ENSMUSG00000005087	Cd44	chr2	F
104219	mmu-miR-875-5p	chr15	35661016	35661037	-	ENSMUSG00000027122	Arl14ep	chr2	F
104220	mmu-miR-875-5p	chr15	35661016	35661037	-	ENSMUSG00000027293	Ehd4	chr2	F
104221	mmu-miR-875-5p	chr15	35661016	35661037	-	ENSMUSG00000042851	Zc3h6	chr2	F
104222	mmu-miR-875-5p	chr15	35661016	35661037	-	ENSMUSG00000032826	Ank2	chr3	F
104223	mmu-miR-875-5p	chr15	35661016	35661037	-	ENSMUSG00000028211	Trp53inp1	chr4	F
104224	mmu-miR-875-5p	chr15	35661016	35661037	-	ENSMUSG00000039987	Phtf2	chr5	F
104225	mmu-miR-875-5p	chr15	35661016	35661037	-	ENSMUSG00000037936	Scarb1	chr5	F
104226	mmu-miR-875-5p	chr15	35661016	35661037	-	ENSMUSG00000041313	Slc7a1	chr5	F
104227	mmu-miR-875-5p	chr15	35661016	35661037	-	ENSMUSG00000058013	Sept11	chr5	F
104228	mmu-miR-875-5p	chr15	35661016	35661037	-	ENSMUSG00000006651	Aplp1	chr7	F
104229	mmu-miR-875-5p	chr15	35661016	35661037	-	ENSMUSG00000032348	Gsta4	chr9	F
867	mmu-miR-874-3p	chr13	58023135	58023156	-	ENSMUSG00000026628	Atf3	chr1	F
8671	mmu-miR-874-3p	chr13	58023135	58023156	-	ENSMUSG00000039323	Igfbp2	chr1	F
8672	mmu-miR-874-3p	chr13	58023135	58023156	-	ENSMUSG00000026456	Cyb5r1	chr1	F
8673	mmu-miR-874-3p	chr13	58023135	58023156	-	ENSMUSG00000020262	Adarb1	chr10	F
8674	mmu-miR-874-3p	chr13	58023135	58023156	-	ENSMUSG00000020256	Aldh1l2	chr10	F
8675	mmu-miR-874-3p	chr13	58023135	58023156	-	ENSMUSG00000025403	Shmt2	chr10	F
8676	mmu-miR-874-3p	chr13	58023135	58023156	-	ENSMUSG00000061666	Gdpd1	chr11	F
8677	mmu-miR-874-3p	chr13	58023135	58023156	-	ENSMUSG00000021276	Cinp	chr12	F
8678	mmu-miR-874-3p	chr13	58023135	58023156	-	ENSMUSG00000021277	Traf3	chr12	F
8679	mmu-miR-874-3p	chr13	58023135	58023156	-	ENSMUSG00000045312	Lhfpl2	chr13	F
86710	mmu-miR-874-3p	chr13	58023135	58023156	-	ENSMUSG00000021831	Ero1l	chr14	F
86711	mmu-miR-874-3p	chr13	58023135	58023156	-	ENSMUSG00000056069	Fam105a	chr15	F
86712	mmu-miR-874-3p	chr13	58023135	58023156	-	ENSMUSG00000009739	Pou6f1	chr15	F
86713	mmu-miR-874-3p	chr13	58023135	58023156	-	ENSMUSG00000022456	Sept3	chr15	F
86714	mmu-miR-874-3p	chr13	58023135	58023156	-	ENSMUSG00000043391	2510009E07Rik	chr16	F
86715	mmu-miR-874-3p	chr13	58023135	58023156	-	ENSMUSG00000022816	Fstl1	chr16	F
86716	mmu-miR-874-3p	chr13	58023135	58023156	-	ENSMUSG00000023883	Phf10	chr17	F
86717	mmu-miR-874-3p	chr13	58023135	58023156	-	ENSMUSG00000024039	Cbs	chr17	F
86718	mmu-miR-874-3p	chr13	58023135	58023156	-	ENSMUSG00000033597	Caskin1	chr17	F
86719	mmu-miR-874-3p	chr13	58023135	58023156	-	ENSMUSG00000042834	Nrep	chr18	F
86720	mmu-miR-874-3p	chr13	58023135	58023156	-	ENSMUSG00000052026	Slc6a7	chr18	F
86721	mmu-miR-874-3p	chr13	58023135	58023156	-	ENSMUSG00000024640	Psat1	chr19	F
86722	mmu-miR-874-3p	chr13	58023135	58023156	-	ENSMUSG00000017412	Cacnb4	chr2	F
86723	mmu-miR-874-3p	chr13	58023135	58023156	-	ENSMUSG00000005087	Cd44	chr2	F
86724	mmu-miR-874-3p	chr13	58023135	58023156	-	ENSMUSG00000027293	Ehd4	chr2	F
86725	mmu-miR-874-3p	chr13	58023135	58023156	-	ENSMUSG00000027313	Chac1	chr2	F
86726	mmu-miR-874-3p	chr13	58023135	58023156	-	ENSMUSG00000027947	Il6ra	chr3	F
86727	mmu-miR-874-3p	chr13	58023135	58023156	-	ENSMUSG00000040339	Fam102b	chr3	F
86728	mmu-miR-874-3p	chr13	58023135	58023156	-	ENSMUSG00000032826	Ank2	chr3	F
86729	mmu-miR-874-3p	chr13	58023135	58023156	-	ENSMUSG00000028034	Fubp1	chr3	F
86730	mmu-miR-874-3p	chr13	58023135	58023156	-	ENSMUSG00000028893	Sesn2	chr4	F
86731	mmu-miR-874-3p	chr13	58023135	58023156	-	ENSMUSG00000050212	Eva1b	chr4	F
86732	mmu-miR-874-3p	chr13	58023135	58023156	-	ENSMUSG00000073700	Klhl21	chr4	F
86733	mmu-miR-874-3p	chr13	58023135	58023156	-	ENSMUSG00000039987	Phtf2	chr5	F
86734	mmu-miR-874-3p	chr13	58023135	58023156	-	ENSMUSG00000041313	Slc7a1	chr5	F
86735	mmu-miR-874-3p	chr13	58023135	58023156	-	ENSMUSG00000029381	Shroom3	chr5	F
86736	mmu-miR-874-3p	chr13	58023135	58023156	-	ENSMUSG00000030352	Tspan9	chr6	F
86737	mmu-miR-874-3p	chr13	58023135	58023156	-	ENSMUSG00000039062	Anpep	chr7	F
86738	mmu-miR-874-3p	chr13	58023135	58023156	-	ENSMUSG00000002885	Adgre5	chr8	F
86739	mmu-miR-874-3p	chr13	58023135	58023156	-	ENSMUSG00000040010	Slc7a5	chr8	F
86740	mmu-miR-874-3p	chr13	58023135	58023156	-	ENSMUSG00000001995	Sipa1l2	chr8	F
86741	mmu-miR-874-3p	chr13	58023135	58023156	-	ENSMUSG00000032232	Cgnl1	chr9	F
86742	mmu-miR-874-3p	chr13	58023135	58023156	-	ENSMUSG00000032549	Rab6b	chr9	F
86743	mmu-miR-874-3p	chr13	58023135	58023156	-	ENSMUSG00000031202	Rab39b	chrX	F
2135	mmu-miR-873a-5p	chr4	36668556	36668576	-	ENSMUSG00000026674	Ddr2	chr1	F
21351	mmu-miR-873a-5p	chr4	36668556	36668576	-	ENSMUSG00000025931	Paqr8	chr1	F
21352	mmu-miR-873a-5p	chr4	36668556	36668576	-	ENSMUSG00000052688	Rab7b	chr1	F
21353	mmu-miR-873a-5p	chr4	36668556	36668576	-	ENSMUSG00000026547	Tagln2	chr1	F
21354	mmu-miR-873a-5p	chr4	36668556	36668576	-	ENSMUSG00000063659	Zbtb18	chr1	F
21355	mmu-miR-873a-5p	chr4	36668556	36668576	-	ENSMUSG00000071359	Tbpl1	chr10	F
21356	mmu-miR-873a-5p	chr4	36668556	36668576	-	ENSMUSG00000020262	Adarb1	chr10	F
21357	mmu-miR-873a-5p	chr4	36668556	36668576	-	ENSMUSG00000025403	Shmt2	chr10	F
21358	mmu-miR-873a-5p	chr4	36668556	36668576	-	ENSMUSG00000025357	Dgka	chr10	F
21359	mmu-miR-873a-5p	chr4	36668556	36668576	-	ENSMUSG00000039485	Tspyl4	chr10	F
213510	mmu-miR-873a-5p	chr4	36668556	36668576	-	ENSMUSG00000034881	Tbxa2r	chr10	F
213511	mmu-miR-873a-5p	chr4	36668556	36668576	-	ENSMUSG00000020451	Limk2	chr11	F
213512	mmu-miR-873a-5p	chr4	36668556	36668576	-	ENSMUSG00000020142	Slc1a4	chr11	F
213513	mmu-miR-873a-5p	chr4	36668556	36668576	-	ENSMUSG00000041329	Atp1b2	chr11	F
213514	mmu-miR-873a-5p	chr4	36668556	36668576	-	ENSMUSG00000020658	Efr3b	chr12	F
213515	mmu-miR-873a-5p	chr4	36668556	36668576	-	ENSMUSG00000002997	Prkar2b	chr12	F
213516	mmu-miR-873a-5p	chr4	36668556	36668576	-	ENSMUSG00000021054	Sgpp1	chr12	F
213517	mmu-miR-873a-5p	chr4	36668556	36668576	-	ENSMUSG00000059436	Max	chr12	F
213518	mmu-miR-873a-5p	chr4	36668556	36668576	-	ENSMUSG00000021127	Zfp36l1	chr12	F
213519	mmu-miR-873a-5p	chr4	36668556	36668576	-	ENSMUSG00000020964	Sel1l	chr12	F
213520	mmu-miR-873a-5p	chr4	36668556	36668576	-	ENSMUSG00000021189	Atxn3	chr12	F
213521	mmu-miR-873a-5p	chr4	36668556	36668576	-	ENSMUSG00000021279	Cdc42bpb	chr12	F
213522	mmu-miR-873a-5p	chr4	36668556	36668576	-	ENSMUSG00000020649	Rrm2	chr12	F
213523	mmu-miR-873a-5p	chr4	36668556	36668576	-	ENSMUSG00000035597	Prpf39	chr12	F
213524	mmu-miR-873a-5p	chr4	36668556	36668576	-	ENSMUSG00000001175	Calm1	chr12	F
213525	mmu-miR-873a-5p	chr4	36668556	36668576	-	ENSMUSG00000021258	Ccnk	chr12	F
213526	mmu-miR-873a-5p	chr4	36668556	36668576	-	ENSMUSG00000017843	Ppp2r5c	chr12	F
213527	mmu-miR-873a-5p	chr4	36668556	36668576	-	ENSMUSG00000037896	Rcor1	chr12	F
213528	mmu-miR-873a-5p	chr4	36668556	36668576	-	ENSMUSG00000021281	Tnfaip2	chr12	F
213529	mmu-miR-873a-5p	chr4	36668556	36668576	-	ENSMUSG00000021288	Klc1	chr12	F
213530	mmu-miR-873a-5p	chr4	36668556	36668576	-	ENSMUSG00000006356	Crip2	chr12	F
213531	mmu-miR-873a-5p	chr4	36668556	36668576	-	ENSMUSG00000037466	Tedc1	chr12	F
213532	mmu-miR-873a-5p	chr4	36668556	36668576	-	ENSMUSG00000045312	Lhfpl2	chr13	F
213533	mmu-miR-873a-5p	chr4	36668556	36668576	-	ENSMUSG00000021831	Ero1l	chr14	F
213534	mmu-miR-873a-5p	chr4	36668556	36668576	-	ENSMUSG00000037697	Ddhd1	chr14	F
213535	mmu-miR-873a-5p	chr4	36668556	36668576	-	ENSMUSG00000048922	Cdca2	chr14	F
213536	mmu-miR-873a-5p	chr4	36668556	36668576	-	ENSMUSG00000003469	Phyhip	chr14	F
213537	mmu-miR-873a-5p	chr4	36668556	36668576	-	ENSMUSG00000022024	Sugt1	chr14	F
213538	mmu-miR-873a-5p	chr4	36668556	36668576	-	ENSMUSG00000022358	Fbxo32	chr15	F
213539	mmu-miR-873a-5p	chr4	36668556	36668576	-	ENSMUSG00000079018	Ly6c1	chr15	F
213540	mmu-miR-873a-5p	chr4	36668556	36668576	-	ENSMUSG00000009739	Pou6f1	chr15	F
213541	mmu-miR-873a-5p	chr4	36668556	36668576	-	ENSMUSG00000022587	Ly6e	chr15	F
213542	mmu-miR-873a-5p	chr4	36668556	36668576	-	ENSMUSG00000022416	Cacna1i	chr15	F
213543	mmu-miR-873a-5p	chr4	36668556	36668576	-	ENSMUSG00000022456	Sept3	chr15	F
213544	mmu-miR-873a-5p	chr4	36668556	36668576	-	ENSMUSG00000022911	Arl13b	chr16	F
213545	mmu-miR-873a-5p	chr4	36668556	36668576	-	ENSMUSG00000022514	Il1rap	chr16	F
213546	mmu-miR-873a-5p	chr4	36668556	36668576	-	ENSMUSG00000022816	Fstl1	chr16	F
213547	mmu-miR-873a-5p	chr4	36668556	36668576	-	ENSMUSG00000047407	Tgif1	chr17	F
213548	mmu-miR-873a-5p	chr4	36668556	36668576	-	ENSMUSG00000033597	Caskin1	chr17	F
213549	mmu-miR-873a-5p	chr4	36668556	36668576	-	ENSMUSG00000023952	Gtpbp2	chr17	F
213550	mmu-miR-873a-5p	chr4	36668556	36668576	-	ENSMUSG00000024085	Man2a1	chr17	F
213551	mmu-miR-873a-5p	chr4	36668556	36668576	-	ENSMUSG00000040852	Plekhh2	chr17	F
213552	mmu-miR-873a-5p	chr4	36668556	36668576	-	ENSMUSG00000024143	Rhoq	chr17	F
213553	mmu-miR-873a-5p	chr4	36668556	36668576	-	ENSMUSG00000042834	Nrep	chr18	F
213554	mmu-miR-873a-5p	chr4	36668556	36668576	-	ENSMUSG00000024427	Spry4	chr18	F
213555	mmu-miR-873a-5p	chr4	36668556	36668576	-	ENSMUSG00000024640	Psat1	chr19	F
213556	mmu-miR-873a-5p	chr4	36668556	36668576	-	ENSMUSG00000046324	Ermp1	chr19	F
213557	mmu-miR-873a-5p	chr4	36668556	36668576	-	ENSMUSG00000053617	Sh3pxd2a	chr19	F
213558	mmu-miR-873a-5p	chr4	36668556	36668576	-	ENSMUSG00000046805	Mpeg1	chr19	F
213559	mmu-miR-873a-5p	chr4	36668556	36668576	-	ENSMUSG00000024817	Uhrf2	chr19	F
213560	mmu-miR-873a-5p	chr4	36668556	36668576	-	ENSMUSG00000035778	Ggta1	chr2	F
213561	mmu-miR-873a-5p	chr4	36668556	36668576	-	ENSMUSG00000017412	Cacnb4	chr2	F
213562	mmu-miR-873a-5p	chr4	36668556	36668576	-	ENSMUSG00000005087	Cd44	chr2	F
213563	mmu-miR-873a-5p	chr4	36668556	36668576	-	ENSMUSG00000027293	Ehd4	chr2	F
213564	mmu-miR-873a-5p	chr4	36668556	36668576	-	ENSMUSG00000032715	Trib3	chr2	F
213565	mmu-miR-873a-5p	chr4	36668556	36668576	-	ENSMUSG00000004105	Angptl2	chr2	F
213566	mmu-miR-873a-5p	chr4	36668556	36668576	-	ENSMUSG00000026749	Nek6	chr2	F
213567	mmu-miR-873a-5p	chr4	36668556	36668576	-	ENSMUSG00000027313	Chac1	chr2	F
213568	mmu-miR-873a-5p	chr4	36668556	36668576	-	ENSMUSG00000056501	Cebpb	chr2	F
213569	mmu-miR-873a-5p	chr4	36668556	36668576	-	ENSMUSG00000027947	Il6ra	chr3	F
213570	mmu-miR-873a-5p	chr4	36668556	36668576	-	ENSMUSG00000053192	Mllt11	chr3	F
213571	mmu-miR-873a-5p	chr4	36668556	36668576	-	ENSMUSG00000053931	Cnn3	chr3	F
213572	mmu-miR-873a-5p	chr4	36668556	36668576	-	ENSMUSG00000028034	Fubp1	chr3	F
213573	mmu-miR-873a-5p	chr4	36668556	36668576	-	ENSMUSG00000028893	Sesn2	chr4	F
213574	mmu-miR-873a-5p	chr4	36668556	36668576	-	ENSMUSG00000028211	Trp53inp1	chr4	F
213575	mmu-miR-873a-5p	chr4	36668556	36668576	-	ENSMUSG00000028542	Slc6a9	chr4	F
213576	mmu-miR-873a-5p	chr4	36668556	36668576	-	ENSMUSG00000028654	Mycl	chr4	F
213577	mmu-miR-873a-5p	chr4	36668556	36668576	-	ENSMUSG00000028919	Arhgef19	chr4	F
213578	mmu-miR-873a-5p	chr4	36668556	36668576	-	ENSMUSG00000039474	Wfs1	chr5	F
213579	mmu-miR-873a-5p	chr4	36668556	36668576	-	ENSMUSG00000041313	Slc7a1	chr5	F
213580	mmu-miR-873a-5p	chr4	36668556	36668576	-	ENSMUSG00000054920	Klhl5	chr5	F
213581	mmu-miR-873a-5p	chr4	36668556	36668576	-	ENSMUSG00000029304	Spp1	chr5	F
213582	mmu-miR-873a-5p	chr4	36668556	36668576	-	ENSMUSG00000051950	B3glct	chr5	F
213583	mmu-miR-873a-5p	chr4	36668556	36668576	-	ENSMUSG00000005667	Mthfd2	chr6	F
213584	mmu-miR-873a-5p	chr4	36668556	36668576	-	ENSMUSG00000030352	Tspan9	chr6	F
213585	mmu-miR-873a-5p	chr4	36668556	36668576	-	ENSMUSG00000048078	Tenm4	chr7	F
213586	mmu-miR-873a-5p	chr4	36668556	36668576	-	ENSMUSG00000002885	Adgre5	chr8	F
213587	mmu-miR-873a-5p	chr4	36668556	36668576	-	ENSMUSG00000031654	Cbln1	chr8	F
213588	mmu-miR-873a-5p	chr4	36668556	36668576	-	ENSMUSG00000014846	Tppp3	chr8	F
213589	mmu-miR-873a-5p	chr4	36668556	36668576	-	ENSMUSG00000040010	Slc7a5	chr8	F
213590	mmu-miR-873a-5p	chr4	36668556	36668576	-	ENSMUSG00000031770	Herpud1	chr8	F
213591	mmu-miR-873a-5p	chr4	36668556	36668576	-	ENSMUSG00000032232	Cgnl1	chr9	F
213592	mmu-miR-873a-5p	chr4	36668556	36668576	-	ENSMUSG00000032549	Rab6b	chr9	F
213593	mmu-miR-873a-5p	chr4	36668556	36668576	-	ENSMUSG00000019558	Slc6a8	chrX	F
213594	mmu-miR-873a-5p	chr4	36668556	36668576	-	ENSMUSG00000031327	Chic1	chrX	F
2136	mmu-miR-873a-3p	chr4	36668520	36668540	-	ENSMUSG00000026034	Clk1	chr1	F
21361	mmu-miR-873a-3p	chr4	36668520	36668540	-	ENSMUSG00000034801	Sos2	chr12	F
21362	mmu-miR-873a-3p	chr4	36668520	36668540	-	ENSMUSG00000015143	Actn1	chr12	F
21363	mmu-miR-873a-3p	chr4	36668520	36668540	-	ENSMUSG00000020964	Sel1l	chr12	F
21364	mmu-miR-873a-3p	chr4	36668520	36668540	-	ENSMUSG00000021189	Atxn3	chr12	F
21365	mmu-miR-873a-3p	chr4	36668520	36668540	-	ENSMUSG00000021895	Arhgef3	chr14	F
21366	mmu-miR-873a-3p	chr4	36668520	36668540	-	ENSMUSG00000002489	Tiam1	chr16	F
21367	mmu-miR-873a-3p	chr4	36668520	36668540	-	ENSMUSG00000022514	Il1rap	chr16	F
21368	mmu-miR-873a-3p	chr4	36668520	36668540	-	ENSMUSG00000028654	Mycl	chr4	F
21369	mmu-miR-873a-3p	chr4	36668520	36668540	-	ENSMUSG00000039782	Cpeb2	chr5	F
213610	mmu-miR-873a-3p	chr4	36668520	36668540	-	ENSMUSG00000031327	Chic1	chrX	F
2168	mmu-miR-872-5p	chr4	94665167	94665187	+	ENSMUSG00000026674	Ddr2	chr1	F
21681	mmu-miR-872-5p	chr4	94665167	94665187	+	ENSMUSG00000025931	Paqr8	chr1	F
21682	mmu-miR-872-5p	chr4	94665167	94665187	+	ENSMUSG00000025403	Shmt2	chr10	F
21683	mmu-miR-872-5p	chr4	94665167	94665187	+	ENSMUSG00000034201	Gas2l1	chr11	F
21684	mmu-miR-872-5p	chr4	94665167	94665187	+	ENSMUSG00000047832	Cdca4	chr12	F
21685	mmu-miR-872-5p	chr4	94665167	94665187	+	ENSMUSG00000020668	Kif3c	chr12	F
21686	mmu-miR-872-5p	chr4	94665167	94665187	+	ENSMUSG00000021226	Acot2	chr12	F
21687	mmu-miR-872-5p	chr4	94665167	94665187	+	ENSMUSG00000007411	Mark3	chr12	F
21688	mmu-miR-872-5p	chr4	94665167	94665187	+	ENSMUSG00000003469	Phyhip	chr14	F
21689	mmu-miR-872-5p	chr4	94665167	94665187	+	ENSMUSG00000009739	Pou6f1	chr15	F
216810	mmu-miR-872-5p	chr4	94665167	94665187	+	ENSMUSG00000022346	Myc	chr15	F
216811	mmu-miR-872-5p	chr4	94665167	94665187	+	ENSMUSG00000022587	Ly6e	chr15	F
216812	mmu-miR-872-5p	chr4	94665167	94665187	+	ENSMUSG00000022416	Cacna1i	chr15	F
216813	mmu-miR-872-5p	chr4	94665167	94665187	+	ENSMUSG00000043391	2510009E07Rik	chr16	F
216814	mmu-miR-872-5p	chr4	94665167	94665187	+	ENSMUSG00000061232	H2-K1	chr17	F
216815	mmu-miR-872-5p	chr4	94665167	94665187	+	ENSMUSG00000024085	Man2a1	chr17	F
216816	mmu-miR-872-5p	chr4	94665167	94665187	+	ENSMUSG00000038418	Egr1	chr18	F
216817	mmu-miR-872-5p	chr4	94665167	94665187	+	ENSMUSG00000046805	Mpeg1	chr19	F
216818	mmu-miR-872-5p	chr4	94665167	94665187	+	ENSMUSG00000005087	Cd44	chr2	F
216819	mmu-miR-872-5p	chr4	94665167	94665187	+	ENSMUSG00000004105	Angptl2	chr2	F
216820	mmu-miR-872-5p	chr4	94665167	94665187	+	ENSMUSG00000032826	Ank2	chr3	F
216821	mmu-miR-872-5p	chr4	94665167	94665187	+	ENSMUSG00000028179	Cth	chr3	F
216822	mmu-miR-872-5p	chr4	94665167	94665187	+	ENSMUSG00000028034	Fubp1	chr3	F
216823	mmu-miR-872-5p	chr4	94665167	94665187	+	ENSMUSG00000028654	Mycl	chr4	F
216824	mmu-miR-872-5p	chr4	94665167	94665187	+	ENSMUSG00000058013	Sept11	chr5	F
216825	mmu-miR-872-5p	chr4	94665167	94665187	+	ENSMUSG00000030847	Bag3	chr7	F
216826	mmu-miR-872-5p	chr4	94665167	94665187	+	ENSMUSG00000002885	Adgre5	chr8	F
216827	mmu-miR-872-5p	chr4	94665167	94665187	+	ENSMUSG00000046152	Fut10	chr8	F
216828	mmu-miR-872-5p	chr4	94665167	94665187	+	ENSMUSG00000032549	Rab6b	chr9	F
3192	mmu-miR-871-5p	chrX	66810472	66810494	-	ENSMUSG00000038235	F11r	chr1	F
31921	mmu-miR-871-5p	chrX	66810472	66810494	-	ENSMUSG00000063659	Zbtb18	chr1	F
31922	mmu-miR-871-5p	chrX	66810472	66810494	-	ENSMUSG00000071359	Tbpl1	chr10	F
31923	mmu-miR-871-5p	chrX	66810472	66810494	-	ENSMUSG00000020262	Adarb1	chr10	F
31924	mmu-miR-871-5p	chrX	66810472	66810494	-	ENSMUSG00000020948	Klhl28	chr12	F
31925	mmu-miR-871-5p	chrX	66810472	66810494	-	ENSMUSG00000021054	Sgpp1	chr12	F
31926	mmu-miR-871-5p	chrX	66810472	66810494	-	ENSMUSG00000059436	Max	chr12	F
31927	mmu-miR-871-5p	chrX	66810472	66810494	-	ENSMUSG00000061533	Cep128	chr12	F
31928	mmu-miR-871-5p	chrX	66810472	66810494	-	ENSMUSG00000020964	Sel1l	chr12	F
31929	mmu-miR-871-5p	chrX	66810472	66810494	-	ENSMUSG00000021276	Cinp	chr12	F
319210	mmu-miR-871-5p	chrX	66810472	66810494	-	ENSMUSG00000035954	Dock4	chr12	F
319211	mmu-miR-871-5p	chrX	66810472	66810494	-	ENSMUSG00000021226	Acot2	chr12	F
319212	mmu-miR-871-5p	chrX	66810472	66810494	-	ENSMUSG00000001175	Calm1	chr12	F
319213	mmu-miR-871-5p	chrX	66810472	66810494	-	ENSMUSG00000021275	Tecpr2	chr12	F
319214	mmu-miR-871-5p	chrX	66810472	66810494	-	ENSMUSG00000007411	Mark3	chr12	F
319215	mmu-miR-871-5p	chrX	66810472	66810494	-	ENSMUSG00000038732	Mboat1	chr13	F
319216	mmu-miR-871-5p	chrX	66810472	66810494	-	ENSMUSG00000021390	Ogn	chr13	F
319217	mmu-miR-871-5p	chrX	66810472	66810494	-	ENSMUSG00000045312	Lhfpl2	chr13	F
319218	mmu-miR-871-5p	chrX	66810472	66810494	-	ENSMUSG00000022034	Esco2	chr14	F
319219	mmu-miR-871-5p	chrX	66810472	66810494	-	ENSMUSG00000021895	Arhgef3	chr14	F
319220	mmu-miR-871-5p	chrX	66810472	66810494	-	ENSMUSG00000025545	Clybl	chr14	F
319221	mmu-miR-871-5p	chrX	66810472	66810494	-	ENSMUSG00000022425	Enpp2	chr15	F
319222	mmu-miR-871-5p	chrX	66810472	66810494	-	ENSMUSG00000022353	Mtss1	chr15	F
319223	mmu-miR-871-5p	chrX	66810472	66810494	-	ENSMUSG00000023067	Cdkn1a	chr17	F
319224	mmu-miR-871-5p	chrX	66810472	66810494	-	ENSMUSG00000024427	Spry4	chr18	F
319225	mmu-miR-871-5p	chrX	66810472	66810494	-	ENSMUSG00000046324	Ermp1	chr19	F
319226	mmu-miR-871-5p	chrX	66810472	66810494	-	ENSMUSG00000046805	Mpeg1	chr19	F
319227	mmu-miR-871-5p	chrX	66810472	66810494	-	ENSMUSG00000005087	Cd44	chr2	F
319228	mmu-miR-871-5p	chrX	66810472	66810494	-	ENSMUSG00000027122	Arl14ep	chr2	F
319229	mmu-miR-871-5p	chrX	66810472	66810494	-	ENSMUSG00000027293	Ehd4	chr2	F
319230	mmu-miR-871-5p	chrX	66810472	66810494	-	ENSMUSG00000051379	Flrt3	chr2	F
319231	mmu-miR-871-5p	chrX	66810472	66810494	-	ENSMUSG00000027737	Slc7a11	chr3	F
319232	mmu-miR-871-5p	chrX	66810472	66810494	-	ENSMUSG00000074264	Amy1	chr3	F
319233	mmu-miR-871-5p	chrX	66810472	66810494	-	ENSMUSG00000028179	Cth	chr3	F
319234	mmu-miR-871-5p	chrX	66810472	66810494	-	ENSMUSG00000033883	D3Ertd254e	chr3	F
319235	mmu-miR-871-5p	chrX	66810472	66810494	-	ENSMUSG00000049100	Pcdh10	chr3	F
319236	mmu-miR-871-5p	chrX	66810472	66810494	-	ENSMUSG00000028211	Trp53inp1	chr4	F
319237	mmu-miR-871-5p	chrX	66810472	66810494	-	ENSMUSG00000039713	Plekhg5	chr4	F
319238	mmu-miR-871-5p	chrX	66810472	66810494	-	ENSMUSG00000037936	Scarb1	chr5	F
319239	mmu-miR-871-5p	chrX	66810472	66810494	-	ENSMUSG00000041313	Slc7a1	chr5	F
319240	mmu-miR-871-5p	chrX	66810472	66810494	-	ENSMUSG00000054920	Klhl5	chr5	F
319241	mmu-miR-871-5p	chrX	66810472	66810494	-	ENSMUSG00000058013	Sept11	chr5	F
319242	mmu-miR-871-5p	chrX	66810472	66810494	-	ENSMUSG00000057604	Lmcd1	chr6	F
319243	mmu-miR-871-5p	chrX	66810472	66810494	-	ENSMUSG00000030276	Ttll3	chr6	F
319244	mmu-miR-871-5p	chrX	66810472	66810494	-	ENSMUSG00000039062	Anpep	chr7	F
319245	mmu-miR-871-5p	chrX	66810472	66810494	-	ENSMUSG00000030878	Cdr2	chr7	F
319246	mmu-miR-871-5p	chrX	66810472	66810494	-	ENSMUSG00000010755	Cars	chr7	F
319247	mmu-miR-871-5p	chrX	66810472	66810494	-	ENSMUSG00000001995	Sipa1l2	chr8	F
319248	mmu-miR-871-5p	chrX	66810472	66810494	-	ENSMUSG00000032549	Rab6b	chr9	F
3193	mmu-miR-871-3p	chrX	66810438	66810460	-	ENSMUSG00000052688	Rab7b	chr1	F
31931	mmu-miR-871-3p	chrX	66810438	66810460	-	ENSMUSG00000034801	Sos2	chr12	F
31932	mmu-miR-871-3p	chrX	66810438	66810460	-	ENSMUSG00000020964	Sel1l	chr12	F
31933	mmu-miR-871-3p	chrX	66810438	66810460	-	ENSMUSG00000022358	Fbxo32	chr15	F
31934	mmu-miR-871-3p	chrX	66810438	66810460	-	ENSMUSG00000024085	Man2a1	chr17	F
31935	mmu-miR-871-3p	chrX	66810438	66810460	-	ENSMUSG00000024143	Rhoq	chr17	F
31936	mmu-miR-871-3p	chrX	66810438	66810460	-	ENSMUSG00000024427	Spry4	chr18	F
31937	mmu-miR-871-3p	chrX	66810438	66810460	-	ENSMUSG00000053617	Sh3pxd2a	chr19	F
31938	mmu-miR-871-3p	chrX	66810438	66810460	-	ENSMUSG00000051379	Flrt3	chr2	F
31939	mmu-miR-871-3p	chrX	66810438	66810460	-	ENSMUSG00000032826	Ank2	chr3	F
319310	mmu-miR-871-3p	chrX	66810438	66810460	-	ENSMUSG00000049100	Pcdh10	chr3	F
319311	mmu-miR-871-3p	chrX	66810438	66810460	-	ENSMUSG00000028034	Fubp1	chr3	F
319312	mmu-miR-871-3p	chrX	66810438	66810460	-	ENSMUSG00000028347	Tmeff1	chr4	F
319313	mmu-miR-871-3p	chrX	66810438	66810460	-	ENSMUSG00000039782	Cpeb2	chr5	F
319314	mmu-miR-871-3p	chrX	66810438	66810460	-	ENSMUSG00000002602	Axl	chr7	F
319315	mmu-miR-871-3p	chrX	66810438	66810460	-	ENSMUSG00000031654	Cbln1	chr8	F
319316	mmu-miR-871-3p	chrX	66810438	66810460	-	ENSMUSG00000032232	Cgnl1	chr9	F
319317	mmu-miR-871-3p	chrX	66810438	66810460	-	ENSMUSG00000032577	Mapkapk3	chr9	F
319318	mmu-miR-871-3p	chrX	66810438	66810460	-	ENSMUSG00000019558	Slc6a8	chrX	F
1255	mmu-miR-802-5p	chr16	93369737	93369758	+	ENSMUSG00000026674	Ddr2	chr1	F
12551	mmu-miR-802-5p	chr16	93369737	93369758	+	ENSMUSG00000026131	Dst	chr1	F
12552	mmu-miR-802-5p	chr16	93369737	93369758	+	ENSMUSG00000063659	Zbtb18	chr1	F
12553	mmu-miR-802-5p	chr16	93369737	93369758	+	ENSMUSG00000071359	Tbpl1	chr10	F
12554	mmu-miR-802-5p	chr16	93369737	93369758	+	ENSMUSG00000019838	Slc16a10	chr10	F
12555	mmu-miR-802-5p	chr16	93369737	93369758	+	ENSMUSG00000039485	Tspyl4	chr10	F
12556	mmu-miR-802-5p	chr16	93369737	93369758	+	ENSMUSG00000020948	Klhl28	chr12	F
12557	mmu-miR-802-5p	chr16	93369737	93369758	+	ENSMUSG00000015143	Actn1	chr12	F
12558	mmu-miR-802-5p	chr16	93369737	93369758	+	ENSMUSG00000020962	Gtf2a1	chr12	F
12559	mmu-miR-802-5p	chr16	93369737	93369758	+	ENSMUSG00000047832	Cdca4	chr12	F
125510	mmu-miR-802-5p	chr16	93369737	93369758	+	ENSMUSG00000020649	Rrm2	chr12	F
125511	mmu-miR-802-5p	chr16	93369737	93369758	+	ENSMUSG00000035954	Dock4	chr12	F
125512	mmu-miR-802-5p	chr16	93369737	93369758	+	ENSMUSG00000044147	Arf6	chr12	F
125513	mmu-miR-802-5p	chr16	93369737	93369758	+	ENSMUSG00000001175	Calm1	chr12	F
125514	mmu-miR-802-5p	chr16	93369737	93369758	+	ENSMUSG00000021281	Tnfaip2	chr12	F
125515	mmu-miR-802-5p	chr16	93369737	93369758	+	ENSMUSG00000007411	Mark3	chr12	F
125516	mmu-miR-802-5p	chr16	93369737	93369758	+	ENSMUSG00000078942	Naip6	chr13	F
125517	mmu-miR-802-5p	chr16	93369737	93369758	+	ENSMUSG00000045312	Lhfpl2	chr13	F
125518	mmu-miR-802-5p	chr16	93369737	93369758	+	ENSMUSG00000021792	Fam213a	chr14	F
125519	mmu-miR-802-5p	chr16	93369737	93369758	+	ENSMUSG00000021895	Arhgef3	chr14	F
125520	mmu-miR-802-5p	chr16	93369737	93369758	+	ENSMUSG00000009739	Pou6f1	chr15	F
125521	mmu-miR-802-5p	chr16	93369737	93369758	+	ENSMUSG00000022416	Cacna1i	chr15	F
125522	mmu-miR-802-5p	chr16	93369737	93369758	+	ENSMUSG00000022836	Mylk	chr16	F
125523	mmu-miR-802-5p	chr16	93369737	93369758	+	ENSMUSG00000024085	Man2a1	chr17	F
125524	mmu-miR-802-5p	chr16	93369737	93369758	+	ENSMUSG00000024247	Pkdcc	chr17	F
125525	mmu-miR-802-5p	chr16	93369737	93369758	+	ENSMUSG00000046324	Ermp1	chr19	F
125526	mmu-miR-802-5p	chr16	93369737	93369758	+	ENSMUSG00000005087	Cd44	chr2	F
125527	mmu-miR-802-5p	chr16	93369737	93369758	+	ENSMUSG00000027293	Ehd4	chr2	F
125528	mmu-miR-802-5p	chr16	93369737	93369758	+	ENSMUSG00000001864	Aif1l	chr2	F
125529	mmu-miR-802-5p	chr16	93369737	93369758	+	ENSMUSG00000027737	Slc7a11	chr3	F
125530	mmu-miR-802-5p	chr16	93369737	93369758	+	ENSMUSG00000027947	Il6ra	chr3	F
125531	mmu-miR-802-5p	chr16	93369737	93369758	+	ENSMUSG00000032826	Ank2	chr3	F
125532	mmu-miR-802-5p	chr16	93369737	93369758	+	ENSMUSG00000049100	Pcdh10	chr3	F
125533	mmu-miR-802-5p	chr16	93369737	93369758	+	ENSMUSG00000068854	Hist2h2be	chr3	F
125534	mmu-miR-802-5p	chr16	93369737	93369758	+	ENSMUSG00000053931	Cnn3	chr3	F
125535	mmu-miR-802-5p	chr16	93369737	93369758	+	ENSMUSG00000039158	Akna	chr4	F
125536	mmu-miR-802-5p	chr16	93369737	93369758	+	ENSMUSG00000028211	Trp53inp1	chr4	F
125537	mmu-miR-802-5p	chr16	93369737	93369758	+	ENSMUSG00000039987	Phtf2	chr5	F
125538	mmu-miR-802-5p	chr16	93369737	93369758	+	ENSMUSG00000037979	Ccdc92	chr5	F
125539	mmu-miR-802-5p	chr16	93369737	93369758	+	ENSMUSG00000041313	Slc7a1	chr5	F
125540	mmu-miR-802-5p	chr16	93369737	93369758	+	ENSMUSG00000054920	Klhl5	chr5	F
125541	mmu-miR-802-5p	chr16	93369737	93369758	+	ENSMUSG00000058013	Sept11	chr5	F
125542	mmu-miR-802-5p	chr16	93369737	93369758	+	ENSMUSG00000029314	Gpat3	chr5	F
125543	mmu-miR-802-5p	chr16	93369737	93369758	+	ENSMUSG00000029304	Spp1	chr5	F
125544	mmu-miR-802-5p	chr16	93369737	93369758	+	ENSMUSG00000029669	Tspan12	chr6	F
125545	mmu-miR-802-5p	chr16	93369737	93369758	+	ENSMUSG00000030022	Adamts9	chr6	F
125546	mmu-miR-802-5p	chr16	93369737	93369758	+	ENSMUSG00000030352	Tspan9	chr6	F
125547	mmu-miR-802-5p	chr16	93369737	93369758	+	ENSMUSG00000039062	Anpep	chr7	F
125548	mmu-miR-802-5p	chr16	93369737	93369758	+	ENSMUSG00000054555	Adam12	chr7	F
125549	mmu-miR-802-5p	chr16	93369737	93369758	+	ENSMUSG00000046027	Stard5	chr7	F
125550	mmu-miR-802-5p	chr16	93369737	93369758	+	ENSMUSG00000030847	Bag3	chr7	F
125551	mmu-miR-802-5p	chr16	93369737	93369758	+	ENSMUSG00000034361	Cpne2	chr8	F
125552	mmu-miR-802-5p	chr16	93369737	93369758	+	ENSMUSG00000032577	Mapkapk3	chr9	F
125553	mmu-miR-802-5p	chr16	93369737	93369758	+	ENSMUSG00000019558	Slc6a8	chrX	F
125554	mmu-miR-802-5p	chr16	93369737	93369758	+	ENSMUSG00000031327	Chic1	chrX	F
1256	mmu-miR-802-3p	chr16	93369775	93369796	+	ENSMUSG00000048126	Col6a3	chr1	F
12561	mmu-miR-802-3p	chr16	93369775	93369796	+	ENSMUSG00000027293	Ehd4	chr2	F
12562	mmu-miR-802-3p	chr16	93369775	93369796	+	ENSMUSG00000049100	Pcdh10	chr3	F
1366	mmu-miR-7b-5p	chr17	56243017	56243040	+	ENSMUSG00000063659	Zbtb18	chr1	F
13661	mmu-miR-7b-5p	chr17	56243017	56243040	+	ENSMUSG00000020262	Adarb1	chr10	F
13662	mmu-miR-7b-5p	chr17	56243017	56243040	+	ENSMUSG00000020256	Aldh1l2	chr10	F
13663	mmu-miR-7b-5p	chr17	56243017	56243040	+	ENSMUSG00000025403	Shmt2	chr10	F
13664	mmu-miR-7b-5p	chr17	56243017	56243040	+	ENSMUSG00000039485	Tspyl4	chr10	F
13665	mmu-miR-7b-5p	chr17	56243017	56243040	+	ENSMUSG00000052613	Pcdh15	chr10	F
13666	mmu-miR-7b-5p	chr17	56243017	56243040	+	ENSMUSG00000041329	Atp1b2	chr11	F
13667	mmu-miR-7b-5p	chr17	56243017	56243040	+	ENSMUSG00000020658	Efr3b	chr12	F
13668	mmu-miR-7b-5p	chr17	56243017	56243040	+	ENSMUSG00000021127	Zfp36l1	chr12	F
13669	mmu-miR-7b-5p	chr17	56243017	56243040	+	ENSMUSG00000079036	Alkbh1	chr12	F
136610	mmu-miR-7b-5p	chr17	56243017	56243040	+	ENSMUSG00000020962	Gtf2a1	chr12	F
136611	mmu-miR-7b-5p	chr17	56243017	56243040	+	ENSMUSG00000020964	Sel1l	chr12	F
136612	mmu-miR-7b-5p	chr17	56243017	56243040	+	ENSMUSG00000021276	Cinp	chr12	F
136613	mmu-miR-7b-5p	chr17	56243017	56243040	+	ENSMUSG00000047832	Cdca4	chr12	F
136614	mmu-miR-7b-5p	chr17	56243017	56243040	+	ENSMUSG00000035954	Dock4	chr12	F
136615	mmu-miR-7b-5p	chr17	56243017	56243040	+	ENSMUSG00000044147	Arf6	chr12	F
136616	mmu-miR-7b-5p	chr17	56243017	56243040	+	ENSMUSG00000033373	Fntb	chr12	F
136617	mmu-miR-7b-5p	chr17	56243017	56243040	+	ENSMUSG00000021258	Ccnk	chr12	F
136618	mmu-miR-7b-5p	chr17	56243017	56243040	+	ENSMUSG00000021275	Tecpr2	chr12	F
136619	mmu-miR-7b-5p	chr17	56243017	56243040	+	ENSMUSG00000021277	Traf3	chr12	F
136620	mmu-miR-7b-5p	chr17	56243017	56243040	+	ENSMUSG00000021281	Tnfaip2	chr12	F
136621	mmu-miR-7b-5p	chr17	56243017	56243040	+	ENSMUSG00000021286	Zfyve21	chr12	F
136622	mmu-miR-7b-5p	chr17	56243017	56243040	+	ENSMUSG00000037466	Tedc1	chr12	F
136623	mmu-miR-7b-5p	chr17	56243017	56243040	+	ENSMUSG00000021390	Ogn	chr13	F
136624	mmu-miR-7b-5p	chr17	56243017	56243040	+	ENSMUSG00000045312	Lhfpl2	chr13	F
136625	mmu-miR-7b-5p	chr17	56243017	56243040	+	ENSMUSG00000021792	Fam213a	chr14	F
136626	mmu-miR-7b-5p	chr17	56243017	56243040	+	ENSMUSG00000021738	Atxn7	chr14	F
136627	mmu-miR-7b-5p	chr17	56243017	56243040	+	ENSMUSG00000021822	Plau	chr14	F
136628	mmu-miR-7b-5p	chr17	56243017	56243040	+	ENSMUSG00000022456	Sept3	chr15	F
136629	mmu-miR-7b-5p	chr17	56243017	56243040	+	ENSMUSG00000044250	Pced1b	chr15	F
136630	mmu-miR-7b-5p	chr17	56243017	56243040	+	ENSMUSG00000022836	Mylk	chr16	F
136631	mmu-miR-7b-5p	chr17	56243017	56243040	+	ENSMUSG00000061232	H2-K1	chr17	F
136632	mmu-miR-7b-5p	chr17	56243017	56243040	+	ENSMUSG00000047407	Tgif1	chr17	F
136633	mmu-miR-7b-5p	chr17	56243017	56243040	+	ENSMUSG00000023067	Cdkn1a	chr17	F
136634	mmu-miR-7b-5p	chr17	56243017	56243040	+	ENSMUSG00000024085	Man2a1	chr17	F
136635	mmu-miR-7b-5p	chr17	56243017	56243040	+	ENSMUSG00000024143	Rhoq	chr17	F
136636	mmu-miR-7b-5p	chr17	56243017	56243040	+	ENSMUSG00000042834	Nrep	chr18	F
136637	mmu-miR-7b-5p	chr17	56243017	56243040	+	ENSMUSG00000024427	Spry4	chr18	F
136638	mmu-miR-7b-5p	chr17	56243017	56243040	+	ENSMUSG00000039982	Dtx4	chr19	F
136639	mmu-miR-7b-5p	chr17	56243017	56243040	+	ENSMUSG00000046324	Ermp1	chr19	F
136640	mmu-miR-7b-5p	chr17	56243017	56243040	+	ENSMUSG00000024817	Uhrf2	chr19	F
136641	mmu-miR-7b-5p	chr17	56243017	56243040	+	ENSMUSG00000035778	Ggta1	chr2	F
136642	mmu-miR-7b-5p	chr17	56243017	56243040	+	ENSMUSG00000025314	Ptprj	chr2	F
136643	mmu-miR-7b-5p	chr17	56243017	56243040	+	ENSMUSG00000005087	Cd44	chr2	F
136644	mmu-miR-7b-5p	chr17	56243017	56243040	+	ENSMUSG00000027175	Tcp11l1	chr2	F
136645	mmu-miR-7b-5p	chr17	56243017	56243040	+	ENSMUSG00000026749	Nek6	chr2	F
136646	mmu-miR-7b-5p	chr17	56243017	56243040	+	ENSMUSG00000027313	Chac1	chr2	F
136647	mmu-miR-7b-5p	chr17	56243017	56243040	+	ENSMUSG00000027737	Slc7a11	chr3	F
136648	mmu-miR-7b-5p	chr17	56243017	56243040	+	ENSMUSG00000033910	Gucy1a1	chr3	F
136649	mmu-miR-7b-5p	chr17	56243017	56243040	+	ENSMUSG00000053192	Mllt11	chr3	F
136650	mmu-miR-7b-5p	chr17	56243017	56243040	+	ENSMUSG00000028179	Cth	chr3	F
136651	mmu-miR-7b-5p	chr17	56243017	56243040	+	ENSMUSG00000033883	D3Ertd254e	chr3	F
136652	mmu-miR-7b-5p	chr17	56243017	56243040	+	ENSMUSG00000053931	Cnn3	chr3	F
136653	mmu-miR-7b-5p	chr17	56243017	56243040	+	ENSMUSG00000028893	Sesn2	chr4	F
136654	mmu-miR-7b-5p	chr17	56243017	56243040	+	ENSMUSG00000028347	Tmeff1	chr4	F
136655	mmu-miR-7b-5p	chr17	56243017	56243040	+	ENSMUSG00000028542	Slc6a9	chr4	F
136656	mmu-miR-7b-5p	chr17	56243017	56243040	+	ENSMUSG00000028654	Mycl	chr4	F
136657	mmu-miR-7b-5p	chr17	56243017	56243040	+	ENSMUSG00000046694	Fam46b	chr4	F
136658	mmu-miR-7b-5p	chr17	56243017	56243040	+	ENSMUSG00000039713	Plekhg5	chr4	F
136659	mmu-miR-7b-5p	chr17	56243017	56243040	+	ENSMUSG00000039474	Wfs1	chr5	F
136660	mmu-miR-7b-5p	chr17	56243017	56243040	+	ENSMUSG00000041313	Slc7a1	chr5	F
136661	mmu-miR-7b-5p	chr17	56243017	56243040	+	ENSMUSG00000029304	Spp1	chr5	F
136662	mmu-miR-7b-5p	chr17	56243017	56243040	+	ENSMUSG00000029752	Asns	chr6	F
136663	mmu-miR-7b-5p	chr17	56243017	56243040	+	ENSMUSG00000031026	Trim66	chr7	F
136664	mmu-miR-7b-5p	chr17	56243017	56243040	+	ENSMUSG00000031654	Cbln1	chr8	F
136665	mmu-miR-7b-5p	chr17	56243017	56243040	+	ENSMUSG00000014846	Tppp3	chr8	F
136666	mmu-miR-7b-5p	chr17	56243017	56243040	+	ENSMUSG00000040010	Slc7a5	chr8	F
136667	mmu-miR-7b-5p	chr17	56243017	56243040	+	ENSMUSG00000032549	Rab6b	chr9	F
136668	mmu-miR-7b-5p	chr17	56243017	56243040	+	ENSMUSG00000019558	Slc6a8	chrX	F
871	mmu-miR-7a-5p	chr13	58392841	58392863	-	ENSMUSG00000063659	Zbtb18	chr1	F
2701	mmu-miR-7a-5p	chr7	78888295	78888317	+	ENSMUSG00000063659	Zbtb18	chr1	F
8711	mmu-miR-7a-5p	chr13	58392841	58392863	-	ENSMUSG00000020262	Adarb1	chr10	F
27011	mmu-miR-7a-5p	chr7	78888295	78888317	+	ENSMUSG00000020262	Adarb1	chr10	F
8712	mmu-miR-7a-5p	chr13	58392841	58392863	-	ENSMUSG00000020256	Aldh1l2	chr10	F
27012	mmu-miR-7a-5p	chr7	78888295	78888317	+	ENSMUSG00000020256	Aldh1l2	chr10	F
8713	mmu-miR-7a-5p	chr13	58392841	58392863	-	ENSMUSG00000025403	Shmt2	chr10	F
27013	mmu-miR-7a-5p	chr7	78888295	78888317	+	ENSMUSG00000025403	Shmt2	chr10	F
8714	mmu-miR-7a-5p	chr13	58392841	58392863	-	ENSMUSG00000039485	Tspyl4	chr10	F
27014	mmu-miR-7a-5p	chr7	78888295	78888317	+	ENSMUSG00000039485	Tspyl4	chr10	F
8715	mmu-miR-7a-5p	chr13	58392841	58392863	-	ENSMUSG00000052613	Pcdh15	chr10	F
27015	mmu-miR-7a-5p	chr7	78888295	78888317	+	ENSMUSG00000052613	Pcdh15	chr10	F
8716	mmu-miR-7a-5p	chr13	58392841	58392863	-	ENSMUSG00000041329	Atp1b2	chr11	F
27016	mmu-miR-7a-5p	chr7	78888295	78888317	+	ENSMUSG00000041329	Atp1b2	chr11	F
8717	mmu-miR-7a-5p	chr13	58392841	58392863	-	ENSMUSG00000020658	Efr3b	chr12	F
27017	mmu-miR-7a-5p	chr7	78888295	78888317	+	ENSMUSG00000020658	Efr3b	chr12	F
8718	mmu-miR-7a-5p	chr13	58392841	58392863	-	ENSMUSG00000021127	Zfp36l1	chr12	F
27018	mmu-miR-7a-5p	chr7	78888295	78888317	+	ENSMUSG00000021127	Zfp36l1	chr12	F
8719	mmu-miR-7a-5p	chr13	58392841	58392863	-	ENSMUSG00000079036	Alkbh1	chr12	F
27019	mmu-miR-7a-5p	chr7	78888295	78888317	+	ENSMUSG00000079036	Alkbh1	chr12	F
87110	mmu-miR-7a-5p	chr13	58392841	58392863	-	ENSMUSG00000020962	Gtf2a1	chr12	F
270110	mmu-miR-7a-5p	chr7	78888295	78888317	+	ENSMUSG00000020962	Gtf2a1	chr12	F
87111	mmu-miR-7a-5p	chr13	58392841	58392863	-	ENSMUSG00000020964	Sel1l	chr12	F
270111	mmu-miR-7a-5p	chr7	78888295	78888317	+	ENSMUSG00000020964	Sel1l	chr12	F
87112	mmu-miR-7a-5p	chr13	58392841	58392863	-	ENSMUSG00000021276	Cinp	chr12	F
270112	mmu-miR-7a-5p	chr7	78888295	78888317	+	ENSMUSG00000021276	Cinp	chr12	F
87113	mmu-miR-7a-5p	chr13	58392841	58392863	-	ENSMUSG00000047832	Cdca4	chr12	F
270113	mmu-miR-7a-5p	chr7	78888295	78888317	+	ENSMUSG00000047832	Cdca4	chr12	F
87114	mmu-miR-7a-5p	chr13	58392841	58392863	-	ENSMUSG00000035954	Dock4	chr12	F
270114	mmu-miR-7a-5p	chr7	78888295	78888317	+	ENSMUSG00000035954	Dock4	chr12	F
87115	mmu-miR-7a-5p	chr13	58392841	58392863	-	ENSMUSG00000044147	Arf6	chr12	F
270115	mmu-miR-7a-5p	chr7	78888295	78888317	+	ENSMUSG00000044147	Arf6	chr12	F
87116	mmu-miR-7a-5p	chr13	58392841	58392863	-	ENSMUSG00000033373	Fntb	chr12	F
270116	mmu-miR-7a-5p	chr7	78888295	78888317	+	ENSMUSG00000033373	Fntb	chr12	F
87117	mmu-miR-7a-5p	chr13	58392841	58392863	-	ENSMUSG00000021258	Ccnk	chr12	F
270117	mmu-miR-7a-5p	chr7	78888295	78888317	+	ENSMUSG00000021258	Ccnk	chr12	F
87118	mmu-miR-7a-5p	chr13	58392841	58392863	-	ENSMUSG00000021275	Tecpr2	chr12	F
270118	mmu-miR-7a-5p	chr7	78888295	78888317	+	ENSMUSG00000021275	Tecpr2	chr12	F
87119	mmu-miR-7a-5p	chr13	58392841	58392863	-	ENSMUSG00000021277	Traf3	chr12	F
270119	mmu-miR-7a-5p	chr7	78888295	78888317	+	ENSMUSG00000021277	Traf3	chr12	F
87120	mmu-miR-7a-5p	chr13	58392841	58392863	-	ENSMUSG00000021281	Tnfaip2	chr12	F
270120	mmu-miR-7a-5p	chr7	78888295	78888317	+	ENSMUSG00000021281	Tnfaip2	chr12	F
87121	mmu-miR-7a-5p	chr13	58392841	58392863	-	ENSMUSG00000021286	Zfyve21	chr12	F
270121	mmu-miR-7a-5p	chr7	78888295	78888317	+	ENSMUSG00000021286	Zfyve21	chr12	F
87122	mmu-miR-7a-5p	chr13	58392841	58392863	-	ENSMUSG00000037466	Tedc1	chr12	F
270122	mmu-miR-7a-5p	chr7	78888295	78888317	+	ENSMUSG00000037466	Tedc1	chr12	F
87123	mmu-miR-7a-5p	chr13	58392841	58392863	-	ENSMUSG00000021390	Ogn	chr13	F
270123	mmu-miR-7a-5p	chr7	78888295	78888317	+	ENSMUSG00000021390	Ogn	chr13	F
87124	mmu-miR-7a-5p	chr13	58392841	58392863	-	ENSMUSG00000045312	Lhfpl2	chr13	F
270124	mmu-miR-7a-5p	chr7	78888295	78888317	+	ENSMUSG00000045312	Lhfpl2	chr13	F
87125	mmu-miR-7a-5p	chr13	58392841	58392863	-	ENSMUSG00000021792	Fam213a	chr14	F
270125	mmu-miR-7a-5p	chr7	78888295	78888317	+	ENSMUSG00000021792	Fam213a	chr14	F
87126	mmu-miR-7a-5p	chr13	58392841	58392863	-	ENSMUSG00000021738	Atxn7	chr14	F
270126	mmu-miR-7a-5p	chr7	78888295	78888317	+	ENSMUSG00000021738	Atxn7	chr14	F
87127	mmu-miR-7a-5p	chr13	58392841	58392863	-	ENSMUSG00000021822	Plau	chr14	F
270127	mmu-miR-7a-5p	chr7	78888295	78888317	+	ENSMUSG00000021822	Plau	chr14	F
87128	mmu-miR-7a-5p	chr13	58392841	58392863	-	ENSMUSG00000022456	Sept3	chr15	F
270128	mmu-miR-7a-5p	chr7	78888295	78888317	+	ENSMUSG00000022456	Sept3	chr15	F
87129	mmu-miR-7a-5p	chr13	58392841	58392863	-	ENSMUSG00000044250	Pced1b	chr15	F
270129	mmu-miR-7a-5p	chr7	78888295	78888317	+	ENSMUSG00000044250	Pced1b	chr15	F
87130	mmu-miR-7a-5p	chr13	58392841	58392863	-	ENSMUSG00000022836	Mylk	chr16	F
270130	mmu-miR-7a-5p	chr7	78888295	78888317	+	ENSMUSG00000022836	Mylk	chr16	F
87131	mmu-miR-7a-5p	chr13	58392841	58392863	-	ENSMUSG00000061232	H2-K1	chr17	F
270131	mmu-miR-7a-5p	chr7	78888295	78888317	+	ENSMUSG00000061232	H2-K1	chr17	F
87132	mmu-miR-7a-5p	chr13	58392841	58392863	-	ENSMUSG00000047407	Tgif1	chr17	F
270132	mmu-miR-7a-5p	chr7	78888295	78888317	+	ENSMUSG00000047407	Tgif1	chr17	F
87133	mmu-miR-7a-5p	chr13	58392841	58392863	-	ENSMUSG00000023067	Cdkn1a	chr17	F
270133	mmu-miR-7a-5p	chr7	78888295	78888317	+	ENSMUSG00000023067	Cdkn1a	chr17	F
87134	mmu-miR-7a-5p	chr13	58392841	58392863	-	ENSMUSG00000024085	Man2a1	chr17	F
270134	mmu-miR-7a-5p	chr7	78888295	78888317	+	ENSMUSG00000024085	Man2a1	chr17	F
87135	mmu-miR-7a-5p	chr13	58392841	58392863	-	ENSMUSG00000024143	Rhoq	chr17	F
270135	mmu-miR-7a-5p	chr7	78888295	78888317	+	ENSMUSG00000024143	Rhoq	chr17	F
87136	mmu-miR-7a-5p	chr13	58392841	58392863	-	ENSMUSG00000042834	Nrep	chr18	F
270136	mmu-miR-7a-5p	chr7	78888295	78888317	+	ENSMUSG00000042834	Nrep	chr18	F
87137	mmu-miR-7a-5p	chr13	58392841	58392863	-	ENSMUSG00000024427	Spry4	chr18	F
270137	mmu-miR-7a-5p	chr7	78888295	78888317	+	ENSMUSG00000024427	Spry4	chr18	F
87138	mmu-miR-7a-5p	chr13	58392841	58392863	-	ENSMUSG00000039982	Dtx4	chr19	F
270138	mmu-miR-7a-5p	chr7	78888295	78888317	+	ENSMUSG00000039982	Dtx4	chr19	F
87139	mmu-miR-7a-5p	chr13	58392841	58392863	-	ENSMUSG00000046324	Ermp1	chr19	F
270139	mmu-miR-7a-5p	chr7	78888295	78888317	+	ENSMUSG00000046324	Ermp1	chr19	F
87140	mmu-miR-7a-5p	chr13	58392841	58392863	-	ENSMUSG00000024817	Uhrf2	chr19	F
270140	mmu-miR-7a-5p	chr7	78888295	78888317	+	ENSMUSG00000024817	Uhrf2	chr19	F
87141	mmu-miR-7a-5p	chr13	58392841	58392863	-	ENSMUSG00000035778	Ggta1	chr2	F
270141	mmu-miR-7a-5p	chr7	78888295	78888317	+	ENSMUSG00000035778	Ggta1	chr2	F
87142	mmu-miR-7a-5p	chr13	58392841	58392863	-	ENSMUSG00000025314	Ptprj	chr2	F
270142	mmu-miR-7a-5p	chr7	78888295	78888317	+	ENSMUSG00000025314	Ptprj	chr2	F
87143	mmu-miR-7a-5p	chr13	58392841	58392863	-	ENSMUSG00000005087	Cd44	chr2	F
270143	mmu-miR-7a-5p	chr7	78888295	78888317	+	ENSMUSG00000005087	Cd44	chr2	F
87144	mmu-miR-7a-5p	chr13	58392841	58392863	-	ENSMUSG00000027175	Tcp11l1	chr2	F
270144	mmu-miR-7a-5p	chr7	78888295	78888317	+	ENSMUSG00000027175	Tcp11l1	chr2	F
87145	mmu-miR-7a-5p	chr13	58392841	58392863	-	ENSMUSG00000026749	Nek6	chr2	F
270145	mmu-miR-7a-5p	chr7	78888295	78888317	+	ENSMUSG00000026749	Nek6	chr2	F
87146	mmu-miR-7a-5p	chr13	58392841	58392863	-	ENSMUSG00000027313	Chac1	chr2	F
270146	mmu-miR-7a-5p	chr7	78888295	78888317	+	ENSMUSG00000027313	Chac1	chr2	F
87147	mmu-miR-7a-5p	chr13	58392841	58392863	-	ENSMUSG00000027737	Slc7a11	chr3	F
270147	mmu-miR-7a-5p	chr7	78888295	78888317	+	ENSMUSG00000027737	Slc7a11	chr3	F
87148	mmu-miR-7a-5p	chr13	58392841	58392863	-	ENSMUSG00000033910	Gucy1a1	chr3	F
270148	mmu-miR-7a-5p	chr7	78888295	78888317	+	ENSMUSG00000033910	Gucy1a1	chr3	F
87149	mmu-miR-7a-5p	chr13	58392841	58392863	-	ENSMUSG00000053192	Mllt11	chr3	F
270149	mmu-miR-7a-5p	chr7	78888295	78888317	+	ENSMUSG00000053192	Mllt11	chr3	F
87150	mmu-miR-7a-5p	chr13	58392841	58392863	-	ENSMUSG00000028179	Cth	chr3	F
270150	mmu-miR-7a-5p	chr7	78888295	78888317	+	ENSMUSG00000028179	Cth	chr3	F
87151	mmu-miR-7a-5p	chr13	58392841	58392863	-	ENSMUSG00000033883	D3Ertd254e	chr3	F
270151	mmu-miR-7a-5p	chr7	78888295	78888317	+	ENSMUSG00000033883	D3Ertd254e	chr3	F
87152	mmu-miR-7a-5p	chr13	58392841	58392863	-	ENSMUSG00000053931	Cnn3	chr3	F
270152	mmu-miR-7a-5p	chr7	78888295	78888317	+	ENSMUSG00000053931	Cnn3	chr3	F
87153	mmu-miR-7a-5p	chr13	58392841	58392863	-	ENSMUSG00000028893	Sesn2	chr4	F
270153	mmu-miR-7a-5p	chr7	78888295	78888317	+	ENSMUSG00000028893	Sesn2	chr4	F
87154	mmu-miR-7a-5p	chr13	58392841	58392863	-	ENSMUSG00000028347	Tmeff1	chr4	F
270154	mmu-miR-7a-5p	chr7	78888295	78888317	+	ENSMUSG00000028347	Tmeff1	chr4	F
87155	mmu-miR-7a-5p	chr13	58392841	58392863	-	ENSMUSG00000028542	Slc6a9	chr4	F
270155	mmu-miR-7a-5p	chr7	78888295	78888317	+	ENSMUSG00000028542	Slc6a9	chr4	F
87156	mmu-miR-7a-5p	chr13	58392841	58392863	-	ENSMUSG00000028654	Mycl	chr4	F
270156	mmu-miR-7a-5p	chr7	78888295	78888317	+	ENSMUSG00000028654	Mycl	chr4	F
87157	mmu-miR-7a-5p	chr13	58392841	58392863	-	ENSMUSG00000046694	Fam46b	chr4	F
270157	mmu-miR-7a-5p	chr7	78888295	78888317	+	ENSMUSG00000046694	Fam46b	chr4	F
87158	mmu-miR-7a-5p	chr13	58392841	58392863	-	ENSMUSG00000039713	Plekhg5	chr4	F
270158	mmu-miR-7a-5p	chr7	78888295	78888317	+	ENSMUSG00000039713	Plekhg5	chr4	F
87159	mmu-miR-7a-5p	chr13	58392841	58392863	-	ENSMUSG00000039474	Wfs1	chr5	F
270159	mmu-miR-7a-5p	chr7	78888295	78888317	+	ENSMUSG00000039474	Wfs1	chr5	F
87160	mmu-miR-7a-5p	chr13	58392841	58392863	-	ENSMUSG00000041313	Slc7a1	chr5	F
270160	mmu-miR-7a-5p	chr7	78888295	78888317	+	ENSMUSG00000041313	Slc7a1	chr5	F
87161	mmu-miR-7a-5p	chr13	58392841	58392863	-	ENSMUSG00000029304	Spp1	chr5	F
270161	mmu-miR-7a-5p	chr7	78888295	78888317	+	ENSMUSG00000029304	Spp1	chr5	F
87162	mmu-miR-7a-5p	chr13	58392841	58392863	-	ENSMUSG00000029752	Asns	chr6	F
270162	mmu-miR-7a-5p	chr7	78888295	78888317	+	ENSMUSG00000029752	Asns	chr6	F
87163	mmu-miR-7a-5p	chr13	58392841	58392863	-	ENSMUSG00000031026	Trim66	chr7	F
270163	mmu-miR-7a-5p	chr7	78888295	78888317	+	ENSMUSG00000031026	Trim66	chr7	F
87164	mmu-miR-7a-5p	chr13	58392841	58392863	-	ENSMUSG00000031654	Cbln1	chr8	F
270164	mmu-miR-7a-5p	chr7	78888295	78888317	+	ENSMUSG00000031654	Cbln1	chr8	F
87165	mmu-miR-7a-5p	chr13	58392841	58392863	-	ENSMUSG00000014846	Tppp3	chr8	F
270165	mmu-miR-7a-5p	chr7	78888295	78888317	+	ENSMUSG00000014846	Tppp3	chr8	F
87166	mmu-miR-7a-5p	chr13	58392841	58392863	-	ENSMUSG00000040010	Slc7a5	chr8	F
270166	mmu-miR-7a-5p	chr7	78888295	78888317	+	ENSMUSG00000040010	Slc7a5	chr8	F
87167	mmu-miR-7a-5p	chr13	58392841	58392863	-	ENSMUSG00000032549	Rab6b	chr9	F
270167	mmu-miR-7a-5p	chr7	78888295	78888317	+	ENSMUSG00000032549	Rab6b	chr9	F
87168	mmu-miR-7a-5p	chr13	58392841	58392863	-	ENSMUSG00000019558	Slc6a8	chrX	F
270168	mmu-miR-7a-5p	chr7	78888295	78888317	+	ENSMUSG00000019558	Slc6a8	chrX	F
615	mmu-miR-770-5p	chr12	109563710	109563731	+	ENSMUSG00000048126	Col6a3	chr1	T
6151	mmu-miR-770-5p	chr12	109563710	109563731	+	ENSMUSG00000026674	Ddr2	chr1	T
6152	mmu-miR-770-5p	chr12	109563710	109563731	+	ENSMUSG00000025931	Paqr8	chr1	T
6153	mmu-miR-770-5p	chr12	109563710	109563731	+	ENSMUSG00000019852	Arfgef3	chr10	T
6154	mmu-miR-770-5p	chr12	109563710	109563731	+	ENSMUSG00000034591	Slc41a2	chr10	T
6155	mmu-miR-770-5p	chr12	109563710	109563731	+	ENSMUSG00000020181	Nav3	chr10	T
6156	mmu-miR-770-5p	chr12	109563710	109563731	+	ENSMUSG00000036875	Dna2	chr10	T
6157	mmu-miR-770-5p	chr12	109563710	109563731	+	ENSMUSG00000020142	Slc1a4	chr11	T
6158	mmu-miR-770-5p	chr12	109563710	109563731	+	ENSMUSG00000020658	Efr3b	chr12	T
6159	mmu-miR-770-5p	chr12	109563710	109563731	+	ENSMUSG00000020948	Klhl28	chr12	T
61510	mmu-miR-770-5p	chr12	109563710	109563731	+	ENSMUSG00000021127	Zfp36l1	chr12	T
61511	mmu-miR-770-5p	chr12	109563710	109563731	+	ENSMUSG00000015143	Actn1	chr12	T
61512	mmu-miR-770-5p	chr12	109563710	109563731	+	ENSMUSG00000020964	Sel1l	chr12	T
61513	mmu-miR-770-5p	chr12	109563710	109563731	+	ENSMUSG00000021276	Cinp	chr12	T
61514	mmu-miR-770-5p	chr12	109563710	109563731	+	ENSMUSG00000047832	Cdca4	chr12	T
61515	mmu-miR-770-5p	chr12	109563710	109563731	+	ENSMUSG00000020668	Kif3c	chr12	T
61516	mmu-miR-770-5p	chr12	109563710	109563731	+	ENSMUSG00000037896	Rcor1	chr12	T
61517	mmu-miR-770-5p	chr12	109563710	109563731	+	ENSMUSG00000021277	Traf3	chr12	T
61518	mmu-miR-770-5p	chr12	109563710	109563731	+	ENSMUSG00000021281	Tnfaip2	chr12	T
61519	mmu-miR-770-5p	chr12	109563710	109563731	+	ENSMUSG00000007411	Mark3	chr12	T
61520	mmu-miR-770-5p	chr12	109563710	109563731	+	ENSMUSG00000021144	Mta1	chr12	T
61521	mmu-miR-770-5p	chr12	109563710	109563731	+	ENSMUSG00000022070	Bora	chr14	T
61522	mmu-miR-770-5p	chr12	109563710	109563731	+	ENSMUSG00000056069	Fam105a	chr15	T
61523	mmu-miR-770-5p	chr12	109563710	109563731	+	ENSMUSG00000043391	2510009E07Rik	chr16	T
61524	mmu-miR-770-5p	chr12	109563710	109563731	+	ENSMUSG00000002489	Tiam1	chr16	T
61525	mmu-miR-770-5p	chr12	109563710	109563731	+	ENSMUSG00000022514	Il1rap	chr16	T
61526	mmu-miR-770-5p	chr12	109563710	109563731	+	ENSMUSG00000046598	Bdh1	chr16	T
61527	mmu-miR-770-5p	chr12	109563710	109563731	+	ENSMUSG00000023883	Phf10	chr17	T
61528	mmu-miR-770-5p	chr12	109563710	109563731	+	ENSMUSG00000023067	Cdkn1a	chr17	T
61529	mmu-miR-770-5p	chr12	109563710	109563731	+	ENSMUSG00000023952	Gtpbp2	chr17	T
61530	mmu-miR-770-5p	chr12	109563710	109563731	+	ENSMUSG00000042834	Nrep	chr18	T
61531	mmu-miR-770-5p	chr12	109563710	109563731	+	ENSMUSG00000038418	Egr1	chr18	T
61532	mmu-miR-770-5p	chr12	109563710	109563731	+	ENSMUSG00000039982	Dtx4	chr19	T
61533	mmu-miR-770-5p	chr12	109563710	109563731	+	ENSMUSG00000046324	Ermp1	chr19	T
61534	mmu-miR-770-5p	chr12	109563710	109563731	+	ENSMUSG00000053617	Sh3pxd2a	chr19	T
61535	mmu-miR-770-5p	chr12	109563710	109563731	+	ENSMUSG00000046805	Mpeg1	chr19	T
61536	mmu-miR-770-5p	chr12	109563710	109563731	+	ENSMUSG00000005087	Cd44	chr2	T
61537	mmu-miR-770-5p	chr12	109563710	109563731	+	ENSMUSG00000027175	Tcp11l1	chr2	T
61538	mmu-miR-770-5p	chr12	109563710	109563731	+	ENSMUSG00000027122	Arl14ep	chr2	T
61539	mmu-miR-770-5p	chr12	109563710	109563731	+	ENSMUSG00000032715	Trib3	chr2	T
61540	mmu-miR-770-5p	chr12	109563710	109563731	+	ENSMUSG00000068735	Trp53i11	chr2	T
61541	mmu-miR-770-5p	chr12	109563710	109563731	+	ENSMUSG00000019528	Gyg	chr3	T
61542	mmu-miR-770-5p	chr12	109563710	109563731	+	ENSMUSG00000027737	Slc7a11	chr3	T
61543	mmu-miR-770-5p	chr12	109563710	109563731	+	ENSMUSG00000028078	Dclk2	chr3	T
61544	mmu-miR-770-5p	chr12	109563710	109563731	+	ENSMUSG00000053192	Mllt11	chr3	T
61545	mmu-miR-770-5p	chr12	109563710	109563731	+	ENSMUSG00000074264	Amy1	chr3	T
61546	mmu-miR-770-5p	chr12	109563710	109563731	+	ENSMUSG00000032826	Ank2	chr3	T
61547	mmu-miR-770-5p	chr12	109563710	109563731	+	ENSMUSG00000033883	D3Ertd254e	chr3	T
61548	mmu-miR-770-5p	chr12	109563710	109563731	+	ENSMUSG00000028034	Fubp1	chr3	T
61549	mmu-miR-770-5p	chr12	109563710	109563731	+	ENSMUSG00000028211	Trp53inp1	chr4	T
61550	mmu-miR-770-5p	chr12	109563710	109563731	+	ENSMUSG00000028347	Tmeff1	chr4	T
61551	mmu-miR-770-5p	chr12	109563710	109563731	+	ENSMUSG00000050212	Eva1b	chr4	T
61552	mmu-miR-770-5p	chr12	109563710	109563731	+	ENSMUSG00000073700	Klhl21	chr4	T
61553	mmu-miR-770-5p	chr12	109563710	109563731	+	ENSMUSG00000039987	Phtf2	chr5	T
61554	mmu-miR-770-5p	chr12	109563710	109563731	+	ENSMUSG00000039474	Wfs1	chr5	T
61555	mmu-miR-770-5p	chr12	109563710	109563731	+	ENSMUSG00000037979	Ccdc92	chr5	T
61556	mmu-miR-770-5p	chr12	109563710	109563731	+	ENSMUSG00000041313	Slc7a1	chr5	T
61557	mmu-miR-770-5p	chr12	109563710	109563731	+	ENSMUSG00000058013	Sept11	chr5	T
61558	mmu-miR-770-5p	chr12	109563710	109563731	+	ENSMUSG00000051950	B3glct	chr5	T
61559	mmu-miR-770-5p	chr12	109563710	109563731	+	ENSMUSG00000030022	Adamts9	chr6	T
61560	mmu-miR-770-5p	chr12	109563710	109563731	+	ENSMUSG00000002602	Axl	chr7	T
61561	mmu-miR-770-5p	chr12	109563710	109563731	+	ENSMUSG00000054555	Adam12	chr7	T
61562	mmu-miR-770-5p	chr12	109563710	109563731	+	ENSMUSG00000046027	Stard5	chr7	T
61563	mmu-miR-770-5p	chr12	109563710	109563731	+	ENSMUSG00000040010	Slc7a5	chr8	T
61564	mmu-miR-770-5p	chr12	109563710	109563731	+	ENSMUSG00000019558	Slc6a8	chrX	T
616	mmu-miR-770-3p	chr12	109563744	109563765	+	ENSMUSG00000015217	Hmgb3	chrX	T
6161	mmu-miR-770-3p	chr12	109563744	109563765	+	ENSMUSG00000026207	Speg	chr1	T
6162	mmu-miR-770-3p	chr12	109563744	109563765	+	ENSMUSG00000026547	Tagln2	chr1	T
6163	mmu-miR-770-3p	chr12	109563744	109563765	+	ENSMUSG00000020262	Adarb1	chr10	T
6164	mmu-miR-770-3p	chr12	109563744	109563765	+	ENSMUSG00000020256	Aldh1l2	chr10	T
6165	mmu-miR-770-3p	chr12	109563744	109563765	+	ENSMUSG00000025403	Shmt2	chr10	T
6166	mmu-miR-770-3p	chr12	109563744	109563765	+	ENSMUSG00000039485	Tspyl4	chr10	T
6167	mmu-miR-770-3p	chr12	109563744	109563765	+	ENSMUSG00000020331	Hcn2	chr10	T
6168	mmu-miR-770-3p	chr12	109563744	109563765	+	ENSMUSG00000020142	Slc1a4	chr11	T
6169	mmu-miR-770-3p	chr12	109563744	109563765	+	ENSMUSG00000041329	Atp1b2	chr11	T
61610	mmu-miR-770-3p	chr12	109563744	109563765	+	ENSMUSG00000034801	Sos2	chr12	T
61611	mmu-miR-770-3p	chr12	109563744	109563765	+	ENSMUSG00000021127	Zfp36l1	chr12	T
61612	mmu-miR-770-3p	chr12	109563744	109563765	+	ENSMUSG00000015143	Actn1	chr12	T
61613	mmu-miR-770-3p	chr12	109563744	109563765	+	ENSMUSG00000021240	Abcd4	chr12	T
61614	mmu-miR-770-3p	chr12	109563744	109563765	+	ENSMUSG00000020962	Gtf2a1	chr12	T
61615	mmu-miR-770-3p	chr12	109563744	109563765	+	ENSMUSG00000021266	Wars	chr12	T
61616	mmu-miR-770-3p	chr12	109563744	109563765	+	ENSMUSG00000021279	Cdc42bpb	chr12	T
61617	mmu-miR-770-3p	chr12	109563744	109563765	+	ENSMUSG00000021109	Hif1a	chr12	T
61618	mmu-miR-770-3p	chr12	109563744	109563765	+	ENSMUSG00000017843	Ppp2r5c	chr12	T
61619	mmu-miR-770-3p	chr12	109563744	109563765	+	ENSMUSG00000021275	Tecpr2	chr12	T
61620	mmu-miR-770-3p	chr12	109563744	109563765	+	ENSMUSG00000021277	Traf3	chr12	T
61621	mmu-miR-770-3p	chr12	109563744	109563765	+	ENSMUSG00000037787	Apopt1	chr12	T
61622	mmu-miR-770-3p	chr12	109563744	109563765	+	ENSMUSG00000072825	Cep170b	chr12	T
61623	mmu-miR-770-3p	chr12	109563744	109563765	+	ENSMUSG00000006356	Crip2	chr12	T
61624	mmu-miR-770-3p	chr12	109563744	109563765	+	ENSMUSG00000021822	Plau	chr14	T
61625	mmu-miR-770-3p	chr12	109563744	109563765	+	ENSMUSG00000022587	Ly6e	chr15	T
61626	mmu-miR-770-3p	chr12	109563744	109563765	+	ENSMUSG00000022416	Cacna1i	chr15	T
61627	mmu-miR-770-3p	chr12	109563744	109563765	+	ENSMUSG00000022816	Fstl1	chr16	T
61628	mmu-miR-770-3p	chr12	109563744	109563765	+	ENSMUSG00000023905	Tnfrsf12a	chr17	T
61629	mmu-miR-770-3p	chr12	109563744	109563765	+	ENSMUSG00000024039	Cbs	chr17	T
61630	mmu-miR-770-3p	chr12	109563744	109563765	+	ENSMUSG00000047407	Tgif1	chr17	T
61631	mmu-miR-770-3p	chr12	109563744	109563765	+	ENSMUSG00000033597	Caskin1	chr17	T
61632	mmu-miR-770-3p	chr12	109563744	109563765	+	ENSMUSG00000023067	Cdkn1a	chr17	T
61633	mmu-miR-770-3p	chr12	109563744	109563765	+	ENSMUSG00000023952	Gtpbp2	chr17	T
61634	mmu-miR-770-3p	chr12	109563744	109563765	+	ENSMUSG00000042834	Nrep	chr18	T
61635	mmu-miR-770-3p	chr12	109563744	109563765	+	ENSMUSG00000052026	Slc6a7	chr18	T
61636	mmu-miR-770-3p	chr12	109563744	109563765	+	ENSMUSG00000024395	Lims2	chr18	T
61637	mmu-miR-770-3p	chr12	109563744	109563765	+	ENSMUSG00000039982	Dtx4	chr19	T
61638	mmu-miR-770-3p	chr12	109563744	109563765	+	ENSMUSG00000005087	Cd44	chr2	T
61639	mmu-miR-770-3p	chr12	109563744	109563765	+	ENSMUSG00000032715	Trib3	chr2	T
61640	mmu-miR-770-3p	chr12	109563744	109563765	+	ENSMUSG00000026833	Olfm1	chr2	T
61641	mmu-miR-770-3p	chr12	109563744	109563765	+	ENSMUSG00000004105	Angptl2	chr2	T
61642	mmu-miR-770-3p	chr12	109563744	109563765	+	ENSMUSG00000026749	Nek6	chr2	T
61643	mmu-miR-770-3p	chr12	109563744	109563765	+	ENSMUSG00000027947	Il6ra	chr3	T
61644	mmu-miR-770-3p	chr12	109563744	109563765	+	ENSMUSG00000028444	Cntfr	chr4	T
61645	mmu-miR-770-3p	chr12	109563744	109563765	+	ENSMUSG00000040964	Arhgef10l	chr4	T
61646	mmu-miR-770-3p	chr12	109563744	109563765	+	ENSMUSG00000028542	Slc6a9	chr4	T
61647	mmu-miR-770-3p	chr12	109563744	109563765	+	ENSMUSG00000073700	Klhl21	chr4	T
61648	mmu-miR-770-3p	chr12	109563744	109563765	+	ENSMUSG00000037936	Scarb1	chr5	T
61649	mmu-miR-770-3p	chr12	109563744	109563765	+	ENSMUSG00000041313	Slc7a1	chr5	T
61650	mmu-miR-770-3p	chr12	109563744	109563765	+	ENSMUSG00000051950	B3glct	chr5	T
61651	mmu-miR-770-3p	chr12	109563744	109563765	+	ENSMUSG00000030352	Tspan9	chr6	T
61652	mmu-miR-770-3p	chr12	109563744	109563765	+	ENSMUSG00000030276	Ttll3	chr6	T
61653	mmu-miR-770-3p	chr12	109563744	109563765	+	ENSMUSG00000002602	Axl	chr7	T
61654	mmu-miR-770-3p	chr12	109563744	109563765	+	ENSMUSG00000030987	Stim1	chr7	T
61655	mmu-miR-770-3p	chr12	109563744	109563765	+	ENSMUSG00000032348	Gsta4	chr9	T
61656	mmu-miR-770-3p	chr12	109563744	109563765	+	ENSMUSG00000019558	Slc6a8	chrX	T
2451	mmu-miR-7670-3p	chr6	38507371	38507393	+	ENSMUSG00000021127	Zfp36l1	chr12	F
24511	mmu-miR-7670-3p	chr6	38507371	38507393	+	ENSMUSG00000042507	Elmsan1	chr12	F
24512	mmu-miR-7670-3p	chr6	38507371	38507393	+	ENSMUSG00000021782	Dlg5	chr14	F
24513	mmu-miR-7670-3p	chr6	38507371	38507393	+	ENSMUSG00000053617	Sh3pxd2a	chr19	F
24514	mmu-miR-7670-3p	chr6	38507371	38507393	+	ENSMUSG00000027947	Il6ra	chr3	F
24515	mmu-miR-7670-3p	chr6	38507371	38507393	+	ENSMUSG00000028211	Trp53inp1	chr4	F
24516	mmu-miR-7670-3p	chr6	38507371	38507393	+	ENSMUSG00000058013	Sept11	chr5	F
3308	mmu-miR-764-3p	chrX	147002324	147002345	+	ENSMUSG00000026674	Ddr2	chr1	F
33081	mmu-miR-764-3p	chrX	147002324	147002345	+	ENSMUSG00000025931	Paqr8	chr1	F
33082	mmu-miR-764-3p	chrX	147002324	147002345	+	ENSMUSG00000026207	Speg	chr1	F
33083	mmu-miR-764-3p	chrX	147002324	147002345	+	ENSMUSG00000026547	Tagln2	chr1	F
33084	mmu-miR-764-3p	chrX	147002324	147002345	+	ENSMUSG00000020262	Adarb1	chr10	F
33085	mmu-miR-764-3p	chrX	147002324	147002345	+	ENSMUSG00000025403	Shmt2	chr10	F
33086	mmu-miR-764-3p	chrX	147002324	147002345	+	ENSMUSG00000020142	Slc1a4	chr11	F
33087	mmu-miR-764-3p	chrX	147002324	147002345	+	ENSMUSG00000041329	Atp1b2	chr11	F
33088	mmu-miR-764-3p	chrX	147002324	147002345	+	ENSMUSG00000059436	Max	chr12	F
33089	mmu-miR-764-3p	chrX	147002324	147002345	+	ENSMUSG00000021127	Zfp36l1	chr12	F
330810	mmu-miR-764-3p	chrX	147002324	147002345	+	ENSMUSG00000015143	Actn1	chr12	F
330811	mmu-miR-764-3p	chrX	147002324	147002345	+	ENSMUSG00000020964	Sel1l	chr12	F
330812	mmu-miR-764-3p	chrX	147002324	147002345	+	ENSMUSG00000021189	Atxn3	chr12	F
330813	mmu-miR-764-3p	chrX	147002324	147002345	+	ENSMUSG00000054150	Syne3	chr12	F
330814	mmu-miR-764-3p	chrX	147002324	147002345	+	ENSMUSG00000021266	Wars	chr12	F
330815	mmu-miR-764-3p	chrX	147002324	147002345	+	ENSMUSG00000021276	Cinp	chr12	F
330816	mmu-miR-764-3p	chrX	147002324	147002345	+	ENSMUSG00000020668	Kif3c	chr12	F
330817	mmu-miR-764-3p	chrX	147002324	147002345	+	ENSMUSG00000021277	Traf3	chr12	F
330818	mmu-miR-764-3p	chrX	147002324	147002345	+	ENSMUSG00000021288	Klc1	chr12	F
330819	mmu-miR-764-3p	chrX	147002324	147002345	+	ENSMUSG00000072825	Cep170b	chr12	F
330820	mmu-miR-764-3p	chrX	147002324	147002345	+	ENSMUSG00000006356	Crip2	chr12	F
330821	mmu-miR-764-3p	chrX	147002324	147002345	+	ENSMUSG00000021738	Atxn7	chr14	F
330822	mmu-miR-764-3p	chrX	147002324	147002345	+	ENSMUSG00000000957	Mmp14	chr14	F
330823	mmu-miR-764-3p	chrX	147002324	147002345	+	ENSMUSG00000040618	Pck2	chr14	F
330824	mmu-miR-764-3p	chrX	147002324	147002345	+	ENSMUSG00000003469	Phyhip	chr14	F
330825	mmu-miR-764-3p	chrX	147002324	147002345	+	ENSMUSG00000022416	Cacna1i	chr15	F
330826	mmu-miR-764-3p	chrX	147002324	147002345	+	ENSMUSG00000022456	Sept3	chr15	F
330827	mmu-miR-764-3p	chrX	147002324	147002345	+	ENSMUSG00000043391	2510009E07Rik	chr16	F
330828	mmu-miR-764-3p	chrX	147002324	147002345	+	ENSMUSG00000046598	Bdh1	chr16	F
330829	mmu-miR-764-3p	chrX	147002324	147002345	+	ENSMUSG00000022816	Fstl1	chr16	F
330830	mmu-miR-764-3p	chrX	147002324	147002345	+	ENSMUSG00000033597	Caskin1	chr17	F
330831	mmu-miR-764-3p	chrX	147002324	147002345	+	ENSMUSG00000015468	Notch4	chr17	F
330832	mmu-miR-764-3p	chrX	147002324	147002345	+	ENSMUSG00000023952	Gtpbp2	chr17	F
330833	mmu-miR-764-3p	chrX	147002324	147002345	+	ENSMUSG00000024143	Rhoq	chr17	F
330834	mmu-miR-764-3p	chrX	147002324	147002345	+	ENSMUSG00000024427	Spry4	chr18	F
330835	mmu-miR-764-3p	chrX	147002324	147002345	+	ENSMUSG00000024817	Uhrf2	chr19	F
330836	mmu-miR-764-3p	chrX	147002324	147002345	+	ENSMUSG00000025314	Ptprj	chr2	F
330837	mmu-miR-764-3p	chrX	147002324	147002345	+	ENSMUSG00000005087	Cd44	chr2	F
330838	mmu-miR-764-3p	chrX	147002324	147002345	+	ENSMUSG00000032715	Trib3	chr2	F
330839	mmu-miR-764-3p	chrX	147002324	147002345	+	ENSMUSG00000004105	Angptl2	chr2	F
330840	mmu-miR-764-3p	chrX	147002324	147002345	+	ENSMUSG00000027313	Chac1	chr2	F
330841	mmu-miR-764-3p	chrX	147002324	147002345	+	ENSMUSG00000053192	Mllt11	chr3	F
330842	mmu-miR-764-3p	chrX	147002324	147002345	+	ENSMUSG00000040412	5330417C22Rik	chr3	F
[truncated: 31,865 more rows]
